# Supplementary material for: Global patterns of geo-ecological controls on the response of soil respiration to warming
Source: Research Square preprint supplement (doi:10.21203/rs.3.rs-147557/v1), 2021-02-24
Supplement: Supplementary file 1 [file 358ec026281805f1a79e3e6e.xlsx]

## Sheet: Original Experiments_overview
ID	Author	Published Year	Country	Site	Climatezone	Vegetation	Tmean [°C]	Q10	Inkubationtime [d]	Type	Sequential warming	Treated/Added	Autotrophic/Heterotrophic
1	Acosta et al.	2004	Czech Republic	Bily Kriz Experimental Ecological Study Site	Temperate	forest	10	4.09	20	Field	warmed consecutively	None	Both
2	Acosta et al.	2004	Czech Republic	Bily Kriz Experimental Ecological Study Site	Temperate	forest	10	2.91	20	Field	warmed consecutively	None	Both
3	Acosta et al.	2004	Czech Republic	Bily Kriz Experimental Ecological Study Site	Temperate	forest	10	3.42	20	Field	warmed consecutively	None	Both
4	Acosta et al.	2013	Sweden	Norunda	Boreal	forest	6.5	2.2	4.5	Field	parallel independent samples	None	Both
5	Acosta et al.	2013	Germany	Wetzstein	Temperate	forest	8	2	4.5	Field	parallel independent samples	None	Both
6	Acosta et al.	2013	Czech Republic	Bily Kriz	Temperate	forest	7.5	2.3	4.5	Field	parallel independent samples	None	Both
7	Acosta et al.	2013	Italy	Renon	Temperate	forest	7.5	2	4.5	Field	parallel independent samples	None	Both
8	Aguilos et al.	2013	Japan	Teshio Experimental Forest	Temperate	forest	15	3.18	365	Field	warmed consecutively	Warmed	Both
9	Aguilos et al.	2013	Japan	Teshio Experimental Forest	Temperate	forest	15	3.27	365	Field	warmed consecutively	Warmed	Both
10	Aguilos et al.	2013	Japan	Teshio Experimental Forest	Temperate	forest	15	3.15	365	Field	warmed consecutively	Warmed	Both
11	Aguilos et al.	2013	Japan	Teshio Experimental Forest	Temperate	forest	15	3.47	365	Field	warmed consecutively	Warmed	Both
12	Aguilos et al.	2013	Japan	Teshio Experimental Forest	Temperate	forest	15	3.33	365	Field	warmed consecutively	Warmed	Both
13	Aguilos et al.	2013	Japan	Teshio Experimental Forest	Temperate	forest	12	3.15	365	Field	warmed consecutively	Warmed	Both
14	Aguilos et al.	2013	Japan	Teshio Experimental Forest	Temperate	forest	12	3.06	365	Field	warmed consecutively	Unwarmed	Both
15	Aguilos et al.	2013	Japan	Teshio Experimental Forest	Temperate	forest	12	3	365	Field	warmed consecutively	Unwarmed	Both
16	Aguilos et al.	2013	Japan	Teshio Experimental Forest	Temperate	forest	12	3.17	365	Field	warmed consecutively	Unwarmed	Both
17	Aguilos et al.	2013	Japan	Teshio Experimental Forest	Temperate	forest	12	3.16	365	Field	warmed consecutively	Unwarmed	Both
18	Aguilos et al.	2013	Japan	Teshio Experimental Forest	Temperate	forest	12	2.99	365	Field	warmed consecutively	Unwarmed	Both
19	Aguilos et al.	2013	Japan	Teshio Experimental Forest	Temperate	forest	12	3.04	365	Field	warmed consecutively	Unwarmed	Both
20	Aguilos et al.	2013	Japan	Teshio Experimental Forest	Temperate	forest	12	3	365	Field	warmed consecutively	Control	Both
21	Aguilos et al.	2013	Japan	Teshio Experimental Forest	Temperate	forest	12	3.25	365	Field	warmed consecutively	Control	Both
22	Aguilos et al.	2013	Japan	Teshio Experimental Forest	Temperate	forest	12	3.16	365	Field	warmed consecutively	Control	Both
23	Aguilos et al.	2013	Japan	Teshio Experimental forest	Temperate	forest	15	3.05	1170	Field	warmed consecutively	Control	Both
24	Aguilos et al.	2013	Japan	Teshio Experimental forest	Temperate	forest	15	2.95	1170	Field	warmed consecutively	Control	Both
25	Almagro et al.	2009	Spain	Cehegin	Subtropical	forest	17.5	1.36	365	Field	parallel independent samples	None	Both
26	Almagro et al.	2009	Spain	Cehegin	Subtropical	grassland	17.5	1.35	365	Field	parallel independent samples	None	Both
27	Almagro et al.	2009	Spain	Cehegin	Subtropical	forest	17.5	1.12	365	Field	parallel independent samples	None	Both
28	Almaraz et al.	2009	Canada	Lods Agronomy Research Centre	Temperate	agriculture	15	4	214	Field	warmed consecutively	None	Both
29	Anderson	1973	England	London	Temperate	forest	10	3.2	365	Field	warmed consecutively	None	Both
30	Andrews et al.	2000	USA	Piedmont Region (Duke Forest)	Subtropical	forest	31	1.73	48	Lab	warmed consecutively	Preincubation-Treated	Heterotrophic
31	Andrews et al.	2000	USA	Piedmont Region (Duke Forest)	Subtropical	forest	13	3.75	48	Lab	warmed consecutively	Preincubation-Treated	Heterotrophic
32	Arevalo et al.	2012	Canada	Linaria	Boreal	agriculture	17.5	1.92	370	Lab	warmed consecutively	Preincubation-Treated	Heterotrophic
33	Arevalo et al.	2012	Canada	Linaria	Boreal	forest	17.5	1.52	370	Lab	warmed consecutively	Preincubation-Treated	Heterotrophic
34	Arevalo et al.	2012	Canada	Linaria	Boreal	forest	17.5	2.48	370	Lab	warmed consecutively	Preincubation-Treated	Heterotrophic
35	Arevalo et al.	2012	Canada	Linaria	Boreal	forest	17.5	3.02	370	Lab	warmed consecutively	Preincubation-Treated	Heterotrophic
36	Arevalo et al.	2012	Canada	Linaria	Boreal	forest	17.5	2.69	370	Lab	warmed consecutively	Preincubation-Treated	Heterotrophic
37	Arevalo et al.	2012	Canada	Linaria	Boreal	forest	17.5	1.83	370	Lab	warmed consecutively	Preincubation-Treated	Heterotrophic
38	Arevalo et al.	2012	Canada	Linaria	Boreal	grassland	17.5	2.94	370	Lab	warmed consecutively	Preincubation-Treated	Heterotrophic
39	Arevalo et al.	2012	Canada	Linaria	Boreal	grassland	17.5	1.97	370	Lab	warmed consecutively	Preincubation-Treated	Heterotrophic
40	Arevalo et al.	2012	Canada	Linaria	Boreal	agriculture	17.5	3.02	370	Lab	warmed consecutively	Preincubation-Treated	Heterotrophic
41	Arevalo et al.	2012	Canada	Linaria	Boreal	forest	17.5	1.64	370	Lab	warmed consecutively	Preincubation-Treated	Heterotrophic
42	Arevalo et al.	2012	Canada	Linaria	Boreal	forest	10.5	3.19	370	Lab	warmed consecutively	Preincubation-Treated	Heterotrophic
43	Arevalo et al.	2012	Canada	Linaria	Boreal	forest	10.5	2.69	370	Lab	warmed consecutively	Preincubation-Treated	Heterotrophic
44	Arevalo et al.	2012	Canada	Linaria	Boreal	forest	10.5	1.47	370	Lab	warmed consecutively	Preincubation-Treated	Heterotrophic
45	Arevalo et al.	2012	Canada	Linaria	Boreal	grassland	10.5	2.43	370	Lab	warmed consecutively	Preincubation-Treated	Heterotrophic
46	Arevalo et al.	2012	Canada	Linaria	Boreal	agriculture	10.5	3.43	370	Lab	warmed consecutively	Preincubation-Treated	Heterotrophic
47	Arevalo et al.	2012	Canada	Linaria	Boreal	forest	10.5	2.86	370	Lab	warmed consecutively	Preincubation-Treated	Heterotrophic
48	Arevalo et al.	2012	Canada	Linaria	Boreal	grassland	10.5	4.06	370	Lab	warmed consecutively	Preincubation-Treated	Heterotrophic
49	Arevalo et al.	2012	Canada	Linaria	Boreal	forest	10.5	2.69	370	Lab	warmed consecutively	Preincubation-Treated	Heterotrophic
50	Arevalo et al.	2012	Canada	Linaria	Boreal	forest	10.5	3.65	370	Lab	warmed consecutively	Preincubation-Treated	Heterotrophic
51	Arevalo et al.	2012	Canada	Linaria	Boreal	agriculture	10.5	2.69	370	Lab	warmed consecutively	Preincubation-Treated	Heterotrophic
52	Arneth et al.	1998	New Zealand	Balmoral Forest plantation	Temperate	forest	15	1.9	8	Field	warmed consecutively	None	Both
53	Asensio et al.	2007	Spain	Prades Mountains	Subtropical	forest	15	1	27	Field	warmed consecutively	None	Both
54	Atrashi-Andoh et al.	2012	Japan	Appi Forest	Temperate	forest	10	3.6	300	Field	warmed consecutively	Litter removed	Both
55	Atrashi-Andoh et al.	2012	Japan	Appi Forest	Temperate	forest	10	2.3	300	Field	warmed consecutively	Litter removed	Both
56	Atrashi-Andoh et al.	2012	Japan	Appi Forest	Temperate	forest	10	4.1	300	Field	warmed consecutively	Litter removed	Both
57	Atrashi-Andoh et al.	2012	Japan	Appi Forest	Temperate	forest	10	2.3	300	Field	warmed consecutively	Litter removed	Both
58	Atrashi-Andoh et al.	2012	Japan	Appi Forest	Temperate	forest	10	3.9	300	Field	warmed consecutively	Litter removed	Both
59	Atrashi-Andoh et al.	2012	Japan	Appi Forest	Temperate	forest	10	3.97	300	Field	warmed consecutively	Litter removed	Both
60	Azmal et al (a)	1996	Japan	Yamaguchi University Fields	Subtropical	agriculture	25	2.16	56	Lab	warmed consecutively	None	Both
61	Azmal et al (a)	1996	Japan	Yamaguchi University Fields	Subtropical	agriculture	25	2.51	56	Lab	warmed consecutively	None	Both
62	Azmal et al (a)	1996	Japan	Yamaguchi University Fields	Subtropical	agriculture	25	1.96	56	Lab	warmed consecutively	None	Both
63	Azmal et al (b)	1996	Japan	Yamaguchi University Fields	Subtropical	agriculture	30	1.75	56	Lab	warmed consecutively	None	Both
64	Azmal et al (b)	1996	Japan	Yamaguchi University Fields	Subtropical	agriculture	30	1.35	11	Lab	warmed consecutively	None	Both
65	Azmal et al (b)	1996	Japan	Yamaguchi University Fields	Subtropical	agriculture	30	1.89	9	Lab	warmed consecutively	None	Both
66	Bader et al.	2010	Switzerland	SCC FACE	Temperate	forest	10.5	3.39	245	Field	warmed consecutively	FACE (CO2)	Both
67	Bader et al.	2010	Switzerland	SCC FACE	Temperate	forest	10.5	3.97	245	Field	warmed consecutively	FACE (CO2)	Both
68	Bader et al.	2010	Switzerland	SCC FACE	Temperate	forest	10.5	3.3	245	Field	warmed consecutively	FACE (CO2)	Both
69	Bader et al.	2010	Switzerland	SCC FACE	Temperate	forest	10.5	3.74	245	Field	warmed consecutively	FACE (CO2)	Both
70	Bader et al.	2010	Switzerland	SCC FACE	Temperate	forest	10.5	3.47	245	Field	warmed consecutively	FACE (CO2)	Both
71	Bader et al.	2010	Switzerland	SCC FACE	Temperate	forest	10.5	3.86	245	Field	warmed consecutively	FACE (CO2)	Both
72	Bader et al.	2010	Switzerland	SCC FACE	Temperate	forest	10.5	3.22	245	Field	warmed consecutively	FACE (CO2)	Both
73	Bader et al.	2010	Switzerland	SCC FACE	Temperate	forest	10.5	3.65	245	Field	warmed consecutively	FACE (CO2)	Both
74	Bahn et al.	2008	Finland	Varriö	Boreal	grassland	5	2.71	30	Field	warmed consecutively	None	Both
75	Bahn et al.	2008	Finland	Varriö	Boreal	grassland	15	2.31	30	Field	warmed consecutively	None	Both
76	Bahn et al.	2008	Finland	Varriö	Boreal	grassland	10	2.5	30	Field	warmed consecutively	None	Both
77	Bahn et al.	2008	Finland	Varriö	Boreal	grassland	10	2.54	30	Field	warmed consecutively	None	Both
78	Bahn et al.	2008	Italy	Amplero, Abruzzi	Subtropical	grassland	15	1.69	30	Field	warmed consecutively	None	Both
79	Bahn et al.	2008	Italy	Amplero, Abruzzi	Subtropical	grassland	10	4.31	30	Field	warmed consecutively	None	Both
80	Bahn et al.	2008	Italy	Amplero, Abruzzi	Subtropical	grassland	10	4.06	30	Field	warmed consecutively	None	Both
81	Bahn et al.	2008	Denmark	Berchtesgaden 1	Temperate	grassland	5	3.33	30	Field	warmed consecutively	None	Both
82	Bahn et al.	2008	Denmark	Berchtesgaden 3	Temperate	grassland	5	3.31	30	Field	warmed consecutively	None	Both
83	Bahn et al.	2008	Denmark	Berchtesgaden 2	Temperate	grassland	10	2.35	30	Field	warmed consecutively	None	Both
84	Bahn et al.	2008	Austria	Stubai 1	Temperate	grassland	15	2.52	30	Field	warmed consecutively	None	Both
85	Bahn et al.	2008	Denmark	Berchtesgaden 3	Temperate	grassland	10	2.69	30	Field	warmed consecutively	None	Both
86	Bahn et al.	2008	Denmark	Berchtesgaden 2	Temperate	grassland	5	2.74	30	Field	warmed consecutively	None	Both
87	Bahn et al.	2008	Austria	Stubai 3	Temperate	grassland	5	4.01	30	Field	warmed consecutively	None	Both
88	Bahn et al.	2008	Austria	Stubai 3	Temperate	grassland	15	1.99	30	Field	warmed consecutively	None	Both
89	Bahn et al.	2008	Denmark	Berchtesgaden 1	Temperate	grassland	10	2.78	30	Field	warmed consecutively	None	Both
90	Bahn et al.	2008	Denmark	Berchtesgaden 3	Temperate	grassland	10	2.76	30	Field	warmed consecutively	None	Both
91	Bahn et al.	2008	Austria	Stubai 3	Temperate	grassland	10	2.83	30	Field	warmed consecutively	None	Both
92	Bahn et al.	2008	Denmark	Berchtesgaden 3	Temperate	grassland	15	2.3	30	Field	warmed consecutively	None	Both
93	Bahn et al.	2008	Denmark	Berchtesgaden 2	Temperate	grassland	15	2.02	30	Field	warmed consecutively	None	Both
94	Bahn et al.	2008	Denmark	Berchtesgaden 1	Temperate	grassland	15	2.31	30	Field	warmed consecutively	None	Both
95	Bahn et al.	2008	Denmark	Berchtesgaden 1	Temperate	grassland	10	2.71	30	Field	warmed consecutively	None	Both
96	Bahn et al.	2008	Denmark	Berchtesgaden 2	Temperate	grassland	10	2.31	30	Field	warmed consecutively	None	Both
97	Bahn et al.	2008	Austria	Stubai 3	Temperate	grassland	10	2.9	30	Field	warmed consecutively	None	Both
98	Bahn et al.	2008	Switzerland	Oensingen extensive	Temperate	grassland	5	4.39	30	Field	warmed consecutively	None	Both
99	Bahn et al.	2008	Switzerland	Oensingen extensive	Temperate	grassland	15	2.63	30	Field	warmed consecutively	None	Both
100	Bahn et al.	2008	Switzerland	Oensingen extensive	Temperate	grassland	10	3.4	30	Field	warmed consecutively	None	Both
101	Bahn et al.	2008	United Kingdom	Cow Park	Temperate	grassland	15	1.12	30	Field	warmed consecutively	None	Both
102	Bahn et al.	2008	United Kingdom	Auchencorth Moss	Temperate	grassland	15	4.32	30	Field	warmed consecutively	None	Both
103	Bahn et al.	2008	Switzerland	Oensingen extensive	Temperate	grassland	10	3.57	30	Field	warmed consecutively	None	Both
104	Ball et al.	2007	United Kingdom	Harwood Forest	Temperate	forest	15	1.08	44	Field	parallel independent samples	None	Both
105	Ball et al.	2007	United Kingdom	Harwood Forest	Temperate	grassland	15	1.18	44	Field	parallel independent samples	None	Both
106	Ball et al.	2007	United Kingdom	Harwood Forest	Temperate	forest	15	1.07	44	Field	parallel independent samples	None	Both
107	Ball et al.	2007	United Kingdom	Harwood Forest	Temperate	forest	15	1.13	44	Field	parallel independent samples	None	Both
108	Ball et al.	2007	United Kingdom	Harwood Forest	Temperate	forest	10	1.12	44	Field	parallel independent samples	None	Both
109	Ball et al.	2007	United Kingdom	Harwood Forest	Temperate	grassland	10	1.29	44	Field	parallel independent samples	None	Both
110	Ball et al.	2007	United Kingdom	Harwood Forest	Temperate	forest	10	1.11	44	Field	parallel independent samples	None	Both
111	Ball et al.	2007	United Kingdom	Harwood Forest	Temperate	forest	10	1.22	44	Field	parallel independent samples	None	Both
112	Balogh et al.	2008	Hungary	Bugacpuszta	Temperate	grassland	10	3.42	365	Field	warmed consecutively	None	Both
113	Baronti et al.	2008	Italy	Poggio S. Cecilia	Subtropical	grassland	10	1.82	17	Field	warmed consecutively	FACE (CO2)	Both
114	Baronti et al.	2008	Italy	Poggio S. Cecilia	Subtropical	grassland	10	1.73	17	Field	warmed consecutively	FACE (CO2)	Both
115	Basu et al.	1991	India	Sambalpur University	Tropical	forest	25	1.17	465	Field	warmed consecutively	None	Both
116	Beier et al.	2008	Spain	Garraf	Subtropical	grassland	23.5	1.4	365	Field	warmed consecutively	Constant water	Both
117	Beier et al.	2008	Spain	Garraf	Subtropical	grassland	23.5	1.4	365	Field	warmed consecutively	Constant water	Both
118	Bekku et al.	2003	Japan	Tsukuba	Subtropical	grassland	20	2	24	Lab	parallel independent samples	Constant water	Heterotrophic
119	Bekku et al.	2003	Japan	Tsukuba	Subtropical	grassland	11	2.8	24	Lab	parallel independent samples	Constant water	Heterotrophic
120	Bekku et al.	2003	Japan	Tsukuba	Subtropical	grassland	11	2.9	7	Lab	parallel independent samples	Constant water	Heterotrophic
121	Bekku et al.	2003	Japan	Tsukuba	Subtropical	grassland	13	2.5	24	Lab	parallel independent samples	Constant water	Heterotrophic
122	Bekku et al.	2003	Malaysia	Pasoh	Tropical	forest	24	2.1	24	Lab	parallel independent samples	Constant water	Heterotrophic
123	Bekku et al.	2003	Malaysia	Pasoh	Tropical	forest	24	2.1	7	Lab	parallel independent samples	Constant water	Heterotrophic
124	Bekku et al.	2003	Malaysia	Pasoh	Tropical	forest	32	2.1	24	Lab	parallel independent samples	Constant water	Heterotrophic
125	Bekku et al.	2003	Malaysia	Pasoh	Tropical	forest	14.5	2.7	24	Lab	parallel independent samples	Constant water	Heterotrophic
126	Bergeron et al.	2009	Canada	EOBS	Boreal	forest	10	3.22	180	Field	warmed consecutively	None	Both
127	Bergeron et al.	2009	Canada	EOBS	Boreal	forest	10	4.42	180	Field	warmed consecutively	None	Both
128	Bergeron et al.	2009	Canada	EOBS	Boreal	forest	10	4.04	180	Field	warmed consecutively	None	Both
129	Bergeron et al.	2009	Canada	EOBS	Boreal	forest	10	4.36	180	Field	warmed consecutively	None	Both
130	Bergeron et al.	2009	Canada	EOBS	Boreal	forest	10	3.54	180	Field	warmed consecutively	None	Both
131	Bergeron et al.	2009	Canada	EOBS	Boreal	forest	10	3.41	180	Field	warmed consecutively	None	Both
132	Bergeron et al.	2009	Canada	EOBS	Boreal	forest	10	4.29	180	Field	warmed consecutively	None	Both
133	Bergeron et al.	2009	Canada	EOBS	Boreal	forest	10	4.25	180	Field	warmed consecutively	None	Both
134	Bergeron et al.	2009	Canada	EOBS	Boreal	forest	10	3.33	180	Field	warmed consecutively	None	Both
135	Billes et al.	1971	France	Madeleine	Temperate	forest	15	2.73	365	Field	warmed consecutively	None	Both
136	Billes et al.	1971	France	Madeleine	Temperate	forest	15	2.73	365	Field	warmed consecutively	None	Both
137	Billes et al.	1971	France	Madeleine	Temperate	forest	15	2.73	365	Field	warmed consecutively	None	Both
138	Billes et al.	1971	France	Rouquet	Temperate	forest	15	2.33	365	Field	warmed consecutively	None	Both
139	Billes et al.	1971	France	Rouquet	Temperate	forest	15	2.33	365	Field	warmed consecutively	None	Both
140	Billes et al.	1971	France	Rouquet	Temperate	forest	15	2.33	365	Field	warmed consecutively	None	Both
141	Blanke	1996	Germany	Bonn	Temperate	forest	5	2.3	4	Field	warmed consecutively	glufosinate ammonium	Both
142	Blanke	1996	Germany	Bonn	Temperate	forest	-5	4	4	Field	warmed consecutively	glufosinate ammonium	Both
143	Blanke	1996	Germany	Bonn	Temperate	forest	15	1.65	4	Field	warmed consecutively	glufosinate ammonium	Both
144	Blanke	1996	Germany	Bonn	Temperate	forest	21	1.3	4	Field	warmed consecutively	glufosinate ammonium	Both
145	Blet-Cahraudeau et al	1990	France	Champagne Crayeuse Region	Temperate	grassland	23.5	1.4	50	Lab	parallel independent samples	Ba(OH)2	Heterotrophic
146	Blet-Cahraudeau et al	1990	France	Champagne Crayeuse Region	Temperate	agriculture	23.5	1.8	50	Lab	parallel independent samples	Ba(OH)2	Heterotrophic
147	Bolstad et al.	2004	USA	Chequamegon-NH1	Temperate	forest	10	2.35	3	Field	warmed consecutively	None	Both
148	Bolstad et al.	2004	USA	Chequamegon-NH2	Temperate	forest	10	2.32	3	Field	warmed consecutively	None	Both
149	Bolstad et al.	2004	USA	Chequamegon-NH3	Temperate	forest	10	2.25	3	Field	warmed consecutively	None	Both
150	Bolstad et al.	2004	USA	Chequamegon-IA1	Temperate	forest	10	2.23	3	Field	warmed consecutively	None	Both
151	Bolstad et al.	2004	USA	Chequamegon-NH4	Temperate	forest	10	2.17	3	Field	warmed consecutively	None	Both
152	Bolstad et al.	2004	USA	Chequamegon-IA2	Temperate	forest	10	2.11	3	Field	warmed consecutively	None	Both
153	Bolstad et al.	2004	USA	Chequamegon-MA2	Temperate	forest	10	2.08	3	Field	warmed consecutively	None	Both
154	Bolstad et al.	2004	USA	Chequamegon-MA1	Temperate	forest	10	1.94	3	Field	warmed consecutively	None	Both
155	Bolstad et al.	2005	USA	Coweeta	Temperate	forest	10	4.39	365	Field	parallel independent samples	None	Both
156	Bolstad et al.	2005	USA	Coweeta	Temperate	forest	10	3.1	365	Field	parallel independent samples	None	Both
157	Bolstad et al.	2005	USA	Coweeta	Temperate	forest	10	2.86	365	Field	parallel independent samples	None	Both
158	Bolstad et al.	2005	USA	Coweeta	Temperate	grassland	10	2.69	365	Field	parallel independent samples	None	Both
159	Bolstad et al.	2005	USA	Coweeta	Temperate	grassland	10	2.64	365	Field	parallel independent samples	None	Both
160	Bolstad et al.	2005	USA	Coweeta	Temperate	grassland	10	2.1	365	Field	parallel independent samples	None	Both
161	Bolstad et al.	2005	USA	Coweeta	Temperate	grassland	10	1.8	365	Field	parallel independent samples	None	Both
162	Bond-Lamberty et al.	2004	Canada	BOREAS NSA-W1989	Boreal	forest	20	1.3	365	Field	warmed consecutively	Weeding	Both
163	Bond-Lamberty et al.	2004	Canada	BOREAS NSA-D1989	Boreal	forest	20	1.3	365	Field	warmed consecutively	Weeding	Both
164	Bond-Lamberty et al.	2004	Canada	BOREAS NSA-D1995	Boreal	forest	20	1.3	365	Field	warmed consecutively	Weeding	Both
165	Bond-Lamberty et al.	2004	Canada	BOREAS NSA-W1995	Boreal	forest	20	1.3	365	Field	warmed consecutively	Weeding	Both
166	Bond-Lamberty et al.	2004	Canada	BOREAS NSA-W1989	Boreal	forest	10	1.5	365	Field	warmed consecutively	Weeding	Both
167	Bond-Lamberty et al.	2004	Canada	BOREAS NSA-D1995	Boreal	forest	10	1.5	365	Field	warmed consecutively	Weeding	Both
168	Bond-Lamberty et al.	2004	Canada	BOREAS NSA-W1995	Boreal	forest	10	1.5	365	Field	warmed consecutively	Weeding	Both
169	Bond-Lamberty et al.	2004	Canada	BOREAS NSA-D1998	Boreal	forest	20	1.3	365	Field	warmed consecutively	Weeding	Both
170	Bond-Lamberty et al.	2004	Canada	BOREAS NSA-W1998	Boreal	forest	20	1.3	365	Field	warmed consecutively	Weeding	Both
171	Bond-Lamberty et al.	2004	Canada	BOREAS NSA-D1998	Boreal	forest	10	1.5	365	Field	warmed consecutively	Weeding	Both
172	Bond-Lamberty et al.	2004	Canada	BOREAS NSA-W1998	Boreal	forest	10	1.5	365	Field	warmed consecutively	Weeding	Both
173	Boone et al.	1998	USA	Harvard Forest	Temperate	forest	12	3.5	240	Field	warmed consecutively	Control	Both
174	Boone et al.	1998	USA	Harvard Forest	Temperate	forest	12	3.4	240	Field	warmed consecutively	Doubel Litter	Both
175	Boone et al.	1998	USA	Harvard Forest	Temperate	forest	12	3.1	240	Field	warmed consecutively	No Litter	Both
176	Boone et al.	1998	USA	Harvard Forest	Temperate	forest	12	2.5	240	Field	warmed consecutively	No Roots	Both
177	Boone et al.	1998	USA	Harvard Forest	Temperate	forest	12	2.3	240	Field	warmed consecutively	No Inputs	Both
178	Boone et al.	1998	USA	Harvard Forest	Temperate	forest	12	2.6	240	Field	warmed consecutively	OA-Less	Both
179	Borken et al.	2002	Germany	Solling	Temperate	forest	10	3.11	519	Field	warmed consecutively	None	Both
180	Borken et al.	2002	Germany	Solling	Temperate	forest	10	1.83	519	Field	warmed consecutively	None	Both
181	Borken et al.	2002	Germany	Unterlüß	Temperate	forest	10	1.9	519	Field	warmed consecutively	None	Both
182	Borken et al.	2002	Germany	Unterlüß	Temperate	forest	10	2.92	519	Field	warmed consecutively	None	Both
183	Borken et al.	2002	Germany	Unterlüß	Temperate	forest	10	3.46	519	Field	warmed consecutively	None	Both
184	Borken et al.	2002	Germany	Unterlüß	Temperate	forest	10	3.69	519	Field	warmed consecutively	None	Both
185	Borken et al.	2002	Germany	Unterlüß	Temperate	forest	10	1.87	519	Field	warmed consecutively	None	Both
186	Borken et al.	2002	Germany	Unterlüß	Temperate	forest	10	2.9	519	Field	warmed consecutively	None	Both
187	Borken et al.	2002	Germany	Unterlüß	Temperate	forest	10	3.42	519	Field	warmed consecutively	None	Both
188	Borken et al.	2002	Germany	Unterlüß	Temperate	forest	10	3.48	519	Field	warmed consecutively	None	Both
189	Borken et al.	2002	Germany	Unterlüß	Temperate	forest	10	1.81	519	Field	warmed consecutively	None	Both
190	Borken et al.	2002	Germany	Unterlüß	Temperate	forest	10	2.94	519	Field	warmed consecutively	None	Both
191	Borken et al.	2002	Germany	Unterlüß	Temperate	forest	10	3.5	519	Field	warmed consecutively	None	Both
192	Borken et al.	2002	Germany	Unterlüß	Temperate	forest	10	3.57	519	Field	warmed consecutively	None	Both
193	Borken et al.	2002	Germany	Solling	Temperate	forest	10	2.12	519	Field	warmed consecutively	None	Both
194	Borken et al.	2002	Germany	Solling	Temperate	forest	10	3.02	519	Field	warmed consecutively	None	Both
195	Borken et al.	2002	Germany	Solling	Temperate	forest	10	3.59	519	Field	warmed consecutively	None	Both
196	Borken et al.	2002	Germany	Solling	Temperate	forest	10	3.84	519	Field	warmed consecutively	None	Both
197	Borken et al.	2002	Germany	Solling	Temperate	forest	10	1.7	519	Field	warmed consecutively	None	Both
198	Borken et al.	2002	Germany	Solling	Temperate	forest	10	2.71	519	Field	warmed consecutively	None	Both
199	Borken et al.	2002	Germany	Solling	Temperate	forest	10	2.97	519	Field	warmed consecutively	None	Both
200	Borken et al.	2002	Germany	Solling	Temperate	forest	10	3.06	519	Field	warmed consecutively	None	Both
201	Borken et al.	2002	Germany	Solling	Temperate	forest	10	2.5	519	Field	warmed consecutively	None	Both
202	Borken et al.	2002	Germany	Solling	Temperate	forest	10	2.88	519	Field	warmed consecutively	None	Both
203	Borken et al.	2006	USA	Harvard Forest-Prospect Hill	Temperate	forest	10	3.9	916	Field	warmed consecutively	None	Both
204	Borken et al.	2006	USA	Harvard Forest-Prospect Hill	Temperate	forest	10	3	916	Field	warmed consecutively	None	Both
205	Bowden et al.	2004	USA	Harvard Forest	Temperate	forest	5	1.36	734	Field	warmed consecutively	Fertilized	Both
206	Bowden et al.	2004	USA	Harvard Forest	Temperate	forest	5	1.24	734	Field	warmed consecutively	Fertilized	Both
207	Bowden et al.	2004	USA	Harvard Forest	Temperate	forest	5	1.17	734	Field	warmed consecutively	Fertilized	Both
208	Bowden et al.	2004	USA	Harvard Forest	Temperate	forest	5	2.09	734	Field	warmed consecutively	Fertilized	Both
209	Bowden et al.	2004	USA	Harvard Forest	Temperate	forest	10	2.06	734	Field	warmed consecutively	Fertilized	Both
210	Bowden et al.	2004	USA	Harvard Forest	Temperate	forest	10	1.78	734	Field	warmed consecutively	Fertilized	Both
211	Bowden et al.	2004	USA	Harvard Forest	Temperate	forest	10	1.51	734	Field	warmed consecutively	Fertilized	Both
212	Bowden et al.	2004	USA	Harvard Forest	Temperate	forest	10	4.47	734	Field	warmed consecutively	Fertilized	Both
213	Bowden et al.	2004	USA	Harvard Forest	Temperate	forest	15	3.12	734	Field	warmed consecutively	Fertilized	Both
214	Bowden et al.	2004	USA	Harvard Forest	Temperate	forest	15	2.56	734	Field	warmed consecutively	Fertilized	Both
215	Bowden et al.	2004	USA	Harvard Forest	Temperate	forest	15	1.94	734	Field	warmed consecutively	Fertilized	Both
216	Bowden et al.	2004	USA	Harvard Forest	Temperate	forest	10	1.93	734	Field	warmed consecutively	Fertilized	Both
217	Bowden et al.	2004	USA	Harvard Forest	Temperate	forest	10	1.64	734	Field	warmed consecutively	Fertilized	Both
218	Bowden et al.	2004	USA	Harvard Forest	Temperate	forest	10	1.41	734	Field	warmed consecutively	Fertilized	Both
219	Bowne et al.	2013	USA		Temperate	agriculture	15	1.8	70	Field	warmed consecutively	None	Both
220	Bridge et al.	1983	Australia	Katherine	Tropical	grassland	30	1.8	548	Field	warmed consecutively	Burned	Both
221	Brito et al.	2009	Brazil	Santa Isabel Farm	Tropical	agriculture	15	1.98	245	Field	warmed consecutively	None	Both
222	Brito et al.	2009	Brazil	Santa Isabel Farm	Tropical	agriculture	15	1.81	245	Field	warmed consecutively	None	Both
223	Brito et al.	2009	Brazil	Santa Isabel Farm	Tropical	agriculture	15	1.71	245	Field	warmed consecutively	None	Both
224	Brito et al.	2013	Spain		Temperate	forest	15	1.79	7	Field	parallel independent samples	None	Both
225	Bronson et al.	2008	Canada	Boreal Soil and Air Warming Experiment	Boreal	forest	10	4	400	Field	warmed consecutively	None	Both
226	Bronson et al.	2008	Canada	Boreal Soil and Air Warming Experiment	Boreal	forest	10	2.58	400	Field	warmed consecutively	None	Both
227	Brumme et al.	1995	Germany	Solling	Temperate	forest	10	2.3	180	Field	warmed consecutively	None	Both
228	Brumme et al.	1995	Germany	Solling	Temperate	forest	10	2.3	180	Field	warmed consecutively	None	Both
229	Brumme et al.	1995	Germany	Solling	Temperate	forest	10	2.5	180	Field	warmed consecutively	None	Both
230	Brumme et al.	1995	Germany	Solling	Temperate	forest	10	2.8	180	Field	warmed consecutively	None	Both
231	Brumme et al.	1995	Germany	Solling	Temperate	forest	10	2	180	Field	warmed consecutively	None	Both
232	Brumme et al.	1995	Germany	Solling	Temperate	forest	10	2.2	180	Field	warmed consecutively	None	Both
233	Brumme et al.	1995	Germany	Solling	Temperate	forest	10	1.9	180	Field	warmed consecutively	None	Both
234	Brumme et al.	1995	Germany	Solling	Temperate	forest	10	2.7	180	Field	warmed consecutively	None	Both
235	Brumme et al.	1995	Germany	Solling	Temperate	forest	10	1.3	180	Field	warmed consecutively	None	Both
236	Brumme et al.	1995	Germany	Solling	Temperate	forest	10	2.4	180	Field	warmed consecutively	None	Both
237	Brumme et al.	1995	Germany	Solling	Temperate	forest	10	2.1	180	Field	warmed consecutively	None	Both
238	Brye et al.	2009	USA	Wisconsin	Temperate	grassland	10	1.6	365	Field	warmed consecutively	None	Both
239	Brye et al.	2009	USA	Wisconsin	Temperate	grassland	10	1.55	365	Field	warmed consecutively	None	Both
240	Brye et al.	2009	USA	Wisconsin	Temperate	agriculture	10	1.35	365	Field	warmed consecutively	None	Both
241	Buchmann	2000	Germany	Fichtelgebirge	Temperate	forest	10	2.41	200	Field	warmed consecutively	None	Both
242	Buchmann	2000	Germany	Fichtelgebirge	Temperate	forest	10	2.34	200	Field	warmed consecutively	None	Both
243	Buchmann	2000	Germany	Fichtelgebirge	Temperate	forest	10	2.34	200	Field	warmed consecutively	None	Both
244	Buchmann	2000	Germany	Fichtelgebirge	Temperate	forest	10	3.22	200	Field	warmed consecutively	None	Both
245	Buchmann	2000	Germany	Fichtelgebirge	Temperate	forest	10	4.11	200	Field	warmed consecutively	None	Both
246	Buchmann	2000	Germany	Fichtelgebirge	Temperate	forest	10	4.11	200	Field	warmed consecutively	None	Both
247	Buchmann	2000	Germany	Fichtelgebirge	Temperate	forest	10	2.87	200	Field	warmed consecutively	None	Both
248	Buchmann	2000	Germany	Fichtelgebirge	Temperate	forest	10	3.27	200	Field	warmed consecutively	None	Both
249	Buchmann	2000	Germany	Fichtelgebirge	Temperate	forest	10	3.27	200	Field	warmed consecutively	None	Both
250	Buchmann	2000	Germany	Fichtelgebirge	Temperate	forest	10	2.39	200	Field	warmed consecutively	None	Both
251	Buchmann	2000	Germany	Fichtelgebirge	Temperate	forest	10	2.82	200	Field	warmed consecutively	None	Both
252	Buchmann	2000	Germany	Fichtelgebirge	Temperate	forest	10	2.82	200	Field	warmed consecutively	None	Both
253	Burton et al.	2002	USA	Bonanza Creek LTER	Boreal	forest	15	2.9	0.67	Lab	parallel independent samples	None	Autotrophic
254	Burton et al.	2002	USA	Bonanza Creek LTER	Boreal	forest	15	2.4	0.67	Lab	parallel independent samples	None	Autotrophic
255	Burton et al.	2002	USA	Pinus Plantation	Subtropical	agriculture	15	2.5	0.67	Lab	parallel independent samples	None	Autotrophic
256	Burton et al.	2002	USA	Quercus forest	Subtropical	forest	15	2.4	0.67	Lab	parallel independent samples	None	Autotrophic
257	Burton et al.	2002	USA	Upper Peninsula	Temperate	forest	15	2.7	0.67	Lab	parallel independent samples	None	Autotrophic
258	Burton et al.	2002	USA	Upper Peninsula	Temperate	forest	15	3	0.67	Lab	parallel independent samples	None	Autotrophic
259	Burton et al.	2002	USA	Coweeta LTER	Temperate	forest	15	2.6	0.67	Lab	parallel independent samples	None	Autotrophic
260	Burton et al.	2002	USA	Coweeta LTER	Temperate	forest	15	3.1	0.67	Lab	parallel independent samples	None	Autotrophic
261	Burton et al.	2002	USA	Coweeta LTER	Temperate	forest	15	2.4	0.67	Lab	parallel independent samples	None	Autotrophic
262	Butnor et al.	2003	USA	Duke FACE	Subtropical	forest	16	3.16	220	Field	warmed consecutively	FACE (CO2)	Both
263	Butnor et al.	2003	USA	Duke FACE	Subtropical	forest	16	3.1	220	Field	warmed consecutively	FACE (CO2)	Both
264	Butnor et al.	2003	USA	Duke FACE	Subtropical	forest	16	2.57	220	Field	warmed consecutively	FACE (CO2)	Both
265	Butnor et al.	2003	USA	Duke FACE	Subtropical	forest	16	2.4	220	Field	warmed consecutively	FACE (CO2)	Both
266	Butnor et al.	2006	USA	Croatian National Forest	Subtropical	forest	15	2	120	Field	warmed consecutively	None	Both
267	Butnor et al.	2006	USA	Croatian National Forest	Subtropical	forest	15	1.6	120	Field	warmed consecutively	None	Both
268	Buyanovsky et al.	1986	USA	Sanborn Field	Temperate	agriculture	15	1.62	970	Field	warmed consecutively	None	Both
269	Cahill et al	2009	USA	Driftless Area	Temperate	grassland	10	1.55116	365	Field	warmed consecutively	None	Both
270	Cahill et al	2009	USA	Driftless Area	Temperate	grassland	10	1.59839	365	Field	warmed consecutively	None	Both
271	Cahill et al	2009	USA	Driftless Area	Temperate	agriculture	10	1.34716	365	Field	warmed consecutively	None	Both
272	Campbell et al.	2004	USA	East Cascades-mature	Temperate	forest	10	2.01	150	Field	parallel independent samples	None	Both
273	Campbell et al.	2004	USA	East Cascades-old	Temperate	forest	10	2.01	150	Field	parallel independent samples	None	Both
274	Campbell et al.	2004	USA	East Cascades-young	Temperate	forest	10	1.65	150	Field	parallel independent samples	None	Both
275	Campbell et al.	2004	USA	East Cascades-initiation	Temperate	forest	10	1.49	150	Field	parallel independent samples	None	Both
276	Campbell et al.	2004	USA	West Cascades-initiation	Temperate	forest	10	3	150	Field	parallel independent samples	None	Both
277	Campbell et al.	2004	USA	West Cascades-young	Temperate	forest	10	2.46	150	Field	parallel independent samples	None	Both
278	Campbell et al.	2004	USA	West Cascades-old	Temperate	forest	10	2.46	150	Field	parallel independent samples	None	Both
279	Campbell et al.	2004	USA	West Cascades-mature	Temperate	forest	10	2.23	150	Field	parallel independent samples	None	Both
280	Campbell et al.	2004	USA	Coast Range-mature	Temperate	forest	10	3	150	Field	parallel independent samples	None	Both
281	Campbell et al.	2004	USA	Coast Range-old	Temperate	forest	10	3	150	Field	parallel independent samples	None	Both
282	Campbell et al.	2004	USA	Coast Range-young	Temperate	forest	10	2.23	150	Field	parallel independent samples	None	Both
283	Campbell et al.	2004	USA	Coast Range-initiation	Temperate	forest	10	1.82	150	Field	parallel independent samples	None	Both
284	Camporese et al.	2008	Italy	Zennare Basin-Cordenazzo	Temperate	agriculture	10	2.55	12	Field	warmed consecutively	None	Both
285	Camporese et al.	2008	Italy	Zennare Basin-Viale	Temperate	agriculture	10	1.73	12	Field	warmed consecutively	None	Both
286	Campos C. et al.	2006	Mexico	Cofre de Perote	Tropical	forest	16	1.18	395	Field	warmed consecutively	None	Both
287	Campos C. et al.	2006	Mexico	Cofre de Perote	Tropical	grassland	18.5	1.18	395	Field	warmed consecutively	None	Both
288	Campos C. et al.	2006	Mexico	Cofre de Perote	Tropical	agriculture	20	1.18	395	Field	warmed consecutively	None	Both
289	Cao et al.	2004	China	Haibei Research Station	Temperate	grassland	17.5	1.67	17	Field	warmed consecutively	None	Both
290	Cao et al.	2004	China	Haibei Research Station	Temperate	grassland	17.5	1.47	17	Field	warmed consecutively	None	Both
291	Caprez et al.	2012	Switzerland	Deciduous Forest	Temperate	forest	10	2.1	335	Field	warmed consecutively	None	Both
292	Caprez et al.	2012	Switzerland	Deciduous Forest	Temperate	forest	10	2.2	335	Field	warmed consecutively	None	Both
293	Carbone et al.	2008	USA	Owens Valley	Subtropical	grassland	15	1.24	150	Field	warmed consecutively	None	Both
294	Carbone et al.	2008	USA	Owens Valley	Subtropical	grassland	15	1.55	150	Field	warmed consecutively	None	Both
295	Carlyle et al.	1988	Australia	Pinus radiata Plantation	Temperate	forest	10	2.8	300	Field	warmed consecutively	Fertilized	Both
296	Carter et al.	2002	USA	Tyler	Subtropical	forest	10	2.1	548	Field	warmed consecutively	Soda-lime	Both
297	Carter et al.	2002	USA	Tyler	Subtropical	forest	10	1.3	548	Field	warmed consecutively	Soda-lime	Both
298	Cartwright et al.	2015	USA	Stones River National Battlefield	Temperate	forest	17	2.01	480	Field	warmed consecutively	None	Both
299	Castillo-Monroy et al.	2011	Spain	Aranjuez Experimental Station	Subtropical	grassland	6	4.11	1335	Field	warmed consecutively	None	Both
300	Castillo-Monroy et al.	2011	Spain	Aranjuez Experimental Station	Subtropical	grassland	7	2.58	1335	Field	warmed consecutively	None	Both
301	Castillo-Monroy et al.	2011	Spain	Aranjuez Experimental Station	Subtropical	grassland	10.5	1.74	1335	Field	warmed consecutively	None	Both
302	Castillo-Monroy et al.	2011	Spain	Aranjuez Experimental Station	Subtropical	grassland	11	1.65	1335	Field	warmed consecutively	None	Both
303	Castillo-Monroy et al.	2011	Spain	Aranjuez Experimental Station	Subtropical	grassland	11	1.8	1335	Field	warmed consecutively	None	Both
304	Castillo-Monroy et al.	2011	Spain	Aranjuez Experimental Station	Subtropical	grassland	15	1.51	1335	Field	warmed consecutively	None	Both
305	Cater et al.	2012	Slovenia	Kladje	Temperate	forest	5	2.316	240	Field	warmed consecutively	None	Both
306	Cater et al.	2012	Slovenia	Bricka	Temperate	forest	5	3.421	240	Field	warmed consecutively	None	Both
307	Cater et al.	2012	Slovenia	Bricka	Temperate	forest	5	2.509	240	Field	warmed consecutively	None	Both
308	Cater et al.	2012	Slovenia	Snezna jama	Temperate	forest	5	2.612	240	Field	warmed consecutively	None	Both
309	Cater et al.	2012	Slovenia	Snezna jama	Temperate	forest	5	1.994	240	Field	warmed consecutively	None	Both
310	Cater et al.	2012	Slovenia	Rajhenav	Temperate	forest	5	3.387	240	Field	warmed consecutively	None	Both
311	Cater et al.	2012	Slovenia	Vrhovo	Temperate	forest	5	1.6	240	Field	warmed consecutively	None	Both
312	Ceccon et al.	2011	Italy	Experimental Station of the Faculty of agriculture of the University of Bologna	Temperate	forest	18.5	2.46	5	Field	parallel independent samples	None	Both
313	Chae et al.	2011	South Korea	Gwangneung forest	Temperate	forest	10	4.06	365	Field	warmed consecutively	None	Both
314	Chae et al.	2011	South Korea	Gwangneung forest	Temperate	forest	10	3.67	365	Field	warmed consecutively	None	Both
315	Chae et al.	2011	South Korea	Gwangneung forest	Temperate	forest	10	3.32	365	Field	warmed consecutively	None	Both
316	Chang et al.	2007	China	Neixiang County	Subtropical	forest	10	2.3	331	Field	warmed consecutively	Roots removed	Heterotrophic
317	Chang et al.	2007	China	Neixiang County	Subtropical	forest	10	2.11	331	Field	warmed consecutively	Roots removed	Heterotrophic
318	Chang et al.	2007	China	Neixiang County	Subtropical	forest	10	2.55	331	Field	warmed consecutively	Roots removed	Heterotrophic
319	Chang et al.	2007	China	Neixiang County	Subtropical	forest	10	2.09	331	Field	warmed consecutively	Roots removed	Heterotrophic
320	Chang et al.	2007	China	Neixiang County	Subtropical	forest	10	2.82	331	Field	warmed consecutively	Roots removed	Heterotrophic
321	Chang et al.	2007	China	Neixiang County	Subtropical	forest	10	2.44	331	Field	warmed consecutively	Roots removed	Heterotrophic
322	Chang et al.	2007	China	Neixiang County	Subtropical	forest	10	2.39	331	Field	warmed consecutively	Roots removed	Heterotrophic
323	Chang et al.	2007	China	Neixiang County	Subtropical	forest	10	2.61	331	Field	warmed consecutively	Roots removed	Heterotrophic
324	Chang et al.	2007	China	Neixiang County	Subtropical	forest	10	2.24	331	Field	warmed consecutively	Roots removed	Heterotrophic
325	Chang et al.	2007	China	Neixiang County	Subtropical	forest	10	2.35	331	Field	warmed consecutively	Roots removed	Heterotrophic
326	Chang et al.	2007	China	Neixiang County	Subtropical	forest	10	2.44	331	Field	warmed consecutively	Roots removed	Heterotrophic
327	Chang et al.	2007	China	Neixiang County	Subtropical	forest	10	2.49	331	Field	warmed consecutively	Roots removed	Heterotrophic
328	Chang et al.	2007	China	Neixiang County	Subtropical	forest	10	2.32	331	Field	warmed consecutively	Roots removed	Heterotrophic
329	Chang et al.	2007	China	Neixiang County	Subtropical	forest	10	2.57	331	Field	warmed consecutively	Roots removed	Heterotrophic
330	Chang et al.	2007	China	Neixiang County	Subtropical	forest	10	2.18	331	Field	warmed consecutively	Roots removed	Heterotrophic
331	Chang et al.	2009	China	Xishui Forest Farm	Temperate	grassland	15	3.44	6	Field	parallel independent samples	None	Both
332	Chang et al.	2009	China	Xishui Forest Farm	Temperate	grassland	15	3.44	6	Field	parallel independent samples	None	Both
333	Chang et al.	2009	China	Xishui Forest Farm	Temperate	grassland	15	3.44	6	Field	parallel independent samples	None	Both
334	Chang et al.	2009	China	Xishui Forest Farm	Temperate	grassland	15	3.44	6	Field	parallel independent samples	None	Both
335	Chang et al.	2009	China	Xishui Forest Farm	Temperate	grassland	15	3.44	6	Field	parallel independent samples	None	Both
336	Chang et al.	2009	China	Xishui Forest Farm	Temperate	grassland	15	3.44	6	Field	parallel independent samples	None	Both
337	Chang et al.	2013	China	Xishui forest Farm	Temperate	grassland	-2.5	3.146	12	Field	parallel independent samples	None	Both
338	Chang et al.	2013	China	Xishui forest Farm	Temperate	grassland	-2.5	2.932	12	Field	parallel independent samples	None	Both
339	Chang et al.	2013	China	Xishui forest Farm	Temperate	grassland	-2.5	2.59	12	Field	parallel independent samples	None	Both
340	Chang et al.	2013	China	Xishui forest Farm	Temperate	grassland	-2.5	2.274	12	Field	parallel independent samples	None	Both
341	Chang et al.	2013	China	Xishui forest Farm	Temperate	grassland	-2.5	2.104	12	Field	parallel independent samples	None	Both
342	Chang et al.	2013	China	Xishui forest Farm	Temperate	grassland	-2.5	1.988	12	Field	parallel independent samples	None	Both
343	Chang et al. (a)	2005	China	Qilian Mountain	Temperate	grassland	5	3.8	6	Field	warmed consecutively	None	Both
344	Chang et al. (a)	2005	China	Qilian Mountain	Temperate	forest	4.5	2.6	6	Field	warmed consecutively	None	Both
345	Chang et al. (a)	2005	China	Qilian Mountain	Temperate	grassland	23	2.5	6	Field	warmed consecutively	None	Both
346	Chang et al. (a)	2005	China	Qilian Mountain	Temperate	grassland	7	2.2	6	Field	warmed consecutively	None	Both
347	Chang et al. (a)	2005	China	Qilian Mountain	Temperate	grassland	13	3	6	Field	warmed consecutively	None	Both
348	Chang et al. (b)	2005	China	Qilian Mountain	Temperate	grassland	7	3	270	Field	warmed consecutively	Roots removed	Heterotrophic
349	Chang et al. (c)	2005	China	Sunan	Temperate	grassland	6.25	2.16	150	Field	warmed consecutively	Vegetation removed	Heterotrophic
350	Chapman and Thurlow	1998	Scotland	Gilensaugh	Boreal	wetland	7	3.9	96	Lab	parallel independent samples	Vegetation removed	Heterotrophic
351	Chapman and Thurlow	1998	Scotland	Gilensaugh	Boreal	wetland	7	2.9	96	Lab	parallel independent samples	Vegetation removed	Heterotrophic
352	Chapman and Thurlow	1998	Scotland	Tonburn Moss	Boreal	wetland	10.5	3.3	96	Lab	parallel independent samples	Vegetation removed	Heterotrophic
353	Chapman and Thurlow	1998	Scotland	Gilensaugh	Boreal	wetland	17.5	2.1	96	Lab	parallel independent samples	Vegetation removed	Heterotrophic
354	Chapman and Thurlow	1998	Scotland	Gilensaugh	Boreal	wetland	17.5	2.3	96	Lab	parallel independent samples	Vegetation removed	Heterotrophic
355	Chapman and Thurlow	1998	Scotland	Loch Ard	Temperate	wetland	7	2.5	177	Lab	parallel independent samples	Vegetation removed	Heterotrophic
356	Chapman and Thurlow	1998	Scotland	Loch Ard	Temperate	wetland	7	2.7	177	Lab	parallel independent samples	Vegetation removed	Heterotrophic
357	Chapman and Thurlow	1998	Scotland	Loch Ard	Temperate	wetland	17.5	1.9	177	Lab	parallel independent samples	Vegetation removed	Heterotrophic
358	Chapman and Thurlow	1998	Scotland	Loch Ard	Temperate	wetland	17.5	2.5	177	Lab	parallel independent samples	Vegetation removed	Heterotrophic
359	Chapman et al.	1979	United Kingdom	Studland	Temperate	grassland	10	2.53	365	Field	warmed consecutively	None	Both
360	Chapman et al.	1979	United Kingdom	Studland	Temperate	grassland	10	2.35	365	Field	warmed consecutively	None	Both
361	Chapman et al.	1979	United Kingdom	Studland	Temperate	grassland	10	2.46	365	Field	warmed consecutively	None	Both
362	Chapman et al.	1979	United Kingdom	Decoy Heath	Temperate	forest	10	2.12	365	Field	warmed consecutively	None	Both
363	Chapman et al.	1979	United Kingdom	Wareham Forest	Temperate	forest	10	2.09	365	Field	warmed consecutively	None	Both
364	Chapman et al.	1979	United Kingdom	Hartland Moor	Temperate	grassland	10	2.44	365	Field	warmed consecutively	None	Both
365	Chapman et al.	1979	United Kingdom	Hartland Moor	Temperate	forest	10	2.2	365	Field	warmed consecutively	None	Both
366	Chapman et al.	1979	United Kingdom	Decoy Heath	Temperate	forest	10	2.57	365	Field	warmed consecutively	None	Both
367	Chapman et al.	1979	United Kingdom	Decoy Heath	Temperate	grassland	10	2.68	365	Field	warmed consecutively	None	Both
368	Chatterjee et al	2011	USA	Palm Springs	Subtropical	grassland	22	2.11	6	Lab	parallel independent samples	Wetting	Both
369	Chatterjee et al	2011	USA	Palm Springs	Subtropical	grassland	22	2.09	6	Lab	parallel independent samples	Wetting	Both
370	Chatterjee et al	2011	USA	Palm Springs	Subtropical	forest	22	1.86	6	Lab	parallel independent samples	Wetting	Both
371	Chen et al.	2002	Australia	Howard Springs	Tropical	forest	25	2.17	970	Field	parallel independent samples	None	Both
372	Chen et al.	2004	China	Xilingol	Temperate	grassland	10	1.78	270	Field	parallel independent samples	None	Both
373	Chen et al.	2004	China	Xilingol	Temperate	grassland	10	1.66	270	Field	parallel independent samples	None	Both
374	Chen et al.	2004	China	Xilingol	Temperate	grassland	10	1.63	270	Field	parallel independent samples	None	Both
375	Chen et al.	2004	China	Xilingol	Temperate	grassland	10	1.47	270	Field	parallel independent samples	None	Both
376	Chen et al.	2004	China	Xilingol	Temperate	grassland	10	1.75	270	Field	parallel independent samples	None	Both
377	Chen et al.	2004	China	Xilingol	Temperate	grassland	10	1.84	270	Field	parallel independent samples	None	Both
378	Chen et al.	2004	China	Xilingol	Temperate	grassland	10	1.52	270	Field	parallel independent samples	None	Both
379	Chen et al.	2004	China	Xilingol	Temperate	grassland	10	1.69	270	Field	parallel independent samples	None	Both
380	Chen et al.	2004	China	Xilingol	Temperate	grassland	10	1.62	270	Field	parallel independent samples	None	Both
381	Chen et al.	2004	China	Xilingol	Temperate	grassland	10	1.62	270	Field	parallel independent samples	None	Both
382	Chen et al.	2004	China	Xilingol	Temperate	grassland	10	1.53	270	Field	parallel independent samples	None	Both
383	Chen et al.	2007	China	Li County	Subtropical	forest	14	2.36	150	Field	parallel independent samples	None	Both
384	Chen et al.	2013	China	Beijing Olympic forest Park	Temperate	forest	15	2.3	277	Field	warmed consecutively	Vegetation removed	Both
385	Chen et al.	2013	China	Beijing Olympic forest Park	Temperate	forest	15	1.209	277	Field	warmed consecutively	Vegetation removed	Both
386	Chen et al.	2015	China	Longwang Mountain	Subtropical	forest	16.5	2.907	1095	Field	warmed consecutively	None	Both
387	Chen et al.	2015	China	Longwang Mountain	Subtropical	forest	16.5	2.795	1095	Field	warmed consecutively	None	Both
388	Chen et al.	2015	China	Longwang Mountain	Subtropical	forest	16.5	2.762	1095	Field	warmed consecutively	None	Both
389	Chen et al.	2015	China	Longwang Mountain	Subtropical	forest	16.5	2.68	1095	Field	warmed consecutively	None	Both
390	Chen et al.	2010	China	Wuyi Mountain	Subtropical	forest	20	2.93	23	Lab	warmed consecutively	Wetting	Both
391	Chen et al.	2010	China	Baekdu mountain Forest Ecosystem Research Station	Temperate	forest	20	2	23	Lab	warmed consecutively	Wetting	Both
392	Chen et al.	2010	China	Gahai-Zecha National Nature Reserve	Temperate	grassland	20	2.22	23	Lab	warmed consecutively	Wetting	Both
393	Chen et al.	2010	China	Agro-Ecological Experiment Station	Temperate	agriculture	20	2.37	23	Lab	warmed consecutively	Wetting	Both
394	Chen et al.	2010	China	Xilinguole Steppe	Temperate	grassland	20	3.55	23	Lab	warmed consecutively	Wetting	Both
395	Chen et al.	2010	China	Jianfengling National Forest Park	Tropical	forest	20	3.09	23	Lab	warmed consecutively	Wetting	Both
396	Chen et al. (a)	2003	China	Xilingol	Temperate	grassland	10	1.53	135	Field	warmed consecutively	None	Both
397	Chen et al. (a)	2003	China	Xilingol	Temperate	grassland	10	1.84	135	Field	warmed consecutively	None	Both
398	Chen et al. (a)	2003	China	Xilingol	Temperate	grassland	10	1.63	135	Field	warmed consecutively	None	Both
399	Chen et al. (a)	2003	China	Xilingol	Temperate	grassland	10	1.52	135	Field	warmed consecutively	None	Both
400	Chen et al. (a)	2003	China	Xilingol	Temperate	grassland	10	1.69	135	Field	warmed consecutively	None	Both
401	Chen et al. (a)	2003	China	Xilingol	Temperate	grassland	10	1.62	135	Field	warmed consecutively	None	Both
402	Chen et al. (a)	2003	China	Xilingol	Temperate	grassland	10	1.62	135	Field	warmed consecutively	None	Both
403	Chen et al. (a)	2003	China	Xilingol	Temperate	grassland	10	1.78	135	Field	warmed consecutively	None	Both
404	Chen et al. (a)	2003	China	Xilingol	Temperate	grassland	10	1.47	135	Field	warmed consecutively	None	Both
405	Chen et al. (a)	2003	China	Xilingol	Temperate	grassland	10	1.66	135	Field	warmed consecutively	None	Both
406	Chen et al. (a)	2003	China	Xilingol	Temperate	grassland	10	1.75	135	Field	warmed consecutively	None	Both
407	Chen et al. (b)	2003	Australia	Howard Springs	Tropical	grassland	25	2.35	515	Field	warmed consecutively	None	Both
408	Cheng et al. (b)	2013	China		Subtropical	forest	14.5	2.64	360	Field	warmed consecutively	Litter removed	Both
409	Cheng et al. (b)	2013	China		Subtropical	forest	14.5	2.69	360	Field	warmed consecutively	None	Both
410	Cheng et al. (a)	2013	China	Hydraulic Technique Popularization Station	Temperate	agriculture	15	3.669	300	Field	warmed consecutively	None	Both
411	Cheng et al. (a)	2013	China	Hydraulic Technique Popularization Station	Temperate	agriculture	15	1.878	300	Field	warmed consecutively	None	Both
412	Chou et al.	2008	USA	Sierra Foothills Research and Extension Center	Subtropical	grassland	10	1.83	730	Field	warmed consecutively	Irrigation	Both
413	Chu et al.	2006	China	Li County	Subtropical	agriculture	15	1.82	154	Field	warmed consecutively	None	Both
414	Chu et al.	2006	China	Li County	Subtropical	forest	15	2.44	154	Field	warmed consecutively	None	Both
415	Chu et al.	2006	China	Li County	Subtropical	forest	15	2.73	154	Field	warmed consecutively	None	Both
416	Clark et al.	2004	USA	Gainesville	Subtropical	forest	19.5	2.1	365	Field	warmed consecutively	None	Both
417	Clark et al.	2004	USA	Gainesville	Subtropical	forest	19.5	1.8	365	Field	warmed consecutively	None	Both
418	Clark et al.	2004	USA	Gainesville	Subtropical	forest	19.5	1.6	365	Field	warmed consecutively	None	Both
419	Coleman et al.	2000	USA	Harshaw Forestry Research Farm	Temperate	forest	10	2.45	942	Field	warmed consecutively	None	Both
420	Coleman et al.	2000	USA	Harshaw Forestry Research Farm	Temperate	forest	10	2.2	942	Field	warmed consecutively	None	Both
421	Conant et al. (b)	2008	USA	Vernon	Subtropical	agriculture	30	1.6	60	Lab	warmed consecutively	Wetting	Both
422	Conant et al. (b)	2008	USA	Vernon	Subtropical	agriculture	30	1.6	60	Lab	warmed consecutively	Wetting	Both
423	Conant et al. (b)	2008	USA	Vernon	Subtropical	agriculture	20	2	150	Lab	warmed consecutively	Wetting	Both
424	Conant et al. (b)	2008	USA	Vernon	Subtropical	agriculture	30	2	150	Lab	warmed consecutively	Wetting	Both
425	Conant et al. (b)	2008	USA	Vernon	Subtropical	grassland	30	2	300	Lab	warmed consecutively	Wetting	Both
426	Conant et al. (b)	2008	USA	Vernon	Subtropical	grassland	20	2.2	150	Lab	warmed consecutively	Wetting	Both
427	Conant et al. (b)	2008	USA	Vernon	Subtropical	grassland	30	2.2	450	Lab	warmed consecutively	Wetting	Both
428	Conant et al. (b)	2008	USA	Vernon	Subtropical	grassland	20	2.25	60	Lab	warmed consecutively	Wetting	Both
429	Conant et al. (b)	2008	USA	Vernon	Subtropical	agriculture	30	2.25	150	Lab	warmed consecutively	Wetting	Both
430	Conant et al. (b)	2008	USA	Vernon	Subtropical	agriculture	30	2.25	60	Lab	warmed consecutively	Wetting	Both
431	Conant et al. (b)	2008	USA	Vernon	Subtropical	agriculture	20	2.5	150	Lab	warmed consecutively	Wetting	Both
432	Conant et al. (b)	2008	USA	Vernon	Subtropical	agriculture	20	2.5	450	Lab	warmed consecutively	Wetting	Both
433	Conant et al. (b)	2008	USA	Vernon	Subtropical	grassland	20	2.6	300	Lab	warmed consecutively	Wetting	Both
434	Conant et al. (b)	2008	USA	Vernon	Subtropical	grassland	20	2.6	150	Lab	warmed consecutively	Wetting	Both
435	Conant et al. (b)	2008	USA	Vernon	Subtropical	grassland	9.5	2.6	60	Lab	warmed consecutively	Wetting	Both
436	Conant et al. (b)	2008	USA	Vernon	Subtropical	grassland	20	2.75	150	Lab	warmed consecutively	Wetting	Both
437	Conant et al. (b)	2008	USA	Vernon	Subtropical	agriculture	9.5	2.75	60	Lab	warmed consecutively	Wetting	Both
438	Conant et al. (b)	2008	USA	Vernon	Subtropical	grassland	30	2.8	450	Lab	warmed consecutively	Wetting	Both
439	Conant et al. (b)	2008	USA	Mandan	Temperate	agriculture	30	2.8	300	Lab	warmed consecutively	Wetting	Both
440	Conant et al. (b)	2008	USA	Mandan	Temperate	agriculture	20	3	150	Lab	warmed consecutively	Wetting	Both
441	Conant et al. (b)	2008	USA	Mandan	Temperate	grassland	9.5	3	300	Lab	warmed consecutively	Wetting	Both
442	Conant et al. (b)	2008	USA	Mandan	Temperate	grassland	20	3	150	Lab	warmed consecutively	Wetting	Both
443	Conant et al. (b)	2008	USA	Mandan	Temperate	grassland	30	3	60	Lab	warmed consecutively	Wetting	Both
444	Conant et al. (b)	2008	USA	Mandan	Temperate	grassland	9.5	3	150	Lab	warmed consecutively	Wetting	Both
445	Conant et al. (b)	2008	USA	Mandan	Temperate	agriculture	20	3.25	60	Lab	warmed consecutively	Wetting	Both
446	Conant et al. (b)	2008	USA	Mandan	Temperate	agriculture	20	3.25	450	Lab	warmed consecutively	Wetting	Both
447	Conant et al. (b)	2008	USA	Mandan	Temperate	agriculture	20	3.4	300	Lab	warmed consecutively	Wetting	Both
448	Conant et al. (b)	2008	USA	Mandan	Temperate	agriculture	20	3.5	300	Lab	warmed consecutively	Wetting	Both
449	Conant et al. (b)	2008	USA	Mandan	Temperate	grassland	30	3.5	150	Lab	warmed consecutively	Wetting	Both
450	Conant et al. (b)	2008	USA	Mandan	Temperate	grassland	30	3.5	450	Lab	warmed consecutively	Wetting	Both
451	Conant et al. (b)	2008	USA	Mandan	Temperate	grassland	30	3.75	450	Lab	warmed consecutively	Wetting	Both
452	Conant et al. (b)	2008	USA	Mandan	Temperate	grassland	30	4	300	Lab	warmed consecutively	Wetting	Both
453	Conant et al. (b)	2008	USA	Mandan	Temperate	agriculture	20	4.25	450	Lab	warmed consecutively	Wetting	Both
454	Conant et al. (b)	2008	USA	Mandan	Temperate	grassland	20	4.4	300	Lab	warmed consecutively	Wetting	Both
455	Conant et al. (b)	2008	USA	Mandan	Temperate	grassland	9.5	4.4	450	Lab	warmed consecutively	Wetting	Both
456	Conant et al. (a)	2008	USA	Vernon	Subtropical	agriculture	30	1.58	364	Lab	warmed consecutively	Wetting	Both
457	Conant et al. (a)	2008	USA	Vernon	Subtropical	grassland	30	1.6	364	Lab	warmed consecutively	Wetting	Both
458	Conant et al. (a)	2008	USA	Akron	Temperate	agriculture	30	1.88	364	Lab	warmed consecutively	Wetting	Both
459	Conant et al. (a)	2008	USA	Akron	Temperate	grassland	30	1.78	364	Lab	warmed consecutively	Wetting	Both
460	Conen et al.	2006	Germany	Halle	Temperate	agriculture	20	3.2	10	Lab	parallel independent samples	None	Both
461	Conen et al.	2006	Germany	Halle	Temperate	agriculture	20	3.2	10	Lab	parallel independent samples	None	Both
462	Conen et al.	2006	Germany	Rothalmünster	Temperate	agriculture	20	3.7	10	Lab	parallel independent samples	None	Both
463	Conen et al.	2008	Switzerland	Basel	Temperate	agriculture	20	2.9	11	Lab	parallel independent samples	None	Both
464	Conen et al.	2008	Switzerland	Basel	Temperate	agriculture	20	3.3	10	Lab	parallel independent samples	None	Both
465	Coucheney et al.	2013	Sweden	Flakaliden	Boreal	forest	6.5	4.1	150	Field	warmed consecutively	None	Both
466	Cross and Grace	2010	England	Harwood Forest	Temperate	forest	13	2.42694	78	Lab	warmed consecutively	Roots removed/Wetted	Heterotrophic
467	Cross and Grace	2010	England	Harwood Forest	Temperate	forest	13	2.34527	24	Lab	warmed consecutively	Roots removed/Wetted	Heterotrophic
468	Cross and Grace	2010	England	Harwood Forest	Temperate	forest	19	2.68488	78	Lab	warmed consecutively	Roots removed/Wetted	Heterotrophic
469	Cross and Grace	2010	England	Harwood Forest	Temperate	forest	19	2.48634	24	Lab	warmed consecutively	Roots removed/Wetted	Heterotrophic
470	Cross and Grace	2010	England	Harwood Forest	Temperate	forest	26	2.29921	24	Lab	warmed consecutively	Roots removed/Wetted	Heterotrophic
471	Cross and Grace	2010	England	Harwood Forest	Temperate	forest	26	3.06949	78	Lab	warmed consecutively	Roots removed/Wetted	Heterotrophic
472	Cross and Grace	2010	England	Harwood Forest	Temperate	forest	7.5	2.66042	78	Lab	warmed consecutively	Roots removed/Wetted	Heterotrophic
473	Cross and Grace	2010	England	Harwood Forest	Temperate	forest	7.5	2.42023	24	Lab	warmed consecutively	Roots removed/Wetted	Heterotrophic
474	Curiel Yuste et al.	2007	USA	Tonzi Ranch	Subtropical	grassland	27.5	1.9	50	Lab	warmed consecutively	Wetting	Both
475	Curiel Yuste et al.	2007	USA	Tonzi Ranch	Subtropical	grassland	27.5	1.5	100	Lab	warmed consecutively	Wetting	Both
476	Curiel Yuste et al.	2007	USA	Tonzi Ranch	Subtropical	grassland	27.5	2	50	Lab	warmed consecutively	Wetting	Both
477	Curiel Yuste et al.	2007	USA	Tonzi Ranch	Subtropical	grassland	27.5	1.5	100	Lab	warmed consecutively	Wetting	Both
478	Curiel Yuste et al.	2007	USA	Blodgett Forest Research Station	Subtropical	forest	27.5	1.7	50	Lab	warmed consecutively	Wetting	Both
479	Curiel Yuste et al.	2007	USA	Blodgett Forest Research Station	Subtropical	forest	27.5	1.5	100	Lab	warmed consecutively	Wetting	Both
480	Curiel Yuste et al.	2007	USA	Blodgett Forest Research Station	Subtropical	forest	27.5	1.7	50	Lab	warmed consecutively	Wetting	Both
481	Curiel Yuste et al.	2007	USA	Blodgett Forest Research Station	Subtropical	forest	27.5	1.6	100	Lab	warmed consecutively	Wetting	Both
482	Cussack et al.	2010	USA	Luquillo Experimental Forest	Tropical	forest	26	1.69245	245	Lab	parallel independent samples	Wetting	Both
483	Cussack et al.	2010	USA	Luquillo Experimental Forest	Tropical	forest	26	1.40566	245	Lab	parallel independent samples	Wetting	Both
484	Cussack et al.	2010	USA	Luquillo Experimental Forest	Tropical	forest	26	1.50377	245	Lab	parallel independent samples	Wetting	Both
485	Cussack et al.	2010	USA	Luquillo Experimental Forest	Tropical	forest	26	1.5717	245	Lab	parallel independent samples	Wetting	Both
486	Cussack et al.	2010	USA	Luquillo Experimental Forest	Tropical	forest	26	1.22453	245	Lab	parallel independent samples	Wetting	Both
487	Cussack et al.	2010	USA	Luquillo Experimental Forest	Tropical	forest	26	1.39057	245	Lab	parallel independent samples	Wetting	Both
488	Cussack et al.	2010	USA	Luquillo Experimental Forest	Tropical	forest	26	1.32264	245	Lab	parallel independent samples	Wetting	Both
489	Cussack et al.	2010	USA	Luquillo Experimental Forest	Tropical	forest	26	1.22453	245	Lab	parallel independent samples	Wetting	Both
490	Cussack et al.	2010	USA	Luquillo Experimental Forest	Tropical	forest	26	1.18679	245	Lab	parallel independent samples	Wetting	Both
491	Cussack et al.	2010	USA	Luquillo Experimental Forest	Tropical	forest	26	1.26981	245	Lab	parallel independent samples	Wetting	Both
492	Cussack et al.	2010	USA	Luquillo Experimental Forest	Tropical	forest	26	1.03585	245	Lab	parallel independent samples	Wetting	Both
493	Cussack et al.	2010	USA	Luquillo Experimental Forest	Tropical	forest	26	1.00566	245	Lab	parallel independent samples	Wetting	Both
494	Cussack et al.	2010	USA	Luquillo Experimental Forest	Tropical	forest	26	1.0434	245	Lab	parallel independent samples	Wetting	Both
495	Cussack et al.	2010	USA	Luquillo Experimental Forest	Tropical	forest	26	1.55303	245	Lab	parallel independent samples	Wetting	Both
496	Cussack et al.	2010	USA	Luquillo Experimental Forest	Tropical	forest	26	1.53788	245	Lab	parallel independent samples	Wetting	Both
497	Cussack et al.	2010	USA	Luquillo Experimental Forest	Tropical	forest	26	1.43182	245	Lab	parallel independent samples	Wetting	Both
498	Cussack et al.	2010	USA	Luquillo Experimental Forest	Tropical	forest	26	1.30303	245	Lab	parallel independent samples	Wetting	Both
499	Cussack et al.	2010	USA	Luquillo Experimental Forest	Tropical	forest	26	1.75283	245	Lab	parallel independent samples	Wetting	Both
500	Cussack et al.	2010	USA	Luquillo Experimental Forest	Tropical	forest	26	1.42075	245	Lab	parallel independent samples	Wetting	Both
501	Cussack et al.	2010	USA	Luquillo Experimental Forest	Tropical	forest	26	1.49623	245	Lab	parallel independent samples	Wetting	Both
502	Cussack et al.	2010	USA	Luquillo Experimental Forest	Tropical	forest	26	1.56415	245	Lab	parallel independent samples	Wetting	Both
503	Cussack et al.	2010	USA	Luquillo Experimental Forest	Tropical	forest	26	1.28491	245	Lab	parallel independent samples	Wetting	Both
504	Cussack et al.	2010	USA	Luquillo Experimental Forest	Tropical	forest	26	1.48868	245	Lab	parallel independent samples	Wetting	Both
505	Cussack et al.	2010	USA	Luquillo Experimental Forest	Tropical	forest	26	1.38302	245	Lab	parallel independent samples	Wetting	Both
506	Cussack et al.	2010	USA	Luquillo Experimental Forest	Tropical	forest	26	1.48113	245	Lab	parallel independent samples	Wetting	Both
507	Cussack et al.	2010	USA	Luquillo Experimental Forest	Tropical	forest	26	1.48868	245	Lab	parallel independent samples	Wetting	Both
508	Cussack et al.	2010	USA	Luquillo Experimental Forest	Tropical	forest	26	1.48868	245	Lab	parallel independent samples	Wetting	Both
509	Cussack et al.	2010	USA	Luquillo Experimental Forest	Tropical	forest	26	1.54151	245	Lab	parallel independent samples	Wetting	Both
510	Cussack et al.	2010	USA	Luquillo Experimental Forest	Tropical	forest	26	1.22453	245	Lab	parallel independent samples	Wetting	Both
511	Cussack et al.	2010	USA	Luquillo Experimental Forest	Tropical	forest	26	1.36792	245	Lab	parallel independent samples	Wetting	Both
512	Cussack et al.	2010	USA	Luquillo Experimental Forest	Tropical	forest	26	1.4283	245	Lab	parallel independent samples	Wetting	Both
513	Cussack et al.	2010	USA	Luquillo Experimental Forest	Tropical	forest	26	1.1717	245	Lab	parallel independent samples	Wetting	Both
514	Cussack et al.	2010	USA	Luquillo Experimental Forest	Tropical	forest	26	1.5	245	Lab	parallel independent samples	Wetting	Both
515	Cussack et al.	2010	USA	Luquillo Experimental Forest	Tropical	forest	26	1.5	245	Lab	parallel independent samples	Wetting	Both
516	Cussack et al.	2010	USA	Luquillo Experimental Forest	Tropical	forest	26	1.51515	245	Lab	parallel independent samples	Wetting	Both
517	Cussack et al.	2010	USA	Luquillo Experimental Forest	Tropical	forest	26	1.52273	245	Lab	parallel independent samples	Wetting	Both
518	Cussack et al.	2010	USA	Luquillo Experimental Forest	Tropical	forest	26	1.32576	245	Lab	parallel independent samples	Wetting	Both
519	Cussack et al.	2010	USA	Luquillo Experimental Forest	Tropical	forest	26	1.32576	245	Lab	parallel independent samples	Wetting	Both
520	Cussack et al.	2010	USA	Luquillo Experimental Forest	Tropical	forest	26	1.66596	245	Lab	parallel independent samples	Wetting	Both
521	Cussack et al.	2010	USA	Luquillo Experimental Forest	Tropical	forest	26	1.60593	245	Lab	parallel independent samples	Wetting	Both
522	Cussack et al.	2010	USA	Luquillo Experimental Forest	Tropical	forest	26	1.64371	245	Lab	parallel independent samples	Wetting	Both
523	Cussack et al.	2010	USA	Luquillo Experimental Forest	Tropical	forest	26	1.90705	245	Lab	parallel independent samples	Wetting	Both
524	Cussack et al.	2010	USA	Luquillo Experimental Forest	Tropical	forest	26	2.03511	245	Lab	parallel independent samples	Wetting	Both
525	Cussack et al.	2010	USA	Luquillo Experimental Forest	Tropical	forest	26	1.90769	245	Lab	parallel independent samples	Wetting	Both
526	Cussack et al.	2010	USA	Luquillo Experimental Forest	Tropical	forest	26	1.63756	245	Lab	parallel independent samples	Wetting	Both
527	Cussack et al.	2010	USA	Luquillo Experimental Forest	Tropical	forest	26	1.46532	245	Lab	parallel independent samples	Wetting	Both
528	Cussack et al.	2010	USA	Luquillo Experimental Forest	Tropical	forest	26	1.60902	245	Lab	parallel independent samples	Wetting	Both
529	Cussack et al.	2010	USA	Luquillo Experimental Forest	Tropical	forest	26	1.71511	245	Lab	parallel independent samples	Wetting	Both
530	Cussack et al.	2010	USA	Luquillo Experimental Forest	Tropical	forest	26	1.76809	245	Lab	parallel independent samples	Wetting	Both
531	Cussack et al.	2010	USA	Luquillo Experimental Forest	Tropical	forest	26	1.65579	245	Lab	parallel independent samples	Wetting	Both
532	Cussack et al.	2010	USA	Luquillo Experimental Forest	Tropical	forest	26	1.36339	245	Lab	parallel independent samples	Wetting	Both
533	Cussack et al.	2010	USA	Luquillo Experimental Forest	Tropical	forest	26	1.53695	245	Lab	parallel independent samples	Wetting	Both
534	Cussack et al.	2010	USA	Luquillo Experimental Forest	Tropical	forest	26	1.19905	245	Lab	parallel independent samples	Wetting	Both
535	Cussack et al.	2010	USA	Luquillo Experimental Forest	Tropical	forest	26	1.60505	245	Lab	parallel independent samples	Wetting	Both
536	Cussack et al.	2010	USA	Luquillo Experimental Forest	Tropical	forest	26	1.61238	245	Lab	parallel independent samples	Wetting	Both
537	Cussack et al.	2010	USA	Luquillo Experimental Forest	Tropical	forest	26	1.85149	245	Lab	parallel independent samples	Wetting	Both
538	Cussack et al.	2010	USA	Luquillo Experimental Forest	Tropical	forest	26	1.75941	245	Lab	parallel independent samples	Wetting	Both
539	Cussack et al.	2010	USA	Luquillo Experimental Forest	Tropical	forest	26	1.35904	245	Lab	parallel independent samples	Wetting	Both
540	Cussack et al.	2010	USA	Luquillo Experimental Forest	Tropical	forest	26	1.4177	245	Lab	parallel independent samples	Wetting	Both
541	Cussack et al.	2010	USA	Luquillo Experimental Forest	Tropical	forest	26	1.73361	245	Lab	parallel independent samples	Wetting	Both
542	Cussack et al.	2010	USA	Luquillo Experimental Forest	Tropical	forest	26	1.68864	245	Lab	parallel independent samples	Wetting	Both
543	Cussack et al.	2010	USA	Luquillo Experimental Forest	Tropical	forest	26	1.86929	245	Lab	parallel independent samples	Wetting	Both
544	Cussack et al.	2010	USA	Luquillo Experimental Forest	Tropical	forest	26	2.08752	245	Lab	parallel independent samples	Wetting	Both
545	Cussack et al.	2010	USA	Luquillo Experimental Forest	Tropical	forest	26	1.77193	245	Lab	parallel independent samples	Wetting	Both
546	Cussack et al.	2010	USA	Luquillo Experimental Forest	Tropical	forest	26	1.94527	245	Lab	parallel independent samples	Wetting	Both
547	Cussack et al.	2010	USA	Luquillo Experimental Forest	Tropical	forest	26	1.94585	245	Lab	parallel independent samples	Wetting	Both
548	Cussack et al.	2010	USA	Luquillo Experimental Forest	Tropical	forest	26	1.5781	245	Lab	parallel independent samples	Wetting	Both
549	Cussack et al.	2010	USA	Luquillo Experimental Forest	Tropical	forest	26	1.43609	245	Lab	parallel independent samples	Wetting	Both
550	Cussack et al.	2010	USA	Luquillo Experimental Forest	Tropical	forest	26	1.79782	245	Lab	parallel independent samples	Wetting	Both
551	Cussack et al.	2010	USA	Luquillo Experimental Forest	Tropical	forest	26	1.61773	245	Lab	parallel independent samples	Wetting	Both
552	Cussack et al.	2010	USA	Luquillo Experimental Forest	Tropical	forest	26	1.22722	245	Lab	parallel independent samples	Wetting	Both
553	Cussack et al.	2010	USA	Luquillo Experimental Forest	Tropical	forest	26	1.34083	245	Lab	parallel independent samples	Wetting	Both
554	Cussack et al.	2010	USA	Luquillo Experimental Forest	Tropical	forest	26	1.31888	245	Lab	parallel independent samples	Wetting	Both
555	Cussack et al.	2010	USA	Luquillo Experimental Forest	Tropical	forest	26	1.35694	245	Lab	parallel independent samples	Wetting	Both
556	Cussack et al.	2010	USA	Luquillo Experimental Forest	Tropical	forest	26	1.6652	245	Lab	parallel independent samples	Wetting	Both
557	Cussack et al.	2010	USA	Luquillo Experimental Forest	Tropical	forest	26	1.71764	245	Lab	parallel independent samples	Wetting	Both
558	Cussack et al.	2010	USA	Luquillo Experimental Forest	Tropical	forest	26	2.06951	245	Lab	parallel independent samples	Wetting	Both
559	Cussack et al.	2010	USA	Luquillo Experimental Forest	Tropical	forest	26	2.0752	245	Lab	parallel independent samples	Wetting	Both
560	Cussack et al.	2010	USA	Luquillo Experimental Forest	Tropical	forest	26	1.68236	245	Lab	parallel independent samples	Wetting	Both
561	Cussack et al.	2010	USA	Luquillo Experimental Forest	Tropical	forest	26	1.56058	245	Lab	parallel independent samples	Wetting	Both
562	Dalias et al.	2001	Sweden	Vindeln	Boreal	forest	7	4	550	Lab	parallel independent samples	Wetting	Both
563	Dalias et al.	2001	Sweden	Vindeln	Boreal	forest	13	2	550	Lab	parallel independent samples	Wetting	Both
564	Dalias et al.	2001	France	Thezan	Subtropical	forest	26.5	1.6	550	Lab	parallel independent samples	Wetting	Both
565	Dalias et al.	2001	France	Thezan	Subtropical	forest	26.5	1.3	550	Lab	parallel independent samples	Wetting	Both
566	Dalias et al.	2001	France	Thezan	Subtropical	forest	7	3.8	550	Lab	parallel independent samples	Wetting	Both
567	Dalias et al.	2001	France	La Clape	Subtropical	forest	13	1.7	550	Lab	parallel independent samples	Wetting	Both
568	Dalias et al.	2001	France	Thezan	Subtropical	forest	13	2.8	550	Lab	parallel independent samples	Wetting	Both
569	Dalias et al.	2001	France	La Clape	Subtropical	forest	19.5	1.8	550	Lab	parallel independent samples	Wetting	Both
570	Dalias et al.	2001	France	Thezan	Subtropical	forest	19.5	1.9	550	Lab	parallel independent samples	Wetting	Both
571	Dalias et al.	2001	France	La Clape	Subtropical	forest	26.5	1.8	550	Lab	parallel independent samples	Wetting	Both
572	Dalias et al.	2001	France	Thezan	Subtropical	forest	13	1.6	550	Lab	parallel independent samples	Wetting	Both
573	Dalias et al.	2001	France	Thezan	Subtropical	forest	19.5	1.6	550	Lab	parallel independent samples	Wetting	Both
574	Dalias et al.	2001	Germany	Waldstein	Temperate	forest	26.5	1.1	550	Lab	parallel independent samples	Wetting	Both
575	Dalias et al.	2001	Germany	Waldstein	Temperate	forest	26.5	1	550	Lab	parallel independent samples	Wetting	Both
576	Dalias et al.	2001	Germany	Waldstein	Temperate	forest	7	1.9	550	Lab	parallel independent samples	Wetting	Both
577	Dalias et al.	2001	Germany	Waldstein	Temperate	forest	7	3	550	Lab	parallel independent samples	Wetting	Both
578	Dalias et al.	2001	Germany	Waldstein	Temperate	forest	13	1.5	550	Lab	parallel independent samples	Wetting	Both
579	Dalias et al.	2001	Germany	Waldstein	Temperate	forest	19.5	2	550	Lab	parallel independent samples	Wetting	Both
580	Dalias et al.	2001	Germany	Waldstein	Temperate	forest	13	2.1	550	Lab	parallel independent samples	Wetting	Both
581	Dalias et al.	2001	Germany	Waldstein	Temperate	forest	19.5	1.5	550	Lab	parallel independent samples	Wetting	Both
582	Dalias et al.	2001	UK	Haldon	Temperate	forest	26.5	3.4	550	Lab	parallel independent samples	Wetting	Both
583	Dalias et al.	2001	UK	Haldon	Temperate	forest	7	3.5	550	Lab	parallel independent samples	Wetting	Both
584	Dalias et al.	2001	UK	Haldon	Temperate	forest	13	3.4	550	Lab	parallel independent samples	Wetting	Both
585	Dalias et al.	2001	UK	Haldon	Temperate	forest	19.5	3.1	550	Lab	parallel independent samples	Wetting	Both
586	Darenova et al.	2014	Czech Republic	Bily Kriz	Temperate	forest	12.5	2	165	Field	warmed consecutively	None	Both
587	Darenova et al.	2014	Czech Republic	Bily Kriz	Temperate	forest	12.5	1.9	165	Field	warmed consecutively	None	Both
588	Davidson et al.	1998	USA	Harvard Forest	Temperate	forest	10	3.5	35	Field	warmed consecutively	None	Both
589	Davidson et al.	1998	USA	Harvard Forest	Temperate	forest	10	4.5	35	Field	warmed consecutively	None	Both
590	Davidson et al.	1998	USA	Harvard Forest	Temperate	forest	10	4	35	Field	warmed consecutively	None	Both
591	Davidson et al.	1998	USA	Harvard Forest	Temperate	forest	10	4.1	35	Field	warmed consecutively	None	Both
592	Davidson et al.	1998	USA	Harvard Forest	Temperate	forest	10	3.4	35	Field	warmed consecutively	None	Both
593	De Neve	1996	Belgium	Pittem	Temperate	agriculture	20.5	1.6	300	Lab	parallel independent samples	Vegetation removed	Both
594	De Neve	1996	Belgium	Pittem	Temperate	agriculture	20.5	4	300	Lab	parallel independent samples	Vegetation removed	Both
595	De Neve	1996	Belgium	Pittem	Temperate	agriculture	20.5	2.01	300	Lab	parallel independent samples	Vegetation removed	Both
596	De Neve	1996	Belgium	Pittem	Temperate	agriculture	20.5	3.52	300	Lab	parallel independent samples	Vegetation removed	Both
597	De Neve	1996	Belgium	Pittem	Temperate	agriculture	20.5	2.39	300	Lab	parallel independent samples	Vegetation removed	Both
598	De Neve	1996	Belgium	Pittem	Temperate	agriculture	10.75	2.72	300	Lab	parallel independent samples	Vegetation removed	Both
599	De Neve	1996	Belgium	Pittem	Temperate	agriculture	10.75	2.26	300	Lab	parallel independent samples	Vegetation removed	Both
600	De Neve	1996	Belgium	Pittem	Temperate	agriculture	10.75	3.1	300	Lab	parallel independent samples	Vegetation removed	Both
601	De Neve	1996	Belgium	Pittem	Temperate	agriculture	10.75	2.43	300	Lab	parallel independent samples	Vegetation removed	Both
602	De Neve	1996	Belgium	Pittem	Temperate	agriculture	10.75	1.94	300	Lab	parallel independent samples	Vegetation removed	Both
603	De Santo et al.	1972	Italy	Monte Taburno	Subtropical	forest	5	2.42	450	Field	warmed consecutively	Litter removed	Both
604	De Santo et al.	1972	Italy	Monte Taburno	Subtropical	forest	10	1.83	450	Field	warmed consecutively	Litter removed	Both
605	De Santo et al.	1976	Italy	Monte Taburno	Subtropical	forest	5	2.15	450	Field	warmed consecutively	Litter removed	Both
606	De Santo et al.	1976	Italy	Monte Taburno	Subtropical	forest	5	2.64	450	Field	warmed consecutively	Litter removed	Both
607	De Santo et al.	1976	Italy	Monte Taburno	Subtropical	forest	10	1.73	450	Field	warmed consecutively	Litter removed	Both
608	De Santo et al.	1976	Italy	Monte Taburno	Subtropical	forest	10	1.9	450	Field	warmed consecutively	Litter removed	Both
609	DeForest et al.	2006	USA	Ohio	Temperate	forest	12.5	2.97	515	Field	warmed consecutively	None	Both
610	DeLucia et al.	2003	New Zealand	Westland	Temperate	forest	15	2.21	90	Field	parallel independent samples	None	Both
611	Deng et al.	2007	China	Dinghushan	Subtropical	forest	15	1.7	910	Field	warmed consecutively	None	Both
612	Deng et al.	2007	China	Dinghushan	Subtropical	forest	15	2	910	Field	warmed consecutively	None	Both
613	Deng et al.	2007	China	Dinghushan	Subtropical	forest	15	2.2	910	Field	warmed consecutively	None	Both
614	Deng et al.	2010	China	South China Botanical Garden	Subtropical	forest	19	1.92	910	Field	warmed consecutively	CO2 added	Both
615	Deng et al.	2010	China	South China Botanical Garden	Subtropical	forest	19	1.87	910	Field	warmed consecutively	CO2 added	Both
616	Deng et al.	2010	China	South China Botanical Garden	Subtropical	forest	19	1.86	910	Field	warmed consecutively	CO2 added	Both
617	Deng et al.	2010	China	South China Botanical Garden	Subtropical	forest	19	1.57	910	Field	warmed consecutively	CO2 added	Both
618	Deng et al.	2012	China	Dinghushan Forest Ecosystem Research Station-PF	Subtropical	forest	22	2.19	1095	Field	warmed consecutively	None	Both
619	Deng et al.	2012	China	Dinghushan Forest Ecosystem Research Station-PF	Subtropical	forest	22	1.93	1095	Field	warmed consecutively	None	Both
620	Deng et al.	2012	China	Dinghushan Forest Ecosystem Research Station-MF	Subtropical	forest	22	1.74	1095	Field	warmed consecutively	None	Both
621	Deng et al.	2012	China	Dinghushan Forest Ecosystem Research Station-BF	Subtropical	forest	22	1.72	1095	Field	warmed consecutively	None	Both
622	Deng et al.	2012	China	Dinghushan Forest Ecosystem Research Station-MF	Subtropical	forest	22	1.93	1095	Field	warmed consecutively	None	Both
623	Deng et al.	2012	China	Dinghushan Forest Ecosystem Research Station-BF	Subtropical	forest	22	1.91	1095	Field	warmed consecutively	None	Both
624	Dhital et al.	2010	Japan	Takayama Experimental Field Station	Temperate	grassland	17.5	2.51	180	Field	parallel independent samples	None	Both
625	Dhital et al.	2010	Japan	Takayama Experimental Field Station	Temperate	grassland	17.5	2.08	180	Field	parallel independent samples	None	Both
626	Ding et al.	2006	China	Fengqiu State Key Agro-Ecological Experimental Station	Temperate	agriculture	26.5	1.88	79	Field	warmed consecutively	None	Both
627	Ding et al.	2006	China	Fengqiu State Key Agro-Ecological Experimental Station	Temperate	agriculture	26.5	1.88	79	Field	warmed consecutively	None	Both
628	Ding et al.	2006	China	Fengqiu State Key Agro-Ecological Experimental Station	Temperate	agriculture	26.5	1.81	102	Field	warmed consecutively	None	Both
629	Ding et al.	2006	China	Fengqiu State Key Agro-Ecological Experimental Station	Temperate	agriculture	26.5	3.08	102	Field	warmed consecutively	None	Both
630	Ding et al.	2006	China	Fengqiu State Key Agro-Ecological Experimental Station	Temperate	agriculture	26.5	1.8	102	Field	warmed consecutively	None	Both
631	Ding et al.	2006	China	Fengqiu State Key Agro-Ecological Experimental Station	Temperate	agriculture	26.5	1.28	102	Field	warmed consecutively	None	Both
632	Ding et al.	2006	China	Fengqiu State Key Agro-Ecological Experimental Station	Temperate	agriculture	26.5	1.45	102	Field	warmed consecutively	None	Both
633	Ding et al.	2006	China	Fengqiu State Key Agro-Ecological Experimental Station	Temperate	agriculture	26.5	1.57	102	Field	warmed consecutively	None	Both
634	Ding et al.	2006	China	Fengqiu State Key Agro-Ecological Experimental Station	Temperate	agriculture	26.5	1.54	79	Field	warmed consecutively	None	Both
635	Ding et al.	2006	China	Fengqiu State Key Agro-Ecological Experimental Station	Temperate	agriculture	26.5	1.55	102	Field	warmed consecutively	None	Both
636	Ding et al.	2006	China	Fengqiu State Key Agro-Ecological Experimental Station	Temperate	agriculture	26.5	1.47	79	Field	warmed consecutively	None	Both
637	Ding et al.	2006	China	Fengqiu State Key Agro-Ecological Experimental Station	Temperate	agriculture	26.5	1.74	102	Field	warmed consecutively	None	Both
638	Ding et al.	2006	China	Fengqiu State Key Agro-Ecological Experimental Station	Temperate	agriculture	26.5	1.55	102	Field	warmed consecutively	None	Both
639	Ding et al.	2006	China	Fengqiu State Key Agro-Ecological Experimental Station	Temperate	agriculture	26.5	1.49	102	Field	warmed consecutively	None	Both
640	Ding et al.	2006	China	Fengqiu State Key Agro-Ecological Experimental Station	Temperate	agriculture	26.5	1.46	104	Field	warmed consecutively	None	Both
641	Ding et al.	2006	China	Fengqiu State Key Agro-Ecological Experimental Station	Temperate	agriculture	26.5	1.64	104	Field	warmed consecutively	None	Both
642	Ding et al.	2006	China	Fengqiu State Key Agro-Ecological Experimental Station	Temperate	agriculture	26.5	1.49	104	Field	warmed consecutively	None	Both
643	Ding et al.	2007	China	Fengqiu State Key Agro-Ecological Experimental Station	Temperate	agriculture	26.5	2.37	79	Field	warmed consecutively	None	Both
644	Ding et al.	2007	China	Fengqiu State Key Agro-Ecological Experimental Station	Temperate	agriculture	26.5	3.63	79	Field	warmed consecutively	None	Both
645	Ding et al.	2007	China	Fengqiu State Key Agro-Ecological Experimental Station	Temperate	agriculture	26.5	2.12	102	Field	warmed consecutively	None	Both
646	Ding et al.	2007	China	Fengqiu State Key Agro-Ecological Experimental Station	Temperate	agriculture	26.5	2.08	79	Field	warmed consecutively	None	Both
647	Ding et al.	2007	China	Fengqiu State Key Agro-Ecological Experimental Station	Temperate	agriculture	26.5	4.1	79	Field	warmed consecutively	None	Both
648	Ding et al.	2007	China	Fengqiu State Key Agro-Ecological Experimental Station	Temperate	agriculture	26.5	1.9	104	Field	warmed consecutively	None	Both
649	Ding et al.	2007	China	Fengqiu State Key Agro-Ecological Experimental Station	Temperate	agriculture	26.5	3.22	102	Field	warmed consecutively	None	Both
650	Ding et al.	2007	China	Fengqiu State Key Agro-Ecological Experimental Station	Temperate	agriculture	26.5	2.18	102	Field	warmed consecutively	None	Both
651	Ding et al.	2007	China	Fengqiu State Key Agro-Ecological Experimental Station	Temperate	agriculture	26.5	4.34	104	Field	warmed consecutively	None	Both
652	Ding et al.	2007	China	Fengqiu State Key Agro-Ecological Experimental Station	Temperate	agriculture	26.5	2.88	79	Field	warmed consecutively	None	Both
653	Ding et al.	2007	China	Fengqiu State Key Agro-Ecological Experimental Station	Temperate	agriculture	26.5	2.42	79	Field	warmed consecutively	None	Both
654	Ding et al.	2007	China	Fengqiu State Key Agro-Ecological Experimental Station	Temperate	agriculture	26.5	2.26	102	Field	warmed consecutively	None	Both
655	Ding et al.	2007	China	Fengqiu State Key Agro-Ecological Experimental Station	Temperate	agriculture	26.5	2.52	104	Field	warmed consecutively	None	Both
656	Ding et al.	2007	China	Fengqiu State Key Agro-Ecological Experimental Station	Temperate	agriculture	26.5	3.63	104	Field	warmed consecutively	None	Both
657	Ding et al.	2007	China	Fengqiu State Key Agro-Ecological Experimental Station	Temperate	agriculture	26.5	2.18	104	Field	warmed consecutively	None	Both
658	Ding et al.	2007	China	Fengqiu State Key Agro-Ecological Experimental Station	Temperate	agriculture	26.5	2.16	104	Field	warmed consecutively	None	Both
659	Ding et al.	2007	China	Fengqiu State Key Agro-Ecological Experimental Station	Temperate	agriculture	26.5	4.1	102	Field	warmed consecutively	None	Both
660	Ding et al.	2007	China	Fengqiu State Key Agro-Ecological Experimental Station	Temperate	agriculture	26.5	1.93	104	Field	warmed consecutively	None	Both
661	Ding et al.	2007	China	Fengqiu State Key Agro-Ecological Experimental Station	Temperate	agriculture	26.5	3.49	104	Field	warmed consecutively	None	Both
662	Ding et al.	2010	China	Fengqiu State Key Agro-Ecological Experimental Station	Temperate	agriculture	26.5	1.9	102	Field	warmed consecutively	None	Both
663	Ding et al.	2010	China	Fengqiu State Key Agro-Ecological Experimental Station	Temperate	agriculture	26.5	2.12	79	Field	warmed consecutively	None	Both
664	Ding et al.	2010	China	Fengqiu State Key Agro-Ecological Experimental Station	Temperate	agriculture	26.5	2.33	79	Field	warmed consecutively	None	Both
665	Ding et al.	2010	China	Fengqiu State Key Agro-Ecological Experimental Station	Temperate	agriculture	26.5	3.04	79	Field	warmed consecutively	None	Both
666	Ding et al.	2010	China	Fengqiu State Key Agro-Ecological Experimental Station	Temperate	agriculture	26.5	2.51	102	Field	warmed consecutively	None	Both
667	Ding et al.	2010	China	Fengqiu State Key Agro-Ecological Experimental Station	Temperate	agriculture	26.5	1.99	79	Field	warmed consecutively	None	Both
668	Ding et al.	2010	China	Fengqiu State Key Agro-Ecological Experimental Station	Temperate	agriculture	26.5	2.27	79	Field	warmed consecutively	None	Both
669	Ding et al.	2010	China	Fengqiu State Key Agro-Ecological Experimental Station	Temperate	agriculture	26.5	2.53	102	Field	warmed consecutively	None	Both
670	Ding et al.	2010	China	Fengqiu State Key Agro-Ecological Experimental Station	Temperate	agriculture	26.5	3.45	104	Field	warmed consecutively	None	Both
671	Ding et al.	2010	China	Fengqiu State Key Agro-Ecological Experimental Station	Temperate	agriculture	26.5	2.99	102	Field	warmed consecutively	None	Both
672	Ding et al.	2010	China	Fengqiu State Key Agro-Ecological Experimental Station	Temperate	agriculture	26.5	2.01	104	Field	warmed consecutively	None	Both
673	Ding et al.	2010	China	Fengqiu State Key Agro-Ecological Experimental Station	Temperate	agriculture	26.5	2.33	104	Field	warmed consecutively	None	Both
674	Ding et al.	2010	China	Fengqiu State Key Agro-Ecological Experimental Station	Temperate	agriculture	26.5	2.71	104	Field	warmed consecutively	None	Both
675	Ding et al.	2010	China	Fengqiu State Key Agro-Ecological Experimental Station	Temperate	agriculture	26.5	3.81	104	Field	warmed consecutively	None	Both
676	Ding et al.	2010	China	Fengqiu State Key Agro-Ecological Experimental Station	Temperate	agriculture	26.5	3.36	104	Field	warmed consecutively	None	Both
677	Drewitt et al.	2002	Canada	Vancouver Island	Temperate	forest	7.5	2.87	30	Field	warmed consecutively	None	Both
678	Drewitt et al.	2002	Canada	Vancouver Island	Temperate	forest	7.5	2.56	30	Field	warmed consecutively	None	Both
679	Drewitt et al.	2002	Canada	Vancouver Island	Temperate	forest	7.5	2.66	30	Field	warmed consecutively	None	Both
680	Drewitt et al.	2002	Canada	Vancouver Island	Temperate	forest	7.5	1.82	30	Field	warmed consecutively	None	Both
681	Drewitt et al.	2002	Canada	Vancouver Island	Temperate	forest	7.5	1.84	30	Field	warmed consecutively	None	Both
682	Edwards et al.	1974	USA	Oak Ridge	Temperate	forest	15	4	365	Field	warmed consecutively	None	Both
683	Elberling et al.	2005	Denmark	Nodebo	Temperate	forest	10	3.73	395	Field	parallel independent samples	None	Both
684	Elberling et al.	2005	Denmark	Nodebo	Temperate	forest	10	3.45	395	Field	parallel independent samples	None	Both
685	Emmett et al.	2004	Netherland	Oldebrock	Temperate	grassland	8.5	4.2	700	Field	warmed consecutively	None	Both
686	Epron et al.	1999	France	Hesse Forest	Temperate	forest	10	3.9	515	Field	parallel independent samples	None	Both
687	Epron et al. (a)	2004	France	Hesse Forest	Temperate	forest	10	3.4	39	Field	parallel independent samples	None	Both
688	Epron et al. (b)	2004	Congo	Pointe Noire	Tropical	forest	28	3	420	Field	parallel independent samples	None	Both
689	Euskirchen et al.	2006	USA	Alberta	Temperate	forest	15	2.2	517	Field	warmed consecutively	None	Both
690	Euskirschen et al.	2003	USA	Jack pine	Temperate	forest	10	1.67	485	Field	parallel independent samples	None	Both
691	Euskirschen et al.	2003	USA	Red pine	Temperate	forest	10	1.92	485	Field	parallel independent samples	None	Both
692	Euskirschen et al.	2003	USA	Pine barrens	Temperate	forest	10	1.84	485	Field	parallel independent samples	None	Both
693	Euskirschen et al.	2003	USA	Mature hardwood	Temperate	forest	15	1.89	485	Field	parallel independent samples	None	Both
694	Euskirschen et al.	2003	USA	Clearcut	Temperate	forest	15	1.67	485	Field	parallel independent samples	None	Both
695	Euskirschen et al.	2003	USA	Young hardwood	Temperate	forest	15	2.04	485	Field	parallel independent samples	None	Both
696	Fahey et al.	2005	USA	Hubbard Brook-W6	Temperate	forest	10.5	2.57	1825	Field	warmed consecutively	None	Both
697	Fahey et al.	2005	USA	Hubbard Brook-W10	Temperate	forest	10.5	2.2	1825	Field	warmed consecutively	None	Both
698	Fahey et al.	2005	USA	Hubbard Brook-W7	Temperate	forest	10.5	2.25	1825	Field	warmed consecutively	None	Both
699	Fahey et al.	2005	USA	Hubbard Brook-W11	Temperate	forest	10.5	2.18	1825	Field	warmed consecutively	None	Both
700	Fahey et al.	2005	USA	Hubbard Brook-W12	Temperate	forest	10.5	2.05	1825	Field	warmed consecutively	None	Both
701	Fahey et al.	2005	USA	Hubbard Brook-W13	Temperate	forest	10.5	2.32	1825	Field	warmed consecutively	None	Both
702	Fahey et al.	2005	USA	Hubbard Brook-W9	Temperate	forest	10.5	2.88	1825	Field	warmed consecutively	None	Both
703	Fahey et al.	2005	USA	Hubbard Brook-W8	Temperate	forest	10.5	2.92	1825	Field	warmed consecutively	None	Both
704	Fan et al.	2012	USA	Logan	Subtropical	grassland	10	1.55	365	Field	warmed consecutively	None	Both
705	Fan et al. (a)	2015	China	Taiyue Mountain Ecosystem Research Station	Temperate	forest	10	3.19	485	Field	warmed consecutively	Organic Matter treatments	Both
706	Fan et al. (a)	2015	China	Taiyue Mountain Ecosystem Research Station	Temperate	forest	10	2.72	485	Field	warmed consecutively	Organic Matter treatments	Both
707	Fan et al. (a)	2015	China	Taiyue Mountain Ecosystem Research Station	Temperate	forest	10	2.51	485	Field	warmed consecutively	Organic Matter treatments	Both
708	Fan et al. (a)	2015	China	Taiyue Mountain Ecosystem Research Station	Temperate	forest	10	1.52	485	Field	warmed consecutively	Organic Matter treatments	Both
709	Fan et al. (a)	2015	China	Taiyue Mountain Ecosystem Research Station	Temperate	forest	10	1.36	485	Field	warmed consecutively	Organic Matter treatments	Both
710	Fan et al. (b)	2015	China	Tea Research Institute-VF	Subtropical	agriculture	15	2.401	365	Field	warmed consecutively	Litter/plants removed	Both
711	Fan et al. (b)	2015	China	Tea Research Institute-WL	Subtropical	agriculture	15	1.998	365	Field	warmed consecutively	Litter/plants removed	Both
712	Fan et al. (b)	2015	China	Tea Research Institute-LP	Subtropical	agriculture	15	1.978	365	Field	warmed consecutively	Litter/plants removed	Both
713	Fan et al. (b)	2015	China	Tea Research Institute-HP	Subtropical	agriculture	15	1.914	365	Field	warmed consecutively	Litter/plants removed	Both
714	Fan et al. (b)	2015	China	Tea Research Institute-MP	Subtropical	agriculture	15	1.859	365	Field	warmed consecutively	Litter/plants removed	Both
715	Fang and Moncrieff	2001	Scotland	Bush	Boreal	forest	30	2.9	134	Lab	warmed consecutively	Wetting	Both
716	Fang and Moncrieff	2001	Scotland	Bush	Boreal	forest	10	3.4	134	Lab	warmed consecutively	Wetting	Both
717	Fang and Moncrieff	2001	Scotland	Langhill Farmland	Temperate	agriculture	30	2.2	134	Lab	warmed consecutively	Wetting	Both
718	Fang and Moncrieff	2001	Scotland	Langhill Farmland	Temperate	agriculture	10	2.4	134	Lab	warmed consecutively	Wetting	Both
719	Fang et al.	1998	USA	Alachua County	Subtropical	forest	15	2.5	120	Field	warmed consecutively	None	Both
720	Fang et al.	2006	China	Xishuangbanna	Tropical	forest	20.5	2.18	365	Field	warmed consecutively	None	Both
721	Fang et al.	2006	China	Xishuangbanna	Tropical	forest	17.5	2.16	365	Field	warmed consecutively	None	Both
722	Fang et al.	2009	China	Dinghushan Biosphere Reserve	Subtropical	forest	22.5	2.53	365	Field	warmed consecutively	Plants cutted	Both
723	Fang et al.	2010	China	Daxinganling	Boreal	forest	2.5	3.08	1095	Field	warmed consecutively	None	Both
724	Fang et al.	2010	China	Dinghushan	Subtropical	forest	20	2.05	150	Field	warmed consecutively	None	Both
725	Fang et al.	2010	China	Changbaishan	Temperate	forest	7.5	2.61	1095	Field	warmed consecutively	None	Both
726	Fang et al.	2010	China	Xianshuangbanna	Tropical	forest	20	2.16	1095	Field	warmed consecutively	None	Both
727	Fang et al.	2012	China	Haibei alpine meadow ecosystem research station	Temperate	grassland	10	4.14	515	Field	warmed consecutively	Fertilized	Both
728	Fang et al.	2015	China	Dinghushan Biosphere Reserve-BF	Tropical	forest	15	2.588	300	Field	warmed consecutively	None	Both
729	Fang et al.	2015	China	Dinghushan Biosphere Reserve-MF	Tropical	forest	15	2.472	300	Field	warmed consecutively	None	Both
730	Fang et al.	2015	China	Dinghushan Biosphere Reserve-BF	Tropical	forest	15	1.374	300	Field	warmed consecutively	None	Both
731	Fang et al.	2015	China	Dinghushan Biosphere Reserve-MF	Tropical	forest	15	1.362	300	Field	warmed consecutively	None	Both
732	Fang et al.	2015	China	South China Botanical Garden-PF	Tropical	forest	15	2.363	300	Field	warmed consecutively	None	Both
733	Fang et al.	2015	China	South China Botanical Garden-PF	Tropical	forest	15	1.315	300	Field	warmed consecutively	None	Both
734	Fang et al.	2005	Scotland	Bush	Boreal	forest	24	2.16	108	Lab	warmed consecutively	Root-free	Heterotrophic
735	Feigl et al.	1995	Brazil	Fazenda Nova Vida	Tropical	forest	26.5	1	90	Field	warmed consecutively	None	Both
736	Feigl et al.	1995	Brazil	Fazenda Nova Vida	Tropical	grassland	26.5	1	90	Field	warmed consecutively	None	Both
737	Fenn et al.	2010	England	Wytham Woods	Temperate	forest	15	2.2	548	Field	warmed consecutively	None	Both
738	Fernandez et al.	1993	USA	Howland Forest	Temperate	forest	5	1.49	365	Field	warmed consecutively	None	Both
739	Fernandez et al.	1993	USA	Bear Brook Watershed	Temperate	forest	5	1.49	365	Field	warmed consecutively	None	Both
740	Fernandez et al.	1993	USA	Bear Brook Watershed	Temperate	forest	5	1.49	365	Field	warmed consecutively	None	Both
741	Fernandez et al.	1993	USA	Howland Forest	Temperate	forest	10	1.39	365	Field	warmed consecutively	None	Both
742	Fernandez et al.	1993	USA	Letter E Township	Temperate	forest	10	1.39	365	Field	warmed consecutively	None	Both
743	Fernandez et al.	1993	USA	Letter E Township	Temperate	forest	5	1.49	365	Field	warmed consecutively	None	Both
744	Fernandez et al.	1993	USA	Letter E Township	Temperate	forest	5	1.49	365	Field	warmed consecutively	None	Both
745	Fernandez et al.	1993	USA	Letter E Township	Temperate	forest	10	1.39	365	Field	warmed consecutively	None	Both
746	Fernandez et al.	1993	USA	Bear Brook Watershed	Temperate	forest	10	1.39	365	Field	warmed consecutively	None	Both
747	Fernandez et al.	1993	USA	Bear Brook Watershed	Temperate	forest	10	1.39	365	Field	warmed consecutively	None	Both
748	Fernandez et al.	2012	Spain	Pinus radiata stand	Temperate	forest	11.5	2.94	730	Field	warmed consecutively	None	Both
749	Fernandez et al.	2012	Spain	Pinus radiata stand	Temperate	forest	11.5	2.94	730	Field	warmed consecutively	None	Both
750	Fernandez et al.	2012	Spain	Pinus radiata stand	Temperate	forest	11.5	2.94	730	Field	warmed consecutively	None	Both
751	Fernandez et al.	2012	Spain	Pinus radiata stand	Temperate	forest	11.5	2.94	730	Field	warmed consecutively	None	Both
752	Fernandez et al.	2012	Spain	Pinus radiata stand	Temperate	forest	11.5	2.94	730	Field	warmed consecutively	None	Both
753	Fernandez et al.	2012	Spain	Pinus radiata stand	Temperate	forest	11.5	2.94	730	Field	warmed consecutively	None	Both
754	Fiener et al.	2012	Germany	Cologne	Temperate	agriculture	19	1.72	180	Field	warmed consecutively	None	Both
755	Fiener et al.	2012	Germany	Cologne	Temperate	agriculture	17	2.05	210	Field	warmed consecutively	None	Both
756	Fierer et al.	2006	USA	Bonanza Creek	Boreal	forest	20	2.4	11	Lab	warmed consecutively	Wetting	Both
757	Fierer et al.	2006	USA	Bonanza Creek	Boreal	forest	20	2.6	11	Lab	warmed consecutively	Wetting	Both
758	Fierer et al.	2006	USA	Bonanza Creek	Boreal	forest	20	2.6	11	Lab	warmed consecutively	Wetting	Both
759	Fierer et al.	2006	USA	Mojave Desert	Subtropical	grassland	20	2.9	11	Lab	warmed consecutively	Wetting	Both
760	Fierer et al.	2006	USA	Great Basin Experimental Range	Subtropical	grassland	20	3.8	11	Lab	warmed consecutively	Wetting	Both
761	Fierer et al.	2006	USA	Great Basin Experimental Range	Subtropical	grassland	20	2.9	11	Lab	warmed consecutively	Wetting	Both
762	Fierer et al.	2006	USA	Great Basin Experimental Range	Subtropical	grassland	20	2.5	11	Lab	warmed consecutively	Wetting	Both
763	Fierer et al.	2006	USA	Great Basin Experimental Range	Subtropical	grassland	20	3.2	11	Lab	warmed consecutively	Wetting	Both
764	Fierer et al.	2006	USA	Mojave Desert	Subtropical	grassland	20	2.4	11	Lab	warmed consecutively	Wetting	Both
765	Fierer et al.	2006	USA	Great Basin Experimental Range	Subtropical	grassland	20	3	11	Lab	warmed consecutively	Wetting	Both
766	Fierer et al.	2006	USA	Mojave Desert	Subtropical	grassland	20	2.3	11	Lab	warmed consecutively	Wetting	Both
767	Fierer et al.	2006	USA	Sedwick Reserve	Subtropical	forest	20	2.8	11	Lab	warmed consecutively	Wetting	Both
768	Fierer et al.	2006	USA	Sedwick Reserve	Subtropical	grassland	20	2.8	11	Lab	warmed consecutively	Wetting	Both
769	Fierer et al.	2006	USA	Santa Barbara	Subtropical	grassland	20	3	11	Lab	warmed consecutively	Wetting	Both
770	Fierer et al.	2006	USA	Calhoun Experimental Forest	Subtropical	forest	20	3	11	Lab	warmed consecutively	Wetting	Both
771	Fierer et al.	2006	USA	Calhoun Experimental Forest	Subtropical	forest	20	2.6	11	Lab	warmed consecutively	Wetting	Both
772	Fierer et al.	2006	USA	Calhoun Experimental Forest	Subtropical	forest	20	3	11	Lab	warmed consecutively	Wetting	Both
773	Fierer et al.	2006	USA	Duke Forest	Subtropical	forest	20	2.7	11	Lab	warmed consecutively	Wetting	Both
774	Fierer et al.	2006	USA	Calhoun Experimental Forest	Subtropical	forest	20	2.7	11	Lab	warmed consecutively	Wetting	Both
775	Fierer et al.	2006	USA	Duke Forest	Subtropical	forest	20	2.7	11	Lab	warmed consecutively	Wetting	Both
776	Fierer et al.	2006	USA	Duke Forest	Subtropical	forest	20	2.4	11	Lab	warmed consecutively	Wetting	Both
777	Fierer et al.	2006	USA	Sierra Nevada Mts.	Subtropical	grassland	20	2.5	11	Lab	warmed consecutively	Wetting	Both
778	Fierer et al.	2006	USA	Sierra Nevada Mts.	Subtropical	grassland	20	2.6	11	Lab	warmed consecutively	Wetting	Both
779	Fierer et al.	2006	USA	Sequoia National Park	Subtropical	grassland	20	2.6	11	Lab	warmed consecutively	Wetting	Both
780	Fierer et al.	2006	USA	Sunset Crater	Subtropical	grassland	20	3.1	11	Lab	warmed consecutively	Wetting	Both
781	Fierer et al.	2006	USA	Sunset Crater	Subtropical	forest	20	2.2	11	Lab	warmed consecutively	Wetting	Both
782	Fierer et al.	2006	USA	Coffey Ranch	Subtropical	grassland	20	4.1	11	Lab	warmed consecutively	Wetting	Both
783	Fierer et al.	2006	USA	Riesel	Subtropical	grassland	20	3.9	11	Lab	warmed consecutively	Wetting	Both
784	Fierer et al.	2006	USA	Clymer Meadow Preserve	Subtropical	grassland	20	2.7	11	Lab	warmed consecutively	Wetting	Both
785	Fierer et al.	2006	USA	Sevilleta	Subtropical	grassland	20	3.2	11	Lab	warmed consecutively	Wetting	Both
786	Fierer et al.	2006	USA	Sevilleta	Subtropical	grassland	20	3	11	Lab	warmed consecutively	Wetting	Both
787	Fierer et al.	2006	USA	Sevilleta	Subtropical	grassland	20	3.1	11	Lab	warmed consecutively	Wetting	Both
788	Fierer et al.	2006	USA	Sevilleta	Subtropical	grassland	20	2.9	11	Lab	warmed consecutively	Wetting	Both
789	Fierer et al.	2006	USA	Cedar Mtn.	Subtropical	grassland	20	4.1	11	Lab	warmed consecutively	Wetting	Both
790	Fierer et al.	2006	USA	Cedar Mtn.	Subtropical	forest	20	2.6	11	Lab	warmed consecutively	Wetting	Both
791	Fierer et al.	2006	USA	Institute for Ecosystem Studies	Temperate	grassland	20	2.6	11	Lab	warmed consecutively	Wetting	Both
792	Fierer et al.	2006	USA	Institute for Ecosystem Studies	Temperate	grassland	20	2.9	11	Lab	warmed consecutively	Wetting	Both
793	Fierer et al.	2006	USA	Institute for Ecosystem Studies	Temperate	grassland	20	3	11	Lab	warmed consecutively	Wetting	Both
794	Fierer et al.	2006	USA	Cedar Creek	Temperate	grassland	20	2.6	11	Lab	warmed consecutively	Wetting	Both
795	Fierer et al.	2006	USA	Catskills	Temperate	forest	20	3.5	11	Lab	warmed consecutively	Wetting	Both
796	Fierer et al.	2006	USA	Institute for Ecosystem Studies	Temperate	grassland	20	2.8	11	Lab	warmed consecutively	Wetting	Both
797	Fierer et al.	2006	USA	Institute for Ecosystem Studies	Temperate	grassland	20	2.9	11	Lab	warmed consecutively	Wetting	Both
798	Fierer et al.	2006	USA	Bear Brook	Temperate	forest	20	2.8	11	Lab	warmed consecutively	Wetting	Both
799	Fierer et al.	2006	USA	Bousson Forest	Temperate	forest	20	3.5	11	Lab	warmed consecutively	Wetting	Both
800	Fierer et al.	2006	USA	Bousson Forest	Temperate	forest	20	3	11	Lab	warmed consecutively	Wetting	Both
801	Fierer et al.	2006	USA	Bear Brook	Temperate	forest	20	2.7	11	Lab	warmed consecutively	Wetting	Both
802	Fierer et al.	2006	USA	Itasca Lake State Park	Temperate	forest	20	2.5	11	Lab	warmed consecutively	Wetting	Both
803	Fierer et al.	2006	USA	Itasca Lake State Park	Temperate	forest	20	2.8	11	Lab	warmed consecutively	Wetting	Both
804	Fierer et al.	2006	USA	Mary's Peak	Temperate	grassland	20	3.1	11	Lab	warmed consecutively	Wetting	Both
805	Fierer et al.	2006	USA	Great Basin Experimental Range	Temperate	grassland	20	2.9	11	Lab	warmed consecutively	Wetting	Both
806	Fierer et al.	2006	USA	Harvard Forest	Temperate	forest	20	2.8	11	Lab	warmed consecutively	Wetting	Both
807	Fierer et al.	2006	USA	Harvard Forest	Temperate	forest	20	3.4	11	Lab	warmed consecutively	Wetting	Both
808	Fierer et al.	2006	USA	Fort Collins	Temperate	forest	20	2.5	11	Lab	warmed consecutively	Wetting	Both
809	Fierer et al.	2006	USA	Valles Caldera	Temperate	grassland	20	2.9	11	Lab	warmed consecutively	Wetting	Both
810	Fierer et al.	2006	USA	Valles Caldera	Temperate	forest	20	2.8	11	Lab	warmed consecutively	Wetting	Both
811	Fierer et al.	2006	USA	Catskills	Temperate	forest	20	3.1	11	Lab	warmed consecutively	Wetting	Both
812	Fierer et al.	2006	USA	Catskills	Temperate	forest	20	3.2	11	Lab	warmed consecutively	Wetting	Both
813	Fierer et al.	2006	USA	Mary's Peak	Temperate	grassland	20	3	11	Lab	warmed consecutively	Wetting	Both
814	Fierer et al.	2006	USA	H.J. Andrews Experimental Forest	Temperate	forest	20	3.2	11	Lab	warmed consecutively	Wetting	Both
815	Fierer et al.	2006	USA	H.J. Andrews Experimental Forest	Temperate	forest	20	3.1	11	Lab	warmed consecutively	Wetting	Both
816	Fierer et al.	2006	USA	Fort Collins	Temperate	grassland	20	2.6	11	Lab	warmed consecutively	Wetting	Both
817	Fierer et al.	2006	USA	Konza Prairie	Temperate	grassland	20	2.7	11	Lab	warmed consecutively	Wetting	Both
818	Fierer et al.	2006	USA	Konza Prairie	Temperate	grassland	20	2.9	11	Lab	warmed consecutively	Wetting	Both
819	Fierer et al.	2006	USA	Konza Prairie	Temperate	grassland	20	3.9	11	Lab	warmed consecutively	Wetting	Both
820	Fierer et al.	2006	USA	Badlands National Park	Temperate	grassland	20	2.8	11	Lab	warmed consecutively	Wetting	Both
821	Fierer et al.	2006	USA	Shortgrass Steppe	Temperate	grassland	20	3	11	Lab	warmed consecutively	Wetting	Both
822	Fierer et al.	2006	USA	Kohala Peninsula	Tropical	grassland	20	4	11	Lab	warmed consecutively	Wetting	Both
823	Fierer et al.	2006	USA	Luquillo	Tropical	forest	20	3	11	Lab	warmed consecutively	Wetting	Both
824	Fierer et al.	2006	USA	Kohala Peninsula	Tropical	grassland	20	3.6	11	Lab	warmed consecutively	Wetting	Both
825	Fierer et al.	2006	USA	Luquillo	Tropical	grassland	20	3.5	11	Lab	warmed consecutively	Wetting	Both
826	Fierer et al.	2006	USA	Kohala Peninsula	Tropical	grassland	20	2.9	11	Lab	warmed consecutively	Wetting	Both
827	Fierer et al.	2006	USA	Kohala Peninsula	Tropical	grassland	20	3.1	11	Lab	warmed consecutively	Wetting	Both
828	Fierer et al.	2006	USA	Luquillo	Tropical	grassland	20	3	11	Lab	warmed consecutively	Wetting	Both
829	Fierer et al.	2003	USA	Santa Ynez Valley	Subtropical	grassland	22.5	2.8	1	Lab	warmed consecutively	Wetting	Both
830	Fierer et al.	2003	USA	Santa Ynez Valley	Subtropical	grassland	22.5	3	1	Lab	warmed consecutively	Wetting	Both
831	Finzi et al.	2014	USA	Harvard forest-Prospect Hill	Temperate	forest	12.5	3.42	365	Field	warmed consecutively	None	Both
832	Finzi et al.	2014	USA	Harvard forest-Simes	Temperate	forest	12.5	3.19	365	Field	warmed consecutively	None	Both
833	Finzi et al.	2014	USA	Harvard forest-Simes	Temperate	forest	12.5	3.04	365	Field	warmed consecutively	None	Both
834	Fleming et al.	2006	Canada	Tunnel Lake	Temperate	forest	5	4.44	1	Field	warmed consecutively	None	Both
835	Fleming et al.	2006	Canada	Tunnel Lake	Temperate	forest	5	2.9	105	Field	warmed consecutively	None	Both
836	Fleming et al.	2006	Canada	Tunnel Lake	Temperate	forest	5	2.9	105	Field	warmed consecutively	None	Both
837	Fleming et al.	2006	Canada	Tunnel Lake	Temperate	forest	5	2.31	105	Field	warmed consecutively	None	Both
838	Fleming et al.	2006	Canada	Tunnel Lake	Temperate	forest	5	2.31	105	Field	warmed consecutively	None	Both
839	Fleming et al.	2006	Canada	Tunnel Lake	Temperate	forest	5	4.44	105	Field	warmed consecutively	None	Both
840	Fleming et al.	2006	Canada	Tunnel Lake	Temperate	forest	15	2.83	105	Field	warmed consecutively	None	Both
841	Fleming et al.	2006	Canada	Tunnel Lake	Temperate	forest	15	2.83	105	Field	warmed consecutively	None	Both
842	Fleming et al.	2006	Canada	Tunnel Lake	Temperate	forest	15	2.09	105	Field	warmed consecutively	None	Both
843	Fleming et al.	2006	Canada	Tunnel Lake	Temperate	forest	15	2.09	105	Field	warmed consecutively	None	Both
844	Fleming et al.	2006	Canada	Tunnel Lake	Temperate	forest	15	1.79	105	Field	warmed consecutively	None	Both
845	Fleming et al.	2006	Canada	Tunnel Lake	Temperate	forest	15	1.79	105	Field	warmed consecutively	None	Both
846	Fortin et al.	1996	Canada	agriculture Canada Greentbelt Farm	Temperate	agriculture	15	2.19	180	Field	warmed consecutively	None	Both
847	Fortin et al.	1996	Canada	agriculture Canada Greentbelt Farm	Temperate	agriculture	15	2.14	180	Field	warmed consecutively	None	Both
848	Fortin et al.	1996	Canada	agriculture Canada Greentbelt Farm	Temperate	agriculture	10	3.96	180	Field	warmed consecutively	None	Both
849	Fortin et al.	1996	Canada	agriculture Canada Greentbelt Farm	Temperate	agriculture	10	3.67	180	Field	warmed consecutively	None	Both
850	Franck et al.	2011	Chile	Cerrillos de Tamaya	Subtropical	agriculture	19	2.5	365	Field	warmed consecutively	None	Both
851	Franck et al.	2011	Chile	Cerrillos de Tamaya	Subtropical	agriculture	19	1.6	365	Field	warmed consecutively	Trenching	Both
852	Franck et al.	2011	Chile	Cerrillos de Tamaya	Subtropical	agriculture	19	1.96	365	Field	warmed consecutively	Girdling	Both
853	Frank et al.	2002	USA	USDA Northern Great Plains Research Laboratory	Temperate	grassland	15	2.7	2190	Field	parallel independent samples	None	Both
854	Frank et al.	2006	USA	Northern Great Plains Research Laboratory	Temperate	grassland	5	4.25	365	Field	parallel independent samples	None	Both
855	Frank et al.	2006	USA	Northern Great Plains Research Laboratory	Temperate	grassland	5	1.76	365	Field	parallel independent samples	None	Both
856	Frank et al.	2006	USA	Northern Great Plains Research Laboratory	Temperate	grassland	10	2.74	365	Field	parallel independent samples	None	Both
857	Frank et al.	2006	USA	Northern Great Plains Research Laboratory	Temperate	grassland	10	2.24	365	Field	parallel independent samples	None	Both
858	Froment et al.	1972	Belgium	Blois de Blaimont	Temperate	forest	5	3.53	1000	Field	warmed consecutively	None	Both
859	Gao et al.	2013	China	Quzhoi Experimental Station	Temperate	agriculture	15	1.712	540	Field	parallel independent samples	Fertilized	Both
860	Gao et al.	2013	China	Quzhoi Experimental Station	Temperate	agriculture	15	1.568	540	Field	parallel independent samples	Fertilized	Both
861	Gao et al.	2013	China	Quzhoi Experimental Station	Temperate	agriculture	15	1.54	540	Field	parallel independent samples	Fertilized	Both
862	Gao et al.	2013	China	Quzhoi Experimental Station	Temperate	agriculture	15	1.437	540	Field	parallel independent samples	Fertilized	Both
863	Gaumont-Guay et al.	2008	Canada	Prince Albert National Park	Boreal	forest	2.5	3.5	365	Field	warmed consecutively	None	Heterotrophic
864	Gaumont-Guay et al.	2008	Canada	Prince Albert National Park	Boreal	forest	2.5	3	365	Field	warmed consecutively	None	Heterotrophic
865	Gaumont-Guay et al.	2008	Canada	Prince Albert National Park	Boreal	forest	2.5	4	365	Field	warmed consecutively	None	Heterotrophic
866	Gaumont-Guay et al.	2009	Canada	Prince Albert National Park	Boreal	forest	1.5	3.2	365	Field	parallel independent samples	None	Both
867	Gaumont-Guay et al.	2009	Canada	Prince Albert National Park	Boreal	forest	1.5	3.2	365	Field	parallel independent samples	None	Both
868	Gaumont-Guay et al.	2009	Canada	Prince Albert National Park	Boreal	forest	5.5	2.5	365	Field	parallel independent samples	None	Both
869	Gaumont-Guay et al. (a)	2006	Canada	BOREAS SSA-OA	Boreal	forest	10	3.8	365	Field	warmed consecutively	None	Both
870	Gaumont-Guay et al. (b)	2006	Canada	BOREAS SSA-OA	Boreal	forest	10	3.6	1095	Field	warmed consecutively	None	Both
871	Gaumont-Guay et al. (b)	2006	Canada	BOREAS SSA-OA	Boreal	forest	10	3.3	1095	Field	warmed consecutively	None	Both
872	Geng et al.	2011	China	Inner Mongolia grassland Ecosystem Research Station	Temperate	grassland	21.5	1.7	5	Field	warmed consecutively	None	Both
873	Gershenson et al.	2009	USA	Santa Cruz	Subtropical	grassland	5	2.9	0.04	Lab	parallel independent samples	Glucose added	Both
874	Gershenson et al.	2009	USA	Santa Cruz	Subtropical	grassland	5	3.99	0.04	Lab	parallel independent samples	Glucose added	Both
875	Gershenson et al.	2009	USA	Santa Cruz	Subtropical	forest	5	3.39	0.04	Lab	parallel independent samples	Glucose added	Both
876	Gershenson et al.	2009	USA	Santa Cruz	Subtropical	forest	5	4.46	0.04	Lab	parallel independent samples	Glucose added	Both
877	Gershenson et al.	2009	USA	Santa Cruz	Subtropical	agriculture	16	1.83	0.04	Lab	parallel independent samples	Glucose added	Both
878	Gershenson et al.	2009	USA	Santa Cruz	Subtropical	agriculture	16	2.47	0.04	Lab	parallel independent samples	Glucose added	Both
879	Gershenson et al.	2009	USA	Santa Cruz	Subtropical	grassland	16	2.49	0.04	Lab	parallel independent samples	Glucose added	Both
880	Gershenson et al.	2009	USA	Santa Cruz	Subtropical	grassland	16	2.6	0.04	Lab	parallel independent samples	Glucose added	Both
881	Gershenson et al.	2009	USA	Santa Cruz	Subtropical	forest	16	2.11	0.04	Lab	parallel independent samples	Glucose added	Both
882	Gershenson et al.	2009	USA	Santa Cruz	Subtropical	forest	16	2.4	0.04	Lab	parallel independent samples	Glucose added	Both
883	Gershenson et al.	2009	USA	Santa Cruz	Subtropical	agriculture	26	1.69	0.04	Lab	parallel independent samples	Glucose added	Both
884	Gershenson et al.	2009	USA	Santa Cruz	Subtropical	agriculture	26	1.78	0.04	Lab	parallel independent samples	Glucose added	Both
885	Gershenson et al.	2009	USA	Santa Cruz	Subtropical	grassland	26	1.4	0.04	Lab	parallel independent samples	Glucose added	Both
886	Gershenson et al.	2009	USA	Santa Cruz	Subtropical	grassland	26	1.61	0.04	Lab	parallel independent samples	Glucose added	Both
887	Gershenson et al.	2009	USA	Santa Cruz	Subtropical	forest	26	1.71	0.04	Lab	parallel independent samples	Glucose added	Both
888	Gershenson et al.	2009	USA	Santa Cruz	Subtropical	forest	26	1.67	0.04	Lab	parallel independent samples	Glucose added	Both
889	Gillabel et al.	2010	Belgium	Termunck	Temperate	agriculture	30	1.9	176	Lab	parallel independent samples	Wetting	Heterotrophic
890	Gillabel et al.	2010	Belgium	Termunck	Temperate	agriculture	30	3.8	176	Lab	parallel independent samples	Wetting	Heterotrophic
891	Gillabel et al.	2010	Belgium	Termunck	Temperate	agriculture	30	2.8	176	Lab	parallel independent samples	Wetting	Heterotrophic
892	Gough et al.	2004	USA	Gough-1	Subtropical	forest	20	2.14	913	Field	warmed consecutively	None	Both
893	Gough et al.	2004	USA	Gough-2	Subtropical	forest	20	2.14	913	Field	warmed consecutively	None	Both
894	Gough et al.	2004	USA	Gough-3	Subtropical	forest	20	2.14	913	Field	warmed consecutively	None	Both
895	Gough et al.	2004	USA	Gough-4	Subtropical	forest	20	2.14	485	Field	warmed consecutively	None	Both
896	Gough et al.	2005	USA	Buckingham-10	Subtropical	forest	10	3.1	365	Field	warmed consecutively	None	Both
897	Gough et al.	2005	USA	Buckingham-1	Subtropical	forest	5	3.33	365	Field	warmed consecutively	None	Both
898	Gough et al.	2005	USA	Gough-SC	Subtropical	forest	15	2.25	485	Field	warmed consecutively	None	Both
899	Gough et al.	2005	USA	Gough-SC	Subtropical	forest	15	2.25	485	Field	warmed consecutively	None	Both
900	Gough et al.	2005	USA	Gough-SC	Subtropical	forest	15	2.25	485	Field	warmed consecutively	None	Both
901	Gough et al.	2005	USA	Buckingham-1	Subtropical	forest	15	2.8	365	Field	warmed consecutively	None	Both
902	Gough et al.	2005	USA	Buckingham-20	Subtropical	forest	15	2.41	365	Field	warmed consecutively	None	Both
903	Gough et al.	2005	USA	Buckingham-10	Subtropical	forest	15	2.26	365	Field	warmed consecutively	None	Both
904	Gough et al.	2005	USA	Gough-SC	Subtropical	forest	10	3.88	485	Field	warmed consecutively	None	Both
905	Gough et al.	2005	USA	Gough-SC	Subtropical	forest	10	3.88	485	Field	warmed consecutively	None	Both
906	Gough et al.	2005	USA	Gough-SC	Subtropical	forest	10	3.88	485	Field	warmed consecutively	None	Both
907	Gough et al.	2005	USA	Buckingham-20	Subtropical	forest	10	3.8	365	Field	warmed consecutively	None	Both
908	Gough et al.	2007	USA	University of Michigan Biological Station	Temperate	forest	12.5	1.98	210	Field	warmed consecutively	None	Both
909	Gough et al.	2007	USA	University of Michigan Biological Station	Temperate	forest	12.5	1.72	210	Field	warmed consecutively	None	Both
910	Gough et al.	2007	USA	University of Michigan Biological Station	Temperate	forest	12.5	1.95	210	Field	warmed consecutively	None	Both
911	Gough et al.	2007	USA	University of Michigan Biological Station	Temperate	forest	12.5	1.9	210	Field	warmed consecutively	None	Both
912	Gough et al.	2007	USA	University of Michigan Biological Station	Temperate	forest	12.5	1.48	210	Field	warmed consecutively	None	Both
913	Gough et al.	2007	USA	University of Michigan Biological Station	Temperate	forest	12.5	2.87	210	Field	warmed consecutively	None	Both
914	Gough et al.	2007	USA	University of Michigan Biological Station	Temperate	forest	12.5	2.92	210	Field	warmed consecutively	None	Both
915	Gough et al.	2007	USA	University of Michigan Biological Station	Temperate	forest	12.5	3.38	210	Field	warmed consecutively	None	Both
916	Gough et al.	2007	USA	University of Michigan Biological Station	Temperate	forest	12.5	2.16	210	Field	warmed consecutively	None	Both
917	Gough et al.	2007	USA	University of Michigan Biological Station	Temperate	forest	12.5	1.61	210	Field	warmed consecutively	None	Both
918	Gough et al.	2007	USA	University of Michigan Biological Station	Temperate	forest	12.5	1.61	210	Field	warmed consecutively	None	Both
919	Gough et al.	2007	USA	University of Michigan Biological Station	Temperate	forest	12.5	1.74	210	Field	warmed consecutively	None	Both
920	Gough et al.	2007	USA	University of Michigan Biological Station	Temperate	forest	12.5	1.6	210	Field	warmed consecutively	None	Both
921	Gough et al.	2007	USA	University of Michigan Biological Station	Temperate	forest	12.5	3.88	210	Field	warmed consecutively	None	Both
922	Gough et al.	2007	USA	University of Michigan Biological Station	Temperate	forest	12.5	2.98	210	Field	warmed consecutively	None	Both
923	Goulden and Crill	1997	Canada	BOREAS Study Area	Boreal	forest	7	2	35	Field	warmed consecutively	None	Both
924	Grisi et al.	1998	Brazil	Mata	Subtropical	forest	25	2.2	150	Lab	parallel independent samples	Wetting/NaOH	Both
925	Grisi et al.	1998	England	Fosters	Temperate	grassland	25	2.1	150	Lab	parallel independent samples	Wetting/NaOH	Both
926	Grisi et al.	1998	England	Silsoe	Temperate	agriculture	25	1.7	150	Lab	parallel independent samples	Wetting/NaOH	Both
927	Grisi et al.	1998	England	Woburn	Temperate	grassland	25	1.4	150	Lab	parallel independent samples	Wetting/NaOH	Both
928	Grisi et al.	1998	Brazil	Jaiba	Tropical	agriculture	25	1.9	150	Lab	parallel independent samples	Wetting/NaOH	Both
929	Grisi et al.	1998	Brazil	Cerrado	Tropical	agriculture	25	1.9	150	Lab	parallel independent samples	Wetting/NaOH	Both
930	Grogan et al.	1999	USA	Fairbanks	Boreal	forest	-2.5	3.3	270	Field	warmed consecutively	None	Both
931	Grünzweig et al.	2003	USA	Delta Junction; Fairbanks; Two Rivers	Boreal	grassland	10	3.16	635	Field	warmed consecutively	None	Both
932	Grünzweig et al.	2009	Israel	Yatir Forest	Subtropical	forest	20	2.45	2190	Field	warmed consecutively	Wetting	Both
933	Guelland et al.	2013	Switzerland	Damma glacier	Boreal	grassland	12.5	4.5	360	Field	warmed consecutively	None	Both
934	Guelland et al.	2013	Switzerland	Damma glacier	Boreal	grassland	12.5	3.4	360	Field	warmed consecutively	None	Both
935	Guelland et al.	2013	Switzerland	Damma glacier	Boreal	grassland	12.5	3.4	360	Field	warmed consecutively	None	Both
936	Guidolotti et al.	2013	Italy	Selva Piana	Temperate	forest	5.5	3.36	420	Field	warmed consecutively	None	Both
937	Guntinas et al.	2013	Spain	Forest	Temperate	forest	20	3.5	42	Lab	warmed consecutively	Wetting	Heterotrophic
938	Guntinas et al.	2013	Spain	Forest	Temperate	forest	20	3.01	42	Lab	warmed consecutively	Wetting	Heterotrophic
939	Guntinas et al.	2013	Spain	Forest	Temperate	forest	20	2.93	42	Lab	warmed consecutively	Wetting	Heterotrophic
940	Guntinas et al.	2013	Spain	Forest	Temperate	forest	20	2.81	42	Lab	warmed consecutively	Wetting	Heterotrophic
941	Guntinas et al.	2013	Spain	grassland	Temperate	grassland	20	3.45	42	Lab	warmed consecutively	Wetting	Heterotrophic
942	Guntinas et al.	2013	Spain	grassland	Temperate	grassland	20	2.62	42	Lab	warmed consecutively	Wetting	Heterotrophic
943	Guntinas et al.	2013	Spain	grassland	Temperate	grassland	20	2.46	42	Lab	warmed consecutively	Wetting	Heterotrophic
944	Guntinas et al.	2013	Spain	grassland	Temperate	grassland	20	2.39	42	Lab	warmed consecutively	Wetting	Heterotrophic
945	Guntinas et al.	2013	Spain	Cropland	Temperate	agriculture	20	2.88	42	Lab	warmed consecutively	Wetting	Heterotrophic
946	Guntinas et al.	2013	Spain	Cropland	Temperate	agriculture	20	2.94	42	Lab	warmed consecutively	Wetting	Heterotrophic
947	Guntinas et al.	2013	Spain	Cropland	Temperate	agriculture	20	2.7	42	Lab	warmed consecutively	Wetting	Heterotrophic
948	Guo et al.	2010	China	Yizhou State Forestry Centre	Subtropical	forest	20	1.3	790	Field	parallel independent samples	None	Both
949	Guo et al.	2010	China	Yizhou State Forestry Centre	Subtropical	forest	20	1.2	790	Field	parallel independent samples	Clear-Cut	Both
950	Guo et al.	2010	China	Yizhou State Forestry Centre	Subtropical	forest	20	1.46	790	Field	parallel independent samples	Slash Burnt	Both
951	Guo et al.	2010	China	Yizhou State Forestry Centre	Subtropical	forest	20	1.95	790	Field	parallel independent samples	All	Both
952	Guo et al.	2010	China	Yizhou State Forestry Centre	Subtropical	forest	20	1.5	790	Field	parallel independent samples	None	Both
953	Guo et al.	2010	China	Yizhou State Forestry Centre	Subtropical	forest	20	1.23	790	Field	parallel independent samples	Clear-Cut	Both
954	Guo et al.	2010	China	Yizhou State Forestry Centre	Subtropical	forest	20	1.14	790	Field	parallel independent samples	Slash Burnt	Both
955	Guo et al.	2010	China	Yizhou State Forestry Centre	Subtropical	forest	20	1.31	790	Field	parallel independent samples	All	Both
956	Guo et al.	2010	China	Yizhou State Forestry Centre	Subtropical	forest	20	1.6	790	Field	parallel independent samples	None	Both
957	Guo et al.	2010	China	Yizhou State Forestry Centre	Subtropical	forest	20	1.31	790	Field	parallel independent samples	Clear-Cut	Both
958	Guo et al.	2010	China	Yizhou State Forestry Centre	Subtropical	forest	20	1.31	790	Field	parallel independent samples	Slash Burnt	Both
959	Guo et al.	2010	China	Yizhou State Forestry Centre	Subtropical	forest	20	1.38	790	Field	parallel independent samples	All	Both
960	Guo et al.	2010	China	Yizhou State Forestry Centre	Subtropical	forest	20	1.57	790	Field	parallel independent samples	None	Both
961	Guo et al.	2010	China	Yizhou State Forestry Centre	Subtropical	forest	20	1.15	790	Field	parallel independent samples	Clear-Cut	Both
962	Guo et al.	2010	China	Yizhou State Forestry Centre	Subtropical	forest	20	1.08	790	Field	parallel independent samples	Slash Burnt	Both
963	Guo et al.	2010	China	Yizhou State Forestry Centre	Subtropical	forest	20	1.26	790	Field	parallel independent samples	All	Both
964	Guo et al.	2010	China	Yizhou State Forestry Centre	Subtropical	forest	20	1.63	790	Field	parallel independent samples	None	Both
965	Guo et al.	2010	China	Yizhou State Forestry Centre	Subtropical	forest	20	1.6	790	Field	parallel independent samples	Clear-Cut	Both
966	Guo et al.	2010	China	Yizhou State Forestry Centre	Subtropical	forest	20	1.72	790	Field	parallel independent samples	Slash Burnt	Both
967	Guo et al.	2010	China	Yizhou State Forestry Centre	Subtropical	forest	20	2.08	790	Field	parallel independent samples	All	Both
968	Guo et al.	2010	China	Yizhou State Forestry Centre	Subtropical	forest	20	1.35	790	Field	parallel independent samples	None	Both
969	Guo et al.	2010	China	Yizhou State Forestry Centre	Subtropical	forest	20	1.21	790	Field	parallel independent samples	Clear-Cut	Both
970	Guo et al.	2010	China	Yizhou State Forestry Centre	Subtropical	forest	20	1.49	790	Field	parallel independent samples	Slash Burnt	Both
971	Guo et al.	2010	China	Yizhou State Forestry Centre	Subtropical	forest	20	1.67	790	Field	parallel independent samples	All	Both
972	Guo et al.	2010	China	Yizhou State Forestry Centre	Subtropical	forest	20	1.32	790	Field	parallel independent samples	None	Both
973	Guo et al.	2010	China	Yizhou State Forestry Centre	Subtropical	forest	20	1.35	790	Field	parallel independent samples	Clear-Cut	Both
974	Guo et al.	2010	China	Yizhou State Forestry Centre	Subtropical	forest	20	2.11	790	Field	parallel independent samples	Slash Burnt	Both
975	Guo et al.	2010	China	Yizhou State Forestry Centre	Subtropical	forest	20	1.79	790	Field	parallel independent samples	All	Both
976	Guo et al.	2010	China	Yizhou State Forestry Centre	Subtropical	forest	20	1.49	790	Field	parallel independent samples	None	Both
977	Guo et al.	2010	China	Yizhou State Forestry Centre	Subtropical	forest	20	1.68	790	Field	parallel independent samples	Clear-Cut	Both
978	Guo et al.	2010	China	Yizhou State Forestry Centre	Subtropical	forest	20	2.14	790	Field	parallel independent samples	Slash Burnt	Both
979	Guo et al.	2010	China	Yizhou State Forestry Centre	Subtropical	forest	20	1.4	790	Field	parallel independent samples	All	Both
980	Haddix et al.	2011	USA	Vernon	Subtropical	agriculture	20	1.81	595	Lab	parallel independent samples	Wetting	Heterotrophic
981	Haddix et al.	2011	USA	Vernon	Subtropical	grassland	20	1.56	595	Lab	parallel independent samples	Wetting	Heterotrophic
982	Haddix et al.	2011	USA	Vernon	Subtropical	grassland	30	1.63	595	Lab	parallel independent samples	Wetting	Heterotrophic
983	Haddix et al.	2011	USA	Vernon	Subtropical	agriculture	30	1.6	595	Lab	parallel independent samples	Wetting	Heterotrophic
984	Haddix et al.	2011	USA	Vernon	Subtropical	grassland	30	2	595	Lab	parallel independent samples	Wetting	Heterotrophic
985	Haddix et al.	2011	USA	Vernon	Subtropical	agriculture	30	3.1	595	Lab	parallel independent samples	Wetting	Heterotrophic
986	Haddix et al.	2011	USA	Vernon	Subtropical	grassland	30	3.4	595	Lab	parallel independent samples	Wetting	Heterotrophic
987	Haddix et al.	2011	USA	Vernon	Subtropical	agriculture	30	1.49	595	Lab	parallel independent samples	Wetting	Heterotrophic
988	Haddix et al.	2011	USA	Mandan	Temperate	grassland	30	1.7	595	Lab	parallel independent samples	Wetting	Heterotrophic
989	Haddix et al.	2011	USA	Mandan	Temperate	agriculture	30	1.3	595	Lab	parallel independent samples	Wetting	Heterotrophic
990	Haddix et al.	2011	USA	Mandan	Temperate	grassland	30	2.7	595	Lab	parallel independent samples	Wetting	Heterotrophic
991	Haddix et al.	2011	USA	Mandan	Temperate	agriculture	30	1.23	595	Lab	parallel independent samples	Wetting	Heterotrophic
992	Haddix et al.	2011	USA	Mandan	Temperate	grassland	30	1.85	595	Lab	parallel independent samples	Wetting	Heterotrophic
993	Haddix et al.	2011	USA	Akron	Temperate	agriculture	20	1.76	595	Lab	parallel independent samples	Wetting	Heterotrophic
994	Haddix et al.	2011	USA	Akron	Temperate	grassland	20	1.86	595	Lab	parallel independent samples	Wetting	Heterotrophic
995	Haddix et al.	2011	Canada	Indian Head	Temperate	agriculture	20	1.79	595	Lab	parallel independent samples	Wetting	Heterotrophic
996	Haddix et al.	2011	Canada	Indian Head	Temperate	grassland	20	1.6	595	Lab	parallel independent samples	Wetting	Heterotrophic
997	Haddix et al.	2011	USA	Mandan	Temperate	agriculture	20	1.77	595	Lab	parallel independent samples	Wetting	Heterotrophic
998	Haddix et al.	2011	USA	Mandan	Temperate	grassland	20	2.07	595	Lab	parallel independent samples	Wetting	Heterotrophic
999	Haddix et al.	2011	USA	Akron	Temperate	agriculture	30	2.2	595	Lab	parallel independent samples	Wetting	Heterotrophic
1000	Haddix et al.	2011	USA	Akron	Temperate	grassland	30	1.5	595	Lab	parallel independent samples	Wetting	Heterotrophic
1001	Haddix et al.	2011	USA	Akron	Temperate	grassland	30	2.8	595	Lab	parallel independent samples	Wetting	Heterotrophic
1002	Haddix et al.	2011	USA	Akron	Temperate	agriculture	30	1.84	595	Lab	parallel independent samples	Wetting	Heterotrophic
1003	Haddix et al.	2011	USA	Akron	Temperate	grassland	30	1.68	595	Lab	parallel independent samples	Wetting	Heterotrophic
1004	Haddix et al.	2011	Canada	Indian Head	Temperate	agriculture	30	2	595	Lab	parallel independent samples	Wetting	Heterotrophic
1005	Haddix et al.	2011	Canada	Indian Head	Temperate	grassland	30	1.6	595	Lab	parallel independent samples	Wetting	Heterotrophic
1006	Haddix et al.	2011	Canada	Indian Head	Temperate	agriculture	30	3.3	595	Lab	parallel independent samples	Wetting	Heterotrophic
1007	Haddix et al.	2011	Canada	Indian Head	Temperate	grassland	30	2.5	595	Lab	parallel independent samples	Wetting	Heterotrophic
1008	Haddix et al.	2011	Canada	Indian Head	Temperate	agriculture	30	1.69	595	Lab	parallel independent samples	Wetting	Heterotrophic
1009	Haddix et al.	2011	Canada	Indian Head	Temperate	grassland	30	1.38	595	Lab	parallel independent samples	Wetting	Heterotrophic
1010	Haddix et al.	2011	USA	Mandan	Temperate	agriculture	30	1.5	595	Lab	parallel independent samples	Wetting	Heterotrophic
1011	Haddix et al.	2011	Costa Rica	Alajuela	Tropical	grassland	30	2.9	595	Lab	parallel independent samples	Wetting	Heterotrophic
1012	Haddix et al.	2011	Costa Rica	Alajuela	Tropical	grassland	30	2.11	595	Lab	parallel independent samples	Wetting	Heterotrophic
1013	Haddix et al.	2011	Brazil	Rondonia	Tropical	forest	30	2.2	595	Lab	parallel independent samples	Wetting	Heterotrophic
1014	Haddix et al.	2011	Brazil	Rondonia	Tropical	grassland	30	2.4	595	Lab	parallel independent samples	Wetting	Heterotrophic
1015	Haddix et al.	2011	Brazil	Rondonia	Tropical	forest	30	1.4	595	Lab	parallel independent samples	Wetting	Heterotrophic
1016	Haddix et al.	2011	Brazil	Rondonia	Tropical	grassland	30	4.2	595	Lab	parallel independent samples	Wetting	Heterotrophic
1017	Haddix et al.	2011	Brazil	Rondonia	Tropical	forest	20	2.06	595	Lab	parallel independent samples	Wetting	Heterotrophic
1018	Haddix et al.	2011	Brazil	Rondonia	Tropical	grassland	20	1.58	595	Lab	parallel independent samples	Wetting	Heterotrophic
1019	Haddix et al.	2011	Costa Rica	Alajuela	Tropical	forest	20	2.06	595	Lab	parallel independent samples	Wetting	Heterotrophic
1020	Haddix et al.	2011	Costa Rica	Alajuela	Tropical	grassland	20	2.08	595	Lab	parallel independent samples	Wetting	Heterotrophic
1021	Haddix et al.	2011	Costa Rica	Alajuela	Tropical	forest	30	1.9	595	Lab	parallel independent samples	Wetting	Heterotrophic
1022	Haddix et al.	2011	Costa Rica	Alajuela	Tropical	forest	30	4.1	595	Lab	parallel independent samples	Wetting	Heterotrophic
1023	Haddix et al.	2011	Costa Rica	Alajuela	Tropical	forest	30	2.3	595	Lab	parallel independent samples	Wetting	Heterotrophic
1024	Haddix et al.	2011	Brazil	Rondonia	Tropical	grassland	30	2.03	595	Lab	parallel independent samples	Wetting	Heterotrophic
1025	Haddix et al.	2011	Brazil	Rondonia	Tropical	forest	30	1.65	595	Lab	parallel independent samples	Wetting	Heterotrophic
1026	Hagedorn et al.	2010	Switzerland	Stillberg	Temperate	forest	5	2.5	270	Field	warmed consecutively	None	Both
1027	Hagedorn et al.	2010	Switzerland	Stillberg	Temperate	forest	5	2.6	270	Field	warmed consecutively	None	Both
1028	Hall et al.	1990	Australia	Institute for Irrigation and Salinity Research	Subtropical	agriculture	23	2.4	50	Field	warmed consecutively	wetting	Both
1029	Hamdi et al.	2011	Tunisia	Sidi Ahmed Esaleh	Subtropical	agriculture	25	2.05	56	Lab	parallel independent samples	wetting	Heterotrophic
1030	Hamdi et al.	2011	Tunisia	Sidi Ahmed Esaleh	Subtropical	agriculture	35	2.15	56	Lab	parallel independent samples	wetting	Heterotrophic
1031	Hamdi et al.	2011	Tunisia	Sidi Ahmed Esaleh	Subtropical	agriculture	45	1.92	56	Lab	parallel independent samples	wetting	Heterotrophic
1032	Han et al.	2006	China	Sichuan Basin	Subtropical	agriculture	26.5	2.04	180	Field	warmed consecutively	None	Both
1033	Han et al.	2012	China	Yellow River Delta Ecological Research Station of Coastal Wetland	Temperate	wetland	6.5	2.34	180	Field	parallel independent samples	None	Both
1034	Han et al.	2012	China	Yellow River Delta Ecological Research Station of Coastal Wetland	Temperate	wetland	6.5	1.1	180	Field	parallel independent samples	None	Both
1035	Han et al.	2012	China	Yellow River Delta Ecological Research Station of Coastal Wetland	Temperate	wetland	6.5	2.39	180	Field	parallel independent samples	None	Both
1036	Han et al.	2013	China	National Field Research Station of Agro-Ecosystem	Temperate	grassland	7.5	2.27	365	Field	warmed consecutively	None	Both
1037	Han et al.	2013	China	National Field Research Station of Agro-Ecosystem	Temperate	agriculture	7.5	2.248	365	Field	warmed consecutively	None	Both
1038	Han et al.	2013	China	National Field Research Station of Agro-Ecosystem	Temperate	grassland	7.5	2.075	365	Field	warmed consecutively	None	Both
1039	Han et al.	2013	China	National Field Research Station of Agro-Ecosystem	Temperate	agriculture	7.5	1.665	365	Field	warmed consecutively	None	Both
1040	Han et al.	2013	China	National Field Research Station of Agro-Ecosystem	Temperate	agriculture	7.5	1.537	365	Field	warmed consecutively	None	Both
1041	Han et al.	2015	China	Dinghushan Biosphere Reserve-MF	Tropical	forest	15	2.588	900	Field	warmed consecutively	None	Both
1042	Han et al.	2015	China	Dinghushan Biosphere Reserve-MF	Tropical	forest	15	2.472	900	Field	warmed consecutively	None	Both
1043	Han et al.	2015	China	Dinghushan Biosphere Reserve-MF	Tropical	forest	15	1.374	900	Field	warmed consecutively	None	Both
1044	Han et al.	2015	China	Dinghushan Biosphere Reserve-MF	Tropical	forest	15	1.362	900	Field	warmed consecutively	None	Both
1045	Han et al.	2015	China	Dinghushan Biosphere Reserve-MF	Tropical	forest	15	1.281	900	Field	warmed consecutively	None	Both
1046	Han et al.	2015	China	Dinghushan Biosphere Reserve-MF	Tropical	forest	15	1.166	900	Field	warmed consecutively	None	Both
1047	Han et al.	2015	China	South China Botanical Garden-PF	Tropical	forest	15	2.363	900	Field	warmed consecutively	None	Both
1048	Han et al.	2015	China	South China Botanical Garden-PF	Tropical	forest	15	1.315	900	Field	warmed consecutively	None	Both
1049	Han et al.	2015	China	South China Botanical Garden-PF	Tropical	forest	15	1.219	900	Field	warmed consecutively	None	Both
1050	Han et al.	2015	China	Dinghushan Biosphere Reserve	Subtropical	forest	19.5	1.42	913	Field	warmed consecutively	Litter removed	Both
1051	Han et al.	2015	China	Dinghushan Biosphere Reserve	Subtropical	forest	19.5	1.46	913	Field	warmed consecutively	None	Both
1052	Han et al.	2015	China	Dinghushan Biosphere Reserve	Subtropical	forest	20.5	1.57	913	Field	warmed consecutively	Litter added	Both
1053	Han et al.	2015	China	Dinghushan Biosphere Reserve	Subtropical	forest	20.5	1.51	913	Field	warmed consecutively	Litter removed	Both
1054	Han et al.	2015	China	Dinghushan Biosphere Reserve	Subtropical	forest	20.5	1.46	913	Field	warmed consecutively	None	Both
1055	Han et al.	2015	China	Dinghushan Biosphere Reserve	Subtropical	forest	21.5	1.31	913	Field	warmed consecutively	None	Both
1056	Han et al.	2015	China	Dinghushan Biosphere Reserve	Subtropical	forest	21.5	1.39	913	Field	warmed consecutively	Litter added	Both
1057	Han et al.	2015	China	Dinghushan Biosphere Reserve	Subtropical	forest	21.5	1.22	913	Field	warmed consecutively	Litter removed	Both
1058	Han et al.	2015	China	Dinghushan Biosphere Reserve	Subtropical	forest	19.5	1.72	913	Field	warmed consecutively	Litter added	Both
1059	Harper et al.	2005	USA	Konza Prairie	Temperate	grassland	22	2	300	Field	parallel independent samples	None	Both
1060	Harper et al.	2005	USA	Konza Prairie	Temperate	grassland	22	2.22	300	Field	parallel independent samples	None	Both
1061	Harper et al.	2005	USA	Konza Prairie	Temperate	grassland	22	2.12	300	Field	parallel independent samples	None	Both
1062	Harper et al.	2005	USA	Konza Prairie	Temperate	grassland	22	2.06	300	Field	parallel independent samples	None	Both
1063	Hartley and Ineson	2008	UK	York	Temperate	agriculture	15	3.14	87	Lab	warmed consecutively	wetting	Both
1064	Hartley and Ineson	2008	UK	York	Temperate	agriculture	15	3.06	7	Lab	warmed consecutively	wetting	Both
1065	Hartley and Ineson	2008	UK	York	Temperate	agriculture	15	3.03	50	Lab	warmed consecutively	wetting	Both
1066	Hartley and Ineson	2008	UK	York	Temperate	agriculture	15	3.25	124	Lab	warmed consecutively	wetting	Both
1067	Hartley et al.	2008	Sweden	Abisko	Boreal	forest	6	4.25	205	Lab	warmed consecutively	wetting	Both
1068	Hartley et al.	2008	Sweden	Abisko	Boreal	forest	6	3.8	200	Lab	warmed consecutively	wetting	Both
1069	Hartley et al.	2008	Sweden	Abisko	Boreal	forest	4	4.35	205	Lab	warmed consecutively	wetting	Both
1070	Hartley et al.	2008	Sweden	Abisko	Boreal	forest	8	3.58	200	Lab	warmed consecutively	wetting	Both
1071	Hashimoto et al.	2007	Japan	University of Tokyo Forest, Fukuroyamasawa	Subtropical	forest	15	2.46	730	Field	warmed consecutively	None	Both
1072	Hashimoto et al.	2008	Japan	Appi Cooperative Research Site	Temperate	forest	10	3.98	810	Field	warmed consecutively	None	Both
1073	Hashimoto et al.	2008	Japan	Appi Cooperative Research Site	Temperate	forest	10	3.45	810	Field	warmed consecutively	None	Both
1074	Haynes et al.	1995	USA	Haynes1	Temperate	forest	10	1.94	32	Field	warmed consecutively	None	Both
1075	Heinemeyer et al.	2007	United Kingdom	York	Temperate	forest	15	4.19	180	Field	parallel independent samples	None	Both
1076	Heinemeyer et al.	2007	United Kingdom	York	Temperate	forest	15	3.04	180	Field	parallel independent samples	None	Both
1077	Heinemeyer et al. (b)	2012	United Kingdom	Alice Holt research forest	Temperate	forest	10	2.8	1095	Field	warmed consecutively	Litter removed	Both
1078	Heinemeyer et al. (b)	2012	United Kingdom	Alice Holt research forest	Temperate	forest	10	3.3	1095	Field	warmed consecutively	Litter removed	Both
1079	Heinemeyer et al. (b)	2012	United Kingdom	Alice Holt research forest	Temperate	forest	10	3.3	1095	Field	warmed consecutively	Litter removed	Both
1080	Heinemeyer et al. (b)	2012	United Kingdom	Alice Holt research forest	Temperate	forest	10	3.5	1095	Field	warmed consecutively	Litter removed	Both
1081	Hinko-Najera et al.	2015	Australia	Wombat State forest	Temperate	forest	10	1.47	600	Field	warmed consecutively	Roots removed	Heterotrophic
1082	Hinko-Najera et al.	2015	Australia	Wombat State forest	Temperate	forest	10	1.34	600	Field	warmed consecutively	Roots removed	Heterotrophic
1083	Hirano et al.	2009	Indonesia		Tropical	forest	26.5	2.4	11	Field	warmed consecutively	None	Both
1084	Hirano et al.	2009	Indonesia		Tropical	forest	26.5	2.4	11	Field	warmed consecutively	None	Both
1085	Hirano et al.	2009	Indonesia		Tropical	forest	26.5	3	11	Field	warmed consecutively	None	Both
1086	Hirano et al.	2014	Indonesia		Tropical	forest	30	1.36	545	Field	warmed consecutively	None	Both
1087	Holland et al.	2000	USA	Alice	Subtropical	forest	30	1.5	15	Lab	parallel independent samples	None	Heterotrophic
1088	Holland et al.	2000	USA	Alice	Subtropical	grassland	30	2.1	15	Lab	parallel independent samples	None	Heterotrophic
1089	Holland et al.	2000	USA	Alice	Subtropical	grassland	30	1.7	15	Lab	parallel independent samples	None	Heterotrophic
1090	Holland et al.	2000	USA	Alice	Subtropical	grassland	30	2.2	15	Lab	parallel independent samples	None	Heterotrophic
1091	Holland et al.	2000	USA	Alice	Subtropical	forest	40	3.2	15	Lab	parallel independent samples	None	Heterotrophic
1092	Holland et al.	2000	USA	Alice	Subtropical	grassland	40	3.1	15	Lab	parallel independent samples	None	Heterotrophic
1093	Holland et al.	2000	USA	Alice	Subtropical	grassland	40	2.7	15	Lab	parallel independent samples	None	Heterotrophic
1094	Holland et al.	2000	USA	Alice	Subtropical	grassland	40	2.7	15	Lab	parallel independent samples	None	Heterotrophic
1095	Holland et al.	2000	USA	Alice	Subtropical	forest	50	1.7	15	Lab	parallel independent samples	None	Heterotrophic
1096	Holland et al.	2000	USA	Alice	Subtropical	grassland	50	1.9	15	Lab	parallel independent samples	None	Heterotrophic
1097	Holland et al.	2000	USA	Alice	Subtropical	grassland	50	1.3	15	Lab	parallel independent samples	None	Heterotrophic
1098	Holland et al.	2000	USA	Alice	Subtropical	grassland	20	1.1	15	Lab	parallel independent samples	None	Heterotrophic
1099	Holland et al.	2000	USA	Alice	Subtropical	grassland	20	1.3	15	Lab	parallel independent samples	None	Heterotrophic
1100	Holland et al.	2000	USA	Alice	Subtropical	grassland	50	2	15	Lab	parallel independent samples	None	Heterotrophic
1101	Holland et al.	2000	Costa Rica	La Selva Research Station (Sarapiqui Canton)	Tropical	grassland	30	2.4	15	Lab	parallel independent samples	None	Heterotrophic
1102	Holland et al.	2000	Costa Rica	La Selva Research Station (Sarapiqui Canton)	Tropical	grassland	30	3.4	15	Lab	parallel independent samples	None	Heterotrophic
1103	Holland et al.	2000	Costa Rica	La Selva Research Station (Sarapiqui Canton)	Tropical	grassland	30	2.6	15	Lab	parallel independent samples	None	Heterotrophic
1104	Holland et al.	2000	Costa Rica	La Selva Research Station (Sarapiqui Canton)	Tropical	grassland	30	3.5	15	Lab	parallel independent samples	None	Heterotrophic
1105	Holland et al.	2000	Costa Rica	La Selva Research Station (Sarapiqui Canton)	Tropical	grassland	30	3.4	15	Lab	parallel independent samples	None	Heterotrophic
1106	Holland et al.	2000	Costa Rica	La Selva Research Station (Sarapiqui Canton)	Tropical	grassland	30	2.1	15	Lab	parallel independent samples	None	Heterotrophic
1107	Holland et al.	2000	Costa Rica	La Selva Research Station (Sarapiqui Canton)	Tropical	forest	30	2.7	15	Lab	parallel independent samples	None	Heterotrophic
1108	Holland et al.	2000	Brazil	Fazenda Victoria	Tropical	forest	30	2.2	15	Lab	parallel independent samples	None	Heterotrophic
1109	Holland et al.	2000	Brazil	Fazenda Victoria	Tropical	grassland	30	2	15	Lab	parallel independent samples	None	Heterotrophic
1110	Holland et al.	2000	USA	Mauna Kea	Tropical	forest	30	1.6	15	Lab	parallel independent samples	None	Heterotrophic
1111	Holland et al.	2000	USA	Mauna Kea	Tropical	grassland	30	1.6	15	Lab	parallel independent samples	None	Heterotrophic
1112	Holland et al.	2000	USA	Mauna Kea	Tropical	grassland	30	1.5	15	Lab	parallel independent samples	None	Heterotrophic
1113	Holland et al.	2000	USA	Mauna Kea	Tropical	forest	30	1.2	15	Lab	parallel independent samples	None	Heterotrophic
1114	Holland et al.	2000	USA	Mauna Kea (Maui)	Tropical	grassland	30	1.3	15	Lab	parallel independent samples	None	Heterotrophic
1115	Holland et al.	2000	USA	Mauna Kea (Maui)	Tropical	grassland	40	1.3	15	Lab	parallel independent samples	None	Heterotrophic
1116	Holland et al.	2000	Costa Rica	La Selva Research Station (Sarapiqui Canton)	Tropical	forest	40	2.2	15	Lab	parallel independent samples	None	Heterotrophic
1117	Holland et al.	2000	Costa Rica	La Selva Research Station (Sarapiqui Canton)	Tropical	grassland	40	1.4	15	Lab	parallel independent samples	None	Heterotrophic
1118	Holland et al.	2000	Costa Rica	La Selva Research Station (Sarapiqui Canton)	Tropical	grassland	40	1.1	15	Lab	parallel independent samples	None	Heterotrophic
1119	Holland et al.	2000	Costa Rica	La Selva Research Station (Sarapiqui Canton)	Tropical	grassland	40	1.4	15	Lab	parallel independent samples	None	Heterotrophic
1120	Holland et al.	2000	Costa Rica	La Selva Research Station (Sarapiqui Canton)	Tropical	grassland	40	1.4	15	Lab	parallel independent samples	None	Heterotrophic
1121	Holland et al.	2000	Costa Rica	La Selva Research Station (Sarapiqui Canton)	Tropical	grassland	40	1.4	15	Lab	parallel independent samples	None	Heterotrophic
1122	Holland et al.	2000	Costa Rica	La Selva Research Station (Sarapiqui Canton)	Tropical	grassland	40	1.5	15	Lab	parallel independent samples	None	Heterotrophic
1123	Holland et al.	2000	Costa Rica	La Selva Research Station (Sarapiqui Canton)	Tropical	grassland	40	1.3	15	Lab	parallel independent samples	None	Heterotrophic
1124	Holland et al.	2000	Costa Rica	La Selva Research Station (Sarapiqui Canton)	Tropical	forest	40	1.2	15	Lab	parallel independent samples	None	Heterotrophic
1125	Holland et al.	2000	Brazil	Fazenda Victoria	Tropical	forest	40	1.7	15	Lab	parallel independent samples	None	Heterotrophic
1126	Holland et al.	2000	Brazil	Fazenda Victoria	Tropical	grassland	40	1.5	15	Lab	parallel independent samples	None	Heterotrophic
1127	Holland et al.	2000	USA	Mauna Kea	Tropical	forest	40	1.6	15	Lab	parallel independent samples	None	Heterotrophic
1128	Holland et al.	2000	USA	Mauna Kea	Tropical	grassland	40	1.8	15	Lab	parallel independent samples	None	Heterotrophic
1129	Holland et al.	2000	USA	Mauna Kea	Tropical	grassland	40	1.6	15	Lab	parallel independent samples	None	Heterotrophic
1130	Holland et al.	2000	USA	Mauna Kea	Tropical	forest	40	1.7	15	Lab	parallel independent samples	None	Heterotrophic
1131	Holland et al.	2000	Costa Rica	La Selva Research Station (Sarapiqui Canton)	Tropical	forest	50	1.4	15	Lab	parallel independent samples	None	Heterotrophic
1132	Holland et al.	2000	Costa Rica	La Selva Research Station (Sarapiqui Canton)	Tropical	grassland	50	2.1	15	Lab	parallel independent samples	None	Heterotrophic
1133	Holland et al.	2000	Costa Rica	La Selva Research Station (Sarapiqui Canton)	Tropical	grassland	50	1.5	15	Lab	parallel independent samples	None	Heterotrophic
1134	Holland et al.	2000	Costa Rica	La Selva Research Station (Sarapiqui Canton)	Tropical	grassland	50	1.9	15	Lab	parallel independent samples	None	Heterotrophic
1135	Holland et al.	2000	Costa Rica	La Selva Research Station (Sarapiqui Canton)	Tropical	grassland	50	2.1	15	Lab	parallel independent samples	None	Heterotrophic
1136	Holland et al.	2000	Costa Rica	La Selva Research Station (Sarapiqui Canton)	Tropical	grassland	50	1.9	15	Lab	parallel independent samples	None	Heterotrophic
1137	Holland et al.	2000	Costa Rica	La Selva Research Station (Sarapiqui Canton)	Tropical	grassland	50	2	15	Lab	parallel independent samples	None	Heterotrophic
1138	Holland et al.	2000	Costa Rica	La Selva Research Station (Sarapiqui Canton)	Tropical	grassland	50	1.6	15	Lab	parallel independent samples	None	Heterotrophic
1139	Holland et al.	2000	Costa Rica	La Selva Research Station (Sarapiqui Canton)	Tropical	forest	50	1	15	Lab	parallel independent samples	None	Heterotrophic
1140	Holland et al.	2000	Costa Rica	La Selva Research Station (Sarapiqui Canton)	Tropical	forest	20	4.1	15	Lab	parallel independent samples	None	Heterotrophic
1141	Holland et al.	2000	Costa Rica	La Selva Research Station (Sarapiqui Canton)	Tropical	grassland	20	1.2	15	Lab	parallel independent samples	None	Heterotrophic
1142	Holland et al.	2000	Costa Rica	La Selva Research Station (Sarapiqui Canton)	Tropical	grassland	20	2.6	15	Lab	parallel independent samples	None	Heterotrophic
1143	Holland et al.	2000	Costa Rica	La Selva Research Station (Sarapiqui Canton)	Tropical	grassland	20	3.1	15	Lab	parallel independent samples	None	Heterotrophic
1144	Holland et al.	2000	Brazil	Fazenda Victoria	Tropical	forest	20	3.1	15	Lab	parallel independent samples	None	Heterotrophic
1145	Holland et al.	2000	Brazil	Fazenda Victoria	Tropical	grassland	20	3.1	15	Lab	parallel independent samples	None	Heterotrophic
1146	Holland et al.	2000	USA	Mauna Kea	Tropical	forest	20	1.6	15	Lab	parallel independent samples	None	Heterotrophic
1147	Holland et al.	2000	USA	Mauna Kea	Tropical	grassland	20	1.8	15	Lab	parallel independent samples	None	Heterotrophic
1148	Holland et al.	2000	USA	Mauna Kea	Tropical	grassland	20	2	15	Lab	parallel independent samples	None	Heterotrophic
1149	Holland et al.	2000	USA	Mauna Kea	Tropical	forest	20	2.8	15	Lab	parallel independent samples	None	Heterotrophic
1150	Holland et al.	2000	USA	Mauna Kea (Maui)	Tropical	grassland	20	1.9	15	Lab	parallel independent samples	None	Heterotrophic
1151	Holland et al.	2000	Costa Rica	La Selva Research Station (Sarapiqui Canton)	Tropical	grassland	30	3.1	15	Lab	parallel independent samples	None	Heterotrophic
1152	Holland et al.	2000	Brazil	Fazenda Victoria	Tropical	forest	50	3.4	15	Lab	parallel independent samples	None	Heterotrophic
1153	Holland et al.	2000	Brazil	Fazenda Victoria	Tropical	grassland	50	2.3	15	Lab	parallel independent samples	None	Heterotrophic
1154	Holland et al.	2000	USA	Mauna Kea	Tropical	forest	50	1.5	15	Lab	parallel independent samples	None	Heterotrophic
1155	Holland et al.	2000	USA	Mauna Kea	Tropical	grassland	50	2.2	15	Lab	parallel independent samples	None	Heterotrophic
1156	Holland et al.	2000	USA	Mauna Kea	Tropical	grassland	50	1.7	15	Lab	parallel independent samples	None	Heterotrophic
1157	Holland et al.	2000	USA	Mauna Kea	Tropical	forest	50	1.9	15	Lab	parallel independent samples	None	Heterotrophic
1158	Holland et al.	2000	USA	Mauna Kea (Maui)	Tropical	grassland	50	1.9	15	Lab	parallel independent samples	None	Heterotrophic
1159	Howard et al.	2004	Canada	BOREAS-SSA	Boreal	forest	10	3.77	540	Field	parallel independent samples	None	Both
1160	Hu et al.	2001	Japan	Hokkaido University Livestock Farm	Temperate	grassland	10	3.29	5	Field	warmed consecutively	Plants Cut	Both
1161	Hu et al.	2001	Japan	Hokkaido University Livestock Farm	Temperate	forest	10	1.92	5	Field	warmed consecutively	Plants Cut	Both
1162	Hu et al.	2004	Japan	Mikasa	Temperate	agriculture	10	2.2	210	Field	warmed consecutively	Fertilized	Both
1163	Hu et al.	2004	Japan	Mikasa	Temperate	agriculture	10	1.6	210	Field	warmed consecutively	Fertilized	Both
1164	Hu et al.	2004	Japan	Mikasa	Temperate	agriculture	10	2.8	210	Field	warmed consecutively	None	Both
1165	Hu et al.	2004	Japan	Mikasa	Temperate	agriculture	10	1.8	210	Field	warmed consecutively	None	Both
1166	Hu et al.	2004	Japan	Mikasa	Temperate	agriculture	10	2.2	210	Field	warmed consecutively	Fertilized	Both
1167	Hu et al.	2004	Japan	Mikasa	Temperate	agriculture	10	1.6	210	Field	warmed consecutively	Fertilized	Both
1168	Hu et al.	2004	Japan	Mikasa	Temperate	agriculture	10	2.5	210	Field	warmed consecutively	None	Both
1169	Hu et al.	2004	Japan	Mikasa	Temperate	agriculture	10	1.9	210	Field	warmed consecutively	None	Both
1170	Hu et al.	2004	Japan	Mikasa	Temperate	agriculture	10	2.1	210	Field	warmed consecutively	Fertilized	Both
1171	Hu et al.	2004	Japan	Mikasa	Temperate	agriculture	10	1.7	210	Field	warmed consecutively	Fertilized	Both
1172	Hu et al.	2004	Japan	Mikasa	Temperate	agriculture	10	3.1	210	Field	warmed consecutively	None	Both
1173	Hu et al.	2004	Japan	Mikasa	Temperate	agriculture	10	1.8	210	Field	warmed consecutively	None	Both
1174	Hu et al. (a)	2010	China	Jungar Basin	Subtropical	agriculture	24	1.8	365	Field	warmed consecutively	None	Both
1175	Hu et al. (a)	2010	China	Jungar Basin	Subtropical	agriculture	24	1.72	365	Field	warmed consecutively	None	Both
1176	Hu et al. (a)	2010	China	Jungar Basin	Subtropical	agriculture	24.5	1.55	365	Field	warmed consecutively	None	Both
1177	Hu et al. (a)	2010	China	Jungar Basin	Subtropical	agriculture	24.5	1.92	365	Field	warmed consecutively	None	Both
1178	Hu et al. (a)	2013	China	Ecological and Agricultural Meteorology Experimental Station	Temperate	agriculture	12	4.267	72	Field	warmed consecutively	None	Both
1179	Hu et al. (a)	2013	China	Ecological and Agricultural Meteorology Experimental Station	Temperate	agriculture	11.5	3.251	72	Field	warmed consecutively	None	Both
1180	Hu et al. (a)	2013	China	Ecological and Agricultural Meteorology Experimental Station	Temperate	agriculture	12.5	2.37	72	Field	warmed consecutively	None	Both
1181	Hu et al. (a)	2013	China	Ecological and Agricultural Meteorology Experimental Station	Temperate	agriculture	10.5	1.865	72	Field	warmed consecutively	None	Both
1182	Hu et al. (a)	2014	China	Xiayang forest farm	Subtropical	forest	12.5	2.13	330	Field	warmed consecutively	None	Both
1183	Hu et al. (b)	2010	China	Jungar Basin	Subtropical	forest	16	1.22	6	Field	warmed consecutively	None	Both
1184	Hu et al. (b)	2010	China	Jungar Basin	Subtropical	forest	16	1.24	6	Field	warmed consecutively	None	Both
1185	Hu et al. (b)	2010	China	Jungar Basin	Subtropical	forest	16	2.75	6	Field	warmed consecutively	None	Both
1186	Hu et al. (b)	2010	China	Jungar Basin	Subtropical	forest	16	1.49	6	Field	warmed consecutively	None	Both
1187	Hu et al. (b)	2010	China	Jungar Basin	Subtropical	forest	16	1.8	6	Field	warmed consecutively	None	Both
1188	Hu et al. (b)	2014	China	Yangjuangou	Temperate	forest	10	3.35	90	Field	warmed consecutively	Litter removed	Both
1189	Hu et al. (b)	2014	China	Yangjuangou	Temperate	grassland	15	2.23	90	Field	warmed consecutively	Litter removed	Both
1190	Hu et al. (b)	2013	China	Nanjing University of Information Science and Technology Experimental Farm	Subtropical	agriculture	24	1.916	70	Field	warmed consecutively	None	Both
1191	Hu et al. (b)	2013	China	Nanjing University of Information Science and Technology Experimental Farm	Subtropical	agriculture	24	1.804	70	Field	warmed consecutively	Cropping	Both
1192	Hu et al. (b)	2013	China	Nanjing University of Information Science and Technology Experimental Farm	Subtropical	agriculture	24	1.716	70	Field	warmed consecutively	Cropping	Both
1193	Hu et al. (b)	2013	China	Nanjing University of Information Science and Technology Experimental Farm	Subtropical	agriculture	24	1.553	70	Field	warmed consecutively	Cropping	Both
1194	Huang et al.	2014	China	Xiayang forest farm	Subtropical	forest	16.75	1.974	365	Field	warmed consecutively	None	Both
1195	Huang et al.	2014	China	Xiayang forest farm	Subtropical	forest	16.75	1.878	365	Field	warmed consecutively	None	Both
1196	Hui et al.	2007	China	Foshan	Subtropical	forest	15	2.64	475	Field	warmed consecutively	None	Both
1197	Hui et al.	2007	China	Foshan	Subtropical	forest	15	1.86	475	Field	warmed consecutively	None	Both
1198	Humphreys et al.	2006	Canada	HDF88	Temperate	forest	10	2.6	365	Field	parallel independent samples	None	Both
1199	Humphreys et al.	2006	Canada	HDF00	Temperate	forest	10	2	365	Field	parallel independent samples	None	Both
1200	Humphreys et al.	2006	Canada	DF49	Temperate	forest	10	2.2	365	Field	parallel independent samples	None	Both
1201	Hwang et al.	2002	South Korea	Gyeonggido Experimental Forest	Temperate	forest	10	3.7	365	Field	warmed consecutively	None	Both
1202	Hwang et al.	2002	South Korea	Gyeonggido Experimental Forest	Temperate	forest	10	3.55	365	Field	warmed consecutively	None	Both
1203	Hwang et al.	2002	South Korea	Gyeonggido Experimental Forest	Temperate	forest	10	3.3	365	Field	warmed consecutively	None	Both
1204	Hwang et al.	2002	South Korea	Gyeonggido Experimental Forest	Temperate	forest	10	3.15	365	Field	warmed consecutively	None	Both
1205	Hwang et al.	2002	South Korea	Gyeonggido Experimental Forest	Temperate	forest	10	2.98	365	Field	warmed consecutively	None	Both
1206	Hwang et al.	2002	South Korea	Gyeonggido Experimental Forest	Temperate	forest	10	2.97	365	Field	warmed consecutively	None	Both
1207	Hwang et al.	2002	South Korea	Gyeonggido Experimental Forest	Temperate	forest	10	4.46	365	Field	warmed consecutively	None	Both
1208	Inclan et al.	2010	Spain	Valsa?n-plot33	Subtropical	forest	10	1.68	210	Field	warmed consecutively	None	Both
1209	Inclan et al.	2010	Spain	Valsa?n-plot22	Subtropical	forest	10	1.78	210	Field	warmed consecutively	None	Both
1210	Inclan et al.	2010	Spain	Valsa?n-plot14	Subtropical	forest	10	3.61	210	Field	warmed consecutively	None	Both
1211	Inclan et al.	2010	Spain	Valsa?n-plot42	Subtropical	forest	15	1.3	210	Field	warmed consecutively	None	Both
1212	Inoue et al.	2012	Japan	Grasland	Temperate	grassland	15	2.25	810	Field	parallel independent samples	None	Both
1213	Inoue et al.	2012	Japan	Grasland	Temperate	grassland	15	2.484	810	Field	parallel independent samples	None	Both
1214	Iqbal et al.	2008	China	Heshengqiao Experimental Station	Subtropical	agriculture	20	1.37	1004	Field	warmed consecutively	Plant/Roots removed	Both
1215	Iqbal et al.	2008	China	Heshengqiao Experimental Station	Subtropical	agriculture	20	1.46	1004	Field	warmed consecutively	Plant/Roots removed	Both
1216	Iqbal et al.	2008	China	Heshengqiao Experimental Station	Subtropical	forest	20	1.38	1004	Field	warmed consecutively	Plant/Roots removed	Both
1217	Iqbal et al.	2008	China	Heshengqiao Experimental Station	Subtropical	forest	20	1.39	1004	Field	warmed consecutively	Plant/Roots removed	Both
1218	Irvine et al.	2002	USA	Metiolus-O	Temperate	forest	10	2.9	900	Field	warmed consecutively	None	Both
1219	Irvine et al.	2005	USA	Sisters	Temperate	forest	15	1.6	70	Field	warmed consecutively	Irrigated	Both
1220	Isagi et al.	1994	Japan	Kyoto	Subtropical	forest	10	2.46	2555	Field	warmed consecutively	None	Both
1221	Isagi et al.	1997	Japan	Kyoto prefecture	Subtropical	forest	10	2.38	365	Field	warmed consecutively	None	Both
1222	Ishizuka et al.	2006	Japan	KZ	Subtropical	forest	15	1.75	240	Field	warmed consecutively	None	Both
1223	Ishizuka et al.	2006	Japan	KB2	Subtropical	forest	15	1.97	1185	Field	warmed consecutively	None	Both
1224	Ishizuka et al.	2006	Japan	TK	Subtropical	forest	15	1.7	210	Field	warmed consecutively	None	Both
1225	Ishizuka et al.	2006	Japan	KB1	Subtropical	forest	15	3.63	1765	Field	warmed consecutively	None	Both
1226	Ishizuka et al.	2006	Japan	ST	Subtropical	forest	10	1.65	240	Field	warmed consecutively	None	Both
1227	Ishizuka et al.	2006	Japan	KH	Subtropical	forest	15	3.63	1095	Field	warmed consecutively	None	Both
1228	Ishizuka et al.	2006	Japan	OT	Subtropical	forest	15	3.49	485	Field	warmed consecutively	None	Both
1229	Ishizuka et al.	2006	Japan	HT	Subtropical	forest	15	4.48	365	Field	warmed consecutively	None	Both
1230	Ishizuka et al.	2006	Japan	IB	Subtropical	forest	10	2.29	240	Field	warmed consecutively	None	Both
1231	Ishizuka et al.	2006	Japan	OG4	Subtropical	forest	15	3.9	395	Field	warmed consecutively	None	Both
1232	Ishizuka et al.	2006	Japan	OG2	Subtropical	forest	15	3.53	1005	Field	warmed consecutively	None	Both
1233	Ishizuka et al.	2006	Japan	OG3	Subtropical	forest	15	3.94	395	Field	warmed consecutively	None	Both
1234	Ishizuka et al.	2006	Japan	OG1	Subtropical	forest	15	4.1	2555	Field	warmed consecutively	None	Both
1235	Ishizuka et al.	2006	Japan	OD2	Subtropical	forest	10	3.35	455	Field	warmed consecutively	None	Both
1236	Ishizuka et al.	2006	Japan	OD1	Subtropical	forest	10	2.56	455	Field	warmed consecutively	None	Both
1237	Ishizuka et al.	2006	Japan	HG3	Temperate	forest	10	2.34	455	Field	warmed consecutively	None	Both
1238	Ishizuka et al.	2006	Japan	HG1	Temperate	forest	10	2.72	455	Field	warmed consecutively	None	Both
1239	Ishizuka et al.	2006	Japan	HG2	Temperate	forest	10	2.51	455	Field	warmed consecutively	None	Both
1240	Ishizuka et al.	2006	Japan	MM	Temperate	forest	10	2.34	365	Field	warmed consecutively	None	Both
1241	Ishizuka et al.	2006	Japan	JK	Temperate	forest	10	2.27	365	Field	warmed consecutively	None	Both
1242	Ishizuka et al.	2006	Japan	TZ	Temperate	forest	10	3.13	515	Field	warmed consecutively	None	Both
1243	Ishizuka et al.	2006	Japan	AP	Temperate	forest	10	3.42	515	Field	warmed consecutively	None	Both
1244	Ishizuka et al.	2006	Japan	SK	Temperate	forest	10	2.46	730	Field	warmed consecutively	None	Both
1245	Ishizuka et al.	2006	Japan	ANM	Temperate	forest	10	1.72	120	Field	warmed consecutively	None	Both
1246	Jabro et al.	2008	USA	USDA-ARS Nesson Valley Research Farm	Temperate	agriculture	10	3.82	240	Field	parallel independent samples	None	Both
1247	Jabro et al.	2008	USA	USDA-ARS Nesson Valley Research Farm	Temperate	agriculture	10	3.39	240	Field	parallel independent samples	None	Both
1248	Jabro et al.	2008	USA	USDA-ARS Nesson Valley Research Farm	Temperate	agriculture	10	2.97	240	Field	parallel independent samples	None	Both
1249	Jabro et al.	2008	USA	USDA-ARS Nesson Valley Research Farm	Temperate	agriculture	10	3.63	240	Field	parallel independent samples	None	Both
1250	Jabro et al.	2008	USA	USDA-ARS Nesson Valley Research Farm	Temperate	agriculture	10	2.41	240	Field	parallel independent samples	None	Both
1251	Jacinthe et al.	2015	USA	Southwestway Park-S3	Temperate	forest	15	3.127	700	Field	warmed consecutively	None	Both
1252	Jacinthe et al.	2015	USA	Lilly Arbor-S2	Temperate	forest	14	2.034	700	Field	warmed consecutively	None	Both
1253	Jacinthe et al.	2015	USA	McCormick's Creek State Park-S4	Temperate	forest	15	2.718	700	Field	warmed consecutively	None	Both
1254	Jacinthe et al.	2015	USA	Southwestway Park-S5	Temperate	forest	15	2.387	700	Field	warmed consecutively	None	Both
1255	Jacinthe et al.	2015	USA	McCormick's Creek State Park-S6	Temperate	forest	15	2.801	700	Field	warmed consecutively	None	Both
1256	Jacinthe et al.	2015	USA	Lilly Arbor-S1	Temperate	forest	14	1.751	700	Field	warmed consecutively	None	Both
1257	Janssens et al.	2003	Denmark	Zealand island	Temperate	forest	8	4.07	365	Field	warmed consecutively	None	Both
1258	Janssens et al.	2003	Denmark	Zealand island	Temperate	forest	8	4	365	Field	warmed consecutively	None	Both
1259	Jassal et al.	2005	Canada	Campbell River	Temperate	forest	10	3.74	300	Field	warmed consecutively	None	Both
1260	Jassal et al.	2005	Canada	Campbell River	Temperate	forest	10	2.69	300	Field	warmed consecutively	None	Both
1261	Jassal et al.	2007	Canada	Campbell River	Temperate	forest	9	4.46	180	Field	warmed consecutively	None	Both
1262	Jassal et al.	2007	Canada	Campbell River	Temperate	forest	9	4.27	180	Field	warmed consecutively	None	Both
1263	Jassal et al.	2007	Canada	Campbell River	Temperate	forest	10	2.9	180	Field	warmed consecutively	None	Both
1264	Jassal et al.	2007	Canada	Campbell River	Temperate	forest	10	3.81	180	Field	warmed consecutively	None	Both
1265	Jassal et al.	2007	Canada	Campbell River	Temperate	forest	10	2.85	300	Field	warmed consecutively	None	Both
1266	Jassal et al.	2007	Canada	Campbell River	Temperate	forest	10	3.8	180	Field	warmed consecutively	None	Both
1267	Jassal et al.	2007	Canada	Campbell River	Temperate	forest	10	2.94	180	Field	warmed consecutively	None	Both
1268	Jassal et al.	2007	Canada	Campbell River	Temperate	forest	10	3.65	180	Field	warmed consecutively	None	Both
1269	Jenkins and Adams	2011	Australia	Snowy Mountains	Temperate	grassland	30	2.63	0	Lab	warmed consecutively	Wetting	Heterotrophic
1270	Jenkins and Adams	2011	Australia	Snowy Mountains	Temperate	grassland	30	2.36	30	Lab	warmed consecutively	Wetting	Heterotrophic
1271	Jenkins and Adams	2011	Australia	Snowy Mountains	Temperate	grassland	30	2.54	90	Lab	warmed consecutively	Wetting	Heterotrophic
1272	Jenkins and Adams	2011	Australia	Snowy Mountains	Temperate	grassland	30	2.89	120	Lab	warmed consecutively	Wetting	Heterotrophic
1273	Jenkins and Adams	2011	Australia	Snowy Mountains	Temperate	grassland	30	2.38	0	Lab	warmed consecutively	Wetting	Heterotrophic
1274	Jenkins and Adams	2011	Australia	Snowy Mountains	Temperate	grassland	30	2.77	30	Lab	warmed consecutively	Wetting	Heterotrophic
1275	Jenkins and Adams	2011	Australia	Snowy Mountains	Temperate	grassland	30	2.14	90	Lab	warmed consecutively	Wetting	Heterotrophic
1276	Jenkins and Adams	2011	Australia	Snowy Mountains	Temperate	grassland	30	2.3	120	Lab	warmed consecutively	Wetting	Heterotrophic
1277	Jenkins and Adams	2011	Australia	Snowy Mountains	Temperate	forest	30	2.38	0	Lab	warmed consecutively	Wetting	Heterotrophic
1278	Jenkins and Adams	2011	Australia	Snowy Mountains	Temperate	forest	30	2.56	30	Lab	warmed consecutively	Wetting	Heterotrophic
1279	Jenkins and Adams	2011	Australia	Snowy Mountains	Temperate	forest	30	2.48	90	Lab	warmed consecutively	Wetting	Heterotrophic
1280	Jenkins and Adams	2011	Australia	Snowy Mountains	Temperate	forest	30	2.33	120	Lab	warmed consecutively	Wetting	Heterotrophic
1281	Jenkins and Adams	2011	Australia	Snowy Mountains	Temperate	forest	30	2.28	0	Lab	warmed consecutively	Wetting	Heterotrophic
1282	Jenkins and Adams	2011	Australia	Snowy Mountains	Temperate	forest	30	2.64	30	Lab	warmed consecutively	Wetting	Heterotrophic
1283	Jenkins and Adams	2011	Australia	Snowy Mountains	Temperate	forest	30	3	90	Lab	warmed consecutively	Wetting	Heterotrophic
1284	Jenkins and Adams	2011	Australia	Snowy Mountains	Temperate	forest	30	2.58	120	Lab	warmed consecutively	Wetting	Heterotrophic
1285	Jenkins and Adams	2011	Australia	Snowy Mountains	Temperate	forest	30	2.85	0	Lab	warmed consecutively	Wetting	Heterotrophic
1286	Jenkins and Adams	2011	Australia	Snowy Mountains	Temperate	forest	30	2.49	30	Lab	warmed consecutively	Wetting	Heterotrophic
1287	Jenkins and Adams	2011	Australia	Snowy Mountains	Temperate	forest	30	2.41	90	Lab	warmed consecutively	Wetting	Heterotrophic
1288	Jenkins and Adams	2011	Australia	Snowy Mountains	Temperate	forest	30	2.49	120	Lab	warmed consecutively	Wetting	Heterotrophic
1289	Jenkins and Adams	2011	Australia	Snowy Mountains	Temperate	forest	30	2.3	0	Lab	warmed consecutively	Wetting	Heterotrophic
1290	Jenkins and Adams	2011	Australia	Snowy Mountains	Temperate	forest	30	2.46	30	Lab	warmed consecutively	Wetting	Heterotrophic
1291	Jenkins and Adams	2011	Australia	Snowy Mountains	Temperate	forest	30	2.4	90	Lab	warmed consecutively	Wetting	Heterotrophic
1292	Jenkins and Adams	2011	Australia	Snowy Mountains	Temperate	forest	30	2.52	120	Lab	warmed consecutively	Wetting	Heterotrophic
1293	Jeong et al.	2013	South Korea	Wola National Experimental forest	Temperate	forest	16.5	4.26	730	Field	warmed consecutively	None	Both
1294	Jeong et al.	2013	South Korea	Wola National Experimental forest	Temperate	forest	16	3.6	730	Field	warmed consecutively	None	Both
1295	Jeong et al.	2013	South Korea	Wola National Experimental forest	Temperate	forest	15.5	2.94	730	Field	warmed consecutively	None	Both
1296	Jeong et al.	2013	South Korea	Wola National Experimental forest	Temperate	forest	15	2.85	730	Field	warmed consecutively	None	Both
1297	Jeong et al.	2013	South Korea	Wola National Experimental forest	Temperate	forest	17	2.81	730	Field	warmed consecutively	None	Both
1298	Jia et al.	2006	China	Baiinxile	Temperate	grassland	10	2.72	365	Field	warmed consecutively	None	Both
1299	Jia et al.	2006	China	Baiinxile	Temperate	grassland	10	2.46	365	Field	warmed consecutively	None	Both
1300	Jia et al.	2009	China	Bainxile Livestock Farm	Temperate	grassland	7.5	2.23	9	Field	warmed consecutively	None	Both
1301	Jia et al.	2009	China	Bainxile Livestock Farm	Temperate	grassland	9.5	1.73	9	Field	warmed consecutively	None	Both
1302	Jia et al.	2009	China	Bainxile Livestock Farm	Temperate	grassland	15.5	2.72	9	Field	warmed consecutively	None	Both
1303	Jia et al.	2009	China	Bainxile Livestock Farm	Temperate	grassland	16.5	2.35	9	Field	warmed consecutively	None	Both
1304	Jia et al.	2009	China	Bainxile Livestock Farm	Temperate	grassland	16.5	1.82	9	Field	warmed consecutively	None	Both
1305	Jia et al.	2009	China	Bainxile Livestock Farm	Temperate	grassland	18	1.93	9	Field	warmed consecutively	None	Both
1306	Jia et al.	2009	China	Bainxile Livestock Farm	Temperate	grassland	18	2.18	9	Field	warmed consecutively	None	Both
1307	Jia et al.	2009	China	Bainxile Livestock Farm	Temperate	grassland	19	1.69	9	Field	warmed consecutively	None	Both
1308	Jia et al.	2009	China	Bainxile Livestock Farm	Temperate	grassland	21	1.55	9	Field	warmed consecutively	None	Both
1309	Jia et al.	2009	China	Bainxile Livestock Farm	Temperate	grassland	21	1.7	9	Field	warmed consecutively	None	Both
1310	Jia et al.	2009	China	Bainxile Livestock Farm	Temperate	grassland	21.5	1.91	9	Field	warmed consecutively	None	Both
1311	Jia et al.	2009	China	Bainxile Livestock Farm	Temperate	grassland	22	1.54	9	Field	warmed consecutively	None	Both
1312	Jia et al.	2009	China	Bainxile Livestock Farm	Temperate	grassland	22.5	1.56	9	Field	warmed consecutively	None	Both
1313	Jia et al.	2009	China	Bainxile Livestock Farm	Temperate	grassland	20.5	1.7	9	Field	warmed consecutively	None	Both
1314	Jia et al.	2009	China	Bainxile Livestock Farm	Temperate	grassland	23	2.18	9	Field	warmed consecutively	None	Both
1315	Jia et al.	2009	China	Bainxile Livestock Farm	Temperate	grassland	24	1.91	9	Field	warmed consecutively	None	Both
1316	Jia et al.	2009	China	Bainxile Livestock Farm	Temperate	grassland	9.5	1.65	9	Field	warmed consecutively	None	Both
1317	Jia et al.	2009	China	Bainxile Livestock Farm	Temperate	grassland	14.5	1.42	9	Field	warmed consecutively	None	Both
1318	Jia et al.	2010	China	Maoershan Experimental Station	Temperate	forest	10	3	880	Field	warmed consecutively	Fertilized	Both
1319	Jia et al.	2010	China	Maoershan Experimental Station	Temperate	forest	10	3	880	Field	warmed consecutively	Fertilized	Both
1320	Jia et al.	2010	China	Maoershan Experimental Station	Temperate	forest	10	2.75	880	Field	warmed consecutively	Fertilized	Both
1321	Jia et al.	2010	China	Maoershan Experimental Station	Temperate	forest	10	2.5	880	Field	warmed consecutively	Fertilized	Both
1322	Jia et al.	2012	China	Shenmu Erosion and Environment Research Station of the Institute of Soil and Water Conservation	Temperate	grassland	15	1.46	113	Field	warmed consecutively	None	Both
1323	Jia et al.	2013	China	Badaling Mountain	Temperate	forest	7.5	2.76	180	Field	warmed consecutively	None	Both
1324	Jia et al.	2013	China	Badaling Mountain	Temperate	forest	7.5	2.3	180	Field	warmed consecutively	None	Both
1325	Jia et al.	2013	China	Badaling Mountain	Temperate	forest	7.5	3.57	180	Field	warmed consecutively	None	Both
1326	Jia et al.	2013	China	Badaling Mountain	Temperate	forest	7.5	2.56	180	Field	warmed consecutively	None	Both
1327	Jia et al.	2013	China	Badaling Mountain	Temperate	forest	7.5	2.61	180	Field	warmed consecutively	None	Both
1328	Jia et al.	2013	China	Badaling Mountain	Temperate	forest	7.5	3.39	180	Field	warmed consecutively	None	Both
1329	Jia et al. (a)	2007	China	Maoershan Forest Research Station	Temperate	forest	10	2.6	395	Field	warmed consecutively	Fertilized	Both
1330	Jia et al. (a)	2007	China	Maoershan Forest Research Station	Temperate	forest	10	2.62	395	Field	warmed consecutively	Fertilized	Both
1331	Jia et al. (a)	2007	China	Maoershan Forest Research Station	Temperate	forest	10	3.29	395	Field	warmed consecutively	Fertilized	Both
1332	Jia et al. (a)	2007	China	Maoershan Forest Research Station	Temperate	forest	10	3.25	395	Field	warmed consecutively	Fertilized	Both
1333	Jia et al. (a)	2007	China	Maoershan Forest Research Station	Temperate	forest	10	3.05	395	Field	warmed consecutively	Fertilized	Both
1334	Jia et al. (a)	2007	China	Maoershan Forest Research Station	Temperate	forest	10	3.02	395	Field	warmed consecutively	Fertilized	Both
1335	Jia et al. (a)	2007	China	Maoershan Forest Research Station	Temperate	forest	10	2.47	395	Field	warmed consecutively	Fertilized	Both
1336	Jia et al. (a)	2007	China	Maoershan Forest Research Station	Temperate	forest	10	2.45	395	Field	warmed consecutively	Fertilized	Both
1337	Jia et al. (a)	2013	China	Shenmu Erosion and Environment Research Station	Temperate	grassland	18.5	1.935	365	Field	warmed consecutively	Fertilized	Both
1338	Jia et al. (a)	2013	China	Shenmu Erosion and Environment Research Station	Temperate	grassland	19.5	1.733	365	Field	warmed consecutively	Fertilized	Both
1339	Jia et al. (a)	2013	China	Shenmu Erosion and Environment Research Station	Temperate	grassland	20.5	1.716	365	Field	warmed consecutively	Fertilized	Both
1340	Jia et al. (a)	2013	China	Shenmu Erosion and Environment Research Station	Temperate	grassland	19	1.537	365	Field	warmed consecutively	Fertilized	Both
1341	Jia et al. (a)	2013	China	Shenmu Erosion and Environment Research Station	Temperate	grassland	20	1.537	365	Field	warmed consecutively	Fertilized	Both
1342	Jia et al. (a)	2013	China	Shenmu Erosion and Environment Research Station	Temperate	grassland	21.5	1.448	365	Field	warmed consecutively	Fertilized	Both
1343	Jia et al. (a)	2013	China	Shenmu Erosion and Environment Research Station	Temperate	grassland	21	1.35	365	Field	warmed consecutively	Fertilized	Both
1344	Jia et al. (a)	2013	China	Shenmu Erosion and Environment Research Station	Temperate	grassland	18	1.935	365	Field	warmed consecutively	Fertilized	Both
1345	Jia et al. (b)	2007	China	Baiinxile Livestock Farm	Temperate	grassland	15	1.6	1460	Field	warmed consecutively	Clipped Plants	Both
1346	Jia et al. (b)	2007	China	Baiinxile Livestock Farm	Temperate	grassland	15	2.25	1460	Field	warmed consecutively	Clipped Plants	Both
1347	Jia et al. (a)	2013	China	Badaling Mountain	Temperate	forest	8	2.76	365	Field	warmed consecutively	None	Both
1348	Jia et al. (c)	2007	China	Baiinxile Livestock Farm	Temperate	grassland	10	2.5	365	Field	warmed consecutively	Clipped Plants	Both
1349	Jia et al. (c)	2007	China	Baiinxile Livestock Farm	Temperate	grassland	10	2.5	365	Field	warmed consecutively	Clipped Plants	Both
1350	Jiang et al.	1997	China	Beijing Forest Ecosystem Research Station	Temperate	forest	15	2.39	120	Field	warmed consecutively	None	Both
1351	Jiang et al.	2015	China	State Key Agro-Ecological Experimental Station	Temperate	agriculture	12.5	2.76	1095	Field	warmed consecutively	Living removed	Both
1352	Jiang et al.	2015	China	State Key Agro-Ecological Experimental Station	Temperate	agriculture	12.5	1.85	1095	Field	warmed consecutively	Living removed	Both
1353	Jiang et al.	2015	China	State Key Agro-Ecological Experimental Station	Temperate	agriculture	12.5	1.47	1095	Field	warmed consecutively	Living removed	Both
1354	Jiang et al. (a)	2010	China	Xinyu	Subtropical	forest	20	1.27	365	Field	warmed consecutively	None	Both
1355	Jiang et al. (a)	2010	China	Xinyu	Subtropical	forest	20	1.42	365	Field	warmed consecutively	None	Both
1356	Jiang et al. (a)	2010	China	Xinyu	Subtropical	forest	20	1.31	365	Field	warmed consecutively	None	Both
1357	Jiang et al. (b)	2005	China	Lao Shan Experimental Station	Temperate	forest	15	3.67	240	Field	warmed consecutively	Trenched	Both
1358	Jiang et al. (b)	2005	China	Lao Shan Experimental Station	Temperate	forest	15	4.06	240	Field	warmed consecutively	Trenched	Both
1359	Jiang et al. (b)	2010	China	Haibei Alpine Meadow Ecosystem Re- search Station	Temperate	grassland	10	3.9	180	Field	warmed consecutively	None	Both
1360	Jiang et al. (b)	2010	China	Haibei Alpine Meadow Ecosystem Re- search Station	Temperate	grassland	10	3.94	180	Field	warmed consecutively	None	Both
1361	Jiang et al. (b)	2010	China	Haibei Alpine Meadow Ecosystem Re- search Station	Temperate	grassland	10	3.86	180	Field	warmed consecutively	None	Both
1362	Jin et al.	2010	China	Ordos Sandy grassland Research Station	Temperate	grassland	17.5	1.7	300	Field	warmed consecutively	None	Both
1363	Jin et al.	2010	China	Ordos Sandy grassland Research Station	Temperate	grassland	17.5	1.43	300	Field	warmed consecutively	None	Both
1364	Jin et al.	2010	China	Ordos Sandy grassland Research Station	Temperate	grassland	19	2.4	300	Field	warmed consecutively	None	Both
1365	Jin et al.	2010	China	Ordos Sandy grassland Research Station	Temperate	grassland	19	1.46	300	Field	warmed consecutively	None	Both
1366	Jin et al. (a)	2009	China	Hunshandak Sandland-O2	Temperate	forest	25	1.46	90	Field	warmed consecutively	None	Both
1367	Jin et al. (a)	2009	China	Hunshandak Sandland-C2	Temperate	forest	21	1.86	90	Field	warmed consecutively	None	Both
1368	Jin et al. (a)	2009	China	Hunshandak Sandland-C1	Temperate	forest	20.5	1.93	90	Field	warmed consecutively	None	Both
1369	Jin et al. (a)	2009	China	Hunshandak Sandland-O1	Temperate	forest	22	1.71	90	Field	warmed consecutively	None	Both
1370	Jin et al. (b)	2009	China	Ordos Sandy grassland Research Station	Temperate	grassland	21	2.39	210	Field	warmed consecutively	None	Both
1371	Jin et al. (b)	2009	China	Ordos Sandy grassland Research Station	Temperate	grassland	22	2.61	210	Field	warmed consecutively	None	Both
1372	Jonard et al.	2007	Belgium	Ardennes	Temperate	forest	11	1.56	28	Lab	parallel independent samples	Wetting	Both
1373	Jonard et al.	2007	Belgium	Ardennes	Temperate	forest	11	2.27	28	Lab	parallel independent samples	Wetting	Both
1374	Jonard et al.	2007	Belgium	Ardennes	Temperate	forest	11	1.5	28	Lab	parallel independent samples	Wetting	Both
1375	Jonard et al.	2007	Belgium	Ardennes	Temperate	forest	11	1.71	28	Lab	parallel independent samples	Wetting	Both
1376	Jonard et al.	2007	Belgium	Ardennes	Temperate	forest	11	2.01	28	Lab	parallel independent samples	Wetting	Both
1377	Jonard et al.	2007	Belgium	Ardennes	Temperate	forest	11	1.71	28	Lab	parallel independent samples	Wetting	Both
1378	Jones et al.	2006	United Kingdom	Edinburgh	Temperate	grassland	10	3.16	450	Field	warmed consecutively	Fertilized	Both
1379	Jongen et al.	2013	Portugal	Herdade da Machoqueira do Grou	Temperate	forest	13.5	2.46	270	Field	warmed consecutively	Wetting	Both
1380	Jonsson et al.	2010	Iceland	Gunnarsholt	Boreal	forest	5	4.26	60	Field	warmed consecutively	Thinning	Both
1381	Joo et al.	2012	South Korea	Nam-San	Temperate	forest	12	2.64	360	Field	warmed consecutively	Vegetation removed	Both
1382	Joos et al.	2010	Switzerland	Chamau	Temperate	grassland	15	2.16	240	Field	warmed consecutively	Drought	Both
1383	Joos et al.	2010	Switzerland	Chamau	Temperate	grassland	15	1.97	240	Field	warmed consecutively	Drought	Both
1384	Joos et al.	2010	Switzerland	Chamau	Temperate	grassland	15	1.83	240	Field	warmed consecutively	Drought	Both
1385	Joos et al.	2010	Switzerland	Chamau	Temperate	grassland	15	2.13	240	Field	warmed consecutively	Drought	Both
1386	Jose et al.	2007	Venezuela	Santa Barbara Experimental Station	Tropical	agriculture	30	1.69	830	Field	warmed consecutively	Roots removed	Heterotrophic
1387	Jung et al.	2015	South Korea	Uljin-gun	Temperate	forest	9.5	4.003	365	Field	warmed consecutively	None	Both
1388	Kane et al.	2003	USA	Olympic National Park-HOH	Temperate	forest	10	3.69	120	Field	warmed consecutively	None	Both
1389	Kane et al.	2003	USA	Olympic National Park-ELW	Temperate	forest	10	2.92	120	Field	warmed consecutively	None	Both
1390	Kane et al.	2003	USA	Olympic National Park-RL	Temperate	forest	10	2.25	120	Field	warmed consecutively	None	Both
1391	Kane et al.	2003	USA	Olympic National Park-DLN	Temperate	forest	10	2.72	120	Field	warmed consecutively	None	Both
1392	Kane et al.	2003	USA	Olympic National Park-DLS	Temperate	forest	10	2.96	120	Field	warmed consecutively	None	Both
1393	Kane et al.	2003	USA	Olympic National Park-DMN	Temperate	forest	10	1.91	120	Field	warmed consecutively	None	Both
1394	Kane et al.	2003	USA	Olympic National Park-RM	Temperate	forest	10	3.14	120	Field	warmed consecutively	None	Both
1395	Kane et al.	2003	USA	Olympic National Park-DMS	Temperate	forest	10	3.25	120	Field	warmed consecutively	None	Both
1396	Kane et al.	2003	USA	Olympic National Park-RH	Temperate	forest	10	1.62	120	Field	warmed consecutively	None	Both
1397	Kane et al.	2003	USA	Olympic National Park-DHS	Temperate	forest	10	2.5	120	Field	warmed consecutively	None	Both
1398	Kang et al.	2003	South Korea	Mt. Nam	Temperate	forest	10	3.26	240	Field	parallel independent samples	Homogenized	Both
1399	Kang et al.	2003	South Korea	Mt. Jumbong	Temperate	forest	10	3.19	240	Field	parallel independent samples	Homogenized	Both
1400	Kang et al.	2003	South Korea	Mt. Jumbong	Temperate	forest	10	2.82	240	Field	parallel independent samples	Homogenized	Both
1401	Kang et al.	2003	South Korea	Kwangnung	Temperate	forest	10	3.12	240	Field	parallel independent samples	Homogenized	Both
1402	Kang et al.	2014	China		Temperate	forest	10	3.54	365	Field	warmed consecutively	None	Both
1403	Kang et al.	2014	China		Temperate	forest	11.5	3.473	365	Field	warmed consecutively	None	Both
1404	Kao et al.	2009	Taiwan	Tartarchia Anpu	Subtropical	grassland	10	2.82	365	Field	warmed consecutively	None	Both
1405	Kao et al.	2009	Taiwan	Tartarchia Anpu	Subtropical	forest	10	3.51	365	Field	warmed consecutively	None	Both
1406	Kaur et al.	2010	Australia	Avocet	Subtropical	grassland	21.5	1.42	210	Field	parallel independent samples	Litter removed	Both
1407	Kawahara et al.	1979	Japan	Yaita City	Subtropical	forest	10	2.43	365	Field	warmed consecutively	None	Both
1408	Kawahara et al.	1979	Japan	Yaita City	Subtropical	forest	10	2	365	Field	warmed consecutively	None	Both
1409	Kawahara et al.	1979	Japan	Yaita City	Subtropical	forest	10	2.16	365	Field	warmed consecutively	None	Both
1410	Kawahara et al.	1979	Japan	Yaita City	Subtropical	forest	10	2.48	365	Field	warmed consecutively	None	Both
1411	Keith et al.	1997	Australia	Brindabella	Temperate	forest	5	1.25	365	Field	warmed consecutively	Fertilized	Both
1412	Keith et al.	1997	Australia	Brindabella	Temperate	forest	10	1.45	365	Field	warmed consecutively	Fertilized	Both
1413	Keith et al.	1997	Australia	Brindabella	Temperate	forest	15	1.69	365	Field	warmed consecutively	Fertilized	Both
1414	Keith et al.	1997	Australia	Brindabella	Temperate	forest	10	1.77	365	Field	warmed consecutively	Fertilized	Both
1415	Kellman et al.	2007	Canada	Nova Scotia	Temperate	grassland	10	2.52	1215	Field	parallel independent samples	None	Both
1416	Kellman et al.	2007	Canada	Nova Scotia	Temperate	forest	10	2.27	1215	Field	parallel independent samples	None	Both
1417	Kellman et al.	2007	Canada	Nova Scotia	Temperate	grassland	10	2.42	1215	Field	parallel independent samples	None	Both
1418	Kellman et al.	2007	Canada	Nova Scotia	Temperate	forest	10	2.17	1215	Field	parallel independent samples	None	Both
1419	Kelsey et al.	2012	USA	West Twin Creek	Boreal	forest	8	1.82	150	Field	warmed consecutively	None	Both
1420	Khomik et al.	2006	Canada	Groundhog River Flux Station	Temperate	forest	10	3.6	365	Field	warmed consecutively	None	Both
1421	Kim et al.	1992	USA	Chippewa NF-Bog Lake	Temperate	wetland	15	4.17	365	Field	warmed consecutively	Clipped Plants	Both
1422	Kim et al.	2003	USA	Caribou-Poker Creeks Research Watershed	Boreal	forest	15	1	150	Field	parallel independent samples	None	Both
1423	Kim et al.	2003	USA	Caribou-Poker Creeks Research Watershed	Boreal	forest	15	2.52	150	Field	parallel independent samples	None	Both
1424	Kim et al.	2003	USA	Caribou-Poker Creeks Research Watershed	Boreal	forest	15	3.49	150	Field	parallel independent samples	None	Both
1425	Kim et al.	2003	USA	Caribou-Poker Creeks Research Watershed	Boreal	forest	15	3.09	150	Field	parallel independent samples	None	Both
1426	Kim et al.	2003	USA	Caribou-Poker Creeks Research Watershed	Boreal	forest	15	1.18	150	Field	parallel independent samples	None	Both
1427	Kim et al.	2003	USA	Caribou-Poker Creeks Research Watershed	Boreal	forest	15	2.52	150	Field	parallel independent samples	None	Both
1428	Kim et al.	2003	USA	Caribou-Poker Creeks Research Watershed	Boreal	forest	15	2.43	150	Field	parallel independent samples	None	Both
1429	Kim et al.	2003	USA	Caribou-Poker Creeks Research Watershed	Boreal	forest	15	2.36	150	Field	parallel independent samples	None	Both
1430	Kim et al.	2009	South Korea	Experimental Forest of Kangwon National University	Temperate	forest	12.5	3.77	750	Field	warmed consecutively	None	Both
1431	Kim et al.	2010	South Korea	Gwangneung Experimental Forest	Temperate	forest	10	3.8	150	Field	parallel independent samples	None	Both
1432	Kim et al.	2010	South Korea	Gwangneung Experimental Forest	Temperate	forest	10	4	365	Field	parallel independent samples	None	Both
1433	Kim et al.	2010	South Korea	Gwangneung Experimental Forest	Temperate	forest	10	3.5	365	Field	parallel independent samples	None	Both
1434	Kim et al.	2011	Japan	Teshio Experimental Forest	Temperate	forest	12.5	3.1	180	Field	parallel independent samples	Clipped Plants	Both
1435	Kim et al.	2011	Japan	Teshio Experimental Forest	Temperate	forest	12.5	4	180	Field	parallel independent samples	Clipped Plants	Both
1436	Kim et al.	2011	Japan	Teshio Experimental Forest	Temperate	forest	12.5	3.3	180	Field	parallel independent samples	Clipped Plants	Both
1437	Kim et al.	2013	USA	BS2	Boreal	forest	10	3.2	450	Field	warmed consecutively	None	Both
1438	King et al.	2004	Italy	Tuscania, POPFACE	Subtropical	forest	10	2.5	1460	Field	parallel independent samples	None	Both
1439	King et al.	2004	Italy	Tuscania, POPFACE	Subtropical	forest	10	2.4	1460	Field	parallel independent samples	None	Both
1440	King et al.	2004	Italy	Tuscania, POPFACE	Subtropical	forest	10	2.4	1460	Field	parallel independent samples	None	Both
1441	King et al.	2004	Italy	Tuscania, POPFACE	Subtropical	forest	10	2.4	1460	Field	parallel independent samples	None	Both
1442	King et al.	2004	Italy	Tuscania, POPFACE	Subtropical	forest	10	2.3	1460	Field	parallel independent samples	None	Both
1443	King et al.	2004	Italy	Tuscania, POPFACE	Subtropical	forest	10	2.2	1460	Field	parallel independent samples	None	Both
1444	King et al.	2004	Italy	Tuscania, POPFACE	Subtropical	forest	10	2.2	1460	Field	parallel independent samples	None	Both
1445	King et al.	2004	Italy	Tuscania, POPFACE	Subtropical	forest	10	2.1	1460	Field	parallel independent samples	None	Both
1446	King et al.	2004	Italy	Tuscania, POPFACE	Subtropical	forest	10	2	1460	Field	parallel independent samples	None	Both
1447	King et al.	2004	Italy	Tuscania, POPFACE	Subtropical	forest	10	2	1460	Field	parallel independent samples	None	Both
1448	King et al.	2004	Italy	Tuscania, POPFACE	Subtropical	forest	10	2	1460	Field	parallel independent samples	None	Both
1449	King et al.	2004	Italy	Tuscania, POPFACE	Subtropical	forest	10	2	1460	Field	parallel independent samples	None	Both
1450	King et al.	2004	USA	Durham, FACTS-I	Subtropical	forest	15	3.4	1460	Field	parallel independent samples	None	Both
1451	King et al.	2004	USA	Durham, FACTS-I	Subtropical	forest	15	3.2	1460	Field	parallel independent samples	None	Both
1452	King et al.	2004	USA	Durham, FACTS-I	Subtropical	forest	15	2.9	1460	Field	parallel independent samples	None	Both
1453	King et al.	2004	USA	Durham, FACTS-I	Subtropical	forest	15	2.8	1460	Field	parallel independent samples	None	Both
1454	King et al.	2004	USA	Durham, FACTS-I	Subtropical	forest	15	2.7	1460	Field	parallel independent samples	None	Both
1455	King et al.	2004	USA	Durham, FACTS-I	Subtropical	forest	15	2.7	1460	Field	parallel independent samples	None	Both
1456	King et al.	2004	USA	Durham, FACTS-I	Subtropical	forest	15	2.6	1460	Field	parallel independent samples	None	Both
1457	King et al.	2004	USA	Durham, FACTS-I	Subtropical	forest	15	2.6	1460	Field	parallel independent samples	None	Both
1458	King et al.	2004	USA	Durham, FACTS-I	Subtropical	forest	15	2.3	1460	Field	parallel independent samples	None	Both
1459	King et al.	2004	USA	Durham, FACTS-I	Subtropical	forest	15	2.3	1460	Field	parallel independent samples	None	Both
1460	King et al.	2004	USA	Durham, FACTS-I	Subtropical	forest	15	2.1	1460	Field	parallel independent samples	None	Both
1461	King et al.	2004	USA	Durham, FACTS-I	Subtropical	forest	15	2.1	1460	Field	parallel independent samples	None	Both
1462	King et al.	2004	USA	Oak Ridge	Temperate	forest	15	2.6	1460	Field	parallel independent samples	None	Both
1463	King et al.	2004	USA	Oak Ridge	Temperate	forest	15	2.3	1460	Field	parallel independent samples	None	Both
1464	King et al.	2004	USA	Oak Ridge	Temperate	forest	15	2.2	1460	Field	parallel independent samples	None	Both
1465	King et al.	2004	USA	Oak Ridge	Temperate	forest	15	2.2	1460	Field	parallel independent samples	None	Both
1466	King et al.	2004	USA	Oak Ridge	Temperate	forest	15	2.2	1460	Field	parallel independent samples	None	Both
1467	King et al.	2004	USA	Oak Ridge	Temperate	forest	15	2.1	1460	Field	parallel independent samples	None	Both
1468	King et al.	2004	USA	Oak Ridge	Temperate	forest	15	2	1460	Field	parallel independent samples	None	Both
1469	King et al.	2004	USA	Oak Ridge	Temperate	forest	15	1.9	1460	Field	parallel independent samples	None	Both
1470	King et al.	2004	USA	Oak Ridge	Temperate	forest	15	1.9	1460	Field	parallel independent samples	None	Both
1471	King et al.	2004	USA	Oak Ridge	Temperate	forest	15	1.9	1460	Field	parallel independent samples	None	Both
1472	King et al.	2004	USA	Rhinelander, FACTS-II	Temperate	forest	15	4.1	1460	Field	parallel independent samples	None	Both
1473	King et al.	2004	USA	Rhinelander, FACTS-II	Temperate	forest	15	3.2	1460	Field	parallel independent samples	None	Both
1474	King et al.	2004	USA	Rhinelander, FACTS-II	Temperate	forest	15	2.8	1460	Field	parallel independent samples	None	Both
1475	King et al.	2004	USA	Rhinelander, FACTS-II	Temperate	forest	15	2.6	1460	Field	parallel independent samples	None	Both
1476	King et al.	2004	USA	Rhinelander, FACTS-II	Temperate	forest	15	2.6	1460	Field	parallel independent samples	None	Both
1477	King et al.	2004	USA	Rhinelander, FACTS-II	Temperate	forest	15	2.6	1460	Field	parallel independent samples	None	Both
1478	King et al.	2004	USA	Rhinelander, FACTS-II	Temperate	forest	15	2.5	1460	Field	parallel independent samples	None	Both
1479	King et al.	2004	USA	Rhinelander, FACTS-II	Temperate	forest	15	1.7	1460	Field	parallel independent samples	None	Both
1480	King et al.	2004	USA	Rhinelander, FACTS-II	Temperate	forest	15	1.7	1460	Field	parallel independent samples	None	Both
1481	King et al.	2004	USA	Rhinelander, FACTS-II	Temperate	forest	15	1.5	1460	Field	parallel independent samples	None	Both
1482	King et al.	2004	USA	Rhinelander, FACTS-II	Temperate	forest	15	1.5	1460	Field	parallel independent samples	None	Both
1483	King et al.	2004	USA	Rhinelander, FACTS-II	Temperate	forest	15	1.5	1460	Field	parallel independent samples	None	Both
1484	King et al.	2004	USA	Rhinelander, FACTS-II	Temperate	forest	15	1.5	1460	Field	parallel independent samples	None	Both
1485	King et al.	2004	USA	Rhinelander, FACTS-II	Temperate	forest	15	1.3	1460	Field	parallel independent samples	None	Both
1486	King et al.	2004	USA	Rhinelander, FACTS-II	Temperate	forest	15	1.2	1460	Field	parallel independent samples	None	Both
1487	Kirita et al.	1971	Japan	Nara	Subtropical	forest	10	2.9	365	Field	warmed consecutively	None	Both
1488	Kirita et al.	1971	Japan	Minamata	Subtropical	forest	10	2.9	365	Field	warmed consecutively	None	Both
1489	Klimek et al.	2016	Poland	Beskidy Mountains	Temperate	forest	5	3.21	7	Lab	parallel independent samples	Wetting	Both
1490	Klimek et al.	2016	Poland	Beskidy Mountains	Temperate	forest	5	3.08	7	Lab	parallel independent samples	Wetting	Both
1491	Klimek et al.	2016	Poland	Beskidy Mountains	Temperate	forest	5	2.79	7	Lab	parallel independent samples	Wetting	Both
1492	Klimek et al.	2016	Poland	Beskidy Mountains	Temperate	forest	15	2.45	7	Lab	parallel independent samples	Wetting	Both
1493	Klimek et al.	2016	Poland	Beskidy Mountains	Temperate	forest	15	2.35	0.2	Lab	parallel independent samples	Wetting	Both
1494	Klimek et al.	2016	Poland	Beskidy Mountains	Temperate	forest	15	2.31	0.2	Lab	parallel independent samples	Wetting	Both
1495	Klimek et al.	2016	Poland	Beskidy Mountains	Temperate	forest	25	1.93	0.2	Lab	parallel independent samples	Wetting	Both
1496	Klimek et al.	2016	Poland	Beskidy Mountains	Temperate	forest	25	1.84	0.2	Lab	parallel independent samples	Wetting	Both
1497	Klimek et al.	2016	Poland	Beskidy Mountains	Temperate	forest	25	1.94	0.2	Lab	parallel independent samples	Wetting	Both
1498	Klimek et al.	2017	Finland	Arctic Cycle	Temperate	forest	16	1.4	0.2	Lab	parallel independent samples	Wetting	Both
1499	Klimek et al.	2017	Finland	Arctic Cycle	Temperate	forest	16	1.7	0.2	Lab	parallel independent samples	Wetting	Both
1500	Klimek et al.	2017	Finland	Arctic Cycle	Temperate	forest	16	1.7	0.2	Lab	parallel independent samples	Wetting	Both
1501	Klimek et al.	2017	Finland	Arctic Cycle	Temperate	forest	16	1.5	0.2	Lab	parallel independent samples	Wetting	Both
1502	Knapp et al.	1998	USA	Konza Prairie	Temperate	grassland	10	3.49	365	Field	warmed consecutively	None	Both
1503	Knapp et al.	1998	USA	Konza Prairie	Temperate	grassland	10	2.94	365	Field	warmed consecutively	None	Both
1504	Knohl et al.	2008	Germany	National Park Hainich	Temperate	forest	10	3.16	940	Field	warmed consecutively	None	Both
1505	Knohl et al.	2008	Germany	National Park Hainich	Temperate	forest	10	2.97	940	Field	warmed consecutively	None	Both
1506	Knohl et al.	2008	Germany	National Park Hainich	Temperate	forest	10	2.34	940	Field	warmed consecutively	None	Both
1507	Kobziar et al.	2006	USA	Stanislaus National Forest	Subtropical	forest	15	4.08	420	Field	warmed consecutively	None	Both
1508	Kobziar et al.	2006	USA	Stanislaus National Forest	Subtropical	forest	15	2.02	420	Field	warmed consecutively	None	Both
1509	Kobziar et al.	2006	USA	Stanislaus National Forest	Subtropical	forest	15	2.97	420	Field	warmed consecutively	None	Both
1510	Kobziar et al.	2006	USA	Stanislaus National Forest	Subtropical	forest	15	2.8	420	Field	warmed consecutively	None	Both
1511	Kobziar et al.	2006	USA	Stanislaus National Forest	Subtropical	forest	15	2.54	420	Field	warmed consecutively	None	Both
1512	Kobziar et al.	2006	USA	Stanislaus National Forest	Subtropical	forest	15	2.87	420	Field	warmed consecutively	None	Both
1513	Kobziar et al.	2006	USA	Stanislaus National Forest	Subtropical	forest	15	1.95	420	Field	warmed consecutively	None	Both
1514	Kobziar et al.	2006	USA	Stanislaus National Forest	Subtropical	forest	15	2.5	420	Field	warmed consecutively	None	Both
1515	Kobziar et al.	2006	USA	Stanislaus National Forest	Subtropical	forest	15	3.11	420	Field	warmed consecutively	None	Both
1516	Kobziar et al.	2006	USA	Stanislaus National Forest	Subtropical	forest	15	2.56	420	Field	warmed consecutively	None	Both
1517	Kobziar et al.	2006	USA	Stanislaus National Forest	Subtropical	forest	15	2.83	420	Field	warmed consecutively	None	Both
1518	Koch et al.	2007	Austria	Rotmoos Valley	Temperate	grassland	15	2.1	25	Lab	warmed consecutively	None	Both
1519	Koch et al.	2007	Austria	Rotmoos Valley	Temperate	grassland	15	1.9	25	Lab	warmed consecutively	None	Both
1520	Koch et al.	2007	Austria	Rotmoos Valley	Temperate	grassland	15	2	25	Lab	warmed consecutively	None	Both
1521	Koch et al.	2007	Austria	Rotmoos Valley	Temperate	grassland	15	1.86	25	Lab	warmed consecutively	None	Both
1522	Koehler et al.	2009	Panama	Barro Colorado National Monument	Tropical	forest	25.5	3.96	570	Field	warmed consecutively	None	Both
1523	Koehler et al.	2009	Panama	Fortuna Forest Reserve	Tropical	forest	18.5	2.7	570	Field	warmed consecutively	N-Addition	Both
1524	Koh et al.	2009	USA	Clear Springs Wetland-BF	Subtropical	forest	15	1.7	450	Field	warmed consecutively	None	Both
1525	Koizumi et al.	1993	Japan	Tsukuba Science City	Subtropical	agriculture	10	2.2	1095	Field	warmed consecutively	None	Both
1526	Koizumi et al.	1993	Japan	Tsukuba Science City	Subtropical	agriculture	10	1.9	1095	Field	warmed consecutively	None	Both
1527	Koizumi et al.	1993	Japan	Tsukuba Science City	Subtropical	agriculture	10	1.9	1095	Field	warmed consecutively	None	Both
1528	Koizumi et al.	1999	Finland	Agricultural Research Centre of Finland	Boreal	agriculture	15	2.05	365	Field	warmed consecutively	None	Both
1529	Koizumi et al.	1999	Finland	Agricultural Research Centre of Finland	Boreal	agriculture	15	1.64	365	Field	warmed consecutively	None	Both
1530	Koizumi et al.	1999	Finland	Agricultural Research Centre of Finland	Boreal	agriculture	10	1.93	365	Field	warmed consecutively	None	Both
1531	Kolari et al.	2009	Finland	SMEAR II	Boreal	forest	10	2.7	2190	Field	warmed consecutively	None	Both
1532	Kong et al.	2014	South Korea		Temperate	forest	10	3.28	365	Field	warmed consecutively	None	Both
1533	Kotroczo et al.	2008	Hungary	Bükk National Park	Temperate	forest	10	2.72	1825	Field	warmed consecutively	None	Both
1534	Kotroczo et al.	2008	Hungary	Bükk National Park	Temperate	forest	10	2.63	1825	Field	warmed consecutively	None	Both
1535	Kotroczo et al.	2008	Hungary	Bükk National Park	Temperate	forest	10	2.57	1825	Field	warmed consecutively	None	Both
1536	Kotroczo et al.	2008	Hungary	Bükk National Park	Temperate	forest	10	2.55	1825	Field	warmed consecutively	None	Both
1537	Kotroczo et al.	2008	Hungary	Bükk National Park	Temperate	forest	10	2.53	1825	Field	warmed consecutively	None	Both
1538	Kotroczo et al.	2008	Hungary	Bükk National Park	Temperate	forest	10	1.3	1825	Field	warmed consecutively	None	Both
1539	Kotroczo et al.	2008	Hungary	Bükk National Park	Temperate	forest	10	1.25	1825	Field	warmed consecutively	None	Both
1540	Kotroczo et al.	2008	Hungary	Bükk National Park	Temperate	forest	10	1.24	1825	Field	warmed consecutively	None	Both
1541	Kotroczo et al.	2008	Hungary	Bükk National Park	Temperate	forest	10	1.21	1825	Field	warmed consecutively	None	Both
1542	Kotroczo et al.	2008	Hungary	Bükk National Park	Temperate	forest	10	1.21	1825	Field	warmed consecutively	None	Both
1543	Kotroczo et al.	2008	Hungary	Bükk National Park	Temperate	forest	10	2.41	1825	Field	warmed consecutively	None	Both
1544	Kowalski et al.	2003	France	Bilos	Temperate	forest	10	2.64	750	Field	parallel independent samples	None	Both
1545	Kowalski et al.	2003	France	Bilos	Temperate	forest	12.5	2.37	750	Field	parallel independent samples	None	Both
1546	Kowalski et al.	2003	France	Bilos	Temperate	forest	17	1.85	750	Field	parallel independent samples	None	Both
1547	Kucera and Kirkham	1971	USA	University of Missouri Prairie Station	Temperate	grassland	17.5	2	365	Field	warmed consecutively	None	Both
1548	Kucharik et al.	2006	USA	Madison	Temperate	grassland	12.5	2.96	395	Field	warmed consecutively	None	Both
1549	Kucharik et al.	2006	USA	Madison	Temperate	grassland	12.5	2.64	395	Field	warmed consecutively	None	Both
1550	Kucharik et al.	2006	USA	Madison	Temperate	grassland	12.5	3.27	395	Field	warmed consecutively	None	Both
1551	Kucharik et al.	2006	USA	Madison	Temperate	grassland	12.5	2.9	395	Field	warmed consecutively	None	Both
1552	Kucharik et al.	2006	USA	Madison	Temperate	grassland	12.5	2.49	395	Field	warmed consecutively	None	Both
1553	Kucharik et al.	2006	USA	Madison	Temperate	grassland	12.5	2.58	395	Field	warmed consecutively	None	Both
1554	Kucharik et al.	2006	USA	Madison	Temperate	grassland	12.5	3.46	395	Field	warmed consecutively	None	Both
1555	Kucharik et al.	2006	USA	Madison	Temperate	grassland	12.5	2.62	395	Field	warmed consecutively	None	Both
1556	Kukumägi et al.	2014	Estonia	Järvselja Experimental forest District	Boreal	forest	10	4.482	270	Field	warmed consecutively	Plants Cutted	Both
1557	Kukumägi et al.	2014	Estonia	Järvselja Experimental forest District	Boreal	forest	10	4.349	270	Field	warmed consecutively	Plants Cutted	Both
1558	Kukumägi et al.	2014	Estonia	Järvselja Experimental forest District	Boreal	forest	10	4.349	270	Field	warmed consecutively	Plants Cutted	Both
1559	La Scala et al.	2005	Brazil	FCAV-UNESP	Tropical	agriculture	22	1.68	25	Field	parallel independent samples	Tillage	Both
1560	La Scala et al.	2005	Brazil	FCAV-UNESP	Tropical	agriculture	22	2.11	25	Field	parallel independent samples	Tillage	Both
1561	La Scala et al.	2005	Brazil	FCAV-UNESP	Tropical	agriculture	22	2.2	25	Field	parallel independent samples	Tillage	Both
1562	La Scala et al.	2005	Brazil	FCAV-UNESP	Tropical	agriculture	22	2.31	25	Field	parallel independent samples	Tillage	Both
1563	Laganiere et al.	2012	Canada	Abitibi-James Bay	Boreal	forest	7.5	2.61	180	Field	warmed consecutively	Roots removed	Heterotrophic
1564	Laganiere et al.	2012	Canada	Abitibi-James Bay	Boreal	forest	7.5	2.23	365	Field	warmed consecutively	Roots removed	Heterotrophic
1565	Laganiere et al.	2012	Canada	Abitibi-James Bay	Boreal	forest	7.5	2.07	180	Field	warmed consecutively	Roots removed	Heterotrophic
1566	Laganiere et al.	2012	Canada	Abitibi-James Bay	Boreal	forest	7.5	2.7	365	Field	warmed consecutively	Roots removed	Heterotrophic
1567	Laganiere et al.	2012	Canada	Abitibi-James Bay	Boreal	forest	7.5	1.94	180	Field	warmed consecutively	Roots removed	Heterotrophic
1568	Laganiere et al.	2012	Canada	Abitibi-James Bay	Boreal	forest	7.5	2.04	365	Field	warmed consecutively	Roots removed	Heterotrophic
1569	Laganiere et al.	2012	Canada	Abitibi-James Bay region	Boreal	forest	7.5	2.61	180	Field	warmed consecutively	Roots removed	Heterotrophic
1570	Laganiere et al.	2012	Canada	Abitibi-James Bay region	Boreal	forest	7.5	2.7	365	Field	warmed consecutively	Roots removed	Heterotrophic
1571	Laganiere et al.	2012	Canada	Abitibi-James Bay region	Boreal	forest	7.5	2.23	180	Field	warmed consecutively	Roots removed	Heterotrophic
1572	Laganiere et al.	2012	Canada	Abitibi-James Bay region	Boreal	forest	7.5	1.94	365	Field	warmed consecutively	Roots removed	Heterotrophic
1573	Laganiere et al.	2012	Canada	Abitibi-James Bay region	Boreal	forest	7.5	2.07	180	Field	warmed consecutively	Roots removed	Heterotrophic
1574	Laganiere et al.	2012	Canada	Abitibi-James Bay region	Boreal	forest	7.5	2.04	365	Field	warmed consecutively	Roots removed	Heterotrophic
1575	Lagomarsino et al.	2013	Italy	POP-EuroFACE experimental plantation	Temperate	forest	10	4.116	530	Field	warmed consecutively	FACE-CO2	Both
1576	Lagomarsino et al.	2013	Italy	POP-EuroFACE experimental plantation	Temperate	forest	10	3.892	530	Field	warmed consecutively	FACE-CO3	Both
1577	Lagomarsino et al.	2013	Italy	POP-EuroFACE experimental plantation	Temperate	forest	10	3.755	530	Field	warmed consecutively	FACE-CO4	Both
1578	Lagomarsino et al.	2013	Italy	POP-EuroFACE experimental plantation	Temperate	forest	10	3.615	530	Field	warmed consecutively	FACE-CO5	Both
1579	Lagomarsino et al.	2013	Italy	POP-EuroFACE experimental plantation	Temperate	forest	10	3.387	530	Field	warmed consecutively	FACE-CO6	Both
1580	Lagomarsino et al.	2013	Italy	POP-EuroFACE experimental plantation	Temperate	forest	10	3.357	530	Field	warmed consecutively	FACE-CO7	Both
1581	Lagomarsino et al.	2013	Italy	POP-EuroFACE experimental plantation	Temperate	forest	10	2.612	530	Field	warmed consecutively	FACE-CO8	Both
1582	Lagomarsino et al.	2013	Italy	POP-EuroFACE experimental plantation	Temperate	forest	10	2.452	530	Field	warmed consecutively	FACE-CO9	Both
1583	Lai et al.	2012	China	Fukang Station of Desert Ecology	Boreal	grassland	25	1.36	150	Field	warmed consecutively	Plant/Roots removed	Heterotrophic
1584	Lai et al.	2012	China	Fukang Station of Desert Ecology	Boreal	grassland	25	1.36	150	Field	warmed consecutively	Plant/Roots removed	Heterotrophic
1585	Lai et al.	2012	China	Fukang Station of Desert Ecology	Subtropical	grassland	25	1.33	150	Field	warmed consecutively	Plant/Roots removed	Heterotrophic
1586	Lai et al.	2012	China	Fukang Station of Desert Ecology	Subtropical	grassland	25	1.2	150	Field	warmed consecutively	Plant/Roots removed	Heterotrophic
1587	Lai et al.	2012	China	Fukang Station of Desert Ecology	Subtropical	grassland	25	1.15	150	Field	warmed consecutively	Plant/Roots removed	Heterotrophic
1588	Lai et al.	2012	China	Fukang Station of Desert Ecology	Subtropical	grassland	25	1.14	150	Field	warmed consecutively	Plant/Roots removed	Heterotrophic
1589	Lai et al.	2012	China	Fukang Station of Desert Ecology	Subtropical	grassland	25	1.12	150	Field	warmed consecutively	Plant/Roots removed	Heterotrophic
1590	Lai et al.	2012	China	Fukang Station of Desert Ecology	Subtropical	grassland	25	1.34	150	Field	warmed consecutively	Plant/Roots removed	Heterotrophic
1591	Lai et al.	2012	China	Fukang Station of Desert Ecology	Subtropical	grassland	25	1.33	150	Field	warmed consecutively	Plant/Roots removed	Heterotrophic
1592	Lai et al.	2012	China	Fukang Station of Desert Ecology	Subtropical	grassland	25	1.21	150	Field	warmed consecutively	Plant/Roots removed	Heterotrophic
1593	Lai et al.	2013	China	Fukang Station of Desert Ecology	Temperate	grassland	26	2.12	120	Field	warmed consecutively	Litter removed	Both
1594	Lai et al.	2013	China	Fukang Station of Desert Ecology	Temperate	grassland	26	1.91	120	Field	warmed consecutively	Litter removed	Both
1595	Lai et al.	2013	China	Fukang Station of Desert Ecology	Temperate	grassland	26	1.85	120	Field	warmed consecutively	Litter removed	Both
1596	Lai et al.	2013	China	Fukang Station of Desert Ecology	Temperate	grassland	26	1.83	120	Field	warmed consecutively	Litter removed	Both
1597	Lai et al.	2013	China	Fukang Station of Desert Ecology	Temperate	grassland	26	1.78	120	Field	warmed consecutively	Litter removed	Both
1598	Lai et al.	2013	China	Fukang Station of Desert Ecology	Temperate	grassland	26	1.62	120	Field	warmed consecutively	Litter removed	Both
1599	Lai et al.	2013	China	Fukang Station of Desert Ecology	Temperate	grassland	26	1.57	120	Field	warmed consecutively	Litter removed	Both
1600	Lai et al.	2013	China	Fukang Station of Desert Ecology	Temperate	grassland	26	1.44	120	Field	warmed consecutively	Litter removed	Both
1601	Lai et al.	2013	China	Fukang Station of Desert Ecology	Temperate	grassland	26	1.32	120	Field	warmed consecutively	Litter removed	Both
1602	Lalonde et al.	2007	Canada	British Columbia Fluxnet Canada	Temperate	forest	10	1.7	395	Field	warmed consecutively	None	Both
1603	Lamade et al.	1996	Benin	Ouidah	Tropical	forest	26.5	2	60	Field	parallel independent samples	None	Both
1604	Lang et al.	2017	China	Xishuangbanna	Tropical	forest	19	1.84	365	Field	warmed consecutively	None	Both
1605	Lang et al.	2017	China	Xishuangbanna	Tropical	forest	19	2.87	365	Field	warmed consecutively	None	Both
1606	Lang et al.	2017	China	Xishuangbanna	Tropical	forest	19	3.11	365	Field	warmed consecutively	None	Both
1607	Lang et al.	2017	China	Xishuangbanna	Tropical	forest	20	1.81	365	Field	warmed consecutively	None	Both
1608	Lang et al.	2017	China	Xishuangbanna	Tropical	forest	20	1.42	365	Field	warmed consecutively	None	Both
1609	Lang et al.	2017	China	Xishuangbanna	Tropical	forest	20	1.73	365	Field	warmed consecutively	None	Both
1610	Lang et al.	2017	China	Xishuangbanna	Tropical	forest	19.5	1.82	365	Field	warmed consecutively	None	Both
1611	Lang et al.	2017	China	Xishuangbanna	Tropical	forest	19.5	1.6	365	Field	warmed consecutively	None	Both
1612	Lang et al.	2017	China	Xishuangbanna	Tropical	forest	19.5	2.23	365	Field	warmed consecutively	None	Both
1613	Lang et al.	2017	China	Xishuangbanna	Tropical	forest	21.5	1.77	365	Field	warmed consecutively	None	Both
1614	Lang et al.	2017	China	Xishuangbanna	Tropical	forest	21.5	2.27	365	Field	warmed consecutively	None	Both
1615	Lang et al.	2017	China	Xishuangbanna	Tropical	forest	21.5	2.32	365	Field	warmed consecutively	None	Both
1616	Lavigne et al.	1997	Canada	BOREAS Study Area	Boreal	forest	7.5	2.53	365	Field	parallel independent samples	None	Both
1617	Lavigne et al.	1997	Canada	BOREAS Study Area	Boreal	forest	7.5	2.46	365	Field	parallel independent samples	None	Both
1618	Lavigne et al.	1997	Canada	BOREAS Study Area	Boreal	forest	7.5	2.32	365	Field	parallel independent samples	None	Both
1619	Lavigne et al.	1997	Canada	BOREAS Study Area	Boreal	forest	12.5	1.68	365	Field	parallel independent samples	None	Both
1620	Lavigne et al.	1997	Canada	BOREAS Study Area	Boreal	forest	12.5	3.53	365	Field	parallel independent samples	None	Both
1621	Lavigne et al.	2003	Canada	Lavigne-warm	Temperate	forest	10	3	270	Field	warmed consecutively	Vegetation removed	Both
1622	Lavigne et al.	2003	Canada	Lavigne-warm	Temperate	forest	10	2.86	270	Field	warmed consecutively	Vegetation removed	Both
1623	Lavigne et al.	2003	Canada	Lavigne-cool	Temperate	forest	10	1.66	270	Field	warmed consecutively	Vegetation removed	Both
1624	Lavigne et al.	2003	Canada	Lavigne-warm	Temperate	forest	10	2.78	270	Field	warmed consecutively	Vegetation removed	Both
1625	Lavigne et al.	2003	Canada	Lavigne-warm	Temperate	forest	10	2.5	270	Field	warmed consecutively	Vegetation removed	Both
1626	Lavigne et al.	2003	Canada	Lavigne-midtransect	Temperate	forest	10	3.49	270	Field	warmed consecutively	Vegetation removed	Both
1627	Lavigne et al.	2003	Canada	Lavigne-midtransect	Temperate	forest	10	3.45	270	Field	warmed consecutively	Vegetation removed	Both
1628	Lavigne et al.	2003	Canada	Lavigne-midtransect	Temperate	forest	10	2.76	270	Field	warmed consecutively	Vegetation removed	Both
1629	Lavigne et al.	2003	Canada	Lavigne-midtransect	Temperate	forest	10	1.68	270	Field	warmed consecutively	Vegetation removed	Both
1630	Lavigne et al.	2003	Canada	Lavigne-cool	Temperate	forest	10	2.22	270	Field	warmed consecutively	Vegetation removed	Both
1631	Lavigne et al.	2003	Canada	Lavigne-cool	Temperate	forest	10	2.15	270	Field	warmed consecutively	Vegetation removed	Both
1632	Lavigne et al.	2004	Canada	Acadia Research Forest	Temperate	forest	10	3	1460	Field	warmed consecutively	Vegetation removed	Both
1633	Lavigne et al.	2004	Canada	Acadia Research Forest	Temperate	forest	10	2.66	1460	Field	warmed consecutively	Vegetation removed	Both
1634	Lavigne et al.	2004	Canada	Acadia Research Forest	Temperate	forest	10	2.51	1460	Field	warmed consecutively	Vegetation removed	Both
1635	Law et al. (a)	1999	USA	Metolius	Temperate	forest	10	1.8	365	Field	parallel independent samples	Vegetation removed	Both
1636	Law et al. (a)	1999	USA	Metolius	Temperate	forest	10	2.1	365	Field	parallel independent samples	Vegetation removed	Both
1637	Law et al. (b)	1999	USA	Metiolus-O	Temperate	forest	10	1.8	365	Field	parallel independent samples	Vegetation removed	Both
1638	Law et al. (b)	1999	USA	Metiolus-O	Temperate	forest	10	2.1	365	Field	parallel independent samples	Vegetation removed	Both
1639	Lee et al.	2002	Japan	Mount Norikura	Temperate	forest	10	3.1	365	Field	parallel independent samples	Vegetation removed	Both
1640	Lee et al.	2006	Japan	Takayama Experimental Field Station	Temperate	forest	10	3.78	365	Field	warmed consecutively	None	Autotrophic
1641	Lee et al.	2007	USA	Moody County	Temperate	agriculture	10	2.8	810	Field	warmed consecutively	Vegetation removed	Both
1642	Lee et al.	2007	USA	Moody County	Temperate	agriculture	10	2.7	810	Field	warmed consecutively	Vegetation removed	Both
1643	Lee et al.	2007	USA	Moody County	Temperate	agriculture	10	2.67	810	Field	warmed consecutively	Vegetation removed	Both
1644	Lee et al.	2007	USA	Moody County	Temperate	agriculture	10	2.97	810	Field	warmed consecutively	Vegetation removed	Both
1645	Lee et al.	2007	USA	Moody County	Temperate	agriculture	10	3.02	810	Field	warmed consecutively	Vegetation removed	Both
1646	Lee et al.	2007	USA	Moody County	Temperate	agriculture	10	3.08	810	Field	warmed consecutively	Vegetation removed	Both
1647	Lee et al.	2007	USA	Moody County	Temperate	agriculture	10	3.05	810	Field	warmed consecutively	Vegetation removed	Both
1648	Lee et al.	2007	USA	Moody County	Temperate	agriculture	10	2.6	810	Field	warmed consecutively	Vegetation removed	Both
1649	Lee et al.	2007	USA	Moody County	Temperate	agriculture	10	2.34	810	Field	warmed consecutively	Vegetation removed	Both
1650	Lee et al.	2007	USA	Moody County	Temperate	agriculture	10	3	810	Field	warmed consecutively	Vegetation removed	Both
1651	Lee et al.	2007	USA	Moody County	Temperate	agriculture	10	3	810	Field	warmed consecutively	Vegetation removed	Both
1652	Lee et al.	2007	USA	Moody County	Temperate	agriculture	10	2.92	810	Field	warmed consecutively	Vegetation removed	Both
1653	Lee et al.	2007	USA	Moody County	Temperate	agriculture	10	3.76	810	Field	warmed consecutively	Vegetation removed	Both
1654	Lee et al.	2007	USA	Moody County	Temperate	agriculture	10	3.69	810	Field	warmed consecutively	Vegetation removed	Both
1655	Lee et al.	2007	USA	Moody County	Temperate	agriculture	10	3.32	810	Field	warmed consecutively	Vegetation removed	Both
1656	Lee et al.	2008	Japan	Cedar Plantation	Subtropical	forest	10	1.79	200	Field	warmed consecutively	None	Both
1657	Lee et al.	2008	Japan	Cedar Plantation	Subtropical	forest	10	1.94	200	Field	warmed consecutively	None	Both
1658	Lee et al.	2014	South Korea		Temperate	grassland	17.5	3.691	120	Field	warmed consecutively	None	Both
1659	Lee et al.	2014	South Korea		Temperate	grassland	17.5	2.234	120	Field	warmed consecutively	None	Both
1660	Lee et al.	2014	South Korea		Temperate	grassland	17.5	1.891	120	Field	warmed consecutively	None	Both
1661	Lee et al. (a)	2003	USA	West Florida Research and Education Center	Subtropical	forest	23	2.79	210	Field	warmed consecutively	None	Both
1662	Lee et al. (a)	2003	USA	West Florida Research and Education Center	Subtropical	agriculture	23	3.95	210	Field	warmed consecutively	None	Both
1663	Lee et al. (a)	2003	USA	West Florida Research and Education Center	Subtropical	agriculture	23	4.33	210	Field	warmed consecutively	None	Both
1664	Lee et al. (a)	2003	USA	West Florida Research and Education Center	Subtropical	forest	23	1.82	210	Field	warmed consecutively	None	Both
1665	Lee et al. (a)	2010	South Korea	Gwangneung Forest	Temperate	forest	10	4.48	365	Field	warmed consecutively	Vegetation removed	Both
1666	Lee et al. (a)	2010	South Korea	Gwangneung Forest	Temperate	forest	10	3.67	365	Field	warmed consecutively	Vegetation removed	Both
1667	Lee et al. (a)	2010	South Korea	Gwangneung Forest	Temperate	forest	10	3.67	365	Field	warmed consecutively	Vegetation removed	Both
1668	Lee et al. (a)	2010	South Korea	Gwangneung Forest	Temperate	forest	10	3.32	365	Field	warmed consecutively	Vegetation removed	Both
1669	Lee et al. (b)	2003	USA	Santa Rosa-cottonwood	Subtropical	forest	10	1.49	365	Field	warmed consecutively	None	Both
1670	Lee et al. (b)	2003	USA	Santa Rosa-pine	Subtropical	forest	10	1.22	365	Field	warmed consecutively	None	Both
1671	Lee et al. (b)	2010	South Korea	Gwangeung Forest	Temperate	forest	10	4.35	900	Field	warmed consecutively	Vegetation removed	Both
1672	Lee et al. (b)	2010	South Korea	Gwangeung Forest	Temperate	forest	10	3.63	900	Field	warmed consecutively	Vegetation removed	Both
1673	Lee et al. (b)	2010	South Korea	Gwangeung Forest	Temperate	forest	10	3.49	900	Field	warmed consecutively	Vegetation removed	Both
1674	Lee et al. (b)	2010	South Korea	Gwangeung Forest	Temperate	forest	10	3.22	900	Field	warmed consecutively	Vegetation removed	Both
1675	Lee et al. (c)	2003	USA	Santa Rosa-pine	Subtropical	forest	15	1.49	365	Field	warmed consecutively	None	Both
1676	Lessard et al.	1994	Canada	agriculture Canada Greentbelt Farm	Temperate	forest	15	2.24	200	Field	parallel independent samples	None	Both
1677	Lessard et al.	1994	Canada	agriculture Canada Greentbelt Farm	Temperate	agriculture	15	2	200	Field	parallel independent samples	None	Both
1678	Lessard et al.	1994	Canada	agriculture Canada Greentbelt Farm	Temperate	forest	10	4.25	200	Field	parallel independent samples	None	Both
1679	Lessard et al.	1994	Canada	agriculture Canada Greentbelt Farm	Temperate	agriculture	10	3	200	Field	parallel independent samples	None	Both
1680	Li et al.	2008	China	Tianlong Mountain-1F	Temperate	forest	10	2.39	270	Field	warmed consecutively	No Vegetation	Both
1681	Li et al.	2008	China	Tianlong Mountain-1F	Temperate	forest	10	1.48	270	Field	warmed consecutively	No Vegetation	Both
1682	Li et al.	2008	China	Tianlong Mountain-2S	Temperate	grassland	10	2.37	270	Field	warmed consecutively	No Vegetation	Both
1683	Li et al.	2008	China	Tianlong Mountain-2S	Temperate	grassland	10	1.81	270	Field	warmed consecutively	No Vegetation	Both
1684	Li et al.	2008	China	Tianlong Mountain-3G	Temperate	grassland	10	2.55	270	Field	warmed consecutively	No Vegetation	Both
1685	Li et al.	2008	China	Tianlong Mountain-3G	Temperate	grassland	10	2.08	270	Field	warmed consecutively	No Vegetation	Both
1686	Li et al.	2008	China	Tianlong Mountain-11B	Temperate	agriculture	10	2.48	270	Field	warmed consecutively	No Vegetation	Both
1687	Li et al.	2008	China	Tianlong Mountain-11B	Temperate	agriculture	10	2.2	270	Field	warmed consecutively	No Vegetation	Both
1688	Li et al.	2008	China	Tianlong Mountain-4S	Temperate	grassland	10	3.46	270	Field	warmed consecutively	No Vegetation	Both
1689	Li et al.	2008	China	Tianlong Mountain-10F	Temperate	forest	10	3.56	270	Field	warmed consecutively	No Vegetation	Both
1690	Li et al.	2008	China	Tianlong Mountain-9G	Temperate	grassland	10	4.12	270	Field	warmed consecutively	No Vegetation	Both
1691	Li et al.	2008	China	Tianlong Mountain-8S	Temperate	grassland	10	4.05	270	Field	warmed consecutively	No Vegetation	Both
1692	Li et al.	2008	China	Tianlong Mountain-8S	Temperate	grassland	10	3.57	270	Field	warmed consecutively	No Vegetation	Both
1693	Li et al.	2008	China	Tianlong Mountain-6F	Temperate	forest	10	4.45	270	Field	warmed consecutively	No Vegetation	Both
1694	Li et al.	2008	China	Tianlong Mountain-7G	Temperate	grassland	10	4.08	270	Field	warmed consecutively	No Vegetation	Both
1695	Li et al.	2008	China	Tianlong Mountain-6F	Temperate	forest	10	4.04	270	Field	warmed consecutively	No Vegetation	Both
1696	Li et al.	2009	China	National Field Research Station, Hailun	Temperate	grassland	22.5	1.64	150	Field	warmed consecutively	None	Both
1697	Li et al.	2010	China	Neosinocalamus affinis plantation	Subtropical	forest	15	2.95	180	Field	warmed consecutively	None	Both
1698	Li et al.	2010	China	Neosinocalamus affinis plantation	Subtropical	forest	15	2.71	180	Field	warmed consecutively	Fertilized	Both
1699	Li et al.	2010	China	Neosinocalamus affinis plantation	Subtropical	forest	15	3.72	180	Field	warmed consecutively	Fertilized	Both
1700	Li et al.	2010	China	Neosinocalamus affinis plantation	Subtropical	forest	15	3.51	180	Field	warmed consecutively	Fertilized	Both
1701	Li et al.	2012	USA	EAM	Temperate	forest	15	2.19	730	Field	warmed consecutively	None	Both
1702	Li et al.	2012	USA	UAM	Temperate	forest	15	1.77	730	Field	warmed consecutively	None	Both
1703	Li et al.	2012	USA	NHM	Temperate	forest	15	1.73	730	Field	warmed consecutively	None	Both
1704	Li et al. (b)	2005	China	Ecological Experiment Station of Mire-Wetland	Temperate	wetland	15	1.82	150	Field	warmed consecutively	Clipped Vegetation	Both
1705	Li et al. (c)	2013	China	Semi-Arid Climate and Environment Observatory	Temperate	grassland	20	1.491	270	Field	warmed consecutively	None	Both
1706	Li et al. (c)	2013	China	Semi-Arid Climate and Environment Observatory	Temperate	grassland	20	1.223	270	Field	warmed consecutively	None	Both
1707	Liang et al.	2004	Japan	Tomakomai	Temperate	forest	15	3	125	Field	parallel independent samples	None	Both
1708	Liang et al.	2004	Japan	Tomakomai	Temperate	forest	15	2.72	125	Field	parallel independent samples	None	Both
1709	Liang et al.	2004	Japan	Tomakomai	Temperate	forest	15	1.82	125	Field	parallel independent samples	None	Both
1710	Liang et al.	2004	Japan	Tomakomai	Temperate	forest	15	1.65	125	Field	parallel independent samples	None	Both
1711	Liang et al.	2013	China	Dinghushan forest Ecosystem Research Station	Subtropical	forest	17.5	1.88	730	Field	warmed consecutively	None	Both
1712	Liang et al.	2013	China	Dinghushan forest Ecosystem Research Station	Subtropical	forest	18.5	1.8	730	Field	warmed consecutively	None	Both
1713	Liang et al.	2013	China	Dinghushan forest Ecosystem Research Station	Subtropical	forest	20	1.75	730	Field	warmed consecutively	None	Both
1714	Liang et al. (a)	2010	China	Chainbai Mountain-M	Temperate	forest	15	2.59	15	Field	warmed consecutively	Trenching	Both
1715	Liang et al. (a)	2010	China	Chainbai Mountain-S	Temperate	forest	16	2.28	15	Field	warmed consecutively	Trenching	Both
1716	Liang et al. (a)	2010	China	Chainbai Mountain-Y	Temperate	forest	17.5	2.78	15	Field	warmed consecutively	Trenching	Both
1717	Liang et al. (a)	2010	China	Chainbai Mountain-CK	Temperate	forest	19	2.7	15	Field	warmed consecutively	Trenching	Both
1718	Liang et al. (a)	2010	China	Chainbai Mountain-L	Temperate	grassland	16.5	2.2	15	Field	warmed consecutively	Trenching	Both
1719	Liang et al. (b)	2010	Japan	Tomakomai National Forest	Temperate	forest	10	4.39	365	Field	warmed consecutively	None	Both
1720	Liang et al. (b)	2010	Japan	Tomakomai National Forest	Temperate	forest	10	3.13	365	Field	warmed consecutively	None	Both
1721	Lin et al.	2011	China	Haibei Alpine Meadow Ecosystem Research Station	Temperate	grassland	10	1.54	180	Field	warmed consecutively	Vegetation removed	Both
1722	Lin et al.	2011	China	Haibei Alpine Meadow Ecosystem Research Station	Temperate	grassland	10	1.49	180	Field	warmed consecutively	Vegetation removed	Both
1723	Lin et al.	2011	China	Haibei Alpine Meadow Ecosystem Research Station	Temperate	grassland	10	1.43	180	Field	warmed consecutively	Vegetation removed	Both
1724	Lin et al.	2011	China	Haibei Alpine Meadow Ecosystem Research Station	Temperate	grassland	10	1.38	180	Field	warmed consecutively	Vegetation removed	Both
1725	Lindroth et al.	1998	Sweden	NOPEX	Temperate	forest	5	2.6	730	Field	warmed consecutively	None	Both
1726	Litton et al.	2003	USA	Yellowstone-younghigh	Temperate	forest	15	2.1	335	Field	parallel independent samples	None	Both
1727	Litton et al.	2003	USA	Yellowstone-old	Temperate	forest	15	4	365	Field	parallel independent samples	None	Both
1728	Litton et al.	2003	USA	Yellowstone-youngmedium	Temperate	forest	15	2.1	365	Field	parallel independent samples	None	Both
1729	Litton et al.	2003	USA	Yellowstone-younglow	Temperate	forest	15	2.1	365	Field	parallel independent samples	None	Both
1730	Litton et al.	2011	USA	Hawaii Experimental Tropical Forest	Tropical	forest	15	2.31	335	Field	warmed consecutively	None	Both
1731	Litton et al.	2011	USA	Hawaii Experimental Tropical Forest	Tropical	forest	15	2.31	335	Field	warmed consecutively	None	Both
1732	Litton et al.	2011	USA	Hawaii Experimental Tropical Forest	Tropical	forest	15	2.31	335	Field	warmed consecutively	None	Both
1733	Litton et al.	2011	USA	Hakalau Forest National Wildlife Refuge	Tropical	forest	15	2.31	335	Field	warmed consecutively	None	Both
1734	Litton et al.	2011	USA	Hakalau Forest National Wildlife Refuge	Tropical	forest	15	2.31	335	Field	warmed consecutively	None	Both
1735	Litton et al.	2011	USA	Hawaii Experimental Tropical Forest	Tropical	forest	15	2.31	335	Field	warmed consecutively	None	Both
1736	Litton et al.	2011	USA	Hawaii Experimental Tropical Forest	Tropical	forest	15	2.31	335	Field	warmed consecutively	None	Both
1737	Litton et al.	2011	USA	Hawaii Experimental Tropical Forest	Tropical	forest	15	2.31	335	Field	warmed consecutively	None	Both
1738	Litton et al.	2011	USA	Hawaii Experimental Tropical Forest	Tropical	forest	15	2.31	335	Field	warmed consecutively	None	Both
1739	Liu et al.	2006	USA	Oak Ridge	Temperate	forest	15	1.63	270	Field	warmed consecutively	None	Both
1740	Liu et al.	2006	USA	Oak Ridge	Temperate	forest	15.5	2.43	270	Field	warmed consecutively	None	Both
1741	Liu et al.	2006	USA	Oak Ridge	Temperate	forest	19	2.28	270	Field	warmed consecutively	None	Both
1742	Liu et al.	2011	China	Qing-Shan Town	Subtropical	forest	14.5	2.46	365	Field	parallel independent samples	Fertilized	Both
1743	Liu et al.	2011	China	Qing-Shan Town	Subtropical	forest	15	3.24	365	Field	parallel independent samples	Fertilized	Both
1744	Liu et al.	2011	China	Qing-Shan Town	Subtropical	forest	15.5	1.92	365	Field	parallel independent samples	Fertilized	Both
1745	Liu et al.	2013	China	forest Ecosystem Open Research Station of Changbai Mountains	Temperate	forest	10	2.399	120	Field	warmed consecutively	Plants Cutted	Heterotrophic
1746	Liu et al.	2006	USA	Oak Ridge National Environmental Research Park	Temperate	grassland	19	1.9	260	Lab	warmed consecutively	FACE-CO2	Both
1747	Liu et al.	2006	USA	Oak Ridge National Environmental Research Park	Temperate	grassland	19	2.3	260	Lab	warmed consecutively	FACE-CO3	Both
1748	Liu et al.	2006	USA	Oak Ridge National Environmental Research Park	Temperate	grassland	19	2.1	260	Lab	warmed consecutively	FACE-CO4	Both
1749	Liu et al.	2006	USA	Oak Ridge National Environmental Research Park	Temperate	grassland	19	2	260	Lab	warmed consecutively	FACE-CO5	Both
1750	Liu et al.	2006	USA	Oak Ridge National Environmental Research Park	Temperate	grassland	19	2.5	260	Lab	warmed consecutively	FACE-CO6	Both
1751	Liu et al.	2006	USA	Oak Ridge National Environmental Research Park	Temperate	grassland	19	2.1	260	Lab	warmed consecutively	FACE-CO7	Both
1752	Liu et al.	2006	USA	Oak Ridge National Environmental Research Park	Temperate	grassland	19	2.3	260	Lab	warmed consecutively	FACE-CO8	Both
1753	Liu et al.	2006	USA	Oak Ridge National Environmental Research Park	Temperate	grassland	19	2	260	Lab	warmed consecutively	FACE-CO9	Both
1754	Liu et al.	2006	USA	Oak Ridge National Environmental Research Park	Temperate	grassland	19	2.5	260	Lab	warmed consecutively	FACE-CO10	Both
1755	Liu et al.	2006	USA	Oak Ridge National Environmental Research Park	Temperate	grassland	19	2.3	260	Lab	warmed consecutively	FACE-CO11	Both
1756	Liu et al. (a)	2005	China	Changbai Mountain	Temperate	forest	15	2.44	365	Field	warmed consecutively	None	Both
1757	Liu et al. (b)	2005	China	Changbai Mountain	Temperate	forest	15	1.31	365	Field	warmed consecutively	None	Both
1758	Liu et al. (b)	2005	China	Changbai Mountain	Temperate	forest	10	1.71	365	Field	warmed consecutively	None	Both
1759	Lomander et al	1998	Sweden	Ultuna	Temperate	agriculture	12.5	2.88	300	Lab	parallel independent samples	Roots removed/wetting	Both
1760	Londo et al.	1999	USA	Neches River	Subtropical	forest	17.5	2.09	545	Field	warmed consecutively	None	Both
1761	Londo et al.	1999	USA	Neches River	Subtropical	forest	20	2.16	545	Field	warmed consecutively	partial cut	Both
1762	Londo et al.	1999	USA	Neches River	Subtropical	forest	18	2.51	545	Field	warmed consecutively	Cut	Both
1763	Lou et al. (a)	2003	China	Yingtan Ecological Experimental Station	Subtropical	agriculture	10	2.9	365	Field	warmed consecutively	None	Both
1764	Lou et al. (b)	2003	China	Ecological Station of Red Soil	Subtropical	agriculture	10	2.9	365	Field	warmed consecutively	Plants removed	Both
1765	Lovelock et al.	2008	Australia	Giralia-dwarf	Subtropical	forest	21	2.6	730	Field	warmed consecutively	None	Both
1766	Lovelock et al.	2008	New Zealand	Whangapoua-dwarf	Subtropical	forest	21	2.6	730	Field	warmed consecutively	None	Both
1767	Lovelock et al.	2008	Australia	Moreton Bay	Subtropical	forest	21	2.6	730	Field	warmed consecutively	None	Both
1768	Lovelock et al.	2008	New Zealand	Waikopua-dwarf	Subtropical	forest	21	2.6	730	Field	warmed consecutively	None	Both
1769	Lovelock et al.	2008	Australia	Port Douglas	Tropical	forest	21	2.6	730	Field	warmed consecutively	None	Both
1770	Lovelock et al.	2008	Belize	Twin Cays-fringe	Tropical	forest	21	2.6	730	Field	warmed consecutively	None	Both
1771	Lovelock et al.	2008	Belize	Twin Cays-dwarf	Tropical	forest	21	2.6	730	Field	warmed consecutively	None	Both
1772	Lovelock et al.	2008	Panama	Bocas del Toro-dwarf	Tropical	forest	21	2.6	730	Field	warmed consecutively	None	Both
1773	Lovelock et al.	2008	Australia	Hinchinbrook Channel-dwarf	Tropical	forest	21	2.6	730	Field	warmed consecutively	None	Both
1774	Lovelock et al.	2008	Australia	Hinchinbrook Channel-dwarf	Tropical	forest	21	2.6	730	Field	warmed consecutively	None	Both
1775	Luan et al.	2011	China	Baotianman Natural Reserve	Subtropical	forest	10	4.14	365	Field	warmed consecutively	None	Both
1776	Luan et al.	2011	China	Baotianman Natural Reserve	Subtropical	forest	10	3.55	490	Field	warmed consecutively	None	Both
1777	Luan et al.	2011	China	Baotianman Natural Reserve	Subtropical	forest	10	3.5	365	Field	warmed consecutively	None	Both
1778	Luan et al.	2011	China	Baotianman Natural Reserve	Subtropical	forest	10	3.38	490	Field	warmed consecutively	None	Both
1779	Luan et al.	2012	China	Baotianman Natural Reserve	Subtropical	forest	12	4.25	490	Field	warmed consecutively	None	Both
1780	Luan et al.	2012	China	Baotianman Natural Reserve	Subtropical	forest	12	3.8	490	Field	warmed consecutively	None	Both
1781	Luan et al.	2013	China	Baotianman Natural Reserve	Temperate	forest	10	3.8	365	Field	parallel independent samples	None	Both
1782	Luan et al.	2013	China	Baotianman Natural Reserve	Temperate	forest	10	3.8	365	Field	parallel independent samples	None	Both
1783	Luo et al.	2001	USA	Grass Prairie	Subtropical	grassland	20	2.7	365	Field	parallel independent samples	None	Both
1784	Luo et al.	2001	USA	Grass Prairie	Subtropical	grassland	20	2.43	365	Field	parallel independent samples	None	Both
1785	Luo et al.	2001	USA	Grass Prairie	Subtropical	grassland	20	2.25	365	Field	parallel independent samples	None	Both
1786	Luo et al.	2001	USA	Grass Prairie	Subtropical	grassland	20	2.1	365	Field	parallel independent samples	None	Both
1787	Luo et al.	2012	China	Hailuogou Glacier	Subtropical	grassland	6.5	4	365	Field	parallel independent samples	None	Both
1788	Luo et al.	2012	China	Hailuogou Glacier	Subtropical	grassland	6.5	2.3	365	Field	parallel independent samples	None	Both
1789	Luo et al.	2012	China	Hailuogou Glacier	Subtropical	grassland	6.5	2.1	365	Field	parallel independent samples	None	Both
1790	Luo et al.	2012	China	Hailuogou Glacier	Subtropical	grassland	6.5	4.2	365	Field	parallel independent samples	None	Both
1791	Luo et al.	2012	China	Hailuogou Glacier	Subtropical	grassland	6.5	2.6	365	Field	parallel independent samples	None	Both
1792	Ma et al.	2005	USA	Teakettle Experimental Forest	Subtropical	forest	10	1.75	140	Field	warmed consecutively	None	Both
1793	Ma et al.	2014	China	Saihanba	Temperate	forest	10.5	3	180	Field	warmed consecutively	Roots removed	Both
1794	Ma et al.	2014	China	Saihanba	Temperate	forest	10.5	3.03	180	Field	warmed consecutively	Roots removed	Both
1795	Ma et al.	2014	China	Saihanba	Temperate	forest	10.5	4.39	180	Field	warmed consecutively	Roots removed	Both
1796	Ma et al.	2014	China	Saihanba	Temperate	forest	10	2.83	180	Field	warmed consecutively	Roots removed	Both
1797	Ma et al.	2014	China	Saihanba	Temperate	forest	10	2.8	180	Field	warmed consecutively	Roots removed	Both
1798	Ma et al.	2014	China	Saihanba	Temperate	forest	10	4.35	180	Field	warmed consecutively	Roots removed	Both
1799	Ma et al.	2014	China	Saihanba	Temperate	forest	12	2.66	180	Field	warmed consecutively	Roots removed	Both
1800	Ma et al.	2014	China	Saihanba	Temperate	forest	12	2.69	180	Field	warmed consecutively	Roots removed	Both
1801	Ma et al.	2014	China	Saihanba	Temperate	forest	12	3.06	180	Field	warmed consecutively	Roots removed	Both
1802	Maier et al.	2000	USA	SETRES	Subtropical	forest	17.5	2.37	365	Field	warmed consecutively	None	Both
1803	Maier et al.	2000	USA	SETRES	Subtropical	forest	17.5	2.25	365	Field	warmed consecutively	None	Both
1804	Maier et al.	2000	USA	SETRES	Subtropical	forest	17.5	2.4	365	Field	warmed consecutively	None	Both
1805	Maier et al.	2000	USA	SETRES	Subtropical	forest	17.5	2.19	365	Field	warmed consecutively	None	Both
1806	Maljanen et al.	2002	Finland	Maljanen1	Boreal	grassland	10	1.48	38	Field	warmed consecutively	None	Both
1807	Maljanen et al.	2002	Finland	Maljanen1	Boreal	agriculture	10	1.46	38	Field	warmed consecutively	None	Both
1808	Maljanen et al.	2002	Finland	Maljanen1	Boreal	agriculture	10	1.46	38	Field	warmed consecutively	Cut	Both
1809	Maljanen et al.	2002	Finland	Maljanen1	Boreal	agriculture	10	1.38	38	Field	warmed consecutively	Tilled	Both
1810	Maljanen et al.	2002	Finland	Maljanen1	Boreal	forest	10	1.27	38	Field	warmed consecutively	None	Both
1811	Mallik et al.	1997	Canada	Eskwanonwatin Lake-4	Boreal	forest	5	1.99	150	Field	parallel independent samples	None	Both
1812	Mallik et al.	1997	Canada	Eskwanonwatin Lake-2	Boreal	forest	5	1.76	150	Field	parallel independent samples	None	Both
1813	Mallik et al.	1997	Canada	Eskwanonwatin Lake-3	Boreal	forest	5	1.4	150	Field	parallel independent samples	None	Both
1814	Mallik et al.	1997	Canada	Eskwanonwatin Lake-1	Boreal	forest	5	1.12	150	Field	parallel independent samples	None	Both
1815	Mallik et al.	1997	Canada	Eskwanonwatin Lake-4	Boreal	forest	10	1.73	150	Field	parallel independent samples	None	Both
1816	Mallik et al.	1997	Canada	Eskwanonwatin Lake-2	Boreal	forest	10	1.59	150	Field	parallel independent samples	None	Both
1817	Mallik et al.	1997	Canada	Eskwanonwatin Lake-3	Boreal	forest	10	1.34	150	Field	parallel independent samples	None	Both
1818	Mallik et al.	1997	Canada	Eskwanonwatin Lake-1	Boreal	forest	10	1.11	150	Field	parallel independent samples	None	Both
1819	Mallik et al.	1997	Canada	Eskwanonwatin Lake-4	Boreal	forest	15	1.5	150	Field	parallel independent samples	None	Both
1820	Mallik et al.	1997	Canada	Eskwanonwatin Lake-2	Boreal	forest	15	1.43	150	Field	parallel independent samples	None	Both
1821	Mallik et al.	1997	Canada	Eskwanonwatin Lake-3	Boreal	forest	15	1.28	150	Field	parallel independent samples	None	Both
1822	Mallik et al.	1997	Canada	Eskwanonwatin Lake-1	Boreal	forest	15	1.11	150	Field	parallel independent samples	None	Both
1823	Mallik et al.	1997	Canada	Eskwanonwatin Lake-4	Boreal	forest	10	1.66	150	Field	parallel independent samples	None	Both
1824	Mallik et al.	1997	Canada	Eskwanonwatin Lake-2	Boreal	forest	10	1.55	150	Field	parallel independent samples	None	Both
1825	Mallik et al.	1997	Canada	Eskwanonwatin Lake-3	Boreal	forest	10	1.33	150	Field	parallel independent samples	None	Both
1826	Mallik et al.	1997	Canada	Eskwanonwatin Lake-1	Boreal	forest	10	1.11	150	Field	parallel independent samples	None	Both
1827	Mariko et al.	2000	Japan	Mount Norikura	Temperate	forest	5	2.29	210	Field	warmed consecutively	None	Both
1828	Martin et al.	2007	Australia	Wallaby Creek	Temperate	forest	15	1.42	150	Field	warmed consecutively	No Vegetation	Both
1829	Martin et al.	2007	Australia	Wallaby Creek	Temperate	forest	15	1.45	150	Field	warmed consecutively	No Vegetation	Both
1830	Martin et al.	2007	Australia	Wallaby Creek	Temperate	forest	15	1.55	150	Field	warmed consecutively	No Vegetation	Both
1831	Mathes et al.	1985	Germany	Bremen rubble dump	Temperate	agriculture	15	3.88	180	Field	warmed consecutively	None	Both
1832	Mathes et al.	1985	Germany	Bremen rubble dump	Temperate	agriculture	5	3.63	180	Field	warmed consecutively	None	Both
1833	Mathes et al.	1985	Germany	Bremen rubble dump	Temperate	agriculture	10	3.4	180	Field	warmed consecutively	None	Both
1834	Mathes et al.	1985	Germany	Bremen rubble dump	Temperate	agriculture	15	3.17	180	Field	warmed consecutively	None	Both
1835	Mathes et al.	1985	Germany	Bremen rubble dump	Temperate	agriculture	10	4.18	180	Field	warmed consecutively	None	Both
1836	Matias et al.	2012	Spain	Sierra Nevada Natural and National Parks	Subtropical	forest	12.5	1.42	150	Field	parallel independent samples	None	Both
1837	Matias et al.	2012	Spain	Sierra Nevada Natural and National Parks	Subtropical	forest	12.5	1.17	150	Field	parallel independent samples	None	Both
1838	Matias et al.	2012	Spain	Sierra Nevada Natural and National Parks	Subtropical	forest	12.5	1.13	150	Field	parallel independent samples	None	Both
1839	Matias et al.	2012	Spain	Sierra Nevada Natural and National Parks	Subtropical	grassland	12.5	1.07	150	Field	parallel independent samples	None	Both
1840	Matias et al.	2012	Spain	Sierra Nevada Natural and National Parks	Subtropical	grassland	12.5	1.07	150	Field	parallel independent samples	None	Both
1841	Matias et al.	2012	Spain	Sierra Nevada Natural and National Parks	Subtropical	grassland	12.5	1.04	150	Field	parallel independent samples	None	Both
1842	Matias et al.	2012	Spain	Sierra Nevada Natural and National Parks	Subtropical	grassland	17.5	1.35	150	Field	parallel independent samples	None	Both
1843	Matias et al.	2012	Spain	Sierra Nevada Natural and National Parks	Subtropical	grassland	17.5	1.32	150	Field	parallel independent samples	None	Both
1844	Matias et al.	2012	Spain	Sierra Nevada Natural and National Parks	Subtropical	grassland	17.5	1.26	150	Field	parallel independent samples	None	Both
1845	Mayer et al.	2014	Austria	Höllengebirge-HC	Temperate	forest	3	3.08	330	Field	warmed consecutively	Vegetation clipped	Both
1846	Mayer et al.	2014	Austria	Höllengebirge-HW07	Temperate	forest	3	2.49	330	Field	warmed consecutively	Vegetation clipped	Both
1847	Mayer et al.	2014	Austria	Höllengebirge-HW09	Temperate	forest	3	2.33	330	Field	warmed consecutively	Vegetation clipped	Both
1848	Mayer et al.	2014	Austria	Rax-RC	Temperate	forest	5	3.53	330	Field	warmed consecutively	Vegetation clipped	Both
1849	Mayer et al.	2014	Austria	Rax-RW07	Temperate	forest	5	2.44	330	Field	warmed consecutively	Vegetation clipped	Both
1850	Mayer et al.	2014	Austria	Rax-RW00	Temperate	forest	5	2.4	330	Field	warmed consecutively	Vegetation clipped	Both
1851	McCulley et al.	2007	USA	La Copita Research Area	Subtropical	grassland	29	1.43	395	Field	parallel independent samples	Irrigation	Both
1852	McCulley et al.	2007	USA	La Copita Research Area	Subtropical	grassland	29	1.39	395	Field	parallel independent samples	Irrigation	Both
1853	McCulley et al.	2007	USA	La Copita Research Area	Subtropical	grassland	29	1.65	395	Field	parallel independent samples	Irrigation	Both
1854	McCulley et al.	2007	USA	La Copita Research Area	Subtropical	grassland	29	1.75	395	Field	parallel independent samples	Irrigation	Both
1855	McCulley et al.	2007	USA	La Copita Research Area	Subtropical	grassland	29	2.89	395	Field	parallel independent samples	Irrigation	Both
1856	McCulley et al.	2007	USA	La Copita Research Area	Subtropical	grassland	29	2.08	395	Field	parallel independent samples	Irrigation	Both
1857	McCulley et al.	2007	USA	La Copita Research Area	Subtropical	grassland	29	3.27	395	Field	parallel independent samples	Irrigation	Both
1858	McCulley et al.	2007	USA	La Copita Research Area	Subtropical	grassland	29	2.28	395	Field	parallel independent samples	Irrigation	Both
1859	McDowell et al.	2001	USA	Kettle River Range	Subtropical	forest	10	3.39	365	Field	warmed consecutively	None	Both
1860	McHale et al.	1998	USA	Huntington Wildlife Forest	Temperate	forest	15	2.6	330	Field	warmed consecutively	None	Both
1861	McHale et al.	1998	USA	Huntington Wildlife Forest	Temperate	forest	15	2.2	330	Field	warmed consecutively	None	Both
1862	McHale et al.	1998	USA	Huntington Wildlife Forest	Temperate	forest	15	2	330	Field	warmed consecutively	None	Both
1863	McHale et al.	1998	USA	Huntington Wildlife Forest	Temperate	forest	15	1.9	330	Field	warmed consecutively	None	Both
1864	McHale et al.	1998	USA	Huntington Wildlife Forest	Temperate	forest	10	2.6	330	Field	warmed consecutively	None	Both
1865	McHale et al.	1998	USA	Huntington Wildlife Forest	Temperate	forest	10	2.2	330	Field	warmed consecutively	None	Both
1866	McHale et al.	1998	USA	Huntington Wildlife Forest	Temperate	forest	10	2	330	Field	warmed consecutively	None	Both
1867	McHale et al.	1998	USA	Huntington Wildlife Forest	Temperate	forest	10	1.9	330	Field	warmed consecutively	None	Both
1868	Miao et al.	2013	USA	Alligator River National Wildlife Refuge	Temperate	forest	10.5	3.65	510	Field	warmed consecutively	None	Both
1869	Mielnick et al.	2000	USA	Blackland Research Center	Subtropical	grassland	10	2.2	365	Field	parallel independent samples	None	Both
1870	Mielnick et al.	2000	USA	Blackland Research Center	Subtropical	grassland	10	2.2	365	Field	parallel independent samples	None	Both
1871	Mielnick et al.	2000	USA	Blackland Research Center	Subtropical	grassland	10	2.2	365	Field	parallel independent samples	None	Both
1872	Mielnick et al.	2000	USA	Blackland Research Center	Subtropical	grassland	10	2.2	365	Field	parallel independent samples	None	Both
1873	Mielnick et al.	2000	USA	Blackland Research Center	Subtropical	grassland	10	2.2	365	Field	parallel independent samples	None	Both
1874	Mielnick et al.	2000	USA	Blackland Research Center	Subtropical	grassland	10	2.2	365	Field	parallel independent samples	None	Both
1875	Miller et al.	2007	USA	Topaz Lake	Subtropical	grassland	2.5	4.5	126	Lab	parallel independent samples	Wetting	Heterotrophic
1876	Miller et al.	2007	USA	Topaz Lake	Subtropical	grassland	2.5	2.6	126	Lab	parallel independent samples	Wetting	Heterotrophic
1877	Minamikawa et al.	2007	Japan	Agricultural and Forestry Research Center	Subtropical	agriculture	5	3.19	180	Field	parallel independent samples	Fertilized	Both
1878	Minamikawa et al.	2007	Japan	Agricultural and Forestry Research Center	Subtropical	agriculture	5	1.99	180	Field	parallel independent samples	Fertilized	Both
1879	Minamikawa et al.	2007	Japan	Agricultural and Forestry Research Center	Subtropical	agriculture	5	1.46	180	Field	parallel independent samples	Fertilized	Both
1880	Minamikawa et al.	2007	Japan	Agricultural and Forestry Research Center	Subtropical	agriculture	10	3	180	Field	parallel independent samples	Fertilized	Both
1881	Minamikawa et al.	2007	Japan	Agricultural and Forestry Research Center	Subtropical	agriculture	10	2.32	180	Field	parallel independent samples	Fertilized	Both
1882	Minamikawa et al.	2007	Japan	Agricultural and Forestry Research Center	Subtropical	agriculture	10	1.73	180	Field	parallel independent samples	Fertilized	Both
1883	Minamikawa et al.	2007	Japan	Agricultural and Forestry Research Center	Subtropical	agriculture	10	1.39	180	Field	parallel independent samples	Fertilized	Both
1884	Minamikawa et al.	2007	Japan	Agricultural and Forestry Research Center	Subtropical	agriculture	15	1.8	180	Field	parallel independent samples	Fertilized	Both
1885	Minamikawa et al.	2007	Japan	Agricultural and Forestry Research Center	Subtropical	agriculture	15	1.69	180	Field	parallel independent samples	Fertilized	Both
1886	Minamikawa et al.	2007	Japan	Agricultural and Forestry Research Center	Subtropical	agriculture	15	1.5	180	Field	parallel independent samples	Fertilized	Both
1887	Minamikawa et al.	2007	Japan	Agricultural and Forestry Research Center	Subtropical	agriculture	15	1.32	180	Field	parallel independent samples	Fertilized	Both
1888	Minamikawa et al.	2007	Japan	Agricultural and Forestry Research Center	Subtropical	agriculture	10	2.33	180	Field	parallel independent samples	Fertilized	Both
1889	Minamikawa et al.	2007	Japan	Agricultural and Forestry Research Center	Subtropical	agriculture	10	2.04	180	Field	parallel independent samples	Fertilized	Both
1890	Minamikawa et al.	2007	Japan	Agricultural and Forestry Research Center	Subtropical	agriculture	10	1.66	180	Field	parallel independent samples	Fertilized	Both
1891	Minamikawa et al.	2007	Japan	Agricultural and Forestry Research Center	Subtropical	agriculture	10	1.38	180	Field	parallel independent samples	Fertilized	Both
1892	Minkkinen et al.	2007	Finland	Vesijako	Boreal	forest	10	2.85	1095	Field	parallel independent samples	Vegetation removed	Heterotrophic
1893	Minkkinen et al.	2007	Finland	Vesijako	Boreal	forest	10	2.83	1095	Field	parallel independent samples	Vegetation removed	Heterotrophic
1894	Minkkinen et al.	2007	Finland	Vesijako	Boreal	forest	10	2.66	1095	Field	parallel independent samples	Vegetation removed	Heterotrophic
1895	Minkkinen et al.	2007	Estonia	Kivalo	Boreal	forest	10	2.64	1095	Field	parallel independent samples	Vegetation removed	Heterotrophic
1896	Minkkinen et al.	2007	Finland	Vesijako	Boreal	forest	10	3.11	1095	Field	parallel independent samples	Vegetation removed	Heterotrophic
1897	Minkkinen et al.	2007	Finland	Väätsa	Temperate	forest	10	2.09	1095	Field	parallel independent samples	Vegetation removed	Heterotrophic
1898	Misson et al.	2006	USA	Blodgett Forest Research Station	Subtropical	forest	15	1.4	365	Field	parallel independent samples	None	Both
1899	Misson et al.	2010	France	Puechabon State Forest	Subtropical	forest	19	1.9	200	Field	warmed consecutively	None	Both
1900	Misson et al.	2010	France	Puechabon State Forest	Subtropical	forest	19	1.95	200	Field	warmed consecutively	None	Both
1901	Mizoguchi et al.	2003	Japan	Kawagoe City	Subtropical	forest	10	2.5	365	Field	warmed consecutively	None	Both
1902	Mizoguchi et al.	2003	Japan	Kawagoe City	Subtropical	forest	10	2.7	365	Field	warmed consecutively	None	Both
1903	Mizoguchi et al.	2003	Japan	Kawagoe City	Subtropical	forest	10	2.5	365	Field	warmed consecutively	None	Both
1904	Mizoguchi et al.	2003	Japan	Kawagoe City	Subtropical	forest	10	2.7	365	Field	warmed consecutively	None	Both
1905	Mizoguchi et al.	2003	Japan	Kawagoe City	Subtropical	forest	10	2.7	365	Field	warmed consecutively	None	Both
1906	Mizoguchi et al.	2003	Japan	Kawagoe City	Subtropical	forest	10	2.7	365	Field	warmed consecutively	None	Both
1907	Mizoguchi et al.	2003	Japan	Kawagoe City	Subtropical	forest	10	2.8	365	Field	warmed consecutively	None	Both
1908	Mizoguchi et al.	2003	Japan	Kawagoe City	Subtropical	forest	10	2.8	365	Field	warmed consecutively	None	Both
1909	Mizoguchi et al.	2003	Japan	Kawagoe City	Subtropical	forest	10	3.3	365	Field	warmed consecutively	None	Both
1910	Mizoguchi et al.	2003	Japan	Kawagoe City	Subtropical	forest	10	3.3	365	Field	warmed consecutively	None	Both
1911	Mizoguchi et al.	2003	Japan	Kawagoe City	Subtropical	forest	10	4.1	365	Field	warmed consecutively	None	Both
1912	Mizoguchi et al.	2003	Japan	Kawagoe City	Subtropical	forest	10	4.3	365	Field	warmed consecutively	None	Both
1913	Mjöfors et al.	2015	Sweden	Amot	Boreal	forest	10	4.055	1260	Field	warmed consecutively	None	Both
1914	Mjöfors et al.	2015	Sweden	Amot	Boreal	forest	10	3.669	1260	Field	warmed consecutively	Treated	Both
1915	Mjöfors et al.	2015	Sweden	Amot	Boreal	forest	10	3.32	1260	Field	warmed consecutively	Treated	Both
1916	Mjöfors et al.	2015	Sweden	Amot	Boreal	forest	10	3.32	1260	Field	warmed consecutively	Treated	Both
1917	Mjöfors et al.	2015	Sweden	Amot	Boreal	forest	10	3.004	1260	Field	warmed consecutively	Treated	Both
1918	Mo et al.	2005	Japan	Takayama	Temperate	forest	7.5	2.581	1460	Field	parallel independent samples	None	Both
1919	Mo et al.	2005	Japan	Takayama	Temperate	forest	7.5	2.912	1460	Field	parallel independent samples	None	Both
1920	Mo et al.	2005	Japan	Takayama	Temperate	forest	7.5	3.062	1460	Field	parallel independent samples	None	Both
1921	Mo et al.	2005	Japan	Takayama	Temperate	forest	7.5	2.477	1460	Field	parallel independent samples	None	Both
1922	Mo et al.	2005	Japan	Takayama	Temperate	forest	7.5	2.581	1460	Field	parallel independent samples	None	Both
1923	Mo et al.	2005	Japan	Takayama	Temperate	forest	7.5	2.829	1460	Field	parallel independent samples	None	Both
1924	Mo et al.	2005	Japan	Takayama	Temperate	forest	7.5	3.062	1460	Field	parallel independent samples	None	Both
1925	Mo et al.	2005	Japan	Takayama	Temperate	forest	7.5	3.916	1460	Field	parallel independent samples	None	Both
1926	Mo et al.	2005	Japan	Takayama	Temperate	forest	7.5	3.995	1460	Field	parallel independent samples	None	Both
1927	Mo et al.	2005	Japan	Takayama	Temperate	forest	7.5	4.341	1460	Field	parallel independent samples	None	Both
1928	Mo et al.	2005	Japan	Takayama	Temperate	forest	7.5	2.812	1460	Field	parallel independent samples	None	Both
1929	Mo et al.	2005	Japan	Takayama	Temperate	forest	7.5	3.615	1460	Field	parallel independent samples	None	Both
1930	Mo et al.	2005	Japan	Takayama	Temperate	forest	7.5	3.688	1460	Field	parallel independent samples	None	Both
1931	Mo et al.	2005	Japan	Takayama	Temperate	forest	10	3.785	1460	Field	parallel independent samples	None	Both
1932	Mo et al.	2005	Japan	Takayama	Temperate	forest	10	4.276	1460	Field	parallel independent samples	None	Both
1933	Mo et al.	2007	China	Dinghushan Biosphere Reserve-disturb	Subtropical	forest	25	2.3	365	Field	warmed consecutively	Fertilized	Both
1934	Mo et al.	2007	China	Dinghushan Biosphere Reserve-disturb	Subtropical	forest	25	2.2	365	Field	warmed consecutively	Fertilized	Both
1935	Mo et al.	2007	China	Dinghushan Biosphere Reserve-rehab	Subtropical	forest	25	2.1	365	Field	warmed consecutively	Fertilized	Both
1936	Mo et al.	2007	China	Dinghushan Biosphere Reserve-rehab	Subtropical	forest	25	1.9	365	Field	warmed consecutively	Fertilized	Both
1937	Mo et al.	2007	China	Dinghushan Biosphere Reserve-rehab	Subtropical	forest	25	1.8	365	Field	warmed consecutively	Fertilized	Both
1938	Mo et al.	2008	China	Dinghushan Biosphere Reserve	Subtropical	forest	20	2.6	365	Field	warmed consecutively	Fertilized	Both
1939	Mo et al.	2008	China	Dinghushan Biosphere Reserve	Subtropical	forest	20	2.2	365	Field	warmed consecutively	Fertilized	Both
1940	Moren and Lindroth	2000	Sweden	NOPEX	Temperate	forest	10	2.9	180	Field	warmed consecutively	None	Both
1941	Moren and Lindroth	2000	Sweden	NOPEX	Temperate	forest	10	1.9	180	Field	warmed consecutively	None	Both
1942	Moroni et al.	2009	Canada	Pasadena	Boreal	forest	10	3.9	120	Field	warmed consecutively	Vegetatin clipped	Both
1943	Moroni et al.	2009	Canada	Pasadena	Boreal	forest	10	2.75	120	Field	warmed consecutively	Vegetatin clipped	Both
1944	Moyano et al.	2007	Germany	Gebesee	Temperate	agriculture	10	2.34	365	Field	parallel independent samples	harvesting	Both
1945	Moyano et al.	2008	Germany	Wetzstein	Temperate	forest	10	2.5	300	Field	parallel independent samples	None	Both
1946	Moyano et al.	2008	Germany	Hainich	Temperate	forest	10	2.3	300	Field	parallel independent samples	None	Both
1947	Naganawa et al.	1989	Japan	Shimane University Experimental Farm	Subtropical	agriculture	22	2.2	365	Field	parallel independent samples	None	Both
1948	Nakadai et al.	1993	Japan	National Institute for Agro-Environmental Science	Subtropical	agriculture	20.5	2.53	2	Field	warmed consecutively	None	Both
1949	Nakadai et al.	1993	Japan	National Institute for Agro-Environmental Science	Subtropical	agriculture	32.5	1.69	2	Field	warmed consecutively	None	Both
1950	Nakadai et al.	1996	Japan	National Institute for Agro-Environmental Science	Subtropical	agriculture	10	2.58	12	Field	parallel independent samples	None	Both
1951	Nakadai et al.	1996	Japan	National Institute for Agro-Environmental Science	Subtropical	agriculture	22.5	3.53	12	Field	parallel independent samples	None	Both
1952	Nakane	1975	Japan	Nara	Subtropical	forest	14.5	2.59	270	Field	parallel independent samples	None	Both
1953	Nakane	1975	Japan	Nara	Subtropical	forest	14.5	2.8	270	Field	parallel independent samples	None	Both
1954	Nakane	1975	Japan	Nara	Subtropical	forest	14.5	2.89	270	Field	parallel independent samples	None	Both
1955	Nakane	1980	Japan	Mt. Odaigahara	Subtropical	forest	10	3.2	365	Field	parallel independent samples	None	Both
1956	Nakane et al.	1983	Japan	Fuchu	Subtropical	forest	10	2.45	365	Field	parallel independent samples	None	Both
1957	Nakane et al.	1983	Japan	Fuchu	Subtropical	forest	10	1.78	365	Field	parallel independent samples	None	Both
1958	Nakane et al.	1984	Japan	Mt. Takao	Subtropical	forest	10	2.64	365	Field	parallel independent samples	None	Both
1959	Nakane et al.	1984	Japan	Mt. Takao	Subtropical	forest	10	2.05	365	Field	parallel independent samples	None	Both
1960	Nakane et al.	1995	Japan	Amida-cedar	Subtropical	forest	10	2.4	365	Field	parallel independent samples	None	Both
1961	Nakane et al.	1996	Japan	Yoshiwa	Subtropical	forest	10	3.16	365	Field	parallel independent samples	None	Both
1962	Nakane et al.	1997	Canada	BOREAS SSA-OBS	Boreal	forest	15	1.92	365	Field	parallel independent samples	None	Both
1963	Nakane et al.	1997	Canada	BOREAS SSA-OBS	Boreal	forest	15	2.53	365	Field	parallel independent samples	None	Both
1964	Neff and Hooper	2002	USA	Fairbanks	Boreal	forest	20	1.77	360	Lab	parallel independent samples	Roots removed	Both
1965	Neff and Hooper	2002	USA	Fairbanks	Boreal	forest	20	2.23	360	Lab	parallel independent samples	Roots removed	Both
1966	Ngao et al.	2007	France	Hesse Forest-H2	Temperate	forest	10	3.1	390	Field	warmed consecutively	Trenching	Both
1967	Ngao et al.	2007	France	Hesse Forest-H1	Temperate	forest	10	3.1	390	Field	warmed consecutively	Trenching	Both
1968	Ngao et al.	2012	France	Hesse	Temperate	forest	10	2.89	540	Field	warmed consecutively	None	Both
1969	Ngao et al.	2012	France	Hesse	Temperate	forest	10	2.73	540	Field	warmed consecutively	None	Both
1970	Ngao et al.	2012	France	Hesse	Temperate	forest	10	2.54	540	Field	warmed consecutively	None	Both
1971	Ngao et al.	2012	France	Hesse	Temperate	forest	10	2.49	540	Field	warmed consecutively	None	Both
1972	Ngao et al.	2012	France	Hesse	Temperate	forest	10	2.45	540	Field	warmed consecutively	None	Both
1973	Ngao et al.	2012	France	Hesse	Temperate	forest	10	2.4	540	Field	warmed consecutively	None	Both
1974	Ngao et al.	2012	France	Hesse	Temperate	forest	10	2.35	540	Field	warmed consecutively	None	Both
1975	Ni et al.	2012	China	Harbin State Key Agroecological Experimental Station	Temperate	agriculture	15	2.41	150	Field	warmed consecutively	Fertilized	Both
1976	Ni et al.	2012	China	Harbin State Key Agroecological Experimental Station	Temperate	agriculture	15	2.16	150	Field	warmed consecutively	Fertilized	Both
1977	Ni et al.	2012	China	Harbin State Key Agroecological Experimental Station	Temperate	agriculture	15	3.16	150	Field	warmed consecutively	Fertilized	Both
1978	Ni et al.	2012	China	Harbin State Key Agroecological Experimental Station	Temperate	agriculture	15	3.39	150	Field	warmed consecutively	Fertilized	Both
1979	Ni et al.	2012	China	Harbin State Key Agroecological Experimental Station	Temperate	agriculture	15	4.47	150	Field	warmed consecutively	Fertilized	Both
1980	Ni et al.	2012	China	Harbin State Key Agroecological Experimental Station	Temperate	agriculture	15	2.3	150	Field	warmed consecutively	Fertilized	Both
1981	Ni et al.	2012	China	Harbin State Key Agroecological Experimental Station	Temperate	agriculture	15	3.25	150	Field	warmed consecutively	Fertilized	Both
1982	Ni et al.	2012	China	Harbin State Key Agroecological Experimental Station	Temperate	agriculture	15	3.44	150	Field	warmed consecutively	Fertilized	Both
1983	Nianpeng et al.	2013	China	Mongolian Plateau	Temperate	grassland	12.5	2.2	7	Lab	parallel independent samples	Wetting	Both
1984	Nianpeng et al.	2013	China	Mongolian Plateau	Temperate	grassland	12.5	2.4	7	Lab	parallel independent samples	Wetting	Both
1985	Nianpeng et al.	2013	China	Mongolian Plateau	Temperate	grassland	12.5	2.3	1	Lab	parallel independent samples	Wetting	Both
1986	Nianpeng et al.	2013	China	Mongolian Plateau	Temperate	grassland	12.5	2.5	1	Lab	parallel independent samples	Wetting	Both
1987	Nianpeng et al.	2013	China	Mongolian Plateau	Temperate	grassland	12.5	2	1	Lab	parallel independent samples	Wetting	Both
1988	Nianpeng et al.	2013	China	Mongolian Plateau	Temperate	grassland	12.5	2.1	7	Lab	parallel independent samples	Wetting	Both
1989	Nianpeng et al.	2013	China	Mongolian Plateau	Temperate	grassland	12.5	2.2	7	Lab	parallel independent samples	Wetting	Both
1990	Nianpeng et al.	2013	China	Mongolian Plateau	Temperate	grassland	12.5	2.2	1	Lab	parallel independent samples	Wetting	Both
1991	Nianpeng et al.	2013	China	Mongolian Plateau	Temperate	grassland	12.5	1.8	7	Lab	parallel independent samples	Wetting	Both
1992	Nianpeng et al.	2013	China	Mongolian Plateau	Temperate	grassland	12.5	1.9	1	Lab	parallel independent samples	Wetting	Both
1993	Niinisto et al.	2004	Finland	Mekrijärvi Research Station	Boreal	forest	10	3.8	150	Field	warmed consecutively	None	Both
1994	Niinisto et al.	2004	Finland	Mekrijärvi Research Station	Boreal	forest	10	3.2	150	Field	warmed consecutively	None	Both
1995	Niklinska et al.	1999	Sweden	Jädraas	Boreal	forest	12.5	2.38	98	Lab	parallel independent samples	Wetting	Both
1996	Niklinska et al.	1999	Sweden	Harads	Boreal	forest	17.5	1.96	98	Lab	parallel independent samples	Wetting	Both
1997	Niklinska et al.	1999	Sweden	Harads	Boreal	forest	17.5	1.87	98	Lab	parallel independent samples	Wetting	Both
1998	Niklinska et al.	1999	Sweden	Jädraas	Boreal	forest	7.5	3.15	98	Lab	parallel independent samples	Wetting	Both
1999	Niklinska et al.	1999	Sweden	Jädraas	Boreal	forest	7.5	2.98	98	Lab	parallel independent samples	Wetting	Both
[truncated: 1,414 more rows]

## Sheet: Best data approach
ID	Author	Published Year	Country	Site	Latitude	Longitude	WGS 84 N	WGS 84 E	Depth [cm]	Top/Subsoil	Climatezone	Vegetation	Tmin [°C]	Tmax [°C]	Tmean [°C]	Q10	pH	C [%]	N [%]	CN	CEC [cmol kg-1]	Bsat [%]	MAT [°C]	MAP [mm]	Sand [%]	Clay [%]	Silt [%]	P [g m-2]	NDVI	PET [mm]	Humidity [%]	Inkubationtime [d]	Type	Sequential/parallel warming	Pre-Treatment	Mixed vs. Heterotrophic
1	Acosta et al.	2004	Czech Republic	Bily Kriz Experimental Ecological Study Site	49°30'17''N	18°32'28''E	49.5	18.54	5	Top	Temperate	forest	5	15	10	4.09	4.2	1.20342	0.1151	11.003	13.743	80.72	5.5	1250	45.59	23.998	30.412	297.14	0.6251	681	78	20	Field	warmed consecutively	None	Both
2	Acosta et al.	2004	Czech Republic	Bily Kriz Experimental Ecological Study Site	49°30'17''N	18°32'28''E	49.5	18.54	5	Top	Temperate	forest	5	15	10	2.91	4.2	1.20342	0.1151	11.003	13.743	80.72	5.5	1250	45.59	23.998	30.412	297.14	0.6251	681	78	20	Field	warmed consecutively	None	Both
3	Acosta et al.	2004	Czech Republic	Bily Kriz Experimental Ecological Study Site	49°30'17''N	18°32'28''E	49.5	18.54	5	Top	Temperate	forest	5	15	10	3.42	4.2	1.20342	0.1151	11.003	13.743	80.72	5.5	1250	45.59	23.998	30.412	297.14	0.6251	681	78	20	Field	warmed consecutively	None	Both
4	Acosta et al.	2013	Sweden	Norunda			60.0833	17.4667	3	Top	Boreal	forest	0	13	6.5	2.2	4.3714	4.21585	0.25403	12.992	16.777	34.034	5.5	527	48.662	14.892	22.546	426.041	0.6105	559	83	4.5	Field	parallel independent samples	None	Both
5	Acosta et al.	2013	Germany	Wetzstein			50.45	11.45	3	Top	Temperate	forest	1	15	8	2	5.2792	1.74197	0.14574	13.195	12.727	42.946	5.9	840	53.369	19.749	26.882	163.697	0.6288	660	79	4.5	Field	parallel independent samples	None	Both
6	Acosta et al.	2013	Czech Republic	Bily Kriz			49.5	18.5333	3	Top	Temperate	forest	1	14	7.5	2.3	6.4343	1.20342	0.1151	11.003	13.743	80.72	5.5	1200	45.59	23.998	30.412	297.14	0.6251	697	78	4.5	Field	parallel independent samples	None	Both
7	Acosta et al.	2013	Italy	Renon			49.5833	11.4333	3	Top	Temperate	forest	1	14	7.5	2	6.3676	1.38975	0.13033	11.693	16.334	77.399	4.1	1010	48.276	24.568	27.156	272.379	0.6034	742	78	4.5	Field	parallel independent samples	None	Both
8	Aguilos et al.	2013	Japan	Teshio Experimental Forest	44°55'N	142°01'E	44.9167	142.017	5	Top	Temperate	forest	5	25	15	3.18	6.5066	2.35881	0.18881	11.365	17.038	75.242	5.6	806	43.265	25.068	31.667	1135	0.4982	627	79	365	Field	warmed consecutively	Warmed	Both
9	Aguilos et al.	2013	Japan	Teshio Experimental Forest	44°55'N	142°01'E	44.9167	142.017	5	Top	Temperate	forest	5	25	15	3.27	6.5066	2.35881	0.18881	11.365	17.038	75.242	5.8	984	43.265	25.068	31.667	1135	0.4982	627	79	365	Field	warmed consecutively	Warmed	Both
10	Aguilos et al.	2013	Japan	Teshio Experimental Forest	44°55'N	142°01'E	44.9167	142.017	5	Top	Temperate	forest	5	25	15	3.15	6.5066	2.35881	0.18881	11.365	17.038	75.242	5.7	1262	43.265	25.068	31.667	1135	0.4982	627	79	365	Field	warmed consecutively	Warmed	Both
11	Aguilos et al.	2013	Japan	Teshio Experimental Forest	44°55'N	142°01'E	44.9167	142.017	5	Top	Temperate	forest	5	25	15	3.47	6.5066	2.35881	0.18881	11.365	17.038	75.242	6.5	1682	43.265	25.068	31.667	1135	0.4982	627	79	365	Field	warmed consecutively	Warmed	Both
12	Aguilos et al.	2013	Japan	Teshio Experimental Forest	44°55'N	142°01'E	44.9167	142.017	5	Top	Temperate	forest	5	25	15	3.33	6.5066	2.35881	0.18881	11.365	17.038	75.242	5.7	1024	43.265	25.068	31.667	1135	0.4982	627	79	365	Field	warmed consecutively	Warmed	Both
13	Aguilos et al.	2013	Japan	Teshio Experimental Forest	44°55'N	142°01'E	44.9167	142.017	5	Top	Temperate	forest	1	23	12	3.15	6.5066	2.35881	0.18881	11.365	17.038	75.242	5.6	806	43.265	25.068	31.667	1135	0.4982	627	79	365	Field	warmed consecutively	Warmed	Both
14	Aguilos et al.	2013	Japan	Teshio Experimental Forest	44°55'N	142°01'E	44.9167	142.017	5	Top	Temperate	forest	1	23	12	3.06	6.5066	2.35881	0.18881	11.365	17.038	75.242	5.8	984	43.265	25.068	31.667	1135	0.4982	627	79	365	Field	warmed consecutively	Unwarmed	Both
15	Aguilos et al.	2013	Japan	Teshio Experimental Forest	44°55'N	142°01'E	44.9167	142.017	5	Top	Temperate	forest	1	23	12	3	6.5066	2.35881	0.18881	11.365	17.038	75.242	5.7	1262	43.265	25.068	31.667	1135	0.4982	627	79	365	Field	warmed consecutively	Unwarmed	Both
16	Aguilos et al.	2013	Japan	Teshio Experimental Forest	44°55'N	142°01'E	44.9167	142.017	5	Top	Temperate	forest	1	23	12	3.17	6.5066	2.35881	0.18881	11.365	17.038	75.242	6.5	1682	43.265	25.068	31.667	1135	0.4982	627	79	365	Field	warmed consecutively	Unwarmed	Both
17	Aguilos et al.	2013	Japan	Teshio Experimental Forest	44°55'N	142°01'E	44.9167	142.017	5	Top	Temperate	forest	1	23	12	3.16	6.5066	2.35881	0.18881	11.365	17.038	75.242	5.7	1024	43.265	25.068	31.667	1135	0.4982	627	79	365	Field	warmed consecutively	Unwarmed	Both
18	Aguilos et al.	2013	Japan	Teshio Experimental Forest	44°55'N	142°01'E	44.9167	142.017	5	Top	Temperate	forest	1	23	12	2.99	6.5066	2.35881	0.18881	11.365	17.038	75.242	5.6	806	43.265	25.068	31.667	1135	0.4982	627	79	365	Field	warmed consecutively	Unwarmed	Both
19	Aguilos et al.	2013	Japan	Teshio Experimental Forest	44°55'N	142°01'E	44.9167	142.017	5	Top	Temperate	forest	1	23	12	3.04	6.5066	2.35881	0.18881	11.365	17.038	75.242	5.8	984	43.265	25.068	31.667	1135	0.4982	627	79	365	Field	warmed consecutively	Unwarmed	Both
20	Aguilos et al.	2013	Japan	Teshio Experimental Forest	44°55'N	142°01'E	44.9167	142.017	5	Top	Temperate	forest	1	23	12	3	6.5066	2.35881	0.18881	11.365	17.038	75.242	5.7	1262	43.265	25.068	31.667	1135	0.4982	627	79	365	Field	warmed consecutively	Control	Both
21	Aguilos et al.	2013	Japan	Teshio Experimental Forest	44°55'N	142°01'E	44.9167	142.017	5	Top	Temperate	forest	1	23	12	3.25	6.5066	2.35881	0.18881	11.365	17.038	75.242	6.5	1682	43.265	25.068	31.667	1135	0.4982	627	79	365	Field	warmed consecutively	Control	Both
22	Aguilos et al.	2013	Japan	Teshio Experimental Forest	44°55'N	142°01'E	44.9167	142.017	5	Top	Temperate	forest	1	23	12	3.16	6.5066	2.35881	0.18881	11.365	17.038	75.242	5.7	1024	43.265	25.068	31.667	1135	0.4982	627	79	365	Field	warmed consecutively	Control	Both
23	Aguilos et al.	2013	Japan	Teshio Experimental forest			44.9167	142.017	0	Top	Temperate	forest	5	25	15	3.05	6.5066	2.35881	0.18881	11.365	17.038	75.242	5.4	1135	43.265	25.068	31.667	321.889	0.4982	627	79	1170	Field	warmed consecutively	Control	Both
24	Aguilos et al.	2013	Japan	Teshio Experimental forest			44.9167	142.017	0	Top	Temperate	forest	5	25	15	2.95	6.5066	2.35881	0.18881	11.365	17.038	75.242	5.4	1135	43.265	25.068	31.667	321.889	0.4982	627	79	1170	Field	warmed consecutively	Control	Both
25	Almagro et al.	2009	Spain	Cehegin			38.1	-1.8	2	Top	Subtropical	forest	5	30	17.5	1.36	7.583	0.99923	0.1058	10.239	17.331	98.003	15.5	370	40.586	25.906	33.508	1323.81	0.2992	1213	62	365	Field	parallel independent samples	None	Both
26	Almagro et al.	2009	Spain	Cehegin			38.1	-1.8	2	Top	Subtropical	grassland	5	30	17.5	1.35	7.583	0.99923	0.1058	10.239	17.331	98.003	15.5	370	40.586	25.906	33.508	1323.81	0.2992	1213	62	365	Field	parallel independent samples	None	Both
27	Almagro et al.	2009	Spain	Cehegin			38.1	-1.8	2	Top	Subtropical	forest	5	30	17.5	1.12	7.583	0.99923	0.1058	10.239	17.331	98.003	15.5	370	40.586	25.906	33.508	1323.81	0.2992	1213	62	365	Field	parallel independent samples	None	Both
28	Almaraz et al.	2009	Canada	Lods Agronomy Research Centre			45.43	-73.93	10	Top	Temperate	agriculture	10	20	15	4	5.6903	1.45822	0.12377	11.271	15.577	71.7	5.88	982	41.796	23.006	26.898	447.864	0.4991	838	79	214	Field	warmed consecutively	None	Both
29	Anderson	1973	England	London	51°20'N	1°05'E	51.3333	-1.08333	2	Top	Temperate	forest	5	15	10	3.2	4.12	1.17776	0.11296	10.632	13.814	86.135	10.2	723	45.94	25.214	28.846	1323.81	0.6727	701	84	365	Field	warmed consecutively	None	Both
30	Andrews et al.	2000	USA	Piedmont Region (Duke Forest)	35°97'N	79°09'W	36.0201	-78.983	0 to 10	Top	Subtropical	forest	22	40	31	1.73	5.75	0.85067	0.07567	10.919	6.891	56.932	14.69	1156	56.018	23.334	20.648	253.5	0.6725	1273	71	48	Lab	warmed consecutively	Preincubation-Treated	Heterotrophic
31	Andrews et al.	2000	USA	Piedmont Region (Duke Forest)	35°97'N	79°09'W	36.0201	-78.983	0 to 10	Top	Subtropical	forest	4	22	13	3.75	5.75	0.85067	0.07567	10.919	6.891	56.932	14.69	1156	56.018	23.334	20.648	253.5	0.6725	1273	71	48	Lab	warmed consecutively	Preincubation-Treated	Heterotrophic
32	Arevalo et al.	2012	Canada	Linaria	54°12'N	114°8'W	54.2	-114.133	0 to 10	Top	Boreal	agriculture	14	21	17.5	1.92	5.29	6.05212	0.35631	12	25.633	83.509	3	1483	30	41	29	532.377	0.3734	712	77	30	Lab	warmed consecutively	Preincubation-Treated	Heterotrophic
33	Arevalo et al.	2012	Canada	Linaria	54°12'N	114°8'W	54.2	-114.133	0 to 10	Top	Boreal	forest	14	21	17.5	1.52	5.12	6.05212	0.35631	11	25.633	83.509	3	1483	30	43	27	532.377	0.3734	712	77	370	Lab	warmed consecutively	Preincubation-Treated	Heterotrophic
34	Arevalo et al.	2012	Canada	Linaria	54°12'N	114°8'W	54.2	-114.133	0 to 10	Top	Boreal	forest	14	21	17.5	2.48	5.17	6.05212	0.35631	11	25.633	83.509	3	1483	33	41	26	532.377	0.3734	712	77	30	Lab	warmed consecutively	Preincubation-Treated	Heterotrophic
35	Arevalo et al.	2012	Canada	Linaria	54°12'N	114°8'W	54.2	-114.133	0 to 10	Top	Boreal	forest	14	21	17.5	3.02	5.12	6.05212	0.35631	11	25.633	83.509	3	1483	30	43	27	532.377	0.3734	712	77	370	Lab	warmed consecutively	Preincubation-Treated	Heterotrophic
36	Arevalo et al.	2012	Canada	Linaria	54°12'N	114°8'W	54.2	-114.133	0 to 10	Top	Boreal	forest	14	21	17.5	2.69	4.86	6.05212	0.35631	13	25.633	83.509	3	1483	35	34	31	532.377	0.3734	712	77	30	Lab	warmed consecutively	Preincubation-Treated	Heterotrophic
37	Arevalo et al.	2012	Canada	Linaria	54°12'N	114°8'W	54.2	-114.133	0 to 10	Top	Boreal	forest	14	21	17.5	1.83	4.86	6.05212	0.35631	13	25.633	83.509	3	1483	35	34	31	532.377	0.3734	712	77	30	Lab	warmed consecutively	Preincubation-Treated	Heterotrophic
38	Arevalo et al.	2012	Canada	Linaria	54°12'N	114°8'W	54.2	-114.133	0 to 10	Top	Boreal	grassland	14	21	17.5	2.94	5.35	6.05212	0.35631	11	25.633	83.509	3	1483	36	38	26	532.377	0.3734	712	77	370	Lab	warmed consecutively	Preincubation-Treated	Heterotrophic
39	Arevalo et al.	2012	Canada	Linaria	54°12'N	114°8'W	54.2	-114.133	0 to 10	Top	Boreal	grassland	14	21	17.5	1.97	5.35	6.05212	0.35631	11	25.633	83.509	3	1483	36	38	26	532.377	0.3734	712	77	370	Lab	warmed consecutively	Preincubation-Treated	Heterotrophic
40	Arevalo et al.	2012	Canada	Linaria	54°12'N	114°8'W	54.2	-114.133	0 to 10	Top	Boreal	agriculture	14	21	17.5	3.02	5.29	6.05212	0.35631	12	25.633	83.509	3	1483	30	41	29	532.377	0.3734	712	77	370	Lab	warmed consecutively	Preincubation-Treated	Heterotrophic
41	Arevalo et al.	2012	Canada	Linaria	54°12'N	114°8'W	54.2	-114.133	0 to 10	Top	Boreal	forest	14	21	17.5	1.64	5.17	6.05212	0.35631	11	25.633	83.509	3	1483	33	41	26	532.377	0.3734	712	77	370	Lab	warmed consecutively	Preincubation-Treated	Heterotrophic
42	Arevalo et al.	2012	Canada	Linaria	54°12'N	114°8'W	54.2	-114.133	0 to 10	Top	Boreal	forest	7	14	10.5	3.19	5.17	6.05212	0.35631	11	25.633	83.509	3	1483	33	41	26	532.377	0.3734	712	77	30	Lab	warmed consecutively	Preincubation-Treated	Heterotrophic
43	Arevalo et al.	2012	Canada	Linaria	54°12'N	114°8'W	54.2	-114.133	0 to 10	Top	Boreal	forest	7	14	10.5	2.69	4.86	6.05212	0.35631	13	25.633	83.509	3	1483	35	34	31	532.377	0.3734	712	77	30	Lab	warmed consecutively	Preincubation-Treated	Heterotrophic
44	Arevalo et al.	2012	Canada	Linaria	54°12'N	114°8'W	54.2	-114.133	0 to 10	Top	Boreal	forest	7	14	10.5	1.47	4.86	6.05212	0.35631	13	25.633	83.509	3	1483	35	34	31	532.377	0.3734	712	77	30	Lab	warmed consecutively	Preincubation-Treated	Heterotrophic
45	Arevalo et al.	2012	Canada	Linaria	54°12'N	114°8'W	54.2	-114.133	0 to 10	Top	Boreal	grassland	7	14	10.5	2.43	5.35	6.05212	0.35631	11	25.633	83.509	3	1483	36	38	26	532.377	0.3734	712	77	30	Lab	warmed consecutively	Preincubation-Treated	Heterotrophic
46	Arevalo et al.	2012	Canada	Linaria	54°12'N	114°8'W	54.2	-114.133	0 to 10	Top	Boreal	agriculture	7	14	10.5	3.43	5.29	6.05212	0.35631	12	25.633	83.509	3	1483	30	41	29	532.377	0.3734	712	77	370	Lab	warmed consecutively	Preincubation-Treated	Heterotrophic
47	Arevalo et al.	2012	Canada	Linaria	54°12'N	114°8'W	54.2	-114.133	0 to 10	Top	Boreal	forest	7	14	10.5	2.86	5.17	6.05212	0.35631	11	25.633	83.509	3	1483	33	41	26	532.377	0.3734	712	77	30	Lab	warmed consecutively	Preincubation-Treated	Heterotrophic
48	Arevalo et al.	2012	Canada	Linaria	54°12'N	114°8'W	54.2	-114.133	0 to 10	Top	Boreal	grassland	7	14	10.5	4.06	5.35	6.05212	0.35631	11	25.633	83.509	3	1483	36	38	26	532.377	0.3734	712	77	370	Lab	warmed consecutively	Preincubation-Treated	Heterotrophic
49	Arevalo et al.	2012	Canada	Linaria	54°12'N	114°8'W	54.2	-114.133	0 to 10	Top	Boreal	forest	7	14	10.5	2.69	5.12	6.05212	0.35631	11	25.633	83.509	3	1483	30	43	27	532.377	0.3734	712	77	370	Lab	warmed consecutively	Preincubation-Treated	Heterotrophic
50	Arevalo et al.	2012	Canada	Linaria	54°12'N	114°8'W	54.2	-114.133	0 to 10	Top	Boreal	forest	7	14	10.5	3.65	5.12	6.05212	0.35631	11	25.633	83.509	3	1483	30	43	27	532.377	0.3734	712	77	370	Lab	warmed consecutively	Preincubation-Treated	Heterotrophic
51	Arevalo et al.	2012	Canada	Linaria	54°12'N	114°8'W	54.2	-114.133	0 to 10	Top	Boreal	agriculture	7	14	10.5	2.69	5.29	6.05212	0.35631	12	25.633	83.509	3	1483	30	41	29	532.377	0.3734	712	77	370	Lab	warmed consecutively	Preincubation-Treated	Heterotrophic
52	Arneth et al.	1998	New Zealand	Balmoral Forest plantation	42°52'S	172°45'E	-42.87	172.75	6	Top	Temperate	forest	5	25	15	1.9	5.6721	1.18229	0.11497	11.577	11.99	55.758	10.8	547	45.25	23.61	31.14	297.14	0.7221	856	72	8	Field	warmed consecutively	None	Both
53	Asensio et al.	2007	Spain	Prades Mountains	41°13'N	0°55'E	41.22	0.92	3.5	Top	Subtropical	forest	10	20	15	1	7.5375	0.96178	0.10253	10.261	16.765	97.658	12	687	41.748	25.326	32.926	1323.81	0.5218	938	65	27	Field	warmed consecutively	None	Both
54	Atrashi-Andoh et al.	2012	Japan	Appi Forest	40°N	140.56°E	40	140.56	5	Top	Temperate	forest	5	15	10	3.6	6.0595	2.31088	0.19178	11.756	18.213	57.92	6.1	1207	41.937	23.392	34.671	940.01	0.505	722	76	300	Field	warmed consecutively	Litter removed	Both
55	Atrashi-Andoh et al.	2012	Japan	Appi Forest	40°N	140.56°E	40	140.56	5	Top	Temperate	forest	5	15	10	2.3	6.0595	2.31088	0.19178	11.756	18.213	57.92	6.1	1207	41.937	23.392	34.671	940.01	0.505	722	76	300	Field	warmed consecutively	Litter removed	Both
56	Atrashi-Andoh et al.	2012	Japan	Appi Forest	40°N	140.56°E	40	140.56	5	Top	Temperate	forest	5	15	10	4.1	6.0595	2.31088	0.19178	11.756	18.213	57.92	6.1	1207	41.937	23.392	34.671	940.01	0.505	722	76	300	Field	warmed consecutively	Litter removed	Both
57	Atrashi-Andoh et al.	2012	Japan	Appi Forest	40°N	140.56°E	40	140.56	5	Top	Temperate	forest	5	15	10	2.3	6.0595	2.31088	0.19178	11.756	18.213	57.92	6.1	1207	41.937	23.392	34.671	940.01	0.505	722	76	300	Field	warmed consecutively	Litter removed	Both
58	Atrashi-Andoh et al.	2012	Japan	Appi Forest	40°N	140.56°E	40	140.56	5	Top	Temperate	forest	5	15	10	3.9	6.0595	2.31088	0.19178	11.756	18.213	57.92	6.1	1207	41.937	23.392	34.671	940.01	0.505	722	76	300	Field	warmed consecutively	Litter removed	Both
59	Atrashi-Andoh et al.	2012	Japan	Appi Forest	40°N	140.56°E	40	140.56	5	Top	Temperate	forest	5	15	10	3.97	6.0595	2.31088	0.19178	11.756	18.213	57.92	6.1	1207	41.937	23.392	34.671	940.01	0.505	722	76	300	Field	warmed consecutively	Litter removed	Both
60	Azmal et al (a)	1996	Japan	Yamaguchi University Fields			34.1477	131.468	0 to 15	Top	Subtropical	agriculture	15	35	25	2.16	5.6	2.2	0.21	10.5	8.487	47.124	15.32	1824	53	26.5	20.5	195.94	0.498	1087	77	56	Lab	warmed consecutively	None	Both
61	Azmal et al (a)	1996	Japan	Yamaguchi University Fields			34.1477	131.468	0 to 15	Top	Subtropical	agriculture	15	35	25	2.51	5.6	2.2	0.21	10.5	8.487	47.124	15.32	1824	53	26.5	20.5	195.94	0.498	1087	77	56	Lab	warmed consecutively	None	Both
62	Azmal et al (a)	1996	Japan	Yamaguchi University Fields			34.1477	131.468	0 to 15	Top	Subtropical	agriculture	15	35	25	1.96	5.6	2.2	0.21	10.5	8.487	47.124	15.32	1824	53	26.5	20.5	195.94	0.498	1087	77	56	Lab	warmed consecutively	None	Both
63	Azmal et al (b)	1996	Japan	Yamaguchi University Fields			34.1477	131.468	0 to 15	Top	Subtropical	agriculture	25	35	30	1.75	5.6	2.2	0.21	10.5	8.487	47.124	15.32	1824	53	26.5	20.5	195.94	0.498	1087	77	56	Lab	warmed consecutively	None	Both
64	Azmal et al (b)	1996	Japan	Yamaguchi University Fields			34.1477	131.468	0 to 15	Top	Subtropical	agriculture	25	35	30	1.35	5.6	2.2	0.21	10.5	8.487	47.124	15.32	1824	53	26.5	20.5	195.94	0.498	1087	77	11	Lab	warmed consecutively	None	Both
65	Azmal et al (b)	1996	Japan	Yamaguchi University Fields			34.1477	131.468	0 to 15	Top	Subtropical	agriculture	25	35	30	1.89	5.6	2.2	0.21	10.5	8.487	47.124	15.32	1824	53	26.5	20.5	195.94	0.498	1087	77	9	Lab	warmed consecutively	None	Both
66	Bader et al.	2010	Switzerland	SCC FACE			47.47	7.5	10	Top	Temperate	forest	4	17	10.5	3.39	5.8	2.08405	0.18178	10.961	14.261	85.972	8.98	990	48.969	23.286	27.745	297.14	0.652	761	76	245	Field	warmed consecutively	FACE (CO2)	Both
67	Bader et al.	2010	Switzerland	SCC FACE			47.47	7.5	10	Top	Temperate	forest	4	17	10.5	3.97	5.8	2.08405	0.18178	10.961	14.261	85.972	8.98	990	48.969	23.286	27.745	297.14	0.652	761	76	245	Field	warmed consecutively	FACE (CO2)	Both
68	Bader et al.	2010	Switzerland	SCC FACE			47.47	7.5	10	Top	Temperate	forest	4	17	10.5	3.3	5.8	2.08405	0.18178	10.961	14.261	85.972	8.98	990	48.969	23.286	27.745	297.14	0.652	761	76	245	Field	warmed consecutively	FACE (CO2)	Both
69	Bader et al.	2010	Switzerland	SCC FACE			47.47	7.5	10	Top	Temperate	forest	4	17	10.5	3.74	5.8	2.08405	0.18178	10.961	14.261	85.972	8.98	990	48.969	23.286	27.745	297.14	0.652	761	76	245	Field	warmed consecutively	FACE (CO2)	Both
70	Bader et al.	2010	Switzerland	SCC FACE			47.47	7.5	10	Top	Temperate	forest	4	17	10.5	3.47	5.8	2.08405	0.18178	10.961	14.261	85.972	8.98	990	48.969	23.286	27.745	297.14	0.652	761	76	245	Field	warmed consecutively	FACE (CO2)	Both
71	Bader et al.	2010	Switzerland	SCC FACE			47.47	7.5	10	Top	Temperate	forest	4	17	10.5	3.86	5.8	2.08405	0.18178	10.961	14.261	85.972	8.98	990	48.969	23.286	27.745	297.14	0.652	761	76	245	Field	warmed consecutively	FACE (CO2)	Both
72	Bader et al.	2010	Switzerland	SCC FACE			47.47	7.5	10	Top	Temperate	forest	4	17	10.5	3.22	5.8	2.08405	0.18178	10.961	14.261	85.972	8.98	990	48.969	23.286	27.745	297.14	0.652	761	76	245	Field	warmed consecutively	FACE (CO2)	Both
73	Bader et al.	2010	Switzerland	SCC FACE			47.47	7.5	10	Top	Temperate	forest	4	17	10.5	3.65	5.8	2.08405	0.18178	10.961	14.261	85.972	8.98	990	48.969	23.286	27.745	297.14	0.652	761	76	245	Field	warmed consecutively	FACE (CO2)	Both
74	Bahn et al.	2008	Finland	Varriö	67°72'N	29°60'E	67.72	29.6	5	Top	Boreal	grassland	0	10	5	2.71	5.7949	5.66847	0.35891	14.906	21.699	56.212	-1	500	55.861	18.583	25.556	545.812	0.4072	380	85	30	Field	warmed consecutively	None	Both
75	Bahn et al.	2008	Finland	Varriö	67°72'N	29°60'E	67.72	29.6	5	Top	Boreal	grassland	10	20	15	2.31	5.7949	5.66847	0.35891	14.906	21.699	56.212	-1	500	55.861	18.583	25.556	545.812	0.4072	380	85	30	Field	warmed consecutively	None	Both
76	Bahn et al.	2008	Finland	Varriö	67°72'N	29°60'E	67.72	29.6	5	Top	Boreal	grassland	0	20	10	2.5	5.7949	5.66847	0.35891	14.906	21.699	56.212	-1	500	55.861	18.583	25.556	545.812	0.4072	380	85	30	Field	warmed consecutively	None	Both
77	Bahn et al.	2008	Finland	Varriö	67°72'N	29°60'E	67.72	29.6	5	Top	Boreal	grassland	5	15	10	2.54	5.7949	5.66847	0.35891	14.906	21.699	56.212	-1	500	55.861	18.583	25.556	545.812	0.4072	380	85	30	Field	warmed consecutively	None	Both
78	Bahn et al.	2008	Italy	Amplero, Abruzzi	41°54'N	13°36'E	41.9	13.6	5	Top	Subtropical	grassland	10	20	15	1.69	6.4	1.084	0.112	10.7	13.6	93.6	10	1365	48.6	22.6	28.8	272.379	0.6017	891	72	30	Field	warmed consecutively	None	Both
79	Bahn et al.	2008	Italy	Amplero, Abruzzi	41°54'N	13°36'E	41.9	13.6	5	Top	Subtropical	grassland	0	20	10	4.31	6.4	1.084	0.112	10.7	13.6	93.6	10	1365	48.6	22.6	28.8	272.379	0.6017	891	72	30	Field	warmed consecutively	None	Both
80	Bahn et al.	2008	Italy	Amplero, Abruzzi	41°54'N	13°36'E	41.9	13.6	5	Top	Subtropical	grassland	5	15	10	4.06	6.4	1.084	0.112	10.7	13.6	93.6	10	1365	48.6	22.6	28.8	272.379	0.6017	891	72	30	Field	warmed consecutively	None	Both
81	Bahn et al.	2008	Denmark	Berchtesgaden 1	47°37'N	12°35'E	47.62	12.58	5	Top	Temperate	grassland	0	10	5	3.33	5.8	2.0971	0.188	10.756	15.502	93.536	8.3	1665	47.636	23.33	29.034	272.379	0.5559	650	81	30	Field	warmed consecutively	None	Both
82	Bahn et al.	2008	Denmark	Berchtesgaden 3	47°37'N	12°35'E	47.62	12.58	5	Top	Temperate	grassland	0	10	5	3.31	6.6	2.0971	0.188	10.756	15.502	93.536	8.3	1665	47.636	23.33	29.034	272.379	0.5559	650	81	30	Field	warmed consecutively	None	Both
83	Bahn et al.	2008	Denmark	Berchtesgaden 2	47°37'N	12°35'E	47.62	12.58	5	Top	Temperate	grassland	0	20	10	2.35	6.6	2.0971	0.188	10.756	15.502	93.536	8.3	1665	47.636	23.33	29.034	272.379	0.5559	650	81	30	Field	warmed consecutively	None	Both
84	Bahn et al.	2008	Austria	Stubai 1	47°17'N	11°32'E	47.28	11.53	5	Top	Temperate	grassland	10	20	15	2.52	6.8	1.82363	0.15879	12.884	13.174	53.11	6.3	850	52.679	19.353	27.968	394.198	0.4811	876	83	30	Field	warmed consecutively	None	Both
85	Bahn et al.	2008	Denmark	Berchtesgaden 3	47°37'N	12°35'E	47.62	12.58	5	Top	Temperate	grassland	5	15	10	2.69	6.6	2.0971	0.188	10.756	15.502	93.536	8.3	1665	47.636	23.33	29.034	272.379	0.5559	650	81	30	Field	warmed consecutively	None	Both
86	Bahn et al.	2008	Denmark	Berchtesgaden 2	47°37'N	12°35'E	47.62	12.58	5	Top	Temperate	grassland	0	10	5	2.74	6.6	2.0971	0.188	10.756	15.502	93.536	8.3	1665	47.636	23.33	29.034	272.379	0.5559	650	81	30	Field	warmed consecutively	None	Both
87	Bahn et al.	2008	Austria	Stubai 3	47°17'N	11°32'E	47.28	11.53	5	Top	Temperate	grassland	0	10	5	4.01	6.8	1.82363	0.15879	12.884	13.174	53.11	3	1097	52.679	19.353	27.968	394.198	0.4811	876	83	30	Field	warmed consecutively	None	Both
88	Bahn et al.	2008	Austria	Stubai 3	47°17'N	11°32'E	47.28	11.53	5	Top	Temperate	grassland	10	20	15	1.99	6.8	1.82363	0.15879	12.884	13.174	53.11	3	1097	52.679	19.353	27.968	394.198	0.4811	876	83	30	Field	warmed consecutively	None	Both
89	Bahn et al.	2008	Denmark	Berchtesgaden 1	47°37'N	12°35'E	47.62	12.58	5	Top	Temperate	grassland	0	20	10	2.78	5.8	2.0971	0.188	10.756	15.502	93.536	8.3	1665	47.636	23.33	29.034	272.379	0.5559	650	81	30	Field	warmed consecutively	None	Both
90	Bahn et al.	2008	Denmark	Berchtesgaden 3	47°37'N	12°35'E	47.62	12.58	5	Top	Temperate	grassland	0	20	10	2.76	6.6	2.0971	0.188	10.756	15.502	93.536	8.3	1665	47.636	23.33	29.034	272.379	0.5559	650	81	30	Field	warmed consecutively	None	Both
91	Bahn et al.	2008	Austria	Stubai 3	47°17'N	11°32'E	47.28	11.53	5	Top	Temperate	grassland	0	20	10	2.83	6.8	1.82363	0.15879	12.884	13.174	53.11	3	1097	52.679	19.353	27.968	394.198	0.4811	876	83	30	Field	warmed consecutively	None	Both
92	Bahn et al.	2008	Denmark	Berchtesgaden 3	47°37'N	12°35'E	47.62	12.58	5	Top	Temperate	grassland	10	20	15	2.3	6.6	2.0971	0.188	10.756	15.502	93.536	8.3	1665	47.636	23.33	29.034	272.379	0.5559	650	81	30	Field	warmed consecutively	None	Both
93	Bahn et al.	2008	Denmark	Berchtesgaden 2	47°37'N	12°35'E	47.62	12.58	5	Top	Temperate	grassland	10	20	15	2.02	6.6	2.0971	0.188	10.756	15.502	93.536	8.3	1665	47.636	23.33	29.034	272.379	0.5559	650	81	30	Field	warmed consecutively	None	Both
94	Bahn et al.	2008	Denmark	Berchtesgaden 1	47°37'N	12°35'E	47.62	12.58	5	Top	Temperate	grassland	10	20	15	2.31	5.8	2.0971	0.188	10.756	15.502	93.536	8.3	1665	47.636	23.33	29.034	272.379	0.5559	650	81	30	Field	warmed consecutively	None	Both
95	Bahn et al.	2008	Denmark	Berchtesgaden 1	47°37'N	12°35'E	47.62	12.58	5	Top	Temperate	grassland	5	15	10	2.71	5.8	2.0971	0.188	10.756	15.502	93.536	8.3	1665	47.636	23.33	29.034	272.379	0.5559	650	81	30	Field	warmed consecutively	None	Both
96	Bahn et al.	2008	Denmark	Berchtesgaden 2	47°37'N	12°35'E	47.62	12.58	5	Top	Temperate	grassland	5	15	10	2.31	6.6	2.0971	0.188	10.756	15.502	93.536	8.3	1665	47.636	23.33	29.034	272.379	0.5559	650	81	30	Field	warmed consecutively	None	Both
97	Bahn et al.	2008	Austria	Stubai 3	47°17'N	11°32'E	47.28	11.53	5	Top	Temperate	grassland	5	15	10	2.9	6.8	1.82363	0.15879	12.884	13.174	53.11	3	1097	52.679	19.353	27.968	394.198	0.4811	876	83	30	Field	warmed consecutively	None	Both
98	Bahn et al.	2008	Switzerland	Oensingen extensive	47°17'N	7°44'E	47.28	7.73	5	Top	Temperate	grassland	0	10	5	4.39	7.5	2.08405	0.18178	10.961	14.261	85.972	9	1200	48.969	23.286	27.745	297.14	0.6255	781	76	30	Field	warmed consecutively	None	Both
99	Bahn et al.	2008	Switzerland	Oensingen extensive	47°17'N	7°44'E	47.28	7.73	5	Top	Temperate	grassland	10	20	15	2.63	7.5	2.08405	0.18178	10.961	14.261	85.972	9	1200	48.969	23.286	27.745	297.14	0.6255	781	76	30	Field	warmed consecutively	None	Both
100	Bahn et al.	2008	Switzerland	Oensingen extensive	47°17'N	7°44'E	47.28	7.73	5	Top	Temperate	grassland	0	20	10	3.4	7.5	2.08405	0.18178	10.961	14.261	85.972	9	1200	48.969	23.286	27.745	297.14	0.6255	781	76	30	Field	warmed consecutively	None	Both
101	Bahn et al.	2008	United Kingdom	Cow Park	55°52'N	3°12'W	55.52	-3.2	5	Top	Temperate	grassland	10	20	15	1.12	6.4	0.90226	0.07996	9.385	10.05	57.32	8.3	849	37.101	21.157	25.042	363.889	0.6523	558	84	30	Field	warmed consecutively	None	Both
102	Bahn et al.	2008	United Kingdom	Auchencorth Moss	55°79'N	3°12'W	55.79	-3.4	5	Top	Temperate	grassland	10	20	15	4.32	4.9648	0.90226	0.07996	9.385	10.05	57.32	8	970	37.101	21.157	25.042	363.889	0.6342	568	84	30	Field	warmed consecutively	None	Both
103	Bahn et al.	2008	Switzerland	Oensingen extensive	47°17'N	7°44'E	47.28	7.73	5	Top	Temperate	grassland	5	15	10	3.57	7.5	2.08405	0.18178	10.961	14.261	85.972	9	1200	48.969	23.286	27.745	297.14	0.6255	781	76	30	Field	warmed consecutively	None	Both
104	Ball et al.	2007	United Kingdom	Harwood Forest	55°10'N	2°3'W	55.17	-2.05	5	Top	Temperate	forest	10	20	15	1.08	3.6	52.1	2.0725	25.5	30.138	43.682	7.5	950	40.889	26.78	32.331	450.166	0.6461	581	86	44	Field	parallel independent samples	None	Both
105	Ball et al.	2007	United Kingdom	Harwood Forest	55°10'N	2°3'W	55.17	-2.05	5	Top	Temperate	grassland	10	20	15	1.18	3.9	39.775	1.5	27.9	30.138	43.682	7.5	950	40.889	26.78	32.331	450.166	0.6461	581	86	44	Field	parallel independent samples	None	Both
106	Ball et al.	2007	United Kingdom	Harwood Forest	55°10'N	2°3'W	55.17	-2.05	5	Top	Temperate	forest	10	20	15	1.07	3.8	27.2025	0.93675	25.9	30.138	43.682	7.5	950	40.889	26.78	32.331	450.166	0.6461	581	86	44	Field	parallel independent samples	None	Both
107	Ball et al.	2007	United Kingdom	Harwood Forest	55°10'N	2°3'W	55.17	-2.05	5	Top	Temperate	forest	10	20	15	1.13	4.2	23.695	1.0065	23.6	30.138	43.682	7.5	950	40.889	26.78	32.331	450.166	0.6461	581	86	44	Field	parallel independent samples	None	Both
108	Ball et al.	2007	United Kingdom	Harwood Forest	55°10'N	2°3'W	55.17	-2.05	5	Top	Temperate	forest	5	15	10	1.12	3.6	52.1	2.0725	25.5	30.138	43.682	7.5	950	40.889	26.78	32.331	450.166	0.6461	581	86	44	Field	parallel independent samples	None	Both
109	Ball et al.	2007	United Kingdom	Harwood Forest	55°10'N	2°3'W	55.17	-2.05	5	Top	Temperate	grassland	5	15	10	1.29	3.9	39.775	1.5	27.9	30.138	43.682	7.5	950	40.889	26.78	32.331	450.166	0.6461	581	86	44	Field	parallel independent samples	None	Both
110	Ball et al.	2007	United Kingdom	Harwood Forest	55°10'N	2°3'W	55.17	-2.05	5	Top	Temperate	forest	5	15	10	1.11	3.8	27.2025	0.93675	25.9	30.138	43.682	7.5	950	40.889	26.78	32.331	450.166	0.6461	581	86	44	Field	parallel independent samples	None	Both
111	Ball et al.	2007	United Kingdom	Harwood Forest	55°10'N	2°3'W	55.17	-2.05	5	Top	Temperate	forest	5	15	10	1.22	4.2	23.695	1.0065	23.6	30.138	43.682	7.5	950	40.889	26.78	32.331	450.166	0.6461	581	86	44	Field	parallel independent samples	None	Both
112	Balogh et al.	2008	Hungary	Bugacpuszta			46.69	19.6		Top	Temperate	grassland	0	20	10	3.42	7.1931	1.48339	0.13404	10.733	18.079	88.396	10.4	562	41.465	26.417	32.118	199.855	0.5324	917	76	365	Field	warmed consecutively	None	Both
113	Baronti et al.	2008	Italy	Poggio S. Cecilia	47°17'N	11°36'E	43.28	11.6	10	Top	Subtropical	grassland	0	20	10	1.82	8	0.9739	0.09803	11.103	12.815	80.15	13.8	781	49.167	22.276	28.557	576.718	0.5693	997	73	17	Field	warmed consecutively	FACE (CO2)	Both
114	Baronti et al.	2008	Italy	Poggio S. Cecilia	47°17'N	11°36'E	43.28	11.6	10	Top	Subtropical	grassland	0	20	10	1.73	8	0.9739	0.09803	11.103	12.815	80.15	13.8	781	49.167	22.276	28.557	576.718	0.5693	997	73	17	Field	warmed consecutively	FACE (CO2)	Both
115	Basu et al.	1991	India	Sambalpur University			21.5	83.5	0	Top	Tropical	forest	20	30	25	1.17	7.6489	0.78047	0.07967	11.022	38.288	97.196	26.95	1345	21.555	49.857	28.588	503.847	0.4691	1760	65	465	Field	warmed consecutively	None	Both
116	Beier et al.	2008	Spain	Garraf	41°18'N	1°49'E	41.3	1.82	2	Top	Subtropical	grassland	10	37	23.5	1.4	4.6891	0.66644	0.06616	6.628	10.896	60.185	15.6	456	25.264	17.361	21.375	394.197	0.5717	897	70	365	Field	warmed consecutively	Constant water	Both
117	Beier et al.	2008	Spain	Garraf	41°18'N	1°49'E	41.3	1.82	2	Top	Subtropical	grassland	10	37	23.5	1.4	4.6891	0.66644	0.06616	6.628	10.896	60.185	15.6	456	25.264	17.361	21.375	394.197	0.5717	897	70	365	Field	warmed consecutively	Constant water	Both
118	Bekku et al.	2003	Japan	Tsukuba	36°N	140°E	36	140	0 to 10	Top	Subtropical	grassland	12	28	20	2	5.5047	7.5	0.55	10.682	20.222	55.623	13.9	1224	43.595	20.023	27.882	485.166	0.4239	1033	70	24	Lab	parallel independent samples	Constant water	Heterotrophic
119	Bekku et al.	2003	Japan	Tsukuba	36°N	140°E	36	140	0 to 10	Top	Subtropical	grassland	2	20	11	2.8	5.5047	7.5	0.55	10.682	20.222	55.623	13.9	1224	43.595	20.023	27.882	485.166	0.4239	1033	70	24	Lab	parallel independent samples	Constant water	Heterotrophic
120	Bekku et al.	2003	Japan	Tsukuba	36°N	140°E	36	140	0 to 10	Top	Subtropical	grassland	2	20	11	2.9	5.5047	7.5	0.55	10.682	20.222	55.623	13.9	1224	43.595	20.023	27.882	485.166	0.4239	1033	70	7	Lab	parallel independent samples	Constant water	Heterotrophic
121	Bekku et al.	2003	Japan	Tsukuba	36°N	140°E	36	140	0 to 10	Top	Subtropical	grassland	2	24	13	2.5	5.5047	7.5	0.55	10.682	20.222	55.623	13.9	1224	43.595	20.023	27.882	485.166	0.4239	1033	70	24	Lab	parallel independent samples	Constant water	Heterotrophic
122	Bekku et al.	2003	Malaysia	Pasoh	2°N	102°E	2.5	102	0 to 10	Top	Tropical	forest	16	32	24	2.1	3.32317	2.5	0.2	6.504	6.699	35.397	27.1	1746	26.519	16.734	14.047	207	0.7667	1616	84	24	Lab	parallel independent samples	Constant water	Heterotrophic
123	Bekku et al.	2003	Malaysia	Pasoh	2°N	102°E	2.5	102	0 to 10	Top	Tropical	forest	16	32	24	2.1	3.32317	2.5	0.2	6.504	6.699	35.397	27.1	1746	26.519	16.734	14.047	207	0.7667	1616	84	7	Lab	parallel independent samples	Constant water	Heterotrophic
124	Bekku et al.	2003	Malaysia	Pasoh	2°N	102°E	2.5	102	0 to 10	Top	Tropical	forest	24	40	32	2.1	3.32317	2.5	0.2	6.504	6.699	35.397	27.1	1746	26.519	16.734	14.047	207	0.7667	1616	84	24	Lab	parallel independent samples	Constant water	Heterotrophic
125	Bekku et al.	2003	Malaysia	Pasoh	2°N	102°E	2.5	102	0 to 10	Top	Tropical	forest	5	24	14.5	2.7	3.32317	2.5	0.2	6.504	6.699	35.397	27.1	1746	26.519	16.734	14.047	207	0.7667	1616	84	24	Lab	parallel independent samples	Constant water	Heterotrophic
126	Bergeron et al.	2009	Canada	EOBS	49.692°N	74.342°W	49.69	-74.34	5	Top	Boreal	forest	5	15	10	3.22	3.8972	6.41994	0.3541	13.75	20.354	26.924	0	961.3	49.592	12.018	18.99	426.041	0.4155	624	84	180	Field	warmed consecutively	None	Both
127	Bergeron et al.	2009	Canada	EOBS	49.692°N	74.342°W	49.69	-74.34	5	Top	Boreal	forest	5	15	10	4.42	3.8972	6.41994	0.3541	13.75	20.354	26.924	0	961.3	49.592	12.018	18.99	426.041	0.4155	624	84	180	Field	warmed consecutively	None	Both
128	Bergeron et al.	2009	Canada	EOBS	49.692°N	74.342°W	49.69	-74.34	5	Top	Boreal	forest	5	15	10	4.04	3.8972	6.41994	0.3541	13.75	20.354	26.924	0	961.3	49.592	12.018	18.99	426.041	0.4155	624	84	180	Field	warmed consecutively	None	Both
129	Bergeron et al.	2009	Canada	EOBS	49.692°N	74.342°W	49.69	-74.34	5	Top	Boreal	forest	5	15	10	4.36	3.8972	6.41994	0.3541	13.75	20.354	26.924	0	961.3	49.592	12.018	18.99	426.041	0.4155	624	84	180	Field	warmed consecutively	None	Both
130	Bergeron et al.	2009	Canada	EOBS	49.692°N	74.342°W	49.69	-74.34	5	Top	Boreal	forest	5	15	10	3.54	3.8972	6.41994	0.3541	13.75	20.354	26.924	0	961.3	49.592	12.018	18.99	426.041	0.4155	624	84	180	Field	warmed consecutively	None	Both
131	Bergeron et al.	2009	Canada	EOBS	49.692°N	74.342°W	49.69	-74.34	5	Top	Boreal	forest	5	15	10	3.41	3.8972	6.41994	0.3541	13.75	20.354	26.924	0	961.3	49.592	12.018	18.99	426.041	0.4155	624	84	180	Field	warmed consecutively	None	Both
132	Bergeron et al.	2009	Canada	EOBS	49.692°N	74.342°W	49.69	-74.34	5	Top	Boreal	forest	5	15	10	4.29	3.8972	6.41994	0.3541	13.75	20.354	26.924	0	961.3	49.592	12.018	18.99	426.041	0.4155	624	84	180	Field	warmed consecutively	None	Both
133	Bergeron et al.	2009	Canada	EOBS	49.692°N	74.342°W	49.69	-74.34	5	Top	Boreal	forest	5	15	10	4.25	3.8972	6.41994	0.3541	13.75	20.354	26.924	0	961.3	49.592	12.018	18.99	426.041	0.4155	624	84	180	Field	warmed consecutively	None	Both
134	Bergeron et al.	2009	Canada	EOBS	49.692°N	74.342°W	49.69	-74.34	5	Top	Boreal	forest	5	15	10	3.33	3.8972	6.41994	0.3541	13.75	20.354	26.924	0	961.3	49.592	12.018	18.99	426.041	0.4155	624	84	180	Field	warmed consecutively	None	Both
135	Billes et al.	1971	France	Madeleine			48.36	1.65		Top	Temperate	forest	10	20	15	2.73	6.4006	1.00474	0.10326	10.906	11.254	88.549	14.4	770	52.685	20.938	26.377	297.14	0.478	817	82	365	Field	warmed consecutively	None	Both
136	Billes et al.	1971	France	Madeleine			48.36	1.65		Top	Temperate	forest	10	20	15	2.73	6.4006	1.00474	0.10326	10.906	11.254	88.549	14.4	770	52.685	20.938	26.377	297.14	0.478	817	82	365	Field	warmed consecutively	None	Both
137	Billes et al.	1971	France	Madeleine			48.36	1.65		Top	Temperate	forest	10	20	15	2.73	6.4006	1.00474	0.10326	10.906	11.254	88.549	14.4	770	52.685	20.938	26.377	297.14	0.478	817	82	365	Field	warmed consecutively	None	Both
138	Billes et al.	1971	France	Rouquet			48.56	1.61		Top	Temperate	forest	10	20	15	2.33	5.9126	2.15092	0.18504	12.187	13.876	74.421	14.4	770	53.109	19.574	27.317	297.14	0.5877	810	81	365	Field	warmed consecutively	None	Both
139	Billes et al.	1971	France	Rouquet			48.56	1.61		Top	Temperate	forest	10	20	15	2.33	5.9126	2.15092	0.18504	12.187	13.876	74.421	14.4	770	53.109	19.574	27.317	297.14	0.5877	810	81	365	Field	warmed consecutively	None	Both
140	Billes et al.	1971	France	Rouquet			48.56	1.61		Top	Temperate	forest	10	20	15	2.33	5.9126	2.15092	0.18504	12.187	13.876	74.421	14.4	770	53.109	19.574	27.317	297.14	0.5877	810	81	365	Field	warmed consecutively	None	Both
141	Blanke	1996	Germany	Bonn	39o50' N	8o05' E	50.7374	7.09821	0	Top	Temperate	forest	0	10	5	2.3	5.5292	1.5794	0.12781	12.381	11.59	55.719	10.62	715	51.449	21.431	27.12	532.377	0.4892	771	77	4	Field	warmed consecutively	glufosinate ammonium	Both
142	Blanke	1996	Germany	Bonn	39o50' N	8o05' E	50.7374	7.09821	0	Top	Temperate	forest	-10	0	-5	4	5.5292	1.5794	0.12781	12.381	11.59	55.719	10.62	715	51.449	21.431	27.12	532.377	0.4892	771	77	4	Field	warmed consecutively	glufosinate ammonium	Both
143	Blanke	1996	Germany	Bonn	39o50' N	8o05' E	50.7374	7.09821	0	Top	Temperate	forest	10	20	15	1.65	5.5292	1.5794	0.12781	12.381	11.59	55.719	10.62	715	51.449	21.431	27.12	532.377	0.4892	771	77	4	Field	warmed consecutively	glufosinate ammonium	Both
144	Blanke	1996	Germany	Bonn	39o50' N	8o05' E	50.7374	7.09821	0	Top	Temperate	forest	20	22	21	1.3	5.5292	1.5794	0.12781	12.381	11.59	55.719	10.62	715	51.449	21.431	27.12	532.377	0.4892	771	77	4	Field	warmed consecutively	glufosinate ammonium	Both
145	Blet-Cahraudeau et al	1990	France	Champagne Crayeuse Region			48.9169	4.15143	0 to 10	Top	Temperate	grassland	19	28	23.5	1.4	7.8	7.4	0.5	15.6	15.5	94.5	10.27	610	44.8	24.1	31.1	1323.81	0.5352	835	82	50	Lab	parallel independent samples	Ba(OH)2	Heterotrophic
146	Blet-Cahraudeau et al	1990	France	Champagne Crayeuse Region			48.9169	4.15143	0 to 10	Top	Temperate	agriculture	19	28	23.5	1.8	8.2	1.8	0.2	9.2	15.5	94.5	10.27	610	44.8	24.1	31.1	1323.81	0.5352	835	82	50	Lab	parallel independent samples	Ba(OH)2	Heterotrophic
147	Bolstad et al.	2004	USA	Chequamegon-NH1	45°48'N	90°07'W	45.8	-90.12	10	Top	Temperate	forest	0	20	10	2.35	5.2737	3.89223	0.24172	13.839	17.082	51.542	4.1	800	52.91	20.079	27.011	426.041	0.4695	822	77	3	Field	warmed consecutively	None	Both
148	Bolstad et al.	2004	USA	Chequamegon-NH2	45°48'N	90°07'W	45.8	-90.12	10	Top	Temperate	forest	0	20	10	2.32	5.2737	3.89223	0.24172	13.839	17.082	51.542	4.1	800	52.91	20.079	27.011	426.041	0.4695	822	77	3	Field	warmed consecutively	None	Both
149	Bolstad et al.	2004	USA	Chequamegon-NH3	45°48'N	90°07'W	45.8	-90.12	10	Top	Temperate	forest	0	20	10	2.25	5.2737	3.89223	0.24172	13.839	17.082	51.542	4.1	800	52.91	20.079	27.011	426.041	0.4695	822	77	3	Field	warmed consecutively	None	Both
150	Bolstad et al.	2004	USA	Chequamegon-IA1	45°48'N	90°07'W	45.8	-90.12	10	Top	Temperate	forest	0	20	10	2.23	5.2737	3.89223	0.24172	13.839	17.082	51.542	4.1	800	52.91	20.079	27.011	426.041	0.4695	822	77	3	Field	warmed consecutively	None	Both
151	Bolstad et al.	2004	USA	Chequamegon-NH4	45°48'N	90°07'W	45.8	-90.12	10	Top	Temperate	forest	0	20	10	2.17	5.2737	3.89223	0.24172	13.839	17.082	51.542	4.1	800	52.91	20.079	27.011	426.041	0.4695	822	77	3	Field	warmed consecutively	None	Both
152	Bolstad et al.	2004	USA	Chequamegon-IA2	45°48'N	90°07'W	45.8	-90.12	10	Top	Temperate	forest	0	20	10	2.11	5.2737	3.89223	0.24172	13.839	17.082	51.542	4.1	800	52.91	20.079	27.011	426.041	0.4695	822	77	3	Field	warmed consecutively	None	Both
153	Bolstad et al.	2004	USA	Chequamegon-MA2	45°48'N	90°07'W	45.8	-90.12	10	Top	Temperate	forest	0	20	10	2.08	5.2737	3.89223	0.24172	13.839	17.082	51.542	4.1	800	52.91	20.079	27.011	426.041	0.4695	822	77	3	Field	warmed consecutively	None	Both
154	Bolstad et al.	2004	USA	Chequamegon-MA1	45°48'N	90°07'W	45.8	-90.12	10	Top	Temperate	forest	0	20	10	1.94	5.2737	3.89223	0.24172	13.839	17.082	51.542	4.1	800	52.91	20.079	27.011	426.041	0.4695	822	77	3	Field	warmed consecutively	None	Both
155	Bolstad et al.	2005	USA	Coweeta	35°5'N	83°30'W	35.08	-85.5	20	Top	Temperate	forest	0	20	10	4.39	4.99787	1.01142	0.0928	10.409	8.416	47.627	12.9	1796	46.795	21.509	23.396	297.14	0.6719	1287	72	365	Field	parallel independent samples	None	Both
156	Bolstad et al.	2005	USA	Coweeta	35°5'N	83°30'W	35.08	-85.5	20	Top	Temperate	forest	0	20	10	3.1	4.99787	1.01142	0.0928	10.409	8.416	47.627	12.9	1796	46.795	21.509	23.396	297.14	0.6719	1287	72	365	Field	parallel independent samples	None	Both
157	Bolstad et al.	2005	USA	Coweeta	35°5'N	83°30'W	35.08	-85.5	20	Top	Temperate	forest	0	20	10	2.86	4.99787	1.01142	0.0928	10.409	8.416	47.627	12.9	1796	46.795	21.509	23.396	297.14	0.6719	1287	72	365	Field	parallel independent samples	None	Both
158	Bolstad et al.	2005	USA	Coweeta	35°5'N	83°30'W	35.08	-85.5	20	Top	Temperate	grassland	0	20	10	2.69	4.99787	1.01142	0.0928	10.409	8.416	47.627	12.9	1796	46.795	21.509	23.396	297.14	0.6719	1287	72	365	Field	parallel independent samples	None	Both
159	Bolstad et al.	2005	USA	Coweeta	35°5'N	83°30'W	35.08	-85.5	20	Top	Temperate	grassland	0	20	10	2.64	4.99787	1.01142	0.0928	10.409	8.416	47.627	12.9	1796	46.795	21.509	23.396	297.14	0.6719	1287	72	365	Field	parallel independent samples	None	Both
160	Bolstad et al.	2005	USA	Coweeta	35°5'N	83°30'W	35.08	-85.5	20	Top	Temperate	grassland	0	20	10	2.1	4.99787	1.01142	0.0928	10.409	8.416	47.627	12.9	1796	46.795	21.509	23.396	297.14	0.6719	1287	72	365	Field	parallel independent samples	None	Both
161	Bolstad et al.	2005	USA	Coweeta	35°5'N	83°30'W	35.08	-85.5	20	Top	Temperate	grassland	0	20	10	1.8	4.99787	1.01142	0.0928	10.409	8.416	47.627	12.9	1796	46.795	21.509	23.396	297.14	0.6719	1287	72	365	Field	parallel independent samples	None	Both
162	Bond-Lamberty et al.	2004	Canada	BOREAS NSA-W1989	55°53'N	98°20'W	55.9	-98.98	2	Top	Boreal	forest	15	25	20	1.3	5.17	20.2755	0.9505	17.5	53.65	68.2	0.8	450	35.7	32.6	31.7	426.041	0.3962	592	82	365	Field	warmed consecutively	Weeding	Both
163	Bond-Lamberty et al.	2004	Canada	BOREAS NSA-D1989	55°53'N	98°20'W	55.91	-98.98	2	Top	Boreal	forest	15	25	20	1.3	5.17	20.2755	0.9505	17.5	53.65	68.2	0.8	450	35.7	32.6	31.7	426.041	0.3263	588	82	365	Field	warmed consecutively	Weeding	Both
164	Bond-Lamberty et al.	2004	Canada	BOREAS NSA-D1995	55°53'N	98°20'W	56.46	-99.97	2	Top	Boreal	forest	15	25	20	1.3	5.4	18.848	0.89	17	51	71.2	0.8	450	35.8	32.6	31.6	378.703	0.3759	584	82	365	Field	warmed consecutively	Weeding	Both
165	Bond-Lamberty et al.	2004	Canada	BOREAS NSA-W1995	55°53'N	98°20'W	56.46	-99.98	2	Top	Boreal	forest	15	25	20	1.3	5.4	18.848	0.89	17	51	71.2	0.8	450	35.8	32.6	31.6	378.703	0.3759	584	82	365	Field	warmed consecutively	Weeding	Both
166	Bond-Lamberty et al.	2004	Canada	BOREAS NSA-W1989	55°53'N	98°20'W	55.9	-98.98	2	Top	Boreal	forest	5	15	10	1.5	5.17	20.2755	0.9505	17.5	53.65	68.2	0.8	450	35.7	32.6	31.7	426.041	0.3962	592	82	365	Field	warmed consecutively	Weeding	Both
167	Bond-Lamberty et al.	2004	Canada	BOREAS NSA-D1995	55°53'N	98°20'W	56.46	-99.97	2	Top	Boreal	forest	5	15	10	1.5	5.4	18.848	0.89	17	51	71.2	0.8	450	35.8	32.6	31.6	426.041	0.3759	584	82	365	Field	warmed consecutively	Weeding	Both
168	Bond-Lamberty et al.	2004	Canada	BOREAS NSA-W1995	55°53'N	98°20'W	56.46	-99.98	2	Top	Boreal	forest	5	15	10	1.5	5.4	18.848	0.89	17	51	71.2	0.8	450	35.8	32.6	31.6	378.703	0.3759	584	82	365	Field	warmed consecutively	Weeding	Both
169	Bond-Lamberty et al.	2004	Canada	BOREAS NSA-D1998	55°53'N	98°20'W	56.63	-99.94	2	Top	Boreal	forest	15	25	20	1.3	4.9742	13.3406	0.65503	15.874	37.845	54.734	0.8	450	43.149	24.34	26.911	378.703	0.3707	577	82	365	Field	warmed consecutively	Weeding	Both
170	Bond-Lamberty et al.	2004	Canada	BOREAS NSA-W1998	55°53'N	98°20'W	56.63	-99.94	2	Top	Boreal	forest	15	25	20	1.3	4.9742	13.3406	0.65503	15.874	37.845	54.734	0.8	450	43.149	24.34	26.911	378.703	0.3707	577	82	365	Field	warmed consecutively	Weeding	Both
171	Bond-Lamberty et al.	2004	Canada	BOREAS NSA-D1998	55°53'N	98°20'W	56.63	-99.94	2	Top	Boreal	forest	5	15	10	1.5	4.9742	13.3406	0.65503	15.874	37.845	54.734	0.8	450	43.149	24.34	26.911	378.703	0.3707	577	82	365	Field	warmed consecutively	Weeding	Both
172	Bond-Lamberty et al.	2004	Canada	BOREAS NSA-W1998	55°53'N	98°20'W	56.63	-99.94	2	Top	Boreal	forest	5	15	10	1.5	4.9742	13.3406	0.65503	15.874	37.845	54.734	0.8	450	43.149	24.34	26.911	378.703	0.3707	577	82	365	Field	warmed consecutively	Weeding	Both
173	Boone et al.	1998	USA	Harvard Forest	42°30'N	72°12'W	42.5	-72.2	5	Top	Temperate	forest	2	22	12	3.5	4.4368	2.60883	0.20576	15.48	13.215	33.227	6	1100	55.128	12.842	26.43	447.864	0.6583	952	68	240	Field	warmed consecutively	Control	Both
174	Boone et al.	1998	USA	Harvard Forest	42°30'N	72°12'W	42.5	-72.2	5	Top	Temperate	forest	2	22	12	3.4	4.4368	2.60883	0.20576	15.48	13.215	33.227	6	1100	55.128	12.842	26.43	447.864	0.6583	952	68	240	Field	warmed consecutively	Doubel Litter	Both
175	Boone et al.	1998	USA	Harvard Forest	42°30'N	72°12'W	42.5	-72.2	5	Top	Temperate	forest	2	22	12	3.1	4.4368	2.60883	0.20576	15.48	13.215	33.227	6	1100	55.128	12.842	26.43	447.864	0.6583	952	68	240	Field	warmed consecutively	No Litter	Both
176	Boone et al.	1998	USA	Harvard Forest	42°30'N	72°12'W	42.5	-72.2	5	Top	Temperate	forest	2	22	12	2.5	4.4368	2.60883	0.20576	15.48	13.215	33.227	6	1100	55.128	12.842	26.43	447.864	0.6583	952	68	240	Field	warmed consecutively	No Roots	Both
177	Boone et al.	1998	USA	Harvard Forest	42°30'N	72°12'W	42.5	-72.2	5	Top	Temperate	forest	2	22	12	2.3	4.4368	2.60883	0.20576	15.48	13.215	33.227	6	1100	55.128	12.842	26.43	447.864	0.6583	952	68	240	Field	warmed consecutively	No Inputs	Both
178	Boone et al.	1998	USA	Harvard Forest	42°30'N	72°12'W	42.5	-72.2	5	Top	Temperate	forest	2	22	12	2.6	4.4368	2.60883	0.20576	15.48	13.215	33.227	6	1100	55.128	12.842	26.43	447.864	0.6583	952	68	240	Field	warmed consecutively	OA-Less	Both
179	Borken et al.	2002	Germany	Solling	51° 46'N	9° 34'E	51.7667	9.56667	10	Top	Temperate	forest	5	15	10	3.11	5.9125	1.20259	0.10891	11.502	12.882	67.219	8	1038	45.427	24.352	30.221	193.591	0.7004	661	81	519	Field	warmed consecutively	None	Both
180	Borken et al.	2002	Germany	Solling	51° 46'N	9° 34'E	51.7667	9.56667	0	Top	Temperate	forest	5	15	10	1.83	5.9125	1.20259	0.10891	11.502	12.882	67.219	8	1038	45.427	24.352	30.221	193.591	0.7004	661	81	519	Field	warmed consecutively	None	Both
181	Borken et al.	2002	Germany	Unterlüß	52°50'N	10° 16'E	52.8333	10.2667	0	Top	Temperate	forest	5	15	10	1.9	4.64	2.855	0.118	20.7	5.9	25.3	8.4	837	78.4	6.6	15	251.255	0.6993	725	81	519	Field	warmed consecutively	None	Both
182	Borken et al.	2002	Germany	Unterlüß	52°50'N	10° 16'E	52.8333	10.2667	2.5	Top	Temperate	forest	5	15	10	2.92	4.64	2.855	0.118	20.7	5.9	25.3	8.4	837	78.4	6.6	15	251.255	0.6993	725	81	519	Field	warmed consecutively	None	Both
183	Borken et al.	2002	Germany	Unterlüß	52°50'N	10° 16'E	52.8333	10.2667	5	Top	Temperate	forest	5	15	10	3.46	4.64	2.855	0.118	20.7	5.9	25.3	8.4	837	78.4	6.6	15	251.255	0.6993	725	81	519	Field	warmed consecutively	None	Both
184	Borken et al.	2002	Germany	Unterlüß	52°50'N	10° 16'E	52.8333	10.2667	10	Top	Temperate	forest	5	15	10	3.69	4.64	2.855	0.118	20.7	5.9	25.3	8.4	837	78.4	6.6	15	251.255	0.6993	725	81	519	Field	warmed consecutively	None	Both
185	Borken et al.	2002	Germany	Unterlüß	52°50'N	10° 17'E	52.8333	10.2833	0	Top	Temperate	forest	5	15	10	1.87	4.64	2.855	0.118	20.7	5.9	25.3	8.4	837	78.4	6.6	15	251.255	0.6993	724	81	519	Field	warmed consecutively	None	Both
186	Borken et al.	2002	Germany	Unterlüß	52°50'N	10° 17'E	52.8333	10.2833	2.5	Top	Temperate	forest	5	15	10	2.9	4.64	2.855	0.118	20.7	5.9	25.3	8.4	837	78.4	6.6	15	251.255	0.6993	724	81	519	Field	warmed consecutively	None	Both
187	Borken et al.	2002	Germany	Unterlüß	52°50'N	10° 17'E	52.8333	10.2833	5	Top	Temperate	forest	5	15	10	3.42	4.64	2.855	0.118	20.7	5.9	25.3	8.4	837	78.4	6.6	15	251.255	0.6993	724	81	519	Field	warmed consecutively	None	Both
188	Borken et al.	2002	Germany	Unterlüß	52°50'N	10° 17'E	52.8333	10.2833	10	Top	Temperate	forest	5	15	10	3.48	4.64	2.855	0.118	20.7	5.9	25.3	8.4	837	78.4	6.6	15	251.255	0.6993	724	81	519	Field	warmed consecutively	None	Both
189	Borken et al.	2002	Germany	Unterlüß	52°50'N	10° 18'E	52.8333	10.3	0	Top	Temperate	forest	5	15	10	1.81	4.64	2.855	0.118	20.7	5.9	25.3	8.4	837	78.4	6.6	15	251.255	0.6698	727	81	519	Field	warmed consecutively	None	Both
190	Borken et al.	2002	Germany	Unterlüß	52°50'N	10° 18'E	52.8333	10.3	2.5	Top	Temperate	forest	5	15	10	2.94	4.64	2.855	0.118	20.7	5.9	25.3	8.4	837	78.4	6.6	15	251.255	0.6698	727	81	519	Field	warmed consecutively	None	Both
191	Borken et al.	2002	Germany	Unterlüß	52°50'N	10° 18'E	52.8333	10.3	5	Top	Temperate	forest	5	15	10	3.5	4.64	2.855	0.118	20.7	5.9	25.3	8.4	837	78.4	6.6	15	251.255	0.6698	727	81	519	Field	warmed consecutively	None	Both
192	Borken et al.	2002	Germany	Unterlüß	52°50'N	10° 18'E	52.8333	10.3	10	Top	Temperate	forest	5	15	10	3.57	4.64	2.855	0.118	20.7	5.9	25.3	8.4	837	78.4	6.6	15	251.255	0.6698	727	81	519	Field	warmed consecutively	None	Both
193	Borken et al.	2002	Germany	Solling	51° 34'N	9° 40'E	51.5667	9.66667	0	Top	Temperate	forest	5	15	10	2.12	5.9125	1.20259	0.10891	11.502	12.882	67.219	7.5	900	45.427	24.352	30.221	193.591	0.6022	697	81	519	Field	warmed consecutively	None	Both
194	Borken et al.	2002	Germany	Solling	51° 34'N	9° 40'E	51.5667	9.66667	2.5	Top	Temperate	forest	5	15	10	3.02	5.9125	1.20259	0.10891	11.502	12.882	67.219	7.5	900	45.427	24.352	30.221	193.591	0.6022	697	81	519	Field	warmed consecutively	None	Both
195	Borken et al.	2002	Germany	Solling	51° 34'N	9° 40'E	51.5667	9.66667	5	Top	Temperate	forest	5	15	10	3.59	5.9125	1.20259	0.10891	11.502	12.882	67.219	7.5	900	45.427	24.352	30.221	193.591	0.6022	697	81	519	Field	warmed consecutively	None	Both
196	Borken et al.	2002	Germany	Solling	51° 34'N	9° 40'E	51.5667	9.66667	10	Top	Temperate	forest	5	15	10	3.84	5.9125	1.20259	0.10891	11.502	12.882	67.219	7.5	900	45.427	24.352	30.221	193.591	0.6022	697	81	519	Field	warmed consecutively	None	Both
197	Borken et al.	2002	Germany	Solling	51° 46'N	9° 35'E	51.7667	9.58333	0	Top	Temperate	forest	5	15	10	1.7	5.9125	1.20259	0.10891	11.502	12.882	67.219	8	1038	45.427	24.352	30.221	193.591	0.7004	657	81	519	Field	warmed consecutively	None	Both
198	Borken et al.	2002	Germany	Solling	51° 46'N	9° 35'E	51.7667	9.58333	2.5	Top	Temperate	forest	5	15	10	2.71	5.9125	1.20259	0.10891	11.502	12.882	67.219	8	1038	45.427	24.352	30.221	193.591	0.7004	657	81	519	Field	warmed consecutively	None	Both
199	Borken et al.	2002	Germany	Solling	51° 46'N	9° 35'E	51.7667	9.58333	5	Top	Temperate	forest	5	15	10	2.97	5.9125	1.20259	0.10891	11.502	12.882	67.219	8	1038	45.427	24.352	30.221	193.591	0.7004	657	81	519	Field	warmed consecutively	None	Both
200	Borken et al.	2002	Germany	Solling	51° 46'N	9° 35'E	51.7667	9.58333	10	Top	Temperate	forest	5	15	10	3.06	5.9125	1.20259	0.10891	11.502	12.882	67.219	8	1038	45.427	24.352	30.221	193.591	0.7004	657	81	519	Field	warmed consecutively	None	Both
201	Borken et al.	2002	Germany	Solling	51° 46'N	9° 34'E	51.7667	9.56667	2.5	Top	Temperate	forest	5	15	10	2.5	5.9125	1.20259	0.10891	11.502	12.882	67.219	8	1038	45.427	24.352	30.221	193.591	0.7004	661	81	519	Field	warmed consecutively	None	Both
202	Borken et al.	2002	Germany	Solling	51° 46'N	9° 34'E	51.7667	9.56667	5	Top	Temperate	forest	5	15	10	2.88	5.9125	1.20259	0.10891	11.502	12.882	67.219	8	1038	45.427	24.352	30.221	193.591	0.7004	661	81	519	Field	warmed consecutively	None	Both
203	Borken et al.	2006	USA	Harvard Forest-Prospect Hill	42°32'N	72°11'W	42.53	-72.18	10	Top	Temperate	forest	0	20	10	3.9	4.7068	2.83488	0.22057	16.359	14.164	35.32	8.5	1050	58.293	13.778	27.929	447.864	0.6698	923	68	916	Field	warmed consecutively	None	Both
204	Borken et al.	2006	USA	Harvard Forest-Prospect Hill	42°32'N	72°11'W	42.53	-72.18	10	Top	Temperate	forest	0	20	10	3	4.7068	2.83488	0.22057	16.359	14.164	35.32	8.5	1050	58.293	13.778	27.929	447.864	0.6698	923	68	916	Field	warmed consecutively	None	Both
205	Bowden et al.	2004	USA	Harvard Forest	42°30'N	72°20'W	42.5	-72.33	2.5	Top	Temperate	forest	0	10	5	1.36	3.2	2.60883	0.20576	15.48	13.215	33.227	8.5	1120	55.128	12.842	26.43	447.864	0.6952	933	68	734	Field	warmed consecutively	Fertilized	Both
206	Bowden et al.	2004	USA	Harvard Forest	42°30'N	72°20'W	42.5	-72.33	2.5	Top	Temperate	forest	0	10	5	1.24	3.2	2.60883	0.20576	15.48	13.215	33.227	8.5	1120	55.128	12.842	26.43	447.864	0.6952	933	68	734	Field	warmed consecutively	Fertilized	Both
207	Bowden et al.	2004	USA	Harvard Forest	42°30'N	72°20'W	42.5	-72.33	2.5	Top	Temperate	forest	0	10	5	1.17	3.2	2.60883	0.20576	15.48	13.215	33.227	8.5	1120	55.128	12.842	26.43	447.864	0.6952	933	68	734	Field	warmed consecutively	Fertilized	Both
208	Bowden et al.	2004	USA	Harvard Forest	42°30'N	72°20'W	42.5	-72.33	2.5	Top	Temperate	forest	0	10	5	2.09	3.3	2.60883	0.20576	15.48	13.215	33.227	8.5	1120	55.128	12.842	26.43	447.864	0.6952	933	68	734	Field	warmed consecutively	Fertilized	Both
209	Bowden et al.	2004	USA	Harvard Forest	42°30'N	72°20'W	42.5	-72.33	2.5	Top	Temperate	forest	0	20	10	2.06	3.2	2.60883	0.20576	15.48	13.215	33.227	8.5	1120	55.128	12.842	26.43	447.864	0.6952	933	68	734	Field	warmed consecutively	Fertilized	Both
210	Bowden et al.	2004	USA	Harvard Forest	42°30'N	72°20'W	42.5	-72.33	2.5	Top	Temperate	forest	0	20	10	1.78	3.2	2.60883	0.20576	15.48	13.215	33.227	8.5	1120	55.128	12.842	26.43	447.864	0.6952	933	68	734	Field	warmed consecutively	Fertilized	Both
211	Bowden et al.	2004	USA	Harvard Forest	42°30'N	72°20'W	42.5	-72.33	2.5	Top	Temperate	forest	0	20	10	1.51	3.2	2.60883	0.20576	15.48	13.215	33.227	8.5	1120	55.128	12.842	26.43	447.864	0.6952	933	68	734	Field	warmed consecutively	Fertilized	Both
212	Bowden et al.	2004	USA	Harvard Forest	42°30'N	72°20'W	42.5	-72.33	2.5	Top	Temperate	forest	0	20	10	4.47	3.3	2.60883	0.20576	15.48	13.215	33.227	8.5	1120	55.128	12.842	26.43	447.864	0.6952	933	68	734	Field	warmed consecutively	Fertilized	Both
213	Bowden et al.	2004	USA	Harvard Forest	42°30'N	72°20'W	42.5	-72.33	2.5	Top	Temperate	forest	10	20	15	3.12	3.2	2.60883	0.20576	15.48	13.215	33.227	8.5	1120	55.128	12.842	26.43	447.864	0.6952	933	68	734	Field	warmed consecutively	Fertilized	Both
214	Bowden et al.	2004	USA	Harvard Forest	42°30'N	72°20'W	42.5	-72.33	2.5	Top	Temperate	forest	10	20	15	2.56	3.2	2.60883	0.20576	15.48	13.215	33.227	8.5	1120	55.128	12.842	26.43	447.864	0.6952	933	68	734	Field	warmed consecutively	Fertilized	Both
215	Bowden et al.	2004	USA	Harvard Forest	42°30'N	72°20'W	42.5	-72.33	2.5	Top	Temperate	forest	10	20	15	1.94	3.2	2.60883	0.20576	15.48	13.215	33.227	8.5	1120	55.128	12.842	26.43	447.864	0.6952	933	68	734	Field	warmed consecutively	Fertilized	Both
216	Bowden et al.	2004	USA	Harvard Forest	42°30'N	72°20'W	42.5	-72.33	2.5	Top	Temperate	forest	5	15	10	1.93	3.2	2.60883	0.20576	15.48	13.215	33.227	8.5	1120	55.128	12.842	26.43	447.864	0.6952	933	68	734	Field	warmed consecutively	Fertilized	Both
217	Bowden et al.	2004	USA	Harvard Forest	42°30'N	72°20'W	42.5	-72.33	2.5	Top	Temperate	forest	5	15	10	1.64	3.2	2.60883	0.20576	15.48	13.215	33.227	8.5	1120	55.128	12.842	26.43	447.864	0.6952	933	68	734	Field	warmed consecutively	Fertilized	Both
218	Bowden et al.	2004	USA	Harvard Forest	42°30'N	72°20'W	42.5	-72.33	2.5	Top	Temperate	forest	5	15	10	1.41	3.2	2.60883	0.20576	15.48	13.215	33.227	8.5	1120	55.128	12.842	26.43	447.864	0.6952	933	68	734	Field	warmed consecutively	Fertilized	Both
219	Bowne et al.	2013	USA				40.1528	-76.6027	0	Top	Temperate	agriculture	10	20	15	1.8	5.0664	0.95713	0.0928	10.252	8.921	50.442	11.1583	1061	45.58	21.99	24.13	297.14	0.5482	1033	70	70	Field	warmed consecutively	None	Both
220	Bridge et al.	1983	Australia	Katherine			-14.6	132.2	2.5	Top	Tropical	grassland	20	40	30	1.8	7.3885	0.67664	0.06868	20	9.719	92.236	25	983	58.143	19.24	22.617	297.14	0.4564	2058	56	548	Field	warmed consecutively	Burned	Both
221	Brito et al.	2009	Brazil	Santa Isabel Farm	21°17'N	48°08'W	-21.29	-48.15	15	Top	Tropical	agriculture	10	20	15	1.98	5.8	0.935	0.085	12	7	71.5	22.14	1351	13.5	25.5	61	867.736	0.6015	1609	69	245	Field	warmed consecutively	None	Both
222	Brito et al.	2009	Brazil	Santa Isabel Farm	21°17'N	48°08'W	-21.29	-48.15	15	Top	Tropical	agriculture	10	20	15	1.81	5.8	0.935	0.085	12	7	71.5	22.14	1351	16.67	25.67	57.67	867.736	0.6015	1609	69	245	Field	warmed consecutively	None	Both
223	Brito et al.	2009	Brazil	Santa Isabel Farm	21°17'N	48°08'W	-21.29	-48.15	15	Top	Tropical	agriculture	10	20	15	1.71	5.8	0.935	0.085	12	7	71.5	22.14	1351	16	23.367	60.633	867.736	0.6015	1609	69	245	Field	warmed consecutively	None	Both
224	Brito et al.	2013	Spain				28.306	-16.5683	2	Top	Temperate	forest	5	25	15	1.79	3.0895	0.90063	0.07683	5.126	7.427	34.934	10.7	368	22.465	10.767	13.968	867.736	0.6346	899	71	7	Field	parallel independent samples	None	Both
225	Bronson et al.	2008	Canada	Boreal Soil and Air Warming Experiment	55°53'N	98°20'W	55.5	-98.5	10	Top	Boreal	forest	0	20	10	4	4.8024	21.0833	0.98216	17.492	54.696	63.384	-2.65	510	34.616	31.676	30.908	426.041	0.4253	598	82	400	Field	warmed consecutively	None	Both
226	Bronson et al.	2008	Canada	Boreal Soil and Air Warming Experiment	55°53'N	98°20'W	55.5	-98.5	10	Top	Boreal	forest	0	20	10	2.58	4.8024	21.0833	0.98216	17.492	54.696	63.384	-2.65	510	34.616	31.676	30.908	426.041	0.4253	598	82	400	Field	warmed consecutively	None	Both
227	Brumme et al.	1995	Germany	Solling			51.73	9.65	5	Top	Temperate	forest	5	15	10	2.3	5.9125	1.20259	0.10891	11.5	12.882	67.219	7.7	965	45.427	24.352	30.221	193.591	0.6277	688	81	180	Field	warmed consecutively	None	Both
228	Brumme et al.	1995	Germany	Solling			51.73	9.65	5	Top	Temperate	forest	5	15	10	2.3	5.9125	1.20259	0.10891	11.5	12.882	67.219	7.7	965	45.427	24.352	30.221	193.591	0.6277	688	81	180	Field	warmed consecutively	None	Both
229	Brumme et al.	1995	Germany	Solling			51.73	9.65	5	Top	Temperate	forest	5	15	10	2.5	5.9125	1.20259	0.10891	11.5	12.882	67.219	7.7	965	45.427	24.352	30.221	193.591	0.6277	688	81	180	Field	warmed consecutively	None	Both
230	Brumme et al.	1995	Germany	Solling			51.73	9.65	5	Top	Temperate	forest	5	15	10	2.8	5.9125	1.20259	0.10891	11.5	12.882	67.219	7.7	965	45.427	24.352	30.221	193.591	0.6277	688	81	180	Field	warmed consecutively	None	Both
231	Brumme et al.	1995	Germany	Solling			51.73	9.65	5	Top	Temperate	forest	5	15	10	2	5.9125	1.20259	0.10891	11.5	12.882	67.219	7.7	965	45.427	24.352	30.221	193.591	0.6277	688	81	180	Field	warmed consecutively	None	Both
232	Brumme et al.	1995	Germany	Solling			51.73	9.65	5	Top	Temperate	forest	5	15	10	2.2	5.9125	1.20259	0.10891	11.5	12.882	67.219	7.7	965	45.427	24.352	30.221	193.591	0.6277	688	81	180	Field	warmed consecutively	None	Both
233	Brumme et al.	1995	Germany	Solling			51.73	9.65	5	Top	Temperate	forest	5	15	10	1.9	5.9125	1.20259	0.10891	11.5	12.882	67.219	7.7	965	45.427	24.352	30.221	193.591	0.6277	688	81	180	Field	warmed consecutively	None	Both
234	Brumme et al.	1995	Germany	Solling			51.73	9.65	5	Top	Temperate	forest	5	15	10	2.7	5.9125	1.20259	0.10891	11.5	12.882	67.219	7.7	965	45.427	24.352	30.221	193.591	0.6277	688	81	180	Field	warmed consecutively	None	Both
235	Brumme et al.	1995	Germany	Solling			51.73	9.65	5	Top	Temperate	forest	5	15	10	1.3	5.9125	1.20259	0.10891	11.5	12.882	67.219	7.7	965	45.427	24.352	30.221	193.591	0.6277	688	81	180	Field	warmed consecutively	None	Both
236	Brumme et al.	1995	Germany	Solling			51.73	9.65	5	Top	Temperate	forest	5	15	10	2.4	5.9125	1.20259	0.10891	11.5	12.882	67.219	7.7	965	45.427	24.352	30.221	193.591	0.6277	688	81	180	Field	warmed consecutively	None	Both
237	Brumme et al.	1995	Germany	Solling			51.73	9.65	5	Top	Temperate	forest	5	15	10	2.1	5.9125	1.20259	0.10891	11.5	12.882	67.219	7.7	965	45.427	24.352	30.221	193.591	0.6277	688	81	180	Field	warmed consecutively	None	Both
238	Brye et al.	2009	USA	Wisconsin			43.07	-89.82	10	Top	Temperate	grassland	0	20	10	1.6	6.5741	1.00935	0.10031	11.04	11.325	89.775	7.3	829	51.215	22.357	26.428	184.489	0.4847	947	74	365	Field	warmed consecutively	None	Both
239	Brye et al.	2009	USA	Wisconsin			43.07	-89.82	10	Top	Temperate	grassland	0	20	10	1.55	6.5741	1.00935	0.10031	11.04	11.325	89.775	7.3	829	51.215	22.357	26.428	184.489	0.4847	947	74	365	Field	warmed consecutively	None	Both
240	Brye et al.	2009	USA	Wisconsin			43.07	-89.82	10	Top	Temperate	agriculture	0	20	10	1.35	6.5741	1.00935	0.10031	11.04	11.325	89.775	7.3	829	51.215	22.357	26.428	184.489	0.4847	947	74	365	Field	warmed consecutively	None	Both
241	Buchmann	2000	Germany	Fichtelgebirge	50°08'N	11°52'E	50.1333	11.8667	5	Top	Temperate	forest	5	15	10	2.41	5.2004	1.46705	0.12781	12.335	11.164	40.269	5.79	1092	48.062	22.257	29.681	363.889	0.6025	645	79	200	Field	warmed consecutively	None	Both
242	Buchmann	2000	Germany	Fichtelgebirge	50°08'N	11°52'E	50.1333	11.8667	10	Top	Temperate	forest	5	15	10	2.34	5.2004	1.46705	0.12781	12.335	11.164	40.269	5.79	1092	48.062	22.257	29.681	363.889	0.6025	645	79	200	Field	warmed consecutively	None	Both
243	Buchmann	2000	Germany	Fichtelgebirge	50°08'N	11°52'E	50.1333	11.8667	15	Top	Temperate	forest	5	15	10	2.34	5.2004	1.46705	0.12781	12.335	11.164	40.269	5.79	1092	48.062	22.257	29.681	363.889	0.6025	645	79	200	Field	warmed consecutively	None	Both
244	Buchmann	2000	Germany	Fichtelgebirge	50°08'N	11°52'E	50.1333	11.8667	5	Top	Temperate	forest	5	15	10	3.22	5.2004	1.46705	0.12781	12.335	11.164	40.269	5.79	1092	48.062	22.257	29.681	363.889	0.6025	645	79	200	Field	warmed consecutively	None	Both
245	Buchmann	2000	Germany	Fichtelgebirge	50°08'N	11°52'E	50.1333	11.8667	10	Top	Temperate	forest	5	15	10	4.11	5.2004	1.46705	0.12781	12.335	11.164	40.269	5.79	1092	48.062	22.257	29.681	363.889	0.6025	645	79	200	Field	warmed consecutively	None	Both
246	Buchmann	2000	Germany	Fichtelgebirge	50°08'N	11°52'E	50.1333	11.8667	15	Top	Temperate	forest	5	15	10	4.11	5.2004	1.46705	0.12781	12.335	11.164	40.269	5.79	1092	48.062	22.257	29.681	363.889	0.6025	645	79	200	Field	warmed consecutively	None	Both
247	Buchmann	2000	Germany	Fichtelgebirge	50°08'N	11°52'E	50.1333	11.8667	5	Top	Temperate	forest	5	15	10	2.87	5.2004	1.46705	0.12781	12.335	11.164	40.269	5.79	1092	48.062	22.257	29.681	363.889	0.6025	645	79	200	Field	warmed consecutively	None	Both
248	Buchmann	2000	Germany	Fichtelgebirge	50°08'N	11°52'E	50.1333	11.8667	10	Top	Temperate	forest	5	15	10	3.27	5.2004	1.46705	0.12781	12.335	11.164	40.269	5.79	1092	48.062	22.257	29.681	363.889	0.6025	645	79	200	Field	warmed consecutively	None	Both
249	Buchmann	2000	Germany	Fichtelgebirge	50°08'N	11°52'E	50.1333	11.8667	15	Top	Temperate	forest	5	15	10	3.27	5.2004	1.46705	0.12781	12.335	11.164	40.269	5.79	1092	48.062	22.257	29.681	363.889	0.6025	645	79	200	Field	warmed consecutively	None	Both
250	Buchmann	2000	Germany	Fichtelgebirge	50°08'N	11°52'E	50.1333	11.8667	5	Top	Temperate	forest	5	15	10	2.39	5.2004	1.46705	0.12781	12.335	11.164	40.269	5.79	1092	48.062	22.257	29.681	363.889	0.6025	645	79	200	Field	warmed consecutively	None	Both
251	Buchmann	2000	Germany	Fichtelgebirge	50°08'N	11°52'E	50.1333	11.8667	10	Top	Temperate	forest	5	15	10	2.82	5.2004	1.46705	0.12781	12.335	11.164	40.269	5.79	1092	48.062	22.257	29.681	363.889	0.6025	645	79	200	Field	warmed consecutively	None	Both
252	Buchmann	2000	Germany	Fichtelgebirge	50°08'N	11°52'E	50.1333	11.8667	15	Top	Temperate	forest	5	15	10	2.82	5.2004	1.46705	0.12781	12.335	11.164	40.269	5.79	1092	48.062	22.257	29.681	363.889	0.6025	645	79	200	Field	warmed consecutively	None	Both
253	Burton et al.	2002	USA	Bonanza Creek LTER	64 41N	148 14W	64.6833	-148.233	0 to 10	Top	Boreal	forest	6	24	15	2.9	5.3012	7.36346	0.38515	13.064	24.539	64.879	-3.3	287	39.801	28.396	31.803	321.889	0.3532	558	73	0.67	Lab	parallel independent samples	None	Autotrophic
254	Burton et al.	2002	USA	Bonanza Creek LTER	64 40N	148 15W	64.6667	-148.25	0 to 10	Top	Boreal	forest	6	24	15	2.4	5.3012	7.36346	0.38515	13.064	24.539	64.879	-3.3	287	39.801	28.396	31.803	321.889	0.3532	559	73	0.67	Lab	parallel independent samples	None	Autotrophic
255	Burton et al.	2002	USA	Pinus Plantation	30 37N	81 43W	30.6167	-81.7167	0 to 10	Top	Subtropical	agriculture	6	24	15	2.5	4.8872	3.04465	0.22058	12.971	11.515	50.338	20	1303	51.008	24.965	25.338	189.75	0.7738	1435	75	0.67	Lab	parallel independent samples	None	Autotrophic
256	Burton et al.	2002	USA	Quercus forest	33 25N	83 25W	33.4167	-83.4167	0 to 10	Top	Subtropical	forest	6	24	15	2.4	5.1636	0.88688	0.07634	11.55	6.2	50.316	16.5	1263	56.168	23.667	20.165	207	0.7236	1389	71	0.67	Lab	parallel independent samples	None	Autotrophic
257	Burton et al.	2002	USA	Upper Peninsula	46 39 N	88 28W	46.65	-88.4667	0 to 10	Top	Temperate	forest	6	24	15	2.7	3.9269	3.09067	0.20029	11.74	12.932	29.494	3.8	841	46.439	12.129	19.232	426.041	0.5429	840	77	0.67	Lab	parallel independent samples	None	Autotrophic
258	Burton et al.	2002	USA	Upper Peninsula	47 6 N	88 39W	47.1	-88.65	0 to 10	Top	Temperate	forest	6	24	15	3	1.4521	1.06277	0.06732	3.96	4.571	12.661	3.8	883	15.394	4.905	7.501	272.379	0.4688	777	79	0.67	Lab	parallel independent samples	None	Autotrophic
259	Burton et al.	2002	USA	Coweeta LTER	35 4N	83 26W	35.0667	-83.4333	0 to 10	Top	Temperate	forest	6	24	15	2.6	5.27484	0.99266	0.08863	11.219	7.833	51.816	12.7	1816	54.176	22.885	22.939	312	0.6868	1211	75	0.67	Lab	parallel independent samples	None	Autotrophic
260	Burton et al.	2002	USA	Coweeta LTER	35 3N	83 25W	35.05	-83.4167	0 to 10	Top	Temperate	forest	6	24	15	3.1	5.27484	0.99266	0.08863	11.219	7.833	51.816	11.1	2502	54.176	22.885	22.939	312	0.7124	1218	75	0.67	Lab	parallel independent samples	None	Autotrophic
261	Burton et al.	2002	USA	Coweeta LTER	35 3N	83 25W	35.05	-83.4167	0 to 10	Top	Temperate	forest	6	24	15	2.4	5.27484	0.99266	0.08863	11.219	7.833	51.816	9.4	2607	54.176	22.885	22.939	312	0.7124	1218	75	0.67	Lab	parallel independent samples	None	Autotrophic
262	Butnor et al.	2003	USA	Duke FACE	35°58'N	79°09'W	35.97	-79.13	5	Top	Subtropical	forest	9	23	16	3.16	5.28837	0.85081	0.07581	10.917	6.913	57.076	15.5	1140	55.974	23.362	20.664	253.5	0.6892	1268	71	220	Field	warmed consecutively	FACE (CO2)	Both
263	Butnor et al.	2003	USA	Duke FACE	35°58'N	79°09'W	35.97	-79.13	5	Top	Subtropical	forest	9	23	16	3.1	5.28837	0.85081	0.07581	10.917	6.913	57.076	15.5	1140	55.974	23.362	20.664	253.5	0.6892	1268	71	220	Field	warmed consecutively	FACE (CO2)	Both
264	Butnor et al.	2003	USA	Duke FACE	35°58'N	79°09'W	35.97	-79.13	5	Top	Subtropical	forest	9	23	16	2.57	5.28837	0.85081	0.07581	10.917	6.913	57.076	15.5	1140	55.974	23.362	20.664	253.5	0.6892	1268	71	220	Field	warmed consecutively	FACE (CO2)	Both
265	Butnor et al.	2003	USA	Duke FACE	35°58'N	79°09'W	35.97	-79.13	5	Top	Subtropical	forest	9	23	16	2.4	5.28837	0.85081	0.07581	10.917	6.913	57.076	15.5	1140	55.974	23.362	20.664	253.5	0.6892	1268	71	220	Field	warmed consecutively	FACE (CO2)	Both
266	Butnor et al.	2006	USA	Croatian National Forest			34.91	-77.06	5	Top	Subtropical	forest	10	20	15	2	3.8975	10.7657	0.80806	10.043	26.692	41.84	16	1360	33.166	18.949	20.185	207	0.784	1261	73	120	Field	warmed consecutively	None	Both
267	Butnor et al.	2006	USA	Croatian National Forest			34.91	-77.06	5	Top	Subtropical	forest	10	20	15	1.6	3.8975	10.7657	0.80806	10.043	26.692	41.84	16	1360	33.166	18.949	20.185	207	0.784	1261	73	120	Field	warmed consecutively	None	Both
268	Buyanovsky et al.	1986	USA	Sanborn Field			38.83	-92.33	10	Top	Temperate	agriculture	5	25	15	1.62	6.1538	1.08999	0.10988	10.778	13.773	85.02	12.5	973	46.467	24.785	28.748	272.379	0.6026	1136	70	970	Field	warmed consecutively	None	Both
269	Cahill et al	2009	USA	Driftless Area	43°4'12''N	89°49'12''W	43.07	-89.82	10	Top	Temperate	grassland	0	20	10	1.55116	5.99	0.212	0.019	11.041	11.325	89.775	8	778	43	42	15	184.489	0.4847	947	74	365	Field	warmed consecutively	None	Both
270	Cahill et al	2009	USA	Driftless Area	43°4'12''N	89°49'12''W	43.07	-89.82	10	Top	Temperate	grassland	0	20	10	1.59839	6.01	0.211	0.018	11.041	11.325	89.775	8	778	41	41	18	184.489	0.4847	947	74	365	Field	warmed consecutively	None	Both
271	Cahill et al	2009	USA	Driftless Area	43°4'12''N	89°49'12''W	43.07	-89.82	10	Top	Temperate	agriculture	0	20	10	1.34716	6.44	0.158	0.016	11.041	11.325	89.775	8	778	44	43	13	184.489	0.4847	947	74	365	Field	warmed consecutively	None	Both
272	Campbell et al.	2004	USA	East Cascades-mature			44.4	-121.7	10	Top	Temperate	forest	0	20	10	2.01	5.8857	2.10898	0.17538	12.8	17.601	47.508	8	520	49.565	22.835	27.6	940.01	0.5198	986	72	150	Field	parallel independent samples	None	Both
273	Campbell et al.	2004	USA	East Cascades-old			44.4	-121.7	10	Top	Temperate	forest	0	20	10	2.01	5.8857	2.10898	0.17538	12.8	17.601	47.508	8	520	49.565	22.835	27.6	940.01	0.5198	986	72	150	Field	parallel independent samples	None	Both
274	Campbell et al.	2004	USA	East Cascades-young			44.4	-121.7	10	Top	Temperate	forest	0	20	10	1.65	5.8857	2.10898	0.17538	12.8	17.601	47.508	8	520	49.565	22.835	27.6	940.01	0.5198	986	72	150	Field	parallel independent samples	None	Both
275	Campbell et al.	2004	USA	East Cascades-initiation			44.4	-121.7	10	Top	Temperate	forest	0	20	10	1.49	5.8857	2.10898	0.17538	12.8	17.601	47.508	8	520	49.565	22.835	27.6	940.01	0.5198	986	72	150	Field	parallel independent samples	None	Both
276	Campbell et al.	2004	USA	West Cascades-initiation			44.2	-122.2	10	Top	Temperate	forest	0	20	10	3	5.0041	2.60116	0.20936	13.84	16.803	26.239	11.1	2100	49.929	24.114	25.957	867.736	0.8253	954	72	150	Field	parallel independent samples	None	Both
277	Campbell et al.	2004	USA	West Cascades-young			44.2	-122.2	10	Top	Temperate	forest	0	20	10	2.46	5.0041	2.60116	0.20936	13.84	16.803	26.239	11.1	2100	49.929	24.114	25.957	867.736	0.8253	954	72	150	Field	parallel independent samples	None	Both
278	Campbell et al.	2004	USA	West Cascades-old			44.2	-122.2	10	Top	Temperate	forest	0	20	10	2.46	5.0041	2.60116	0.20936	13.84	16.803	26.239	11.1	2100	49.929	24.114	25.957	867.736	0.8253	954	72	150	Field	parallel independent samples	None	Both
279	Campbell et al.	2004	USA	West Cascades-mature			44.2	-122.2	10	Top	Temperate	forest	0	20	10	2.23	5.0041	2.60116	0.20936	13.84	16.803	26.239	11.1	2100	49.929	24.114	25.957	867.736	0.8253	954	72	150	Field	parallel independent samples	None	Both
280	Campbell et al.	2004	USA	Coast Range-mature			45.1	-123.9	10	Top	Temperate	forest	0	20	10	3	5.57	2.422	0.2	12.2	19.8	44.9	5.5	2800	42.8	27.3	29.9	297.14	0.6856	827	83	150	Field	parallel independent samples	None	Both
281	Campbell et al.	2004	USA	Coast Range-old			45.1	-123.9	10	Top	Temperate	forest	0	20	10	3	5.57	2.422	0.2	12.2	19.8	44.9	5.5	2800	42.8	27.3	29.9	297.14	0.6856	827	83	150	Field	parallel independent samples	None	Both
282	Campbell et al.	2004	USA	Coast Range-young			45.1	-123.9	10	Top	Temperate	forest	0	20	10	2.23	5.57	2.422	0.2	12.2	19.8	44.9	5.5	2800	42.8	27.3	29.9	297.14	0.6856	827	83	150	Field	parallel independent samples	None	Both
283	Campbell et al.	2004	USA	Coast Range-initiation			45.1	-123.9	10	Top	Temperate	forest	0	20	10	1.82	5.57	2.422	0.2	12.2	19.8	44.9	5.5	2800	42.8	27.3	29.9	297.14	0.6856	827	83	150	Field	parallel independent samples	None	Both
284	Camporese et al.	2008	Italy	Zennare Basin-Cordenazzo			45.35	12.32	5	Top	Temperate	agriculture	0	20	10	2.55	4.1463	0.56683	0.05707	6.7	8.687	54.881	15	700	27.27	14.711	19.119	297.14	0.1419	875	74	12	Field	warmed consecutively	None	Both
285	Camporese et al.	2008	Italy	Zennare Basin-Viale			45.35	12.32	5	Top	Temperate	agriculture	0	20	10	1.73	4.1463	0.56683	0.05707	6.7	8.687	54.881	15	700	27.27	14.711	19.119	297.14	0.1419	875	74	12	Field	warmed consecutively	None	Both
286	Campos C. et al.	2006	Mexico	Cofre de Perote	19°30'09''N	96°59'10''W	19.53	-96.99	10	Top	Tropical	forest	12	20	16	1.18	4	9.02	0.79	11.38	28.833	92.284	19.3	2081	32.133	41.167	26.7	272.379	0.8087	1321	75	395	Field	warmed consecutively	None	Both
287	Campos C. et al.	2006	Mexico	Cofre de Perote	19°30'09''N	96°59'10''W	19.53	-96.99	10	Top	Tropical	grassland	13	24	18.5	1.18	4.3	13.86	0.93	11.38	28.833	92.284	19.3	2081	32.133	41.167	26.7	272.379	0.8087	1321	75	395	Field	warmed consecutively	None	Both
288	Campos C. et al.	2006	Mexico	Cofre de Perote	19°30'09''N	96°59'10''W	19.53	-96.99	10	Top	Tropical	agriculture	13	27	20	1.18	4.42	6.06	0.45	11.38	28.833	92.284	19.3	2081	32.133	41.167	26.7	272.379	0.8087	1321	75	395	Field	warmed consecutively	None	Both
289	Cao et al.	2004	China	Haibei Research Station	37°32'N	101°15'E	37.5333	101.25	0	Top	Temperate	grassland	10	25	17.5	1.67	5.198	1.15963	0.10561	8.161	13.965	68.578	-1.7	560	28.382	21.934	23.284	363.889	0.3351	745	7	17	Field	warmed consecutively	None	Both
290	Cao et al.	2004	China	Haibei Research Station	37°32'N	101°15'E	37.5333	101.25	0	Top	Temperate	grassland	5	30	17.5	1.47	5.198	1.15963	0.10561	8.161	13.965	68.578	-1.7	560	28.382	21.934	23.284	363.889	0.3351	745	7	17	Field	warmed consecutively	None	Both
291	Caprez et al.	2012	Switzerland	Deciduous Forest	46°36'16''N	8°31'10''E	46.61	8.52	10	Top	Temperate	forest	0	20	10	2.1	6.7798	3.27	0.12794	11.18	13.577	84.5	5.4	743	47.375	23.596	29.029	1323.81	0.2182	473	76	335	Field	warmed consecutively	None	Both
292	Caprez et al.	2012	Switzerland	Deciduous Forest	47°32'37''N	8°E	47.55	8	10	Top	Temperate	forest	0	20	10	2.2	5.81	5.82	0.12016	17.11	11.565	60.654	10.5	833	49.432	21.966	28.602	321.889	0.6549	804	77	335	Field	warmed consecutively	None	Both
293	Carbone et al.	2008	USA	Owens Valley	37°60'N	118°60'W	37.41	-118.43	2	Top	Subtropical	grassland	10	20	15	1.24	8.5	6.1	0.4	12.24	9.905	95.432	13.33	150	56.784	19.402	23.814	447.864	0.1336	1461	36	150	Field	warmed consecutively	None	Both
294	Carbone et al.	2008	USA	Owens Valley	37°60'N	118°60'W	37.32	-118.36	2	Top	Subtropical	grassland	10	20	15	1.55	9.1	0.52	0.04	12.24	9.905	95.432	13.42	150	56.784	19.402	23.814	447.864	0.321	1487	39	150	Field	warmed consecutively	None	Both
295	Carlyle et al.	1988	Australia	Pinus radiata Plantation	38°S	143°30'E	-38	143.5	10	Top	Temperate	forest	5	15	10	2.8	6.586	0.84706	0.08635	10.895	14.231	85.888	12.4	787	49.58	26.336	24.084	532.377	0.4975	1101	65	300	Field	warmed consecutively	Fertilized	Both
296	Carter et al.	2002	USA	Tyler	30.7°N	90.8°W	30.6	-94.4	10	Top	Subtropical	forest	0	20	10	2.1	5.2635	0.922	0.0845	31.7	7.2	49.6	19.4	1360	51.55	24.85	23.6	207	0.7471	1495	76	548	Field	warmed consecutively	Soda-lime	Both
297	Carter et al.	2002	USA	Tyler	30.7°N	90.8°W	30.6	-94.4	10	Top	Subtropical	forest	0	20	10	1.3	5.2635	0.922	0.0845	31.7	7.2	49.6	19.4	1360	51.55	24.85	23.6	207	0.7471	1495	76	548	Field	warmed consecutively	Soda-lime	Both
298	Cartwright et al.	2015	USA	Stones River National Battlefield			35.8764	-86.4328	1	Top	Temperate	forest	3	31	17	2.01	6.1809	0.94619	0.10026	10.735	10.504	75.144	14.4333	1366	51.272	25.41	23.318	297.14	0.5904	1282	71	480	Field	warmed consecutively	None	Both
299	Castillo-Monroy et al.	2011	Spain	Aranjuez Experimental Station	40°02'N	3°37'W	40.03	-3.62	2	Top	Subtropical	grassland	0	12	6	4.11	6.8079	0.83506	0.08864	10.82	16.89	87.618	13.8	388	42.113	28.665	29.222	297.14	0.3517	1168	61	1335	Field	warmed consecutively	None	Both
300	Castillo-Monroy et al.	2011	Spain	Aranjuez Experimental Station	40°02'N	3°37'W	40.03	-3.62	2	Top	Subtropical	grassland	0	14	7	2.58	6.8079	0.83506	0.08864	10.82	16.89	87.618	13.8	388	42.113	28.665	29.222	297.14	0.3517	1168	61	1335	Field	warmed consecutively	None	Both
301	Castillo-Monroy et al.	2011	Spain	Aranjuez Experimental Station	40°02'N	3°37'W	40.03	-3.62	2	Top	Subtropical	grassland	3	18	10.5	1.74	6.8079	0.83506	0.08864	10.82	16.89	87.618	13.8	388	42.113	28.665	29.222	297.14	0.3517	1168	61	1335	Field	warmed consecutively	None	Both
302	Castillo-Monroy et al.	2011	Spain	Aranjuez Experimental Station	40°02'N	3°37'W	40.03	-3.62	2	Top	Subtropical	grassland	4	18	11	1.65	6.8079	0.83506	0.08864	10.82	16.89	87.618	13.8	388	42.113	28.665	29.222	297.14	0.3517	1168	61	1335	Field	warmed consecutively	None	Both
303	Castillo-Monroy et al.	2011	Spain	Aranjuez Experimental Station	40°02'N	3°37'W	40.03	-3.62	2	Top	Subtropical	grassland	4	18	11	1.8	6.8079	0.83506	0.08864	10.82	16.89	87.618	13.8	388	42.113	28.665	29.222	297.14	0.3517	1168	61	1335	Field	warmed consecutively	None	Both
304	Castillo-Monroy et al.	2011	Spain	Aranjuez Experimental Station	40°02'N	3°37'W	40.03	-3.62	2	Top	Subtropical	grassland	4	26	15	1.51	6.8079	0.83506	0.08864	10.82	16.89	87.618	13.8	388	42.113	28.665	29.222	297.14	0.3517	1168	61	1335	Field	warmed consecutively	None	Both
305	Cater et al.	2012	Slovenia	Kladje			46.48	15.39	10	Top	Temperate	forest	0	10	5	2.316	5.3451	1.42663	0.12936	12.158	11.409	42.176	9.2	1066	47.38	22.427	30.193	272.379	0.6903	656	78	240	Field	warmed consecutively	None	Both
306	Cater et al.	2012	Slovenia	Bricka			46.478	15.261	10	Top	Temperate	forest	0	10	5	3.421	5.3451	1.42663	0.12936	12.158	11.409	42.176	9.1	1190	47.38	22.427	30.193	272.379	0.6613	687	78	240	Field	warmed consecutively	None	Both
307	Cater et al.	2012	Slovenia	Bricka			46.478	15.261	10	Top	Temperate	forest	0	10	5	2.509	5.3451	1.42663	0.12936	12.158	11.409	42.176	9.1	1190	47.38	22.427	30.193	272.379	0.6613	687	78	240	Field	warmed consecutively	None	Both
308	Cater et al.	2012	Slovenia	Snezna jama			45.654	15.028	10	Top	Temperate	forest	0	10	5	2.612	6.4611	1.06484	0.11243	10.385	12.989	83.635	8.3	1330	45.523	27.398	27.079	272.379	0.7358	750	80	240	Field	warmed consecutively	None	Both
309	Cater et al.	2012	Slovenia	Snezna jama			45.654	15.028	10	Top	Temperate	forest	0	10	5	1.994	6.4611	1.06484	0.11243	10.385	12.989	83.635	8.3	1330	45.523	27.398	27.079	272.379	0.7358	750	80	240	Field	warmed consecutively	None	Both
310	Cater et al.	2012	Slovenia	Rajhenav			45.66	15.06	10	Top	Temperate	forest	0	10	5	3.387	6.4611	1.06484	0.11243	10.385	12.989	83.635	8.3	1330	45.523	27.398	27.079	272.379	0.7204	786	80	240	Field	warmed consecutively	None	Both
311	Cater et al.	2012	Slovenia	Vrhovo			45.807	15.303	10	Top	Temperate	forest	0	10	5	1.6	6.4611	1.06484	0.11243	10.385	12.989	83.635	9.4	1138	45.523	27.398	27.079	272.379	0.5837	888	78	240	Field	warmed consecutively	None	Both
312	Ceccon et al.	2011	Italy	Experimental Station of the Faculty of agriculture of the University of Bologna	44°33'N	11°21'E	44.55	11.35	0	Top	Temperate	forest	9	28	18.5	2.46	7.3	1.2	0.13	10.91	14.026	88.932	13.87	672	44.447	24.883	30.67	321.889	0.5019	1002	76	5	Field	parallel independent samples	None	Both
313	Chae et al.	2011	South Korea	Gwangneung forest	37°45'25.37''N	127°9'11.62''E	37.76	127.15	10	Top	Temperate	forest	0	20	10	4.06	5.555	0.99025	0.09075	10.9	8.475	59.225	11.5	1436	51.625	24.975	23.4	312	0.4204	993	71	365	Field	warmed consecutively	None	Both
314	Chae et al.	2011	South Korea	Gwangneung forest	37°45'25.37''N	127°9'11.62''E	37.76	127.15	10	Top	Temperate	forest	0	20	10	3.67	5.555	0.99025	0.09075	10.9	8.475	59.225	11.5	1436	51.625	24.975	23.4	312	0.4204	993	71	365	Field	warmed consecutively	None	Both
315	Chae et al.	2011	South Korea	Gwangneung forest	37°45'25.37''N	127°9'11.62''E	37.76	127.15	10	Top	Temperate	forest	0	20	10	3.32	5.555	0.99025	0.09075	10.9	8.475	59.225	11.5	1436	51.625	24.975	23.4	312	0.4204	993	71	365	Field	warmed consecutively	None	Both
316	Chang et al.	2007	China	Neixiang County	33°20'N- 33°36'N	111°47'E-112°04'E	33.2254	111.86	5	Top	Subtropical	forest	0	20	10	2.3	4.36	5.53	0.23	9.255	9.308	51.485	15.1	900	36.089	20.652	21.959	321.889	0.528	1198	65	331	Field	warmed consecutively	Roots removed	Heterotrophic
317	Chang et al.	2007	China	Neixiang County	33°20'N- 33°36'N	111°47'E-112°04'E	33.2254	111.86	5	Top	Subtropical	forest	0	20	10	2.11	4.36	5.53	0.23	9.255	9.308	51.485	15.1	900	36.089	20.652	21.959	321.889	0.528	1198	65	331	Field	warmed consecutively	Roots removed	Heterotrophic
318	Chang et al.	2007	China	Neixiang County	33°20'N- 33°36'N	111°47'E-112°04'E	33.2254	111.86	5	Top	Subtropical	forest	0	20	10	2.55	4.36	5.53	0.23	9.255	9.308	51.485	15.1	900	36.089	20.652	21.959	321.889	0.528	1198	65	331	Field	warmed consecutively	Roots removed	Heterotrophic
319	Chang et al.	2007	China	Neixiang County	33°20'N- 33°36'N	111°47'E-112°04'E	33.2254	111.86	5	Top	Subtropical	forest	0	20	10	2.09	4.1	5.08	0.3	9.255	9.308	51.485	15.1	900	36.089	20.652	21.959	321.889	0.528	1198	65	331	Field	warmed consecutively	Roots removed	Heterotrophic
320	Chang et al.	2007	China	Neixiang County	33°20'N- 33°36'N	111°47'E-112°04'E	33.2254	111.86	5	Top	Subtropical	forest	0	20	10	2.82	4.1	5.08	0.3	9.255	9.308	51.485	15.1	900	36.089	20.652	21.959	321.889	0.528	1198	65	331	Field	warmed consecutively	Roots removed	Heterotrophic
321	Chang et al.	2007	China	Neixiang County	33°20'N- 33°36'N	111°47'E-112°04'E	33.2254	111.86	5	Top	Subtropical	forest	0	20	10	2.44	4.1	5.08	0.3	9.255	9.308	51.485	15.1	900	36.089	20.652	21.959	321.889	0.528	1198	65	331	Field	warmed consecutively	Roots removed	Heterotrophic
322	Chang et al.	2007	China	Neixiang County	33°20'N- 33°36'N	111°47'E-112°04'E	33.2254	111.86	5	Top	Subtropical	forest	0	20	10	2.39	4.65	3.55	0.26	9.255	9.308	51.485	15.1	900	36.089	20.652	21.959	321.889	0.528	1198	65	331	Field	warmed consecutively	Roots removed	Heterotrophic
323	Chang et al.	2007	China	Neixiang County	33°20'N- 33°36'N	111°47'E-112°04'E	33.2254	111.86	5	Top	Subtropical	forest	0	20	10	2.61	4.65	3.55	0.26	9.255	9.308	51.485	15.1	900	36.089	20.652	21.959	321.889	0.528	1198	65	331	Field	warmed consecutively	Roots removed	Heterotrophic
324	Chang et al.	2007	China	Neixiang County	33°20'N- 33°36'N	111°47'E-112°04'E	33.2254	111.86	5	Top	Subtropical	forest	0	20	10	2.24	4.65	3.55	0.26	9.255	9.308	51.485	15.1	900	36.089	20.652	21.959	321.889	0.528	1198	65	331	Field	warmed consecutively	Roots removed	Heterotrophic
325	Chang et al.	2007	China	Neixiang County	33°20'N- 33°36'N	111°47'E-112°04'E	33.2254	111.86	5	Top	Subtropical	forest	0	20	10	2.35	4.33	3.44	0.22	9.255	9.308	51.485	15.1	900	36.089	20.652	21.959	321.889	0.528	1198	65	331	Field	warmed consecutively	Roots removed	Heterotrophic
326	Chang et al.	2007	China	Neixiang County	33°20'N- 33°36'N	111°47'E-112°04'E	33.2254	111.86	5	Top	Subtropical	forest	0	20	10	2.44	4.33	3.44	0.22	9.255	9.308	51.485	15.1	900	36.089	20.652	21.959	321.889	0.528	1198	65	331	Field	warmed consecutively	Roots removed	Heterotrophic
327	Chang et al.	2007	China	Neixiang County	33°20'N- 33°36'N	111°47'E-112°04'E	33.2254	111.86	5	Top	Subtropical	forest	0	20	10	2.49	4.33	3.44	0.22	9.255	9.308	51.485	15.1	900	36.089	20.652	21.959	321.889	0.528	1198	65	331	Field	warmed consecutively	Roots removed	Heterotrophic
328	Chang et al.	2007	China	Neixiang County	33°20'N- 33°36'N	111°47'E-112°04'E	33.2254	111.86	5	Top	Subtropical	forest	0	20	10	2.32	4.2	3.31	0.22	9.255	9.308	51.485	15.1	900	36.089	20.652	21.959	321.889	0.528	1198	65	331	Field	warmed consecutively	Roots removed	Heterotrophic
329	Chang et al.	2007	China	Neixiang County	33°20'N- 33°36'N	111°47'E-112°04'E	33.2254	111.86	5	Top	Subtropical	forest	0	20	10	2.57	4.2	3.31	0.22	9.255	9.308	51.485	15.1	900	36.089	20.652	21.959	321.889	0.528	1198	65	331	Field	warmed consecutively	Roots removed	Heterotrophic
330	Chang et al.	2007	China	Neixiang County	33°20'N- 33°36'N	111°47'E-112°04'E	33.2254	111.86	5	Top	Subtropical	forest	0	20	10	2.18	4.2	3.31	0.22	9.255	9.308	51.485	15.1	900	36.089	20.652	21.959	321.889	0.528	1198	65	331	Field	warmed consecutively	Roots removed	Heterotrophic
331	Chang et al.	2009	China	Xishui Forest Farm			38	99	10	Top	Temperate	grassland	10	20	15	3.44	5.4168	1.32796	0.12111	8.503	16.062	72.708	0.81	435	26.765	22.942	27.593	297.14	0.157	459	2	6	Field	parallel independent samples	None	Both
332	Chang et al.	2009	China	Xishui Forest Farm			38	99	10	Top	Temperate	grassland	10	20	15	3.44	5.4168	1.32796	0.12111	8.503	16.062	72.708	0.5	435	26.765	22.942	27.593	297.14	0.157	459	2	6	Field	parallel independent samples	None	Both
333	Chang et al.	2009	China	Xishui Forest Farm			38	99	10	Top	Temperate	grassland	10	20	15	3.44	5.4168	1.32796	0.12111	8.503	16.062	72.708	0.3	435	26.765	22.942	27.593	297.14	0.157	459	2	6	Field	parallel independent samples	None	Both
334	Chang et al.	2009	China	Xishui Forest Farm			38	99	10	Top	Temperate	grassland	10	20	15	3.44	5.4168	1.32796	0.12111	8.503	16.062	72.708	-0.2	435	26.765	22.942	27.593	297.14	0.157	459	2	6	Field	parallel independent samples	None	Both
335	Chang et al.	2009	China	Xishui Forest Farm			38	99	10	Top	Temperate	grassland	10	20	15	3.44	5.4168	1.32796	0.12111	8.503	16.062	72.708	-0.4	435	26.765	22.942	27.593	297.14	0.157	459	2	6	Field	parallel independent samples	None	Both
336	Chang et al.	2009	China	Xishui Forest Farm			38	99	10	Top	Temperate	grassland	10	20	15	3.44	5.4168	1.32796	0.12111	8.503	16.062	72.708	-0.4	435	26.765	22.942	27.593	297.14	0.157	459	2	6	Field	parallel independent samples	None	Both
337	Chang et al.	2013	China	Xishui forest Farm			30.5999	115.299	5	Top	Temperate	grassland	-20	15	-2.5	3.146	7.83	0.88237	0.08375	10.489	16.239	89.508	0.5	435	40.577	27.344	32.079	503.847	0.5306	1138	74	12	Field	parallel independent samples	None	Both
338	Chang et al.	2013	China	Xishui forest Farm			30.5999	115.299	5	Top	Temperate	grassland	-20	15	-2.5	2.932	7.83	0.88237	0.08375	10.489	16.239	89.508	0.5	435	40.577	27.344	32.079	503.847	0.5306	1138	74	12	Field	parallel independent samples	None	Both
339	Chang et al.	2013	China	Xishui forest Farm			30.5999	115.299	5	Top	Temperate	grassland	-20	15	-2.5	2.59	7.725	0.88237	0.08375	10.489	16.239	89.508	0.5	435	40.577	27.344	32.079	503.847	0.5306	1138	74	12	Field	parallel independent samples	None	Both
340	Chang et al.	2013	China	Xishui forest Farm			30.5999	115.299	5	Top	Temperate	grassland	-20	15	-2.5	2.274	7.538	0.88237	0.08375	10.489	16.239	89.508	0.5	435	40.577	27.344	32.079	503.847	0.5306	1138	74	12	Field	parallel independent samples	None	Both
341	Chang et al.	2013	China	Xishui forest Farm			30.5999	115.299	5	Top	Temperate	grassland	-20	15	-2.5	2.104	7.471	0.88237	0.08375	10.489	16.239	89.508	0.5	435	40.577	27.344	32.079	503.847	0.5306	1138	74	12	Field	parallel independent samples	None	Both
342	Chang et al.	2013	China	Xishui forest Farm			30.5999	115.299	5	Top	Temperate	grassland	-20	15	-2.5	1.988	7.106	0.88237	0.08375	10.489	16.239	89.508	0.5	435	40.577	27.344	32.079	503.847	0.5306	1138	74	12	Field	parallel independent samples	None	Both
343	Chang et al. (a)	2005	China	Qilian Mountain	38°32'N	100°15'E	38.5333	100.25	2	Top	Temperate	grassland	0	10	5	3.8	6.0303	0.75184	0.07732	7.801	11.808	77.575	0.5	435	34.754	19.161	24.385	363.889	0.3561	762	5	6	Field	warmed consecutively	None	Both
344	Chang et al. (a)	2005	China	Qilian Mountain	38°32'N	100°15'E	38.5333	100.25	2	Top	Temperate	forest	-1	10	4.5	2.6	6.0303	0.75184	0.07732	7.801	11.808	77.575	0.5	435	34.754	19.161	24.385	363.889	0.3561	762	5	6	Field	warmed consecutively	None	Both
345	Chang et al. (a)	2005	China	Qilian Mountain	38°32'N	100°15'E	38.5333	100.25	2	Top	Temperate	grassland	15	31	23	2.5	6.0303	0.75184	0.07732	7.801	11.808	77.575	0.5	435	34.754	19.161	24.385	363.889	0.3561	762	5	6	Field	warmed consecutively	None	Both
346	Chang et al. (a)	2005	China	Qilian Mountain	38°32'N	100°15'E	38.5333	100.25	2	Top	Temperate	grassland	-3	17	7	2.2	6.0303	0.75184	0.07732	7.801	11.808	77.575	0.5	435	34.754	19.161	24.385	363.889	0.3561	762	5	6	Field	warmed consecutively	None	Both
347	Chang et al. (a)	2005	China	Qilian Mountain	38°32'N	100°15'E	38.5333	100.25	2	Top	Temperate	grassland	8	18	13	3	6.0303	0.75184	0.07732	7.801	11.808	77.575	0.5	435	34.754	19.161	24.385	363.889	0.3561	762	5	6	Field	warmed consecutively	None	Both
348	Chang et al. (b)	2005	China	Qilian Mountain	38°32'N	100°15'E	38.5333	100.25	15	Top	Temperate	grassland	-2	16	7	3	6.0303	0.75184	0.07732	7.801	11.808	77.575	0.5	435	34.754	19.161	24.385	363.889	0.3561	762	5	270	Field	warmed consecutively	Roots removed	Heterotrophic
349	Chang et al. (c)	2005	China	Sunan	38°24'N	100°17'E	38.4	100.283	15	Top	Temperate	grassland	-2.5	15	6.25	2.16	4.5002	0.98201	0.09295	7.064	11.734	55.833	0.5	435	25.297	18.221	20.782	503.847	0.0895	486	6	150	Field	warmed consecutively	Vegetation removed	Heterotrophic
350	Chapman and Thurlow	1998	Scotland	Gilensaugh	56°55'		56.9167	-3	0 to 20	Top	Boreal	wetland	1	13	7	3.9	5.2726	4.14646	0.23434	14.247	17.464	50.565	6.25	1059	53.071	18.189	25.94	307.697	0.6345	536	85	96	Lab	parallel independent samples	Vegetation removed	Heterotrophic
351	Chapman and Thurlow	1998	Scotland	Gilensaugh	56°55'		56.9167	-3	0 to 20	Top	Boreal	wetland	1	13	7	2.9	5.2726	4.14646	0.23434	14.247	17.464	50.565	6.25	1059	53.071	18.189	25.94	307.697	0.6345	536	85	96	Lab	parallel independent samples	Vegetation removed	Heterotrophic
352	Chapman and Thurlow	1998	Scotland	Tonburn Moss	57°20'		57.3333	-3	0 to 20	Top	Boreal	wetland	1	20	10.5	3.3	5.3807	2.91534	0.1848	13.95	14.001	48.856	6.88	919	56.283	18.571	25.146	378.703	0.6522	531	84	96	Lab	parallel independent samples	Vegetation removed	Heterotrophic
353	Chapman and Thurlow	1998	Scotland	Gilensaugh	56°55'		56.9167	-3	0 to 20	Top	Boreal	wetland	5	30	17.5	2.1	5.2726	4.14646	0.23434	14.247	17.464	50.565	6.25	1059	53.071	18.189	25.94	307.697	0.6345	536	85	96	Lab	parallel independent samples	Vegetation removed	Heterotrophic
354	Chapman and Thurlow	1998	Scotland	Gilensaugh	56°55'		56.9167	-3	0 to 20	Top	Boreal	wetland	5	30	17.5	2.3	5.2726	4.14646	0.23434	14.247	17.464	50.565	6.25	1059	53.071	18.189	25.94	307.697	0.6345	536	85	96	Lab	parallel independent samples	Vegetation removed	Heterotrophic
355	Chapman and Thurlow	1998	Scotland	Loch Ard	56°07'		56.1856	-4.47454	0 to 20	Top	Temperate	wetland	1	13	7	2.5	5.2376	7.20565	0.3713	16.1	23.761	47.923	8.23	1528	55.543	19.044	25.413	363.889	0.6454	574	87	177	Lab	parallel independent samples	Vegetation removed	Heterotrophic
356	Chapman and Thurlow	1998	Scotland	Loch Ard	56°07'		56.1856	-4.47454	0 to 20	Top	Temperate	wetland	1	13	7	2.7	5.2376	7.20565	0.3713	16.1	23.761	47.923	8.23	1528	55.543	19.044	25.413	363.889	0.6454	574	87	177	Lab	parallel independent samples	Vegetation removed	Heterotrophic
357	Chapman and Thurlow	1998	Scotland	Loch Ard	56°07'		56.1856	-4.47454	0 to 20	Top	Temperate	wetland	5	30	17.5	1.9	5.2376	7.20565	0.3713	16.1	23.761	47.923	8.23	1528	55.543	19.044	25.413	363.889	0.6454	574	87	177	Lab	parallel independent samples	Vegetation removed	Heterotrophic
358	Chapman and Thurlow	1998	Scotland	Loch Ard	56°07'		56.1856	-4.47454	0 to 20	Top	Temperate	wetland	5	30	17.5	2.5	5.2376	7.20565	0.3713	16.1	23.761	47.923	8.23	1528	55.543	19.044	25.413	363.889	0.6454	574	87	177	Lab	parallel independent samples	Vegetation removed	Heterotrophic
359	Chapman et al.	1979	United Kingdom	Studland			50.72	-1.92	3	Top	Temperate	grassland	0	20	10	2.53	3.6383	1.99806	0.12652	9.02	9.815	37.61	10.7	800	37.529	11.53	15.541	272.379	0.5613	704	85	365	Field	warmed consecutively	None	Both
360	Chapman et al.	1979	United Kingdom	Studland			50.72	-1.92	3	Top	Temperate	grassland	0	20	10	2.35	3.6383	1.99806	0.12652	9.02	9.815	37.61	10.7	800	37.529	11.53	15.541	272.379	0.5613	704	85	365	Field	warmed consecutively	None	Both
361	Chapman et al.	1979	United Kingdom	Studland			50.72	-1.92	3	Top	Temperate	grassland	0	20	10	2.46	3.6383	1.99806	0.12652	9.02	9.815	37.61	10.7	800	37.529	11.53	15.541	272.379	0.5613	704	85	365	Field	warmed consecutively	None	Both
362	Chapman et al.	1979	United Kingdom	Decoy Heath			50.72	-1.92	3	Top	Temperate	forest	0	20	10	2.12	3.6383	1.99806	0.12652	9.02	9.815	37.61	10.7	800	37.529	11.53	15.541	272.379	0.5613	704	85	365	Field	warmed consecutively	None	Both
363	Chapman et al.	1979	United Kingdom	Wareham Forest			50.72	-1.92	3	Top	Temperate	forest	0	20	10	2.09	3.6383	1.99806	0.12652	9.02	9.815	37.61	10.7	800	37.529	11.53	15.541	272.379	0.5613	704	85	365	Field	warmed consecutively	None	Both
364	Chapman et al.	1979	United Kingdom	Hartland Moor			50.72	-1.92	3	Top	Temperate	grassland	0	20	10	2.44	3.6383	1.99806	0.12652	9.02	9.815	37.61	10.7	800	37.529	11.53	15.541	272.379	0.5613	704	85	365	Field	warmed consecutively	None	Both
365	Chapman et al.	1979	United Kingdom	Hartland Moor			50.72	-1.92	3	Top	Temperate	forest	0	20	10	2.2	3.6383	1.99806	0.12652	9.02	9.815	37.61	10.7	800	37.529	11.53	15.541	272.379	0.5613	704	85	365	Field	warmed consecutively	None	Both
366	Chapman et al.	1979	United Kingdom	Decoy Heath			50.72	-1.92	3	Top	Temperate	forest	0	20	10	2.57	3.6383	1.99806	0.12652	9.02	9.815	37.61	10.7	800	37.529	11.53	15.541	272.379	0.5613	704	85	365	Field	warmed consecutively	None	Both
367	Chapman et al.	1979	United Kingdom	Decoy Heath			50.72	-1.92	3	Top	Temperate	grassland	0	20	10	2.68	3.6383	1.99806	0.12652	9.02	9.815	37.61	10.7	800	37.529	11.53	15.541	272.379	0.5613	704	85	365	Field	warmed consecutively	None	Both
368	Chatterjee et al	2011	USA	Palm Springs	33°32?51.9?N	116°30?17.8?W	33.5394	-116.505	0 to 15	Top	Subtropical	grassland	13	31	22	2.11	7.4448	0.69089	0.08137	10.793	11.544	94.634	21	840	52.677	21.4	25.923	321.889	0.3781	1279	54	6	Lab	parallel independent samples	Wetting	Both
369	Chatterjee et al	2011	USA	Palm Springs	33°34?55? N	116°22?16?W	33.5819	-116.371	0 to 15	Top	Subtropical	grassland	13	31	22	2.09	7.8488	0.50007	0.05483	11.772	9.566	98.939	24	150	57.266	18.911	23.823	297.14	0.1895	1358	52	6	Lab	parallel independent samples	Wetting	Both
370	Chatterjee et al	2011	USA	Palm Springs	33°31?16.4?N	116°25?11.1?W	33.5212	-116.42	0 to 15	Top	Subtropical	forest	13	31	22	1.86	7.8488	0.50007	0.05483	11.772	9.566	98.939	15	132	57.266	18.911	23.823	297.14	0.4577	1040	52	6	Lab	parallel independent samples	Wetting	Both
371	Chen et al.	2002	Australia	Howard Springs	12°30'S	130°45'E	-12.5	130.72	2.5	Top	Tropical	forest	20	30	25	2.17	4.9424	0.64184	0.0603	9.91	6.743	59.136	27.5083	1733	47.675	15.137	16.788	545.812	0.547	1694	66	970	Field	parallel independent samples	None	Both
372	Chen et al.	2004	China	Xilingol	43°48'17''N	116°34'25''E	43	116	0	Top	Temperate	grassland	-5	25	10	1.78	7.2754	1.27793	0.14142	9.845	22.129	98.622	0.3	388	34.855	27.797	37.348	297.14	0.2651	815	40	270	Field	parallel independent samples	None	Both
373	Chen et al.	2004	China	Xilingol	43°49'52''N	116°31'01''E	43	116	0	Top	Temperate	grassland	-5	25	10	1.66	7.2754	1.27793	0.14142	9.845	22.129	98.622	0.3	388	34.855	27.797	37.348	297.14	0.2651	815	40	270	Field	parallel independent samples	None	Both
374	Chen et al.	2004	China	Xilingol	43°54'48''N	116°18'36''E	43	116	0	Top	Temperate	grassland	-5	25	10	1.63	7.2754	1.27793	0.14142	9.845	22.129	98.622	0.3	388	34.855	27.797	37.348	297.14	0.2651	815	40	270	Field	parallel independent samples	None	Both
375	Chen et al.	2004	China	Xilingol	43°37'05''N	116°41'15''E	43	116	0	Top	Temperate	grassland	-5	25	10	1.47	7.2754	1.27793	0.14142	9.845	22.129	98.622	0.3	388	34.855	27.797	37.348	297.14	0.2651	815	40	270	Field	parallel independent samples	None	Both
376	Chen et al.	2004	China	Xilingol	43°37'37''N	116°41'14''E	43	116	0	Top	Temperate	grassland	-5	25	10	1.75	7.2754	1.27793	0.14142	9.845	22.129	98.622	0.3	388	34.855	27.797	37.348	297.14	0.2651	815	40	270	Field	parallel independent samples	None	Both
377	Chen et al.	2004	China	Xilingol	43°30'53''N	116°49'04''E	43	116	0	Top	Temperate	grassland	-5	25	10	1.84	7.2754	1.27793	0.14142	9.845	22.129	98.622	0.3	388	34.855	27.797	37.348	297.14	0.2651	815	40	270	Field	parallel independent samples	None	Both
378	Chen et al.	2004	China	Xilingol	43°54'54''N	116°06'34''E	43	116	0	Top	Temperate	grassland	-5	25	10	1.52	7.2754	1.27793	0.14142	9.845	22.129	98.622	0.3	388	34.855	27.797	37.348	297.14	0.2651	815	40	270	Field	parallel independent samples	None	Both
379	Chen et al.	2004	China	Xilingol	43°56'12''N	115°47'38''E	43	116	0	Top	Temperate	grassland	-5	25	10	1.69	7.2754	1.27793	0.14142	9.845	22.129	98.622	0.3	388	34.855	27.797	37.348	297.14	0.2651	815	40	270	Field	parallel independent samples	None	Both
380	Chen et al.	2004	China	Xilingol	43°56'04''N	115°29'16''E	43	116	0	Top	Temperate	grassland	-5	25	10	1.62	7.2754	1.27793	0.14142	9.845	22.129	98.622	0.3	388	34.855	27.797	37.348	297.14	0.2651	815	40	270	Field	parallel independent samples	None	Both
381	Chen et al.	2004	China	Xilingol	43°57'28''N	115°11'27''E	43	116	0	Top	Temperate	grassland	-5	25	10	1.62	7.2754	1.27793	0.14142	9.845	22.129	98.622	0.3	388	34.855	27.797	37.348	297.14	0.2651	815	40	270	Field	parallel independent samples	None	Both
382	Chen et al.	2004	China	Xilingol	43°30'38''N	116°49'29''E	43	116	0	Top	Temperate	grassland	-5	25	10	1.53	7.2754	1.27793	0.14142	9.845	22.129	98.622	0.3	388	34.855	27.797	37.348	297.14	0.2651	815	40	270	Field	parallel independent samples	None	Both
383	Chen et al.	2007	China	Li County	31°47'N	102°42'E	31.7833	102.7	0	Top	Subtropical	forest	6	22	14	2.36	4.7307	1.11962	0.09915	9.095	10.061	49.737	9	850	35.929	19.514	21.457	321.889	0.2825	886	25	150	Field	parallel independent samples	None	Both
384	Chen et al.	2013	China	Beijing Olympic forest Park			40.0167	116.383	5	Top	Temperate	forest	0	30	15	2.3	6.9663	1.15984	0.11665	10.667	15	93.665	10	600	42.669	27.663	29.668	545.812	0.2714	1062	59	277	Field	warmed consecutively	Vegetation removed	Both
385	Chen et al.	2013	China	Beijing Olympic forest Park			40.0167	116.383	5	Top	Temperate	forest	0	30	15	1.209	6.9663	1.15984	0.11665	10.667	15	93.665	10	600	42.669	27.663	29.668	545.812	0.2714	1092	59	277	Field	warmed consecutively	Vegetation removed	Both
386	Chen et al.	2015	China	Longwang Mountain			32.2	118.72	3	Top	Subtropical	forest	3	30	16.5	2.907	6.6	6.03	1.87	32.3	13.384	77.992	15.6	1100	40.961	25.693	27.746	321.889	0.473	1094	75	1095	Field	warmed consecutively	None	Both
387	Chen et al.	2015	China	Longwang Mountain			32.2	118.72	3	Top	Subtropical	forest	3	30	16.5	2.795	6.68	6.48	1.91	34	13.384	77.992	15.6	1100	40.961	25.693	27.746	321.889	0.473	1094	75	1095	Field	warmed consecutively	None	Both
388	Chen et al.	2015	China	Longwang Mountain			32.2	118.72	3	Top	Subtropical	forest	3	30	16.5	2.762	6.68	6.55	1.91	34.4	13.384	77.992	15.6	1100	40.961	25.693	27.746	321.889	0.473	1094	75	1095	Field	warmed consecutively	None	Both
389	Chen et al.	2015	China	Longwang Mountain			32.2	118.72	3	Top	Subtropical	forest	3	30	16.5	2.68	6.8	6.23	1.9	32.9	13.384	77.992	15.6	1100	40.961	25.693	27.746	321.889	0.473	1094	75	1095	Field	warmed consecutively	None	Both
390	Chen et al.	2010	China	Wuyi Mountain	27°30'N	117°35'E	27.5	117.583	0 to 20	Top	Subtropical	forest	10	30	20	2.93	7.9	0.467	0.064	10.944	9.668	70.772	16.82	1890	52.784	24.17	23.046	351	0.7588	1103	77	23	Lab	warmed consecutively	Wetting	Both
391	Chen et al.	2010	China	Baekdu mountain Forest Ecosystem Research Station	42°24'N	128°28'E	42.4	128.467	0 to 20	Top	Temperate	forest	10	30	20	2	5.5	7.7	0.294	10.972	12.308	94.336	3.13	655	49.856	23.724	26.42	940.01	0.5048	810	56	23	Lab	warmed consecutively	Wetting	Both
392	Chen et al.	2010	China	Gahai-Zecha National Nature Reserve	34°15'N	102°21'E	34.25	102.35	0 to 20	Top	Temperate	grassland	10	30	20	2.22	6.3	0.991	0.582	7.92	11.55	40.92	0.41	646	28.71	18.15	19.14	297.14	0.3555	801	13	23	Lab	warmed consecutively	Wetting	Both
393	Chen et al.	2010	China	Agro-Ecological Experiment Station	35°12'N	107°40'E	35.2	107.667	0 to 20	Top	Temperate	agriculture	10	30	20	2.37	7.9	0.467	0.064	10	18.1	100	9.82	590	39.2	26.5	34.3	111.966	0.4275	1049	60	23	Lab	warmed consecutively	Wetting	Both
394	Chen et al.	2010	China	Xilinguole Steppe	43°17'N	116°08'E	43.2833	116.133	0 to 20	Top	Temperate	grassland	10	30	20	3.55	8.1	0.955	0.127	8.075	16.921	82.656	0.45	315	34.579	19.753	28.968	297.14	0.2316	814	41	23	Lab	warmed consecutively	Wetting	Both
395	Chen et al.	2010	China	Jianfengling National Forest Park	18°40'N	108°49'E	18.6667	108.817	0 to 20	Top	Tropical	forest	10	30	20	3.09	5.5	0.741	0.06	6.251	6.21	43.027	23.49	1329	28.022	13.422	16.756	485.166	0.7632	1331	77	23	Lab	warmed consecutively	Wetting	Both
396	Chen et al. (a)	2003	China	Xilingol	43°30'38''N	116°49'29''E	43	116	0	Top	Temperate	grassland	-5	25	10	1.53	7.2754	1.27793	0.14142	9.845	22.129	98.622	0.3	388	34.855	27.797	37.348	297.14	0.2651	815	40	135	Field	warmed consecutively	None	Both
397	Chen et al. (a)	2003	China	Xilingol	43°30'53''N	116°49'04''E	43	116	0	Top	Temperate	grassland	-5	25	10	1.84	7.2754	1.27793	0.14142	9.845	22.129	98.622	0.3	388	34.855	27.797	37.348	297.14	0.2651	815	40	135	Field	warmed consecutively	None	Both
398	Chen et al. (a)	2003	China	Xilingol	43°54'48''N	116°18'36''E	43	116	0	Top	Temperate	grassland	-5	25	10	1.63	7.2754	1.27793	0.14142	9.845	22.129	98.622	0.3	388	34.855	27.797	37.348	297.14	0.2651	815	40	135	Field	warmed consecutively	None	Both
399	Chen et al. (a)	2003	China	Xilingol	43°54'54''N	116°06'34''E	43	116	0	Top	Temperate	grassland	-5	25	10	1.52	7.2754	1.27793	0.14142	9.845	22.129	98.622	0.3	388	34.855	27.797	37.348	297.14	0.2651	815	40	135	Field	warmed consecutively	None	Both
400	Chen et al. (a)	2003	China	Xilingol	43°56'12''N	115°47'38''E	43	116	0	Top	Temperate	grassland	-5	25	10	1.69	7.2754	1.27793	0.14142	9.845	22.129	98.622	0.3	388	34.855	27.797	37.348	297.14	0.2651	815	40	135	Field	warmed consecutively	None	Both
401	Chen et al. (a)	2003	China	Xilingol	43°56'04''N	115°29'16''E	43	116	0	Top	Temperate	grassland	-5	25	10	1.62	7.2754	1.27793	0.14142	9.845	22.129	98.622	0.3	388	34.855	27.797	37.348	297.14	0.2651	815	40	135	Field	warmed consecutively	None	Both
402	Chen et al. (a)	2003	China	Xilingol	43°57'28''N	115°11'27''E	43	116	0	Top	Temperate	grassland	-5	25	10	1.62	7.2754	1.27793	0.14142	9.845	22.129	98.622	0.3	388	34.855	27.797	37.348	297.14	0.2651	815	40	135	Field	warmed consecutively	None	Both
403	Chen et al. (a)	2003	China	Xilingol	43°48'17''N	116°34'25''E	43	116	0	Top	Temperate	grassland	-5	25	10	1.78	7.2754	1.27793	0.14142	9.845	22.129	98.622	0.3	388	34.855	27.797	37.348	297.14	0.2651	815	40	135	Field	warmed consecutively	None	Both
404	Chen et al. (a)	2003	China	Xilingol	43°37'05''N	116°41'15''E	43	116	0	Top	Temperate	grassland	-5	25	10	1.47	7.2754	1.27793	0.14142	9.845	22.129	98.622	0.3	388	34.855	27.797	37.348	297.14	0.2651	815	40	135	Field	warmed consecutively	None	Both
405	Chen et al. (a)	2003	China	Xilingol	43°49'52''N	116°31'01''E	43	116	0	Top	Temperate	grassland	-5	25	10	1.66	7.2754	1.27793	0.14142	9.845	22.129	98.622	0.3	388	34.855	27.797	37.348	297.14	0.2651	815	40	135	Field	warmed consecutively	None	Both
406	Chen et al. (a)	2003	China	Xilingol	43°37'37''N	116°41'14''E	43	116	0	Top	Temperate	grassland	-5	25	10	1.75	7.2754	1.27793	0.14142	9.845	22.129	98.622	0.3	388	34.855	27.797	37.348	297.14	0.2651	815	40	135	Field	warmed consecutively	None	Both
407	Chen et al. (b)	2003	Australia	Howard Springs	12°28'S	131°08'E	-12.47	131.13	5	Top	Tropical	grassland	20	30	25	2.35	2.2328	0.51627	0.04037	4.75	7.448	23.283	31.5	1700	14.097	16.075	8.428	117	0.5433	1746	66	515	Field	warmed consecutively	None	Both
408	Cheng et al. (b)	2013	China				26.5333	106.767	5	Top	Subtropical	forest	6	23	14.5	2.64	6	3.61	0.29	11.006	10.176	71.52	14.8	1118	51.768	24.371	23.861	207	0.5354	1108	77	360	Field	warmed consecutively	Litter removed	Both
409	Cheng et al. (b)	2013	China				26.5333	106.767	5	Top	Subtropical	forest	6	23	14.5	2.69	6	3.61	0.29	11.006	10.176	71.52	14.8	1118	51.768	24.371	23.861	207	0.5354	1233	77	360	Field	warmed consecutively	None	Both
410	Cheng et al. (a)	2013	China	Hydraulic Technique Popularization Station			31.2	121.12	5	Top	Temperate	agriculture	0	30	15	3.669	6.1	1.009	0.108	9.49	14.333	81.834	17.7	1044.7	41.357	26.769	29.074	321.889	0.4516	1027	78	300	Field	warmed consecutively	None	Both
411	Cheng et al. (a)	2013	China	Hydraulic Technique Popularization Station			31.2	121.12	5	Top	Temperate	agriculture	0	30	15	1.878	6.1	1.009	0.108	9.49	14.333	81.834	17.7	1044.7	41.357	26.769	29.074	321.889	0.4516	1027	78	300	Field	warmed consecutively	None	Both
412	Chou et al.	2008	USA	Sierra Foothills Research and Extension Center	39°18'N	121°17'W	39.25	-121.28	2.5	Top	Subtropical	grassland	5	15	10	1.83	6.1556	1.08501	0.10481	10.85	11.663	72.966	16	750	50.911	24.544	24.545	363.889	0.5033	1342	60	730	Field	warmed consecutively	Irrigation	Both
413	Chu et al.	2006	China	Li County	31°47'N	102°42'E	31.7833	102.7	10	Top	Subtropical	agriculture	5	25	15	1.82	4.7307	1.11962	0.09915	9.095	10.061	49.737	9	850	35.929	19.514	21.457	321.889	0.2825	886	25	154	Field	warmed consecutively	None	Both
414	Chu et al.	2006	China	Li County	31°47'N	102°42'E	31.7833	102.7	10	Top	Subtropical	forest	5	25	15	2.44	4.7307	1.11962	0.09915	9.095	10.061	49.737	9	850	35.929	19.514	21.457	321.889	0.2825	886	25	154	Field	warmed consecutively	None	Both
415	Chu et al.	2006	China	Li County	31°47'N	102°42'E	31.7833	102.7	10	Top	Subtropical	forest	5	25	15	2.73	4.7307	1.11962	0.09915	9.095	10.061	49.737	9	850	35.929	19.514	21.457	321.889	0.2825	886	25	154	Field	warmed consecutively	None	Both
416	Clark et al.	2004	USA	Gainesville	29°44'N	82°9'30''W	29.73	-82.16	5	Top	Subtropical	forest	7	32	19.5	2.1	6.384	0.90575	0.10286	12.67	6.257	70.826	24	1332	62.621	26.174	20.301	189.75	0.7508	1496	75	365	Field	warmed consecutively	None	Both
417	Clark et al.	2004	USA	Gainesville	29°44'N	82°9'30''W	29.73	-82.16	5	Top	Subtropical	forest	7	32	19.5	1.8	6.384	0.90575	0.10286	12.67	6.257	70.826	24	1332	62.621	26.174	20.301	189.75	0.7508	1496	75	365	Field	warmed consecutively	None	Both
418	Clark et al.	2004	USA	Gainesville	29°44'N	82°9'30''W	29.73	-82.16	5	Top	Subtropical	forest	7	32	19.5	1.6	6.384	0.90575	0.10286	12.67	6.257	70.826	24	1332	62.621	26.174	20.301	189.75	0.7508	1496	75	365	Field	warmed consecutively	None	Both
419	Coleman et al.	2000	USA	Harshaw Forestry Research Farm	42°38'N	89°25'E	45.63	-89.42	2	Top	Temperate	forest	0	20	10	2.45	4.6781	3.51144	0.24309	16.11	14.571	23.494	4.9	810	67.204	10.887	21.909	426.041	0.4325	857	78	942	Field	warmed consecutively	None	Both
420	Coleman et al.	2000	USA	Harshaw Forestry Research Farm	42°38'N	89°25'E	45.63	-89.42	2	Top	Temperate	forest	0	20	10	2.2	4.6781	3.51144	0.24309	16.11	14.571	23.494	4.9	810	67.204	10.887	21.909	426.041	0.4325	857	78	942	Field	warmed consecutively	None	Both
421	Conant et al. (b)	2008	USA	Vernon	33°50'N	99°02'W	33.8333	-99.0333		Top	Subtropical	agriculture	25	35	30	1.6	6.6251	1.02	0.11565	9.071	17.117	91.1	5	400	14.6	43.1	42.3	576.718	0.3947	923	67	60	Lab	warmed consecutively	Wetting	Both
422	Conant et al. (b)	2008	USA	Vernon	33°50'N	99°02'W	33.8333	-99.0333		Top	Subtropical	agriculture	25	35	30	1.6	6.6251	1.12	0.11565	9.071	17.117	91.1	5	400	42.471	23.088	34.441	576.718	0.3947	923	67	60	Lab	warmed consecutively	Wetting	Both
423	Conant et al. (b)	2008	USA	Vernon	33°50'N	99°02'W	33.8333	-99.0333		Top	Subtropical	agriculture	15	25	20	2	6.6251	1.02	0.11565	9.071	17.117	91.1	5	400	14.6	43.1	42.3	576.718	0.3947	923	67	150	Lab	warmed consecutively	Wetting	Both
424	Conant et al. (b)	2008	USA	Vernon	33°50'N	99°02'W	33.8333	-99.0333		Top	Subtropical	agriculture	25	35	30	2	6.6251	1.02	0.11565	9.071	17.117	91.1	5	400	14.6	43.1	42.3	576.718	0.3947	923	67	150	Lab	warmed consecutively	Wetting	Both
425	Conant et al. (b)	2008	USA	Vernon	33°50'N	99°02'W	33.8333	-99.0333		Top	Subtropical	grassland	25	35	30	2	6.6251	1.02	0.11565	9.071	17.117	91.1	5	400	14.6	43.1	42.3	576.718	0.3947	923	67	300	Lab	warmed consecutively	Wetting	Both
426	Conant et al. (b)	2008	USA	Vernon	33°50'N	99°02'W	33.8333	-99.0333		Top	Subtropical	grassland	15	25	20	2.2	6.6251	1.12	0.11565	9.071	17.117	91.1	5	400	42.471	23.088	34.441	576.718	0.3947	923	67	150	Lab	warmed consecutively	Wetting	Both
427	Conant et al. (b)	2008	USA	Vernon	33°50'N	99°02'W	33.8333	-99.0333		Top	Subtropical	grassland	25	35	30	2.2	6.6251	1.12	0.11565	9.071	17.117	91.1	5	400	42.471	23.088	34.441	576.718	0.3947	923	67	450	Lab	warmed consecutively	Wetting	Both
428	Conant et al. (b)	2008	USA	Vernon	33°50'N	99°02'W	33.8333	-99.0333		Top	Subtropical	grassland	15	25	20	2.25	6.6251	3.24	0.11565	9.071	17.117	91.1	17	665	10.8	49.5	29.7	297.14	0.3556	1475	61	60	Lab	warmed consecutively	Wetting	Both
429	Conant et al. (b)	2008	USA	Vernon	33°50'N	99°02'W	33.8333	-99.0333		Top	Subtropical	agriculture	25	35	30	2.25	6.6251	2.8	0.11565	9.071	17.117	91.1	17	665	17.2	48.5	34.3	297.14	0.3556	1475	61	150	Lab	warmed consecutively	Wetting	Both
430	Conant et al. (b)	2008	USA	Vernon	33°50'N	99°02'W	33.8333	-99.0333		Top	Subtropical	agriculture	25	35	30	2.25	6.6251	3.24	0.11565	9.071	17.117	91.1	17	665	10.8	49.5	29.7	297.14	0.3556	1475	61	60	Lab	warmed consecutively	Wetting	Both
431	Conant et al. (b)	2008	USA	Vernon	33°50'N	99°02'W	33.8333	-99.0333		Top	Subtropical	agriculture	15	25	20	2.5	6.6251	2.8	0.11565	9.071	17.117	91.1	17	665	17.2	48.5	34.3	297.14	0.3556	1475	61	150	Lab	warmed consecutively	Wetting	Both
432	Conant et al. (b)	2008	USA	Vernon	33°50'N	99°02'W	33.8333	-99.0333		Top	Subtropical	agriculture	15	25	20	2.5	6.6251	1.02	0.11565	9.071	17.117	91.1	5	400	14.6	43.1	42.3	576.718	0.3947	923	67	450	Lab	warmed consecutively	Wetting	Both
433	Conant et al. (b)	2008	USA	Vernon	33°50'N	99°02'W	33.8333	-99.0333		Top	Subtropical	grassland	15	25	20	2.6	6.6251	1.02	0.11565	9.071	17.117	91.1	5	400	14.6	43.1	42.3	576.718	0.3947	923	67	300	Lab	warmed consecutively	Wetting	Both
434	Conant et al. (b)	2008	USA	Vernon	33°50'N	99°02'W	33.8333	-99.0333		Top	Subtropical	grassland	15	25	20	2.6	6.6251	1.12	0.11565	9.071	17.117	91.1	5	400	42.471	23.088	34.441	576.718	0.3947	923	67	150	Lab	warmed consecutively	Wetting	Both
435	Conant et al. (b)	2008	USA	Vernon	33°50'N	99°02'W	33.8333	-99.0333		Top	Subtropical	grassland	4	15	9.5	2.6	6.6251	1.12	0.11565	9.071	17.117	91.1	5	400	42.471	23.088	34.441	576.718	0.3947	923	67	60	Lab	warmed consecutively	Wetting	Both
436	Conant et al. (b)	2008	USA	Vernon	33°50'N	99°02'W	33.8333	-99.0333		Top	Subtropical	grassland	15	25	20	2.75	6.6251	3.24	0.11565	9.071	17.117	91.1	17	665	10.8	49.5	29.7	297.14	0.3556	1475	61	150	Lab	warmed consecutively	Wetting	Both
437	Conant et al. (b)	2008	USA	Vernon	33°50'N	99°02'W	33.8333	-99.0333		Top	Subtropical	agriculture	4	15	9.5	2.75	6.6251	3.24	0.11565	9.071	17.117	91.1	17	665	10.8	49.5	29.7	297.14	0.3556	1475	61	60	Lab	warmed consecutively	Wetting	Both
438	Conant et al. (b)	2008	USA	Vernon	33°50'N	99°02'W	33.8333	-99.0333		Top	Subtropical	grassland	25	35	30	2.8	6.6251	1.02	0.11565	9.071	17.117	91.1	5	400	14.6	43.1	42.3	576.718	0.3947	923	67	450	Lab	warmed consecutively	Wetting	Both
439	Conant et al. (b)	2008	USA	Mandan	46.767N	100.917W	46.767	-100.917		Top	Temperate	agriculture	25	35	30	2.8	7.5567	1.12	0.12005	9.803	18.295	98.117	5	400	42.471	23.088	34.441	576.718	0.3947	923	67	300	Lab	warmed consecutively	Wetting	Both
440	Conant et al. (b)	2008	USA	Mandan	46.767N	100.917W	46.767	-100.917		Top	Temperate	agriculture	15	25	20	3	7.5567	3.24	0.12005	9.803	18.295	98.117	17	665	10.8	49.5	29.7	297.14	0.3556	1475	61	150	Lab	warmed consecutively	Wetting	Both
441	Conant et al. (b)	2008	USA	Mandan	46.767N	100.917W	46.767	-100.917		Top	Temperate	grassland	4	15	9.5	3	7.5567	2.8	0.12005	9.803	18.295	98.117	17	665	17.2	48.5	34.3	297.14	0.3556	1475	61	300	Lab	warmed consecutively	Wetting	Both
442	Conant et al. (b)	2008	USA	Mandan	46.767N	100.917W	46.767	-100.917		Top	Temperate	grassland	15	25	20	3	7.5567	1.02	0.12005	9.803	18.295	98.117	5	400	14.6	43.1	42.3	576.718	0.3947	923	67	150	Lab	warmed consecutively	Wetting	Both
443	Conant et al. (b)	2008	USA	Mandan	46.767N	100.917W	46.767	-100.917		Top	Temperate	grassland	25	35	30	3	7.5567	1.12	0.12005	9.803	18.295	98.117	5	400	42.471	23.088	34.441	576.718	0.3947	923	67	60	Lab	warmed consecutively	Wetting	Both
444	Conant et al. (b)	2008	USA	Mandan	46.767N	100.917W	46.767	-100.917		Top	Temperate	grassland	4	15	9.5	3	7.5567	1.02	0.12005	9.803	18.295	98.117	5	400	14.6	43.1	42.3	576.718	0.3947	923	67	150	Lab	warmed consecutively	Wetting	Both
445	Conant et al. (b)	2008	USA	Mandan	46.767N	100.917W	46.767	-100.917		Top	Temperate	agriculture	15	25	20	3.25	7.5567	2.8	0.12005	9.803	18.295	98.117	17	665	17.2	48.5	34.3	297.14	0.3556	1475	61	60	Lab	warmed consecutively	Wetting	Both
446	Conant et al. (b)	2008	USA	Mandan	46.767N	100.917W	46.767	-100.917		Top	Temperate	agriculture	15	25	20	3.25	7.5567	3.24	0.12005	9.803	18.295	98.117	17	665	10.8	49.5	29.7	297.14	0.3556	1475	61	450	Lab	warmed consecutively	Wetting	Both
447	Conant et al. (b)	2008	USA	Mandan	46.767N	100.917W	46.767	-100.917		Top	Temperate	agriculture	15	25	20	3.4	7.5567	1.12	0.12005	9.803	18.295	98.117	5	400	42.471	23.088	34.441	576.718	0.3947	923	67	300	Lab	warmed consecutively	Wetting	Both
448	Conant et al. (b)	2008	USA	Mandan	46.767N	100.917W	46.767	-100.917		Top	Temperate	agriculture	15	25	20	3.5	7.5567	2.8	0.12005	9.803	18.295	98.117	17	665	17.2	48.5	34.3	297.14	0.3556	1475	61	300	Lab	warmed consecutively	Wetting	Both
449	Conant et al. (b)	2008	USA	Mandan	46.767N	100.917W	46.767	-100.917		Top	Temperate	grassland	25	35	30	3.5	7.5567	2.8	0.12005	9.803	18.295	98.117	17	665	17.2	48.5	34.3	297.14	0.3556	1475	61	150	Lab	warmed consecutively	Wetting	Both
450	Conant et al. (b)	2008	USA	Mandan	46.767N	100.917W	46.767	-100.917		Top	Temperate	grassland	25	35	30	3.5	7.5567	2.8	0.12005	9.803	18.295	98.117	17	665	17.2	48.5	34.3	297.14	0.3556	1475	61	450	Lab	warmed consecutively	Wetting	Both
451	Conant et al. (b)	2008	USA	Mandan	46.767N	100.917W	46.767	-100.917		Top	Temperate	grassland	25	35	30	3.75	7.5567	3.24	0.12005	9.803	18.295	98.117	17	665	10.8	49.5	29.7	297.14	0.3556	1475	61	450	Lab	warmed consecutively	Wetting	Both
452	Conant et al. (b)	2008	USA	Mandan	46.767N	100.917W	46.767	-100.917		Top	Temperate	grassland	25	35	30	4	7.5567	2.8	0.12005	9.803	18.295	98.117	17	665	17.2	48.5	34.3	297.14	0.3556	1475	61	300	Lab	warmed consecutively	Wetting	Both
453	Conant et al. (b)	2008	USA	Mandan	46.767N	100.917W	46.767	-100.917		Top	Temperate	agriculture	15	25	20	4.25	7.5567	2.8	0.12005	9.803	18.295	98.117	17	665	17.2	48.5	34.3	297.14	0.3556	1475	61	450	Lab	warmed consecutively	Wetting	Both
454	Conant et al. (b)	2008	USA	Mandan	46.767N	100.917W	46.767	-100.917		Top	Temperate	grassland	15	25	20	4.4	7.5567	1.12	0.12005	9.803	18.295	98.117	5	400	42.471	23.088	34.441	576.718	0.3947	923	67	300	Lab	warmed consecutively	Wetting	Both
455	Conant et al. (b)	2008	USA	Mandan	46.767N	100.917W	46.767	-100.917		Top	Temperate	grassland	4	15	9.5	4.4	7.5567	1.12	0.12005	9.803	18.295	98.117	5	400	42.471	23.088	34.441	576.718	0.3947	923	67	450	Lab	warmed consecutively	Wetting	Both
456	Conant et al. (a)	2008	USA	Vernon	33.91N	99.41W	33.92	-99.41	0 to 20	Top	Subtropical	agriculture	25	35	30	1.58	6.6251	1	0.11565	9.071	17.117	91.1	16.97	648	43.77	19	31.63	297.14	0.3742	1481	61	364	Lab	warmed consecutively	Wetting	Both
457	Conant et al. (a)	2008	USA	Vernon	33.91N	99.41W	33.92	-99.41	0 to 20	Top	Subtropical	grassland	25	35	30	1.6	6.6251	1.1	0.11565	9.071	17.117	91.1	16.97	648	43.77	19	31.63	297.14	0.3742	1481	61	364	Lab	warmed consecutively	Wetting	Both
458	Conant et al. (a)	2008	USA	Akron	40.151N	103.151W	40.151	-103.151	0 to 20	Top	Temperate	agriculture	25	35	30	1.88	6.8031	0.7	0.07737	10.674	10.472	91.9	9.32	395	60.625	15.71	23.665	199.855	0.3054	1169	57	364	Lab	warmed consecutively	Wetting	Both
459	Conant et al. (a)	2008	USA	Akron	40.151N	103.151W	40.151	-103.151	0 to 20	Top	Temperate	grassland	25	35	30	1.78	6.8031	1.2	0.07737	10.674	10.472	91.9	9.32	395	60.625	15.71	23.665	199.855	0.3054	1169	57	364	Lab	warmed consecutively	Wetting	Both
460	Conen et al.	2006	Germany	Halle			51.497	11.9688	0 to 30	Top	Temperate	agriculture	5	35	20	3.2	6.9263	1.12	0.16655	10.77	19.513	96.2	9.2	465	69	23	8	532.377	0.4977	747	78	10	Lab	parallel independent samples	None	Both
461	Conen et al.	2006	Germany	Halle			51.497	11.9688	0 to 30	Top	Temperate	agriculture	5	35	20	3.2	6.9263	1.09	0.16655	10.77	19.513	96.2	9.2	465	69	23	8	532.377	0.4977	747	78	10	Lab	parallel independent samples	None	Both
462	Conen et al.	2006	Germany	Rothalmünster			48.3595	13.2027	0 to 30	Top	Temperate	agriculture	5	35	20	3.7	6.1503	1.27	0.09761	11.07	11.803	86.289	8.7	886	10	73	17	297.14	0.5721	842	77	10	Lab	parallel independent samples	None	Both
463	Conen et al.	2008	Switzerland	Basel			47.5596	7.58858	0 to 30	Top	Temperate	agriculture	5	35	20	2.9	5.8685	13.3	0.10578	11.585	11.537	67.16	10.43	775	49.68	22.378	27.942	272.379	0.4767	825	77	11	Lab	parallel independent samples	None	Both
464	Conen et al.	2008	Switzerland	Basel			47.5596	7.58858	0 to 30	Top	Temperate	agriculture	5	35	20	3.3	5.8685	9.2	0.10578	11.585	11.537	67.16	10.43	775	49.68	22.378	27.942	272.379	0.4767	825	77	10	Lab	parallel independent samples	None	Both
465	Coucheney et al.	2013	Sweden	Flakaliden			64.1167	19.45	10	Top	Boreal	forest	4	9	6.5	4.1	4.77	1.59	0.05	31.9	31.6	36.7	2.3	600	57.7	18.4	23.9	426.041	0.4993	490	84	150	Field	warmed consecutively	None	Both
466	Cross and Grace	2010	England	Harwood Forest	55°12'59''N	2°1'28''W	55.2164	-2.02444	5 to 15	Top	Temperate	forest	10	16	13	2.42694	4.9991	39.1	0.45129	20.6	30.138	43.682	7.6	950	40.889	26.78	32.331	450.166	0.674	579	85	78	Lab	warmed consecutively	Roots removed/Wetted	Heterotrophic
467	Cross and Grace	2010	England	Harwood Forest	55°12'59''N	2°1'28''W	55.2164	-2.02444	5 to 15	Top	Temperate	forest	10	16	13	2.34527	4.9991	39.1	0.45129	20.6	30.138	43.682	7.6	950	40.889	26.78	32.331	450.166	0.674	579	85	24	Lab	warmed consecutively	Roots removed/Wetted	Heterotrophic
468	Cross and Grace	2010	England	Harwood Forest	55°12'59''N	2°1'28''W	55.2164	-2.02444	5 to 15	Top	Temperate	forest	16	22	19	2.68488	4.9991	39.1	0.45129	20.6	30.138	43.682	7.6	950	40.889	26.78	32.331	450.166	0.674	579	85	78	Lab	warmed consecutively	Roots removed/Wetted	Heterotrophic
469	Cross and Grace	2010	England	Harwood Forest	55°12'59''N	2°1'28''W	55.2164	-2.02444	5 to 15	Top	Temperate	forest	16	22	19	2.48634	4.9991	39.1	0.45129	20.6	30.138	43.682	7.6	950	40.889	26.78	32.331	450.166	0.674	579	85	24	Lab	warmed consecutively	Roots removed/Wetted	Heterotrophic
470	Cross and Grace	2010	England	Harwood Forest	55°12'59''N	2°1'28''W	55.2164	-2.02444	5 to 15	Top	Temperate	forest	22	30	26	2.29921	4.9991	39.1	0.45129	20.6	30.138	43.682	7.6	950	40.889	26.78	32.331	450.166	0.674	579	85	24	Lab	warmed consecutively	Roots removed/Wetted	Heterotrophic
471	Cross and Grace	2010	England	Harwood Forest	55°12'59''N	2°1'28''W	55.2164	-2.02444	5 to 15	Top	Temperate	forest	22	30	26	3.06949	4.9991	39.1	0.45129	20.6	30.138	43.682	7.6	950	40.889	26.78	32.331	450.166	0.674	579	85	78	Lab	warmed consecutively	Roots removed/Wetted	Heterotrophic
472	Cross and Grace	2010	England	Harwood Forest	55°12'59''N	2°1'28''W	55.2164	-2.02444	5 to 15	Top	Temperate	forest	5	10	7.5	2.66042	4.9991	39.1	0.45129	20.6	30.138	43.682	7.6	950	40.889	26.78	32.331	450.166	0.674	579	85	78	Lab	warmed consecutively	Roots removed/Wetted	Heterotrophic
473	Cross and Grace	2010	England	Harwood Forest	55°12'59''N	2°1'28''W	55.2164	-2.02444	5 to 15	Top	Temperate	forest	5	10	7.5	2.42023	4.9991	39.1	0.45129	20.6	30.138	43.682	7.6	950	40.889	26.78	32.331	450.166	0.674	579	85	24	Lab	warmed consecutively	Roots removed/Wetted	Heterotrophic
474	Curiel Yuste et al.	2007	USA	Tonzi Ranch	38.4311°N	120.966°W	38.4311	-120.966	0 to 5	Top	Subtropical	grassland	20	35	27.5	1.9	6.4858	3.9	0.3	12.5	11.763	83.55	16.3	559	50.891	25.114	23.995	363.889	0.462	1391	63	50	Lab	warmed consecutively	Wetting	Both
475	Curiel Yuste et al.	2007	USA	Tonzi Ranch	38.4311°N	120.966°W	38.4311	-120.966	0 to 5	Top	Subtropical	grassland	20	35	27.5	1.5	6.4858	3.9	0.3	12.5	11.763	83.55	16.3	559	50.891	25.114	23.995	363.889	0.462	1391	63	100	Lab	warmed consecutively	Wetting	Both
476	Curiel Yuste et al.	2007	USA	Tonzi Ranch	38.4311°N	120.966°W	38.4311	-120.966	0 to 5	Top	Subtropical	grassland	20	35	27.5	2	6.4858	1.7	0.2	10.7	11.763	83.55	16.3	559	50.891	25.114	23.995	363.889	0.462	1391	63	50	Lab	warmed consecutively	Wetting	Both
477	Curiel Yuste et al.	2007	USA	Tonzi Ranch	38.4311°N	120.966°W	38.4311	-120.966	0 to 5	Top	Subtropical	grassland	20	35	27.5	1.5	6.4858	1.7	0.2	10.7	11.763	83.55	16.3	559	50.891	25.114	23.995	363.889	0.462	1391	63	100	Lab	warmed consecutively	Wetting	Both
478	Curiel Yuste et al.	2007	USA	Blodgett Forest Research Station	38°53'42.9''N	120°37'57'.9''W	38.8952	-120.633	0 to 5	Top	Subtropical	forest	20	35	27.5	1.7	5.7942	13.9	0.5	29.6	10.752	63.853	11.01	1290	53.202	23.981	22.817	363.889	0.7891	1150	57	50	Lab	warmed consecutively	Wetting	Both
479	Curiel Yuste et al.	2007	USA	Blodgett Forest Research Station	38°53'42.9''N	120°37'57'.9''W	38.8952	-120.633	0 to 5	Top	Subtropical	forest	20	35	27.5	1.5	5.7942	13.9	0.5	29.6	10.752	63.853	11.01	1290	53.202	23.981	22.817	363.889	0.7891	1150	57	100	Lab	warmed consecutively	Wetting	Both
480	Curiel Yuste et al.	2007	USA	Blodgett Forest Research Station	38°53'42.9''N	120°37'57'.9''W	38.8952	-120.633	0 to 5	Top	Subtropical	forest	20	35	27.5	1.7	5.7942	6.4	0.2	28.5	10.752	63.853	11.01	1290	53.202	23.981	22.817	363.889	0.7891	1150	57	50	Lab	warmed consecutively	Wetting	Both
481	Curiel Yuste et al.	2007	USA	Blodgett Forest Research Station	38°53'42.9''N	120°37'57'.9''W	38.8952	-120.633	0 to 5	Top	Subtropical	forest	20	35	27.5	1.6	5.7942	6.4	0.2	28.5	10.752	63.853	11.01	1290	53.202	23.981	22.817	363.889	0.7891	1150	57	100	Lab	warmed consecutively	Wetting	Both
482	Cussack et al.	2010	USA	Luquillo Experimental Forest	18.3°N	65.8°W	18.3	-65.8	0 to 10	Top	Tropical	forest	21	31	26	1.69245	4.1	4.2	0.33	6.942	11.083	50.229	19.94	3357	26.212	18.378	17.51	272.379	0.5454	1335	88	245	Lab	parallel independent samples	Wetting	Both
483	Cussack et al.	2010	USA	Luquillo Experimental Forest	18.3°N	65.8°W	18.3	-65.8	0 to 10	Top	Tropical	forest	21	31	26	1.40566	4.1	4.2	0.33	6.942	11.083	50.229	19.94	3357	26.212	18.378	17.51	272.379	0.5454	1335	88	245	Lab	parallel independent samples	Wetting	Both
484	Cussack et al.	2010	USA	Luquillo Experimental Forest	18.3°N	65.8°W	18.3	-65.8	0 to 10	Top	Tropical	forest	21	31	26	1.50377	4.1	4.2	0.33	6.942	11.083	50.229	19.94	3357	26.212	18.378	17.51	272.379	0.5454	1335	88	245	Lab	parallel independent samples	Wetting	Both
485	Cussack et al.	2010	USA	Luquillo Experimental Forest	18.3°N	65.8°W	18.3	-65.8	0 to 10	Top	Tropical	forest	21	31	26	1.5717	4.1	4.2	0.33	6.942	11.083	50.229	19.94	3357	26.212	18.378	17.51	272.379	0.5454	1335	88	245	Lab	parallel independent samples	Wetting	Both
486	Cussack et al.	2010	USA	Luquillo Experimental Forest	18.3°N	65.8°W	18.3	-65.8	0 to 10	Top	Tropical	forest	21	31	26	1.22453	4.1	4.2	0.33	6.942	11.083	50.229	19.94	3357	26.212	18.378	17.51	272.379	0.5454	1335	88	245	Lab	parallel independent samples	Wetting	Both
487	Cussack et al.	2010	USA	Luquillo Experimental Forest	18.3°N	65.8°W	18.3	-65.8	0 to 10	Top	Tropical	forest	21	31	26	1.39057	4.1	4.2	0.33	6.942	11.083	50.229	19.94	3357	26.212	18.378	17.51	272.379	0.5454	1335	88	245	Lab	parallel independent samples	Wetting	Both
488	Cussack et al.	2010	USA	Luquillo Experimental Forest	18.3°N	65.8°W	18.3	-65.8	0 to 10	Top	Tropical	forest	21	31	26	1.32264	4.1	4.2	0.33	6.942	11.083	50.229	19.94	3357	26.212	18.378	17.51	272.379	0.5454	1335	88	245	Lab	parallel independent samples	Wetting	Both
489	Cussack et al.	2010	USA	Luquillo Experimental Forest	18.3°N	65.8°W	18.3	-65.8	0 to 10	Top	Tropical	forest	21	31	26	1.22453	4.1	4.2	0.33	6.942	11.083	50.229	19.94	3357	26.212	18.378	17.51	272.379	0.5454	1335	88	245	Lab	parallel independent samples	Wetting	Both
490	Cussack et al.	2010	USA	Luquillo Experimental Forest	18.3°N	65.8°W	18.3	-65.8	0 to 10	Top	Tropical	forest	21	31	26	1.18679	4.1	4.2	0.33	6.942	11.083	50.229	19.94	3357	26.212	18.378	17.51	272.379	0.5454	1335	88	245	Lab	parallel independent samples	Wetting	Both
491	Cussack et al.	2010	USA	Luquillo Experimental Forest	18.3°N	65.8°W	18.3	-65.8	0 to 10	Top	Tropical	forest	21	31	26	1.26981	4.1	4.2	0.33	6.942	11.083	50.229	19.94	3357	26.212	18.378	17.51	272.379	0.5454	1335	88	245	Lab	parallel independent samples	Wetting	Both
492	Cussack et al.	2010	USA	Luquillo Experimental Forest	18.3°N	65.8°W	18.3	-65.8	0 to 10	Top	Tropical	forest	21	31	26	1.03585	4.1	4.2	0.33	6.942	11.083	50.229	19.94	3357	26.212	18.378	17.51	272.379	0.5454	1335	88	245	Lab	parallel independent samples	Wetting	Both
493	Cussack et al.	2010	USA	Luquillo Experimental Forest	18.3°N	65.8°W	18.3	-65.8	0 to 10	Top	Tropical	forest	21	31	26	1.00566	4.1	4.2	0.33	6.942	11.083	50.229	19.94	3357	26.212	18.378	17.51	272.379	0.5454	1335	88	245	Lab	parallel independent samples	Wetting	Both
494	Cussack et al.	2010	USA	Luquillo Experimental Forest	18.3°N	65.8°W	18.3	-65.8	0 to 10	Top	Tropical	forest	21	31	26	1.0434	4.1	4.2	0.33	6.942	11.083	50.229	19.94	3357	26.212	18.378	17.51	272.379	0.5454	1335	88	245	Lab	parallel independent samples	Wetting	Both
495	Cussack et al.	2010	USA	Luquillo Experimental Forest	18.3°N	65.8°W	18.3	-65.8	0 to 10	Top	Tropical	forest	21	31	26	1.55303	4.1	4.2	0.33	6.942	11.083	50.229	19.94	3357	26.212	18.378	17.51	272.379	0.5454	1335	88	245	Lab	parallel independent samples	Wetting	Both
496	Cussack et al.	2010	USA	Luquillo Experimental Forest	18.3°N	65.8°W	18.3	-65.8	0 to 10	Top	Tropical	forest	21	31	26	1.53788	4.1	4.2	0.33	6.942	11.083	50.229	19.94	3357	26.212	18.378	17.51	272.379	0.5454	1335	88	245	Lab	parallel independent samples	Wetting	Both
497	Cussack et al.	2010	USA	Luquillo Experimental Forest	18.3°N	65.8°W	18.3	-65.8	0 to 10	Top	Tropical	forest	21	31	26	1.43182	4.1	4.2	0.33	6.942	11.083	50.229	19.94	3357	26.212	18.378	17.51	272.379	0.5454	1335	88	245	Lab	parallel independent samples	Wetting	Both
498	Cussack et al.	2010	USA	Luquillo Experimental Forest	18.3°N	65.8°W	18.3	-65.8	0 to 10	Top	Tropical	forest	21	31	26	1.30303	4.1	4.2	0.33	6.942	11.083	50.229	19.94	3357	26.212	18.378	17.51	272.379	0.5454	1335	88	245	Lab	parallel independent samples	Wetting	Both
499	Cussack et al.	2010	USA	Luquillo Experimental Forest	18.3°N	65.8°W	18.3	-65.8	0 to 10	Top	Tropical	forest	21	31	26	1.75283	4	3.7	0.27	6.942	11.083	50.229	19.94	3357	26.212	18.378	17.51	272.379	0.5454	1335	88	245	Lab	parallel independent samples	Wetting	Both
500	Cussack et al.	2010	USA	Luquillo Experimental Forest	18.3°N	65.8°W	18.3	-65.8	0 to 10	Top	Tropical	forest	21	31	26	1.42075	4	3.7	0.27	6.942	11.083	50.229	19.94	3357	26.212	18.378	17.51	272.379	0.5454	1335	88	245	Lab	parallel independent samples	Wetting	Both
501	Cussack et al.	2010	USA	Luquillo Experimental Forest	18.3°N	65.8°W	18.3	-65.8	0 to 10	Top	Tropical	forest	21	31	26	1.49623	4	3.7	0.27	6.942	11.083	50.229	19.94	3357	26.212	18.378	17.51	272.379	0.5454	1335	88	245	Lab	parallel independent samples	Wetting	Both
502	Cussack et al.	2010	USA	Luquillo Experimental Forest	18.3°N	65.8°W	18.3	-65.8	0 to 10	Top	Tropical	forest	21	31	26	1.56415	4	3.7	0.27	6.942	11.083	50.229	19.94	3357	26.212	18.378	17.51	272.379	0.5454	1335	88	245	Lab	parallel independent samples	Wetting	Both
503	Cussack et al.	2010	USA	Luquillo Experimental Forest	18.3°N	65.8°W	18.3	-65.8	0 to 10	Top	Tropical	forest	21	31	26	1.28491	4	3.7	0.27	6.942	11.083	50.229	19.94	3357	26.212	18.378	17.51	272.379	0.5454	1335	88	245	Lab	parallel independent samples	Wetting	Both
504	Cussack et al.	2010	USA	Luquillo Experimental Forest	18.3°N	65.8°W	18.3	-65.8	0 to 10	Top	Tropical	forest	21	31	26	1.48868	4	3.7	0.27	6.942	11.083	50.229	19.94	3357	26.212	18.378	17.51	272.379	0.5454	1335	88	245	Lab	parallel independent samples	Wetting	Both
505	Cussack et al.	2010	USA	Luquillo Experimental Forest	18.3°N	65.8°W	18.3	-65.8	0 to 10	Top	Tropical	forest	21	31	26	1.38302	4	3.7	0.27	6.942	11.083	50.229	19.94	3357	26.212	18.378	17.51	272.379	0.5454	1335	88	245	Lab	parallel independent samples	Wetting	Both
506	Cussack et al.	2010	USA	Luquillo Experimental Forest	18.3°N	65.8°W	18.3	-65.8	0 to 10	Top	Tropical	forest	21	31	26	1.48113	4	3.7	0.27	6.942	11.083	50.229	19.94	3357	26.212	18.378	17.51	272.379	0.5454	1335	88	245	Lab	parallel independent samples	Wetting	Both
507	Cussack et al.	2010	USA	Luquillo Experimental Forest	18.3°N	65.8°W	18.3	-65.8	0 to 10	Top	Tropical	forest	21	31	26	1.48868	4	3.7	0.27	6.942	11.083	50.229	19.94	3357	26.212	18.378	17.51	272.379	0.5454	1335	88	245	Lab	parallel independent samples	Wetting	Both
508	Cussack et al.	2010	USA	Luquillo Experimental Forest	18.3°N	65.8°W	18.3	-65.8	0 to 10	Top	Tropical	forest	21	31	26	1.48868	4	3.7	0.27	6.942	11.083	50.229	19.94	3357	26.212	18.378	17.51	272.379	0.5454	1335	88	245	Lab	parallel independent samples	Wetting	Both
509	Cussack et al.	2010	USA	Luquillo Experimental Forest	18.3°N	65.8°W	18.3	-65.8	0 to 10	Top	Tropical	forest	21	31	26	1.54151	4	3.7	0.27	6.942	11.083	50.229	19.94	3357	26.212	18.378	17.51	272.379	0.5454	1335	88	245	Lab	parallel independent samples	Wetting	Both
510	Cussack et al.	2010	USA	Luquillo Experimental Forest	18.3°N	65.8°W	18.3	-65.8	0 to 10	Top	Tropical	forest	21	31	26	1.22453	4	3.7	0.27	6.942	11.083	50.229	19.94	3357	26.212	18.378	17.51	272.379	0.5454	1335	88	245	Lab	parallel independent samples	Wetting	Both
511	Cussack et al.	2010	USA	Luquillo Experimental Forest	18.3°N	65.8°W	18.3	-65.8	0 to 10	Top	Tropical	forest	21	31	26	1.36792	4	3.7	0.27	6.942	11.083	50.229	19.94	3357	26.212	18.378	17.51	272.379	0.5454	1335	88	245	Lab	parallel independent samples	Wetting	Both
512	Cussack et al.	2010	USA	Luquillo Experimental Forest	18.3°N	65.8°W	18.3	-65.8	0 to 10	Top	Tropical	forest	21	31	26	1.4283	4	3.7	0.27	6.942	11.083	50.229	19.94	3357	26.212	18.378	17.51	272.379	0.5454	1335	88	245	Lab	parallel independent samples	Wetting	Both
513	Cussack et al.	2010	USA	Luquillo Experimental Forest	18.3°N	65.8°W	18.3	-65.8	0 to 10	Top	Tropical	forest	21	31	26	1.1717	4	3.7	0.27	6.942	11.083	50.229	19.94	3357	26.212	18.378	17.51	272.379	0.5454	1335	88	245	Lab	parallel independent samples	Wetting	Both
514	Cussack et al.	2010	USA	Luquillo Experimental Forest	18.3°N	65.8°W	18.3	-65.8	0 to 10	Top	Tropical	forest	21	31	26	1.5	4	3.7	0.27	6.942	11.083	50.229	19.94	3357	26.212	18.378	17.51	272.379	0.5454	1335	88	245	Lab	parallel independent samples	Wetting	Both
515	Cussack et al.	2010	USA	Luquillo Experimental Forest	18.3°N	65.8°W	18.3	-65.8	0 to 10	Top	Tropical	forest	21	31	26	1.5	4	3.7	0.27	6.942	11.083	50.229	19.94	3357	26.212	18.378	17.51	272.379	0.5454	1335	88	245	Lab	parallel independent samples	Wetting	Both
516	Cussack et al.	2010	USA	Luquillo Experimental Forest	18.3°N	65.8°W	18.3	-65.8	0 to 10	Top	Tropical	forest	21	31	26	1.51515	4	3.7	0.27	6.942	11.083	50.229	19.94	3357	26.212	18.378	17.51	272.379	0.5454	1335	88	245	Lab	parallel independent samples	Wetting	Both
517	Cussack et al.	2010	USA	Luquillo Experimental Forest	18.3°N	65.8°W	18.3	-65.8	0 to 10	Top	Tropical	forest	21	31	26	1.52273	4	3.7	0.27	6.942	11.083	50.229	19.94	3357	26.212	18.378	17.51	272.379	0.5454	1335	88	245	Lab	parallel independent samples	Wetting	Both
518	Cussack et al.	2010	USA	Luquillo Experimental Forest	18.3°N	65.8°W	18.3	-65.8	0 to 10	Top	Tropical	forest	21	31	26	1.32576	4	3.7	0.27	6.942	11.083	50.229	19.94	3357	26.212	18.378	17.51	272.379	0.5454	1335	88	245	Lab	parallel independent samples	Wetting	Both
519	Cussack et al.	2010	USA	Luquillo Experimental Forest	18.3°N	65.8°W	18.3	-65.8	0 to 10	Top	Tropical	forest	21	31	26	1.32576	4	3.7	0.27	6.942	11.083	50.229	19.94	3357	26.212	18.378	17.51	272.379	0.5454	1335	88	245	Lab	parallel independent samples	Wetting	Both
520	Cussack et al.	2010	USA	Luquillo Experimental Forest	18.3°N	65.8°W	18.3	-65.8	0 to 10	Top	Tropical	forest	21	31	26	1.66596	3.9	6.7	0.31	6.942	11.083	50.229	19.94	4300	26.212	18.378	17.51	272.379	0.5454	1335	88	245	Lab	parallel independent samples	Wetting	Both
521	Cussack et al.	2010	USA	Luquillo Experimental Forest	18.3°N	65.8°W	18.3	-65.8	0 to 10	Top	Tropical	forest	21	31	26	1.60593	3.9	6.7	0.31	6.942	11.083	50.229	19.94	4300	26.212	18.378	17.51	272.379	0.5454	1335	88	245	Lab	parallel independent samples	Wetting	Both
522	Cussack et al.	2010	USA	Luquillo Experimental Forest	18.3°N	65.8°W	18.3	-65.8	0 to 10	Top	Tropical	forest	21	31	26	1.64371	3.9	6.7	0.31	6.942	11.083	50.229	19.94	4300	26.212	18.378	17.51	272.379	0.5454	1335	88	245	Lab	parallel independent samples	Wetting	Both
523	Cussack et al.	2010	USA	Luquillo Experimental Forest	18.3°N	65.8°W	18.3	-65.8	0 to 10	Top	Tropical	forest	21	31	26	1.90705	3.9	6.7	0.31	6.942	11.083	50.229	19.94	4300	26.212	18.378	17.51	272.379	0.5454	1335	88	245	Lab	parallel independent samples	Wetting	Both
524	Cussack et al.	2010	USA	Luquillo Experimental Forest	18.3°N	65.8°W	18.3	-65.8	0 to 10	Top	Tropical	forest	21	31	26	2.03511	3.9	6.7	0.31	6.942	11.083	50.229	19.94	4300	26.212	18.378	17.51	272.379	0.5454	1335	88	245	Lab	parallel independent samples	Wetting	Both
525	Cussack et al.	2010	USA	Luquillo Experimental Forest	18.3°N	65.8°W	18.3	-65.8	0 to 10	Top	Tropical	forest	21	31	26	1.90769	3.9	6.7	0.31	6.942	11.083	50.229	19.94	4300	26.212	18.378	17.51	272.379	0.5454	1335	88	245	Lab	parallel independent samples	Wetting	Both
526	Cussack et al.	2010	USA	Luquillo Experimental Forest	18.3°N	65.8°W	18.3	-65.8	0 to 10	Top	Tropical	forest	21	31	26	1.63756	3.9	6.7	0.31	6.942	11.083	50.229	19.94	4300	26.212	18.378	17.51	272.379	0.5454	1335	88	245	Lab	parallel independent samples	Wetting	Both
527	Cussack et al.	2010	USA	Luquillo Experimental Forest	18.3°N	65.8°W	18.3	-65.8	0 to 10	Top	Tropical	forest	21	31	26	1.46532	3.9	6.7	0.31	6.942	11.083	50.229	19.94	4300	26.212	18.378	17.51	272.379	0.5454	1335	88	245	Lab	parallel independent samples	Wetting	Both
528	Cussack et al.	2010	USA	Luquillo Experimental Forest	18.3°N	65.8°W	18.3	-65.8	0 to 10	Top	Tropical	forest	21	31	26	1.60902	3.9	6.7	0.31	6.942	11.083	50.229	19.94	4300	26.212	18.378	17.51	272.379	0.5454	1335	88	245	Lab	parallel independent samples	Wetting	Both
529	Cussack et al.	2010	USA	Luquillo Experimental Forest	18.3°N	65.8°W	18.3	-65.8	0 to 10	Top	Tropical	forest	21	31	26	1.71511	3.9	6.7	0.31	6.942	11.083	50.229	19.94	4300	26.212	18.378	17.51	272.379	0.5454	1335	88	245	Lab	parallel independent samples	Wetting	Both
530	Cussack et al.	2010	USA	Luquillo Experimental Forest	18.3°N	65.8°W	18.3	-65.8	0 to 10	Top	Tropical	forest	21	31	26	1.76809	3.9	6.7	0.31	6.942	11.083	50.229	19.94	4300	26.212	18.378	17.51	272.379	0.5454	1335	88	245	Lab	parallel independent samples	Wetting	Both
531	Cussack et al.	2010	USA	Luquillo Experimental Forest	18.3°N	65.8°W	18.3	-65.8	0 to 10	Top	Tropical	forest	21	31	26	1.65579	3.9	6.7	0.31	6.942	11.083	50.229	19.94	4300	26.212	18.378	17.51	272.379	0.5454	1335	88	245	Lab	parallel independent samples	Wetting	Both
532	Cussack et al.	2010	USA	Luquillo Experimental Forest	18.3°N	65.8°W	18.3	-65.8	0 to 10	Top	Tropical	forest	21	31	26	1.36339	3.9	6.7	0.31	6.942	11.083	50.229	19.94	4300	26.212	18.378	17.51	272.379	0.5454	1335	88	245	Lab	parallel independent samples	Wetting	Both
533	Cussack et al.	2010	USA	Luquillo Experimental Forest	18.3°N	65.8°W	18.3	-65.8	0 to 10	Top	Tropical	forest	21	31	26	1.53695	3.9	6.7	0.31	6.942	11.083	50.229	19.94	4300	26.212	18.378	17.51	272.379	0.5454	1335	88	245	Lab	parallel independent samples	Wetting	Both
534	Cussack et al.	2010	USA	Luquillo Experimental Forest	18.3°N	65.8°W	18.3	-65.8	0 to 10	Top	Tropical	forest	21	31	26	1.19905	3.9	6.7	0.31	6.942	11.083	50.229	19.94	4300	26.212	18.378	17.51	272.379	0.5454	1335	88	245	Lab	parallel independent samples	Wetting	Both
535	Cussack et al.	2010	USA	Luquillo Experimental Forest	18.3°N	65.8°W	18.3	-65.8	0 to 10	Top	Tropical	forest	21	31	26	1.60505	3.9	6.7	0.31	6.942	11.083	50.229	19.94	4300	26.212	18.378	17.51	272.379	0.5454	1335	88	245	Lab	parallel independent samples	Wetting	Both
536	Cussack et al.	2010	USA	Luquillo Experimental Forest	18.3°N	65.8°W	18.3	-65.8	0 to 10	Top	Tropical	forest	21	31	26	1.61238	3.9	6.7	0.31	6.942	11.083	50.229	19.94	4300	26.212	18.378	17.51	272.379	0.5454	1335	88	245	Lab	parallel independent samples	Wetting	Both
537	Cussack et al.	2010	USA	Luquillo Experimental Forest	18.3°N	65.8°W	18.3	-65.8	0 to 10	Top	Tropical	forest	21	31	26	1.85149	3.9	6.7	0.31	6.942	11.083	50.229	19.94	4300	26.212	18.378	17.51	272.379	0.5454	1335	88	245	Lab	parallel independent samples	Wetting	Both
538	Cussack et al.	2010	USA	Luquillo Experimental Forest	18.3°N	65.8°W	18.3	-65.8	0 to 10	Top	Tropical	forest	21	31	26	1.75941	3.9	6.7	0.31	6.942	11.083	50.229	19.94	4300	26.212	18.378	17.51	272.379	0.5454	1335	88	245	Lab	parallel independent samples	Wetting	Both
539	Cussack et al.	2010	USA	Luquillo Experimental Forest	18.3°N	65.8°W	18.3	-65.8	0 to 10	Top	Tropical	forest	21	31	26	1.35904	3.9	6.7	0.31	6.942	11.083	50.229	19.94	4300	26.212	18.378	17.51	272.379	0.5454	1335	88	245	Lab	parallel independent samples	Wetting	Both
540	Cussack et al.	2010	USA	Luquillo Experimental Forest	18.3°N	65.8°W	18.3	-65.8	0 to 10	Top	Tropical	forest	21	31	26	1.4177	3.9	6.7	0.31	6.942	11.083	50.229	19.94	4300	26.212	18.378	17.51	272.379	0.5454	1335	88	245	Lab	parallel independent samples	Wetting	Both
541	Cussack et al.	2010	USA	Luquillo Experimental Forest	18.3°N	65.8°W	18.3	-65.8	0 to 10	Top	Tropical	forest	21	31	26	1.73361	4.1	3.5	0.18	6.942	11.083	50.229	19.94	4300	26.212	18.378	17.51	272.379	0.5454	1335	88	245	Lab	parallel independent samples	Wetting	Both
542	Cussack et al.	2010	USA	Luquillo Experimental Forest	18.3°N	65.8°W	18.3	-65.8	0 to 10	Top	Tropical	forest	21	31	26	1.68864	4.1	3.5	0.18	6.942	11.083	50.229	19.94	4300	26.212	18.378	17.51	272.379	0.5454	1335	88	245	Lab	parallel independent samples	Wetting	Both
543	Cussack et al.	2010	USA	Luquillo Experimental Forest	18.3°N	65.8°W	18.3	-65.8	0 to 10	Top	Tropical	forest	21	31	26	1.86929	4.1	3.5	0.18	6.942	11.083	50.229	19.94	4300	26.212	18.378	17.51	272.379	0.5454	1335	88	245	Lab	parallel independent samples	Wetting	Both
544	Cussack et al.	2010	USA	Luquillo Experimental Forest	18.3°N	65.8°W	18.3	-65.8	0 to 10	Top	Tropical	forest	21	31	26	2.08752	4.1	3.5	0.18	6.942	11.083	50.229	19.94	4300	26.212	18.378	17.51	272.379	0.5454	1335	88	245	Lab	parallel independent samples	Wetting	Both
545	Cussack et al.	2010	USA	Luquillo Experimental Forest	18.3°N	65.8°W	18.3	-65.8	0 to 10	Top	Tropical	forest	21	31	26	1.77193	4.1	3.5	0.18	6.942	11.083	50.229	19.94	4300	26.212	18.378	17.51	272.379	0.5454	1335	88	245	Lab	parallel independent samples	Wetting	Both
546	Cussack et al.	2010	USA	Luquillo Experimental Forest	18.3°N	65.8°W	18.3	-65.8	0 to 10	Top	Tropical	forest	21	31	26	1.94527	4.1	3.5	0.18	6.942	11.083	50.229	19.94	4300	26.212	18.378	17.51	272.379	0.5454	1335	88	245	Lab	parallel independent samples	Wetting	Both
547	Cussack et al.	2010	USA	Luquillo Experimental Forest	18.3°N	65.8°W	18.3	-65.8	0 to 10	Top	Tropical	forest	21	31	26	1.94585	4.1	3.5	0.18	6.942	11.083	50.229	19.94	4300	26.212	18.378	17.51	272.379	0.5454	1335	88	245	Lab	parallel independent samples	Wetting	Both
548	Cussack et al.	2010	USA	Luquillo Experimental Forest	18.3°N	65.8°W	18.3	-65.8	0 to 10	Top	Tropical	forest	21	31	26	1.5781	4.1	3.5	0.18	6.942	11.083	50.229	19.94	4300	26.212	18.378	17.51	272.379	0.5454	1335	88	245	Lab	parallel independent samples	Wetting	Both
549	Cussack et al.	2010	USA	Luquillo Experimental Forest	18.3°N	65.8°W	18.3	-65.8	0 to 10	Top	Tropical	forest	21	31	26	1.43609	4.1	3.5	0.18	6.942	11.083	50.229	19.94	4300	26.212	18.378	17.51	272.379	0.5454	1335	88	245	Lab	parallel independent samples	Wetting	Both
550	Cussack et al.	2010	USA	Luquillo Experimental Forest	18.3°N	65.8°W	18.3	-65.8	0 to 10	Top	Tropical	forest	21	31	26	1.79782	4.1	3.5	0.18	6.942	11.083	50.229	19.94	4300	26.212	18.378	17.51	272.379	0.5454	1335	88	245	Lab	parallel independent samples	Wetting	Both
551	Cussack et al.	2010	USA	Luquillo Experimental Forest	18.3°N	65.8°W	18.3	-65.8	0 to 10	Top	Tropical	forest	21	31	26	1.61773	4.1	3.5	0.18	6.942	11.083	50.229	19.94	4300	26.212	18.378	17.51	272.379	0.5454	1335	88	245	Lab	parallel independent samples	Wetting	Both
552	Cussack et al.	2010	USA	Luquillo Experimental Forest	18.3°N	65.8°W	18.3	-65.8	0 to 10	Top	Tropical	forest	21	31	26	1.22722	4.1	3.5	0.18	6.942	11.083	50.229	19.94	4300	26.212	18.378	17.51	272.379	0.5454	1335	88	245	Lab	parallel independent samples	Wetting	Both
553	Cussack et al.	2010	USA	Luquillo Experimental Forest	18.3°N	65.8°W	18.3	-65.8	0 to 10	Top	Tropical	forest	21	31	26	1.34083	4.1	3.5	0.18	6.942	11.083	50.229	19.94	4300	26.212	18.378	17.51	272.379	0.5454	1335	88	245	Lab	parallel independent samples	Wetting	Both
554	Cussack et al.	2010	USA	Luquillo Experimental Forest	18.3°N	65.8°W	18.3	-65.8	0 to 10	Top	Tropical	forest	21	31	26	1.31888	4.1	3.5	0.18	6.942	11.083	50.229	19.94	4300	26.212	18.378	17.51	272.379	0.5454	1335	88	245	Lab	parallel independent samples	Wetting	Both
555	Cussack et al.	2010	USA	Luquillo Experimental Forest	18.3°N	65.8°W	18.3	-65.8	0 to 10	Top	Tropical	forest	21	31	26	1.35694	4.1	3.5	0.18	6.942	11.083	50.229	19.94	4300	26.212	18.378	17.51	272.379	0.5454	1335	88	245	Lab	parallel independent samples	Wetting	Both
556	Cussack et al.	2010	USA	Luquillo Experimental Forest	18.3°N	65.8°W	18.3	-65.8	0 to 10	Top	Tropical	forest	21	31	26	1.6652	4.1	3.5	0.18	6.942	11.083	50.229	19.94	4300	26.212	18.378	17.51	272.379	0.5454	1335	88	245	Lab	parallel independent samples	Wetting	Both
557	Cussack et al.	2010	USA	Luquillo Experimental Forest	18.3°N	65.8°W	18.3	-65.8	0 to 10	Top	Tropical	forest	21	31	26	1.71764	4.1	3.5	0.18	6.942	11.083	50.229	19.94	4300	26.212	18.378	17.51	272.379	0.5454	1335	88	245	Lab	parallel independent samples	Wetting	Both
558	Cussack et al.	2010	USA	Luquillo Experimental Forest	18.3°N	65.8°W	18.3	-65.8	0 to 10	Top	Tropical	forest	21	31	26	2.06951	4.1	3.5	0.18	6.942	11.083	50.229	19.94	4300	26.212	18.378	17.51	272.379	0.5454	1335	88	245	Lab	parallel independent samples	Wetting	Both
559	Cussack et al.	2010	USA	Luquillo Experimental Forest	18.3°N	65.8°W	18.3	-65.8	0 to 10	Top	Tropical	forest	21	31	26	2.0752	4.1	3.5	0.18	6.942	11.083	50.229	19.94	4300	26.212	18.378	17.51	272.379	0.5454	1335	88	245	Lab	parallel independent samples	Wetting	Both
560	Cussack et al.	2010	USA	Luquillo Experimental Forest	18.3°N	65.8°W	18.3	-65.8	0 to 10	Top	Tropical	forest	21	31	26	1.68236	4.1	3.5	0.18	6.942	11.083	50.229	19.94	4300	26.212	18.378	17.51	272.379	0.5454	1335	88	245	Lab	parallel independent samples	Wetting	Both
561	Cussack et al.	2010	USA	Luquillo Experimental Forest	18.3°N	65.8°W	18.3	-65.8	0 to 10	Top	Tropical	forest	21	31	26	1.56058	4.1	3.5	0.18	6.942	11.083	50.229	19.94	4300	26.212	18.378	17.51	272.379	0.5454	1335	88	245	Lab	parallel independent samples	Wetting	Both
562	Dalias et al.	2001	Sweden	Vindeln	64° 00'N	21°05'E	64.202	19.7189		Top	Boreal	forest	4	10	7	4	3.6	44	1.17	37.6	31.6	36.7	0.2	604	57.7	18.4	23.9	426.041	0.5414	498	84	550	Lab	parallel independent samples	Wetting	Both
563	Dalias et al.	2001	Sweden	Vindeln	64° 00'N	21°05'E	64.202	19.7189		Top	Boreal	forest	10	16	13	2	3.6	44	1.17	37.6	31.6	36.7	0.2	604	57.7	18.4	23.9	426.041	0.5414	498	84	550	Lab	parallel independent samples	Wetting	Both
564	Dalias et al.	2001	France	Thezan	43°07'N	2°45'E	43.1167	2.75		Top	Subtropical	forest	23	30	26.5	1.6	4.3	38.8	0.9	42.6	13.443	80.485	14.4	579	44.501	24.267	31.232	1323.81	0.4739	992	70	550	Lab	parallel independent samples	Wetting	Both
565	Dalias et al.	2001	France	Thezan	43°07'N	2°45'E	43.1167	2.75		Top	Subtropical	forest	23	30	26.5	1.3	5.2	4.7	0.12	39.2	13.443	80.485	14.4	579	44.501	24.267	31.232	1323.81	0.4739	992	70	550	Lab	parallel independent samples	Wetting	Both
566	Dalias et al.	2001	France	Thezan	43°07'N	2°45'E	43.1167	2.75		Top	Subtropical	forest	4	10	7	3.8	5.2	4.7	0.12	39.2	13.443	80.485	14.4	579	44.501	24.267	31.232	1323.81	0.4739	992	70	550	Lab	parallel independent samples	Wetting	Both
567	Dalias et al.	2001	France	La Clape	43°03'N	3°08'E	43.1583	3.1		Top	Subtropical	forest	10	16	13	1.7	7.7	2.6	0.12	21.7	9.746	64.49	14.8	587	30.489	17.107	21.804	1323.81	0.4303	989	68	550	Lab	parallel independent samples	Wetting	Both
568	Dalias et al.	2001	France	Thezan	43°07'N	2°45'E	43.1167	2.75		Top	Subtropical	forest	10	16	13	2.8	5.2	4.7	0.12	39.2	13.443	80.485	14.4	579	44.501	24.267	31.232	1323.81	0.4739	992	70	550	Lab	parallel independent samples	Wetting	Both
569	Dalias et al.	2001	France	La Clape	43°03'N	3°08'E	43.1583	3.1		Top	Subtropical	forest	16	23	19.5	1.8	7.7	2.6	0.12	21.7	9.746	64.49	14.8	587	30.489	17.107	21.804	1323.81	0.4303	989	68	550	Lab	parallel independent samples	Wetting	Both
570	Dalias et al.	2001	France	Thezan	43°07'N	2°45'E	43.1167	2.75		Top	Subtropical	forest	16	23	19.5	1.9	5.2	4.7	0.12	39.2	13.443	80.485	14.4	579	44.501	24.267	31.232	1323.81	0.4739	992	70	550	Lab	parallel independent samples	Wetting	Both
571	Dalias et al.	2001	France	La Clape	43°03'N	3°08'E	43.1583	3.1		Top	Subtropical	forest	23	30	26.5	1.8	7.7	2.6	0.12	21.7	9.746	64.49	14.8	587	30.489	17.107	21.804	1323.81	0.4303	989	68	550	Lab	parallel independent samples	Wetting	Both
572	Dalias et al.	2001	France	Thezan	43°07'N	2°45'E	43.1167	2.75		Top	Subtropical	forest	10	16	13	1.6	4.3	38.8	0.9	42.6	13.443	80.485	14.4	579	44.501	24.267	31.232	1323.81	0.4739	992	70	550	Lab	parallel independent samples	Wetting	Both
573	Dalias et al.	2001	France	Thezan	43°07'N	2°45'E	43.1167	2.75		Top	Subtropical	forest	16	23	19.5	1.6	4.3	38.8	0.9	42.6	13.443	80.485	14.4	579	44.501	24.267	31.232	1323.81	0.4739	992	70	550	Lab	parallel independent samples	Wetting	Both
574	Dalias et al.	2001	Germany	Waldstein	50°08'N	11°52'E	50.1333	11.8667		Top	Temperate	forest	23	30	26.5	1.1	3.4	47.2	1.8	26.2	11.164	40.269	5.5	890	48.062	22.257	29.681	363.889	0.6025	645	79	550	Lab	parallel independent samples	Wetting	Both
575	Dalias et al.	2001	Germany	Waldstein	50°08'N	11°52'E	50.1333	11.8667		Top	Temperate	forest	23	30	26.5	1	3.5	34	1.07	31.8	11.164	40.269	5.5	890	48.062	22.257	29.681	363.889	0.6025	645	79	550	Lab	parallel independent samples	Wetting	Both
576	Dalias et al.	2001	Germany	Waldstein	50°08'N	11°52'E	50.1333	11.8667		Top	Temperate	forest	4	10	7	1.9	3.4	47.2	1.8	26.2	11.164	40.269	5.5	890	48.062	22.257	29.681	363.889	0.6025	645	79	550	Lab	parallel independent samples	Wetting	Both
577	Dalias et al.	2001	Germany	Waldstein	50°08'N	11°52'E	50.1333	11.8667		Top	Temperate	forest	4	10	7	3	3.5	34	1.07	31.8	11.164	40.269	5.5	890	48.062	22.257	29.681	363.889	0.6025	645	79	550	Lab	parallel independent samples	Wetting	Both
578	Dalias et al.	2001	Germany	Waldstein	50°08'N	11°52'E	50.1333	11.8667		Top	Temperate	forest	10	16	13	1.5	3.5	34	1.07	31.8	11.164	40.269	5.5	890	48.062	22.257	29.681	363.889	0.6025	645	79	550	Lab	parallel independent samples	Wetting	Both
579	Dalias et al.	2001	Germany	Waldstein	50°08'N	11°52'E	50.1333	11.8667		Top	Temperate	forest	16	23	19.5	2	3.5	34	1.07	31.8	11.164	40.269	5.5	890	48.062	22.257	29.681	363.889	0.6025	645	79	550	Lab	parallel independent samples	Wetting	Both
580	Dalias et al.	2001	Germany	Waldstein	50°08'N	11°52'E	50.1333	11.8667		Top	Temperate	forest	10	16	13	2.1	3.4	47.2	1.8	26.2	11.164	40.269	5.5	890	48.062	22.257	29.681	363.889	0.6025	645	79	550	Lab	parallel independent samples	Wetting	Both
581	Dalias et al.	2001	Germany	Waldstein	50°08'N	11°52'E	50.1333	11.8667		Top	Temperate	forest	16	23	19.5	1.5	3.4	47.2	1.8	26.2	11.164	40.269	5.5	890	48.062	22.257	29.681	363.889	0.6025	645	79	550	Lab	parallel independent samples	Wetting	Both
582	Dalias et al.	2001	UK	Haldon	50°37'N	3°40'W	50.6167	-3.66667		Top	Temperate	forest	23	30	26.5	3.4	4.9	5.7	0.38	15	11.878	64.91	11	1096	44.192	25.577	30.231	209.716	0.7506	606	85	550	Lab	parallel independent samples	Wetting	Both
583	Dalias et al.	2001	UK	Haldon	50°37'N	3°40'W	50.6167	-3.66667		Top	Temperate	forest	4	10	7	3.5	4.9	5.7	0.38	15	11.878	64.91	11	1096	44.192	25.577	30.231	209.716	0.7506	606	85	550	Lab	parallel independent samples	Wetting	Both
584	Dalias et al.	2001	UK	Haldon	50°37'N	3°40'W	50.6167	-3.66667		Top	Temperate	forest	10	16	13	3.4	4.9	5.7	0.38	15	11.878	64.91	11	1096	44.192	25.577	30.231	209.716	0.7506	606	85	550	Lab	parallel independent samples	Wetting	Both
585	Dalias et al.	2001	UK	Haldon	50°37'N	3°40'W	50.6167	-3.66667		Top	Temperate	forest	16	23	19.5	3.1	4.9	5.7	0.38	15	11.878	64.91	11	1096	44.192	25.577	30.231	209.716	0.7506	606	85	550	Lab	parallel independent samples	Wetting	Both
586	Darenova et al.	2014	Czech Republic	Bily Kriz			49.5	18.5333	3	Top	Temperate	forest	5	20	12.5	2	6.4343	1.20342	0.1151	11.003	13.743	80.72	6.8	1318	45.59	23.998	30.412	297.14	0.6251	697	78	165	Field	warmed consecutively	None	Both
587	Darenova et al.	2014	Czech Republic	Bily Kriz			49.5	18.5333	3	Top	Temperate	forest	5	20	12.5	1.9	6.4343	1.20342	0.1151	11.003	13.743	80.72	6.8	1318	45.59	23.998	30.412	297.14	0.6251	697	78	165	Field	warmed consecutively	None	Both
588	Davidson et al.	1998	USA	Harvard Forest	42°32'N	72°11'W	42.5333	-72.1833	10	Top	Temperate	forest	0	20	10	3.5	4.7068	2.83488	0.22057	16.359	14.164	35.32	6	1100	58.293	13.778	27.929	447.864	0.6698	927	68	35	Field	warmed consecutively	None	Both
589	Davidson et al.	1998	USA	Harvard Forest	42°32'N	72°11'W	42.5333	-72.1833	10	Top	Temperate	forest	0	20	10	4.5	4.7068	2.83488	0.22057	16.359	14.164	35.32	6	1100	58.293	13.778	27.929	447.864	0.6698	927	68	35	Field	warmed consecutively	None	Both
590	Davidson et al.	1998	USA	Harvard Forest	42°32'N	72°11'W	42.5333	-72.1833	10	Top	Temperate	forest	0	20	10	4	4.7068	2.83488	0.22057	16.359	14.164	35.32	6	1100	58.293	13.778	27.929	447.864	0.6698	927	68	35	Field	warmed consecutively	None	Both
591	Davidson et al.	1998	USA	Harvard Forest	42°32'N	72°11'W	42.5333	-72.1833	10	Top	Temperate	forest	0	20	10	4.1	4.7068	2.83488	0.22057	16.359	14.164	35.32	6	1100	58.293	13.778	27.929	447.864	0.6698	927	68	35	Field	warmed consecutively	None	Both
592	Davidson et al.	1998	USA	Harvard Forest	42°32'N	72°11'W	42.5333	-72.1833	10	Top	Temperate	forest	0	20	10	3.4	4.7068	2.83488	0.22057	16.359	14.164	35.32	6	1100	58.293	13.778	27.929	447.864	0.6698	927	68	35	Field	warmed consecutively	None	Both
593	De Neve	1996	Belgium	Pittem			50.9943	3.26667		Top	Temperate	agriculture	16	25	20.5	1.6	5.5893	1.3573	0.1478	11.71	14.045	71.416	10.13	795	47.115	17.467	35.418	272.379	0.59	664	83	300	Lab	parallel independent samples	Vegetation removed	Both
594	De Neve	1996	Belgium	Pittem			50.9943	3.26667		Top	Temperate	agriculture	16	25	20.5	4	5.5893	1.3573	0.1478	11.71	14.045	71.416	10.13	795	47.115	17.467	35.418	272.379	0.59	664	83	300	Lab	parallel independent samples	Vegetation removed	Both
595	De Neve	1996	Belgium	Pittem			50.9943	3.26667		Top	Temperate	agriculture	16	25	20.5	2.01	5.5893	1.3573	0.1478	11.71	14.045	71.416	10.13	795	47.115	17.467	35.418	272.379	0.59	664	83	300	Lab	parallel independent samples	Vegetation removed	Both
[truncated: 2,818 more rows]

## Sheet: Generalized data approach
ID	Author	Published Year	Country	Site	Latitude	Longitude	WGS 84 N	WGS 84 E	Depth [cm]	Top/Subsoil	Climatezone	Vegetation	Tmin [°C]	Tmax [°C]	Tmean [°C]	Q10	pH	C [%]	N [%]	CN	CEC [cmol kg-1]	Bsat [%]	MAT [°C]	MAP [mm]	Sand [%]	Clay [%]	Silt [%]	P [g m-2]	NDVI	PET [mm]	Humidity [%]	Inkubationtime [d]	Type	Sequential/parallel warming	Pre-Treatment	Mixed vs. Heterotrophic
[truncated: 3,413 more rows]

[truncated: 1 more sheets: Legend]
